# Supplementary material for: Adaptation and Resistance: How Bacteroides thetaiotaomicron Copes with the Bisphenol A Substitute Bisphenol F
Source: MDPI journal article supplement (doi:10.3390/microorganisms10081610), 2022-08-09
Supplement: s1 [file s1]

Supplementary Figure S2 – Boxplot of median normalized protein abundances

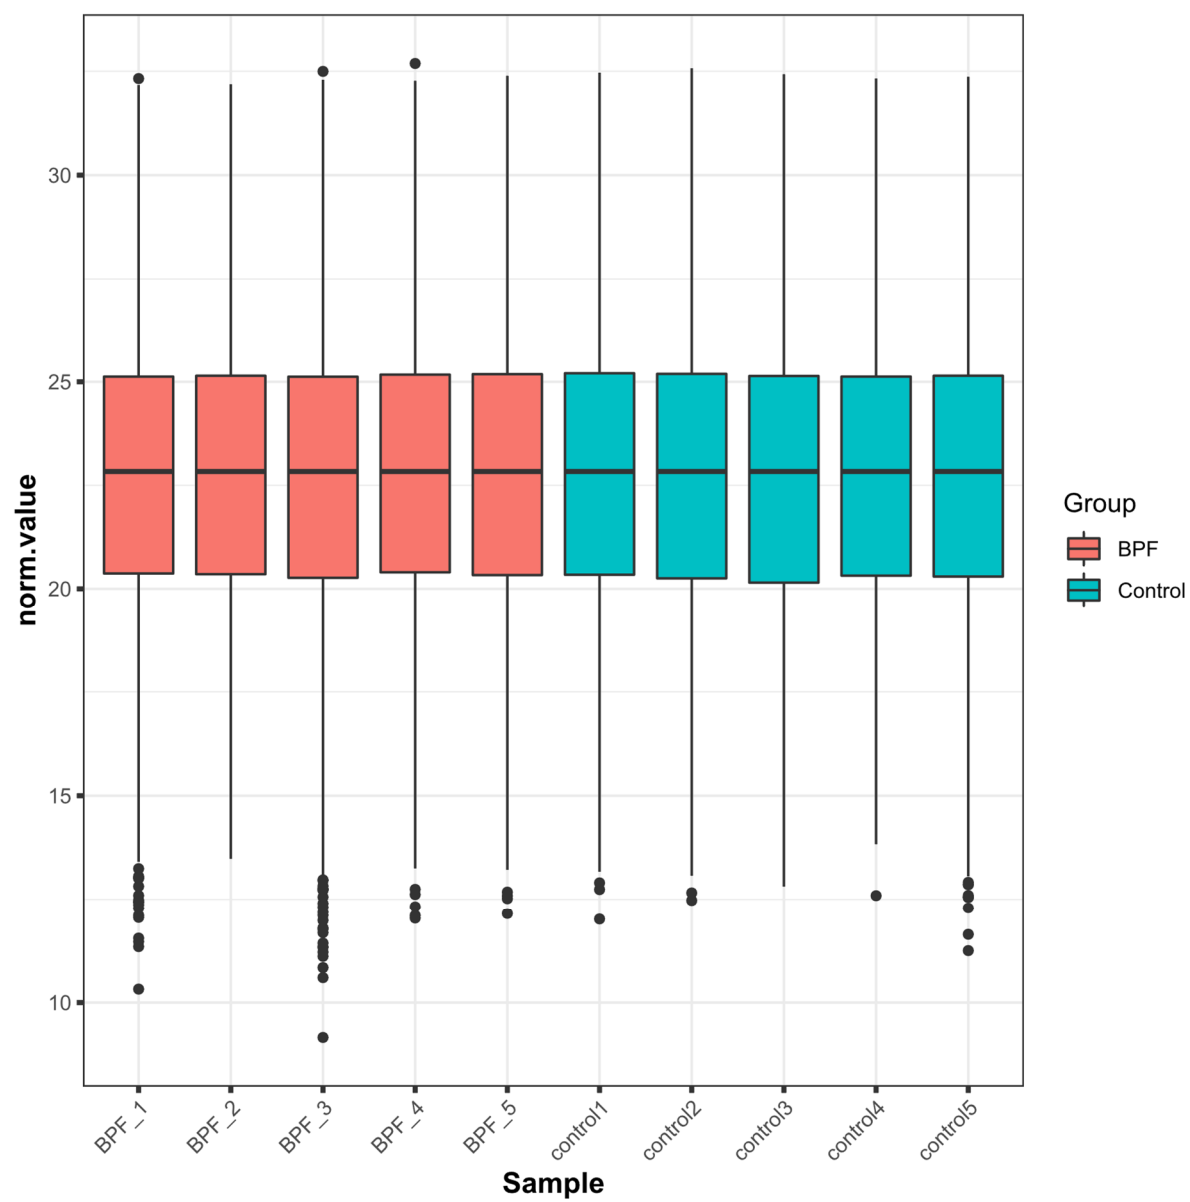

Figure S2 Boxplot of median normalized protein abundances per sample
