# Supplementary material for: Adaptation and Resistance: How Bacteroides thetaiotaomicron Copes with the Bisphenol A Substitute Bisphenol F
Source: MDPI journal article supplement (doi:10.3390/microorganisms10081610), 2022-08-09
Supplement: s1 [file s1]

## Supplementary Material Table S2: Concentration calculations bisphenols

Table S2 Characteristics of used bisphenols

| Chemical    | M [g/mol] | Solvent |
|-------------|-----------|---------|
| Bisphenol A | 228.29    | Ethanol |
| Bisphenol F | 200.24    | Ethanol |
| Bisphenol S | 250.27    | Ethanol |

Exposure concentrations for metabolomic and proteomic analysis of bisphenol F were calculated according to a 70 kg person with a daily intake of 50 µg/kg or 200 µg/kg. The average stool weight per day [1] was included in the calculations.

50 µg/kg body weight:

$$\frac{(50 \mu\text{g/kg} * 70 \text{ kg})}{123.6 \text{ g}} = 28.32 \mu\text{g/g}$$

200 µg/kg body weight:

$$\frac{(200 \mu\text{g/kg} * 70 \text{ kg})}{123.6 \text{ g}} = 113.27 \mu\text{g/g}$$

We converted µg/g of stool into mg/ml, due to our liquid cultivation in batch cultures. This lead to 0.0283 mg/ml and 0.113 mg/ml for 50 µg/kg and 200 µg/kg, respectively. Molar concentrations (mM/L) were calculated for each bisphenol according to their specific Molar mass. For bisphenol F this corresponds to 0.14 mM/L and 0.57 mM/L for 50 µg/kg and 200 µg/kg, respectively.

1. Rendtorff, R.C.; Kashgarian, M. Stool patterns of healthy adult males. *Dis Colon Rectum* **1967**, *10*, 222-228, doi:10.1007/BF02617184.
