# Supplementary material for: Adaptation and Resistance: How Bacteroides thetaiotaomicron Copes with the Bisphenol A Substitute Bisphenol F
Source: MDPI journal article supplement (doi:10.3390/microorganisms10081610), 2022-08-09
Supplement: s1 [file s1]

### Supplementary Material Table S1: Growth media (Brain-Heart-Infusion, BHI)

Cultivation of *Bacteroides thetaiotaomicron* was performed in complex Brain-Heart-Infusion (BHI) medium with supplements (see Table S1) under anaerobic conditions.

**Table S1: Recipe complex Brain-Heart-Infusion (BHI) medium with supplements**

| Ingredient               | Quantity [g or ml/l] | Supplier         |
|--------------------------|----------------------|------------------|
| Brain-heart-infusion     | 37                   | Roth             |
| L-cysteine hydrochloride | 0.5                  | Biochemica       |
| Resazurin                | 0.001                | MP biomedicals   |
| Vitamin k hemin solution | 10                   | Becton Dickinson |
| Yeast extract            | 5                    | Chemsolute       |

BHI medium was aliquoted into hungates, closed with butyl caps and immediately purged with nitrogen. Autoclaved at 121°C for 20 min and stored at 4°C until use. For growth experiments hungates were inoculated to an OD<sub>600nm</sub> of ~0.1 with freshly thawed bacterial cells. Bacteria were incubated at 37°C and 175 rpm.
