# Supplementary material for: Adaptation and Resistance: How Bacteroides thetaiotaomicron Copes with the Bisphenol A Substitute Bisphenol F
Source: MDPI journal article supplement (doi:10.3390/microorganisms10081610), 2022-08-09
Supplement: s1 [file s1]

# Supplementary Figure S1 – Diagnostics plots linear models

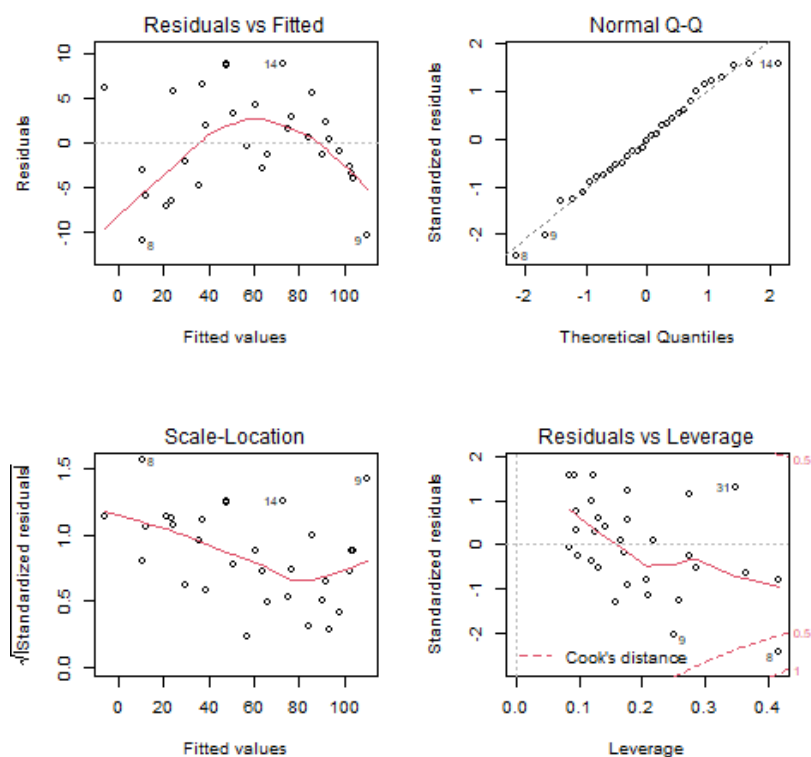

Call:

```
lm(formula = Growth ~ Concentration * Group, data = data)
```

Residuals:

|           | Min      | 1Q      | Median  | 3Q     | Max    |
|-----------|----------|---------|---------|--------|--------|
| Residuals | -11.0000 | -3.2817 | -0.2905 | 3.8348 | 8.9063 |

Coefficients:

|                        | Estimate  | Std. Error | t value | Pr(> t )     |
|------------------------|-----------|------------|---------|--------------|
| (Intercept)            | 102.6374  | 3.1425     | 32.661  | < 2e-16 ***  |
| Concentration          | -181.3878 | 9.4660     | -19.162 | < 2e-16 ***  |
| GroupBPF               | 7.6743    | 4.3053     | 1.783   | 0.0868 .     |
| GroupBPS               | 0.8626    | 4.9330     | 0.175   | 0.8626       |
| Concentration:GroupBPF | 131.7637  | 9.8481     | 13.380  | 6.74e-13 *** |
| Concentration:GroupBPS | 154.9593  | 9.6390     | 16.076  | 1.09e-14 *** |

Signif. codes: 0 '\*\*\*' 0.001 '\*\*' 0.01 '\*' 0.05 '.' 0.1 ' ' 1

Residual standard error: 5.891 on 25 degrees of freedom  
 Multiple R-squared: 0.9744, Adjusted R-squared: 0.9693  
 F-statistic: 190.5 on 5 and 25 DF, p-value: < 2.2e-16

**Figure S1** Diagnostics plot for linear model
