# Supplementary material for: Adaptation and Resistance: How Bacteroides thetaiotaomicron Copes with the Bisphenol A Substitute Bisphenol F
Source: Microorganisms. 2022 Aug 9;10(8):1610. doi: 10.3390/microorganisms10081610 (PMC9414779; doi:10.3390/microorganisms10081610)
Supplement: Supplementary file 1 [file microorganisms-10-01610-s001.zip]

Archive with 12 entries (12 files):
- Supplementary Figure S1_linear model growth rate.pdf
- Supplementary Figure S2_proteomics_median normalization.pdf
- Supplementary Figure S3_FAME BPA.pdf
- Supplementary Figure S4_FAME BPS.pdf
- Supplementary Figure S5_FAME BPF.pdf
- Supplementary Material Table S1_Growth conditions and media.pdf
- Supplementary Material Table S2_Concentration calculations bisphenols.pdf
- Supplementary Material Table S3_growth curves and rates.xlsx
- Supplementary Material Table S4_proteomics significant proteins.xlsx
- Supplementary Material Table S5_proteomics unique proteins.xlsx
- Supplementary Material Table S6_KEGG pathway analysis.xlsx
- Supplementary Material Table S7_identified proteins.xlsx
