# Supplementary material for: Adaptation and Resistance: How Bacteroides thetaiotaomicron Copes with the Bisphenol A Substitute Bisphenol F
Source: Microorganisms. 2022 Aug 9;10(8):1610. doi: 10.3390/microorganisms10081610 (PMC9414779; doi:10.3390/microorganisms10081610)
Supplement: Supplementary file 1 [file microorganisms-10-01610-s001.zip › Supplementary Material Table S3_growth curves and rates.xlsx]

## Sheet: BPA
BPA	Spectrophotometrically ascertained OD600 values								Growth rates
Concentration [mM] / Time [h]	0	1	2	2.5	3	3.5	4		Concentration [mM]	Growth rate [%]
ctrl_1	0.119	0.257	0.484	0.549	0.733	0.872	1.078		0	100
ctrl_2	0.084	0.216	0.384	0.476	0.643	0.809	1.011		0.05	94
ctrl_3	0.117	0.229	0.391	0.481	0.632	0.794	0.969		0.1	85
0.05_1	0.128	0.255	0.43	0.511	0.608	0.779	0.972		0.15	77
0.05_2	0.11	0.209	0.405	0.436	0.623	0.798	0.965		0.2	65
0.05_3	0.125	0.236	0.422	0.535	0.698	0.807	1.068		0.25	57
0.1_1	0.136	0.231	0.39	0.47	0.584	0.678	0.822		0.3	57
0.1_2	0.105	0.215	0.395	0.47	0.561	0.678	0.819		0.35	41
0.1_3	0.125	0.23	0.387	0.44	0.533	0.758	0.825		0.4	28
0.15_1	0.124	0.213	0.303	0.396	0.496	0.532	0.682		0.45	14
0.15_2	0.11	0.203	0.317	0.396	0.505	0.542	0.671		0.5	6
0.15_3	0.142	0.23	0.348	0.438	0.509	0.624	0.762		0.6	0
0.2_1	0.124	0.213	0.316	0.366	0.467	0.494	0.597		0.12	77
0.2_2	0.117	0.203	0.329	0.352	0.47	0.492	0.557		0.5	14
0.2_3	0.136	0.215	0.3	0.353	0.377	0.432	0.479
0.25_1	0.144	0.245	0.299	0.345	0.474	0.453	0.567
0.25_2	0.131	0.181	0.221	0.235	0.229	0.258	0.279
0.25_3	0.123	0.209	0.285	0.346	0.401	0.459	0.605
0.3_1	0.104	0.188	0.235	0.273	0.312	0.317	0.357
0.3_2	0.107	0.186	0.247	0.273	0.316	0.352	0.393
0.3_3	0.112	0.201	0.265	0.32	0.338	0.38	0.432
0.35_1	0.112	0.182	0.222	0.24	0.258	0.258	0.291
0.35_2	0.113	0.175	0.218	0.23	0.233	0.256	0.282
0.35_3	0.132	0.205	0.242	0.238	0.26	0.284	0.293
0.35_4	0.108	0.201	0.245	0.191	0.28	0.293	0.311
0.4_1	0.123	0.186	0.204	0.225	0.237	0.22	0.255
0.4_2	0.128	0.183	0.22	0.244	0.226	0.224	0.236
0.4_3	0.121	0.179	0.199	0.194	0.195	0.197	0.21
0.4_4	0.121	0.187	0.221	0.211	0.232	0.209	0.228
0.45_1	0.112	0.13	0.157	0.164	0.172	0.168	0.173
0.45_2	0.114	0.15	0.149	0.162	0.16	0.16	0.162
0.45_3	0.126	0.138	0.151	0.164	0.163	0.152	0.157
0.45_4	0.165	0.205	0.221	0.219	0.207	0.199	0.215
0.5_1	0.112	0.122	0.135	0.137	0.137	0.139	0.141
0.5_2	0.118	0.119	0.125	0.115	0.128	0.121	0.12
0.5_3	0.118	0.123	0.134	0.136	0.148	0.144	0.141
0.5_4	0.1	0.112	0.11	0.108	0.109	0.118	0.107
0.6_1	0.113	0.126	0.123	0.132	0.129	0.121	0.12
0.6_2	0.122	0.13	0.136	0.137	0.127	0.124	0.124
0.6_3	0.103	0.101	0.104	0.099	0.1	0.098	0.1
0.6_4	0.11	0.104	0.111	0.11	0.103	0.102	0.108
0.12_1	0.161	0.273	0.4	0.448	0.632	0.62	0.823
0.12_2	0.116	0.225	0.368	0.401	0.511	0.66	0.794
0.12_3	0.128	0.314	0.351	0.427	0.49	0.63	0.709
0.5_1	0.134	0.183	0.208	0.212	0.213	0.213	0.214
0.5_2	0.116	0.122	0.13	0.129	0.132	0.133	0.136
0.5_3	0.122	0.174	0.174	0.177	0.169	0.165	0.167
0.5_4	0.095	0.121	0.133	0.132	0.12	0.124	0.121

## Sheet: BPF
BPF	Spectrophotometrically ascertained OD600 values						Growth rates
Concentration [mM] / Time [h]	0	1	2	3	4		Concentration [mM]	Growth rate [%]
ctrl_1	0.109	0.322	0.555	0.98	1.306		0	100
ctrl_2	0.115	0.321	0.614	0.93	1.325		0.125	100
ctrl_3	0.117	0.313	0.585	0.988	1.374		0.25	97
0.125_1	0.135	0.317	0.491	0.758	1.18		0.375	94
0.125_2	0.136	0.307	0.494	0.748	1.145		0.5	91
0.125_3	0.137	0.309	0.497	0.751	1.121		0.75	82
0.25_1	0.141	0.29	0.486	0.74	1.075		1	65
0.25_2	0.15	0.31	0.51	0.746	1.071		1.25	57
0.25_3	0.145	0.297	0.482	0.708	1.063		1.5	31
0.375_1	0.137	0.313	0.471	0.692	1.025		1.75	17
0.375_2	0.13	0.313	0.483	0.743	1.032		2	8
0.375_3	0.143	0.324	0.466	0.726	1.009		0.14
0.5_1	0.136	0.303	0.474	0.689	0.99		0.57
0.5_2	0.139	0.284	0.478	0.65	0.943
0.5_3	0.137	0.291	0.442	0.654	0.91
0.75_1	0.142	0.298	0.408	0.561	0.855
0.75_2	0.136	0.267	0.419	0.589	0.793
0.75_3	0.132	0.268	0.4	0.548	0.735
1_1	0.148	0.269	0.352	0.481	0.583
1_2	0.123	0.257	0.335	0.435	0.543
1_3	0.14	0.262	0.357	0.434	0.544
1.25_1	0.143	0.23	0.313	0.391	0.504
1.25_2	0.159	0.253	0.345	0.41	0.522
1.25_3	0.149	0.218	0.271	0.333	0.384
1.5_1	0.143	0.204	0.237	0.291	0.361
1.5_2	0.142	0.218	0.264	0.305	0.337
1.5_3	0.148	0.12	0.117	0.115	0.118
1.75_1	0.164	0.225	0.241	0.253	0.279
1.75_2	0.148	0.149	0.144	0.145	0.146
1.75_3	0.161	0.183	0.184	0.178	0.176
2_1	0.147	0.19	0.197	0.192	0.21
2_2	0.149	0.185	0.19	0.201	0.187
2_3	0.15	0.122	0.115	0.11	0.107
0.14_1	0.102	0.291	0.529	0.806	1.238
0.14_2	0.111	0.29	0.531	0.826	1.275
0.14_3	0.114	0.295	0.543	0.834	1.297
0.57_1	0.116	0.254	0.415	0.578	0.863
0.57_2	0.134	0.259	0.452	0.65	0.95
0.57_3	0.129	0.262	0.444	0.661	0.931

## Sheet: BPS
BPS	Spectrophotometrically ascertained OD600 values								Growth rates
Concentration [mM] / Time [h]	0	1	2	2.5	3	3.5	3.75		Concentration [mM]	Growth rate [%]
ctrl_1	0.113	0.212	0.398	0.508	0.641	0.899	1.022		0	100
ctrl_2	0.103	0.201	0.362	0.525	0.625	0.957	1.069		0.5	89
ctrl_3	0.132	0.231	0.397	0.517	0.656	0.973	1.094		1	80
0.5_1	0.104	0.166	0.299	0.395	0.465	0.608	0.731		1.5	61
0.5_2	0.101	0.163	0.303	0.41	0.482	0.644	0.716		2	54
0.5_3	0.11	0.171	0.31	0.425	0.512	0.663	0.8		2.5	44
1_1	0.094	0.142	0.24	0.287	0.378	0.502	0.527		3	30
1_2	0.101	0.15	0.256	0.326	0.389	0.516	0.624		3.5	0
1_3	0.101	0.157	0.283	0.347	0.378	0.536	0.571		4	/
1.5_1	0.099	0.14	0.221	0.261	0.313	0.392	0.403		4.5	/
1.5_2	0.11	0.14	0.227	0.277	0.3	0.378	0.424		5	/
1.5_3	0.107	0.146	0.22	0.306	0.291	0.393	0.397		6	/
2_1	0.103	0.141	0.194	0.241	0.275	0.324	0.349		0.11	98
2_2	0.108	0.139	0.225	0.241	0.269	0.319	0.345		0.45	86
2_3	0.106	0.148	0.191	0.234	0.266	0.324	0.356
2.5_1	0.105	0.137	0.167	0.196	0.225	0.261	0.277
2.5_2	0.107	0.139	0.164	0.233	0.244	0.275	0.291
2.5_3	0.106	0.14	0.174	0.203	0.224	0.272	0.282
3_1	0.095	0.151	0.138	0.152	0.165	0.189	0.196
3_2	0.11	0.135	0.153	0.176	0.191	0.205	0.218
3_3	0.107	0.139	0.143	0.165	0.162	0.197	0.193
3_4	0.099	0.128	0.154	0.157	0.172	0.192	0.195
3.5_1	0.089	0.109	0.131	0.139	0.14	0.15	0.2
3.5_2	0.13	0.143	0.083	0.082	0.084	0.081	0.081
3.5_3	0.119	0.094	0.098	0.099	0.1	0.104	0.104
3.5_4	0.093	0.1	0.134	0.123	0.129	0.138	0.134
4_1	0.103	0.086	0.079	0.077	0.081	0.078	0.08
4 _2	0.107	0.107	0.075	0.079	0.08	0.076	0.074
4_3	0.113	0.109	0.096	0.088	0.087	0.096	0.084
4_4	0.128	0.115	0.103	0.096	0.094	0.092	0.093
4.5_1	0.186	0.179	0.143	0.14	0.145	0.146	0.143
4.5_2	0.125	0.095	0.082	0.081	0.08	0.08	0.081
4.5_3	0.11	0.099	0.088	0.078	0.082	0.08	0.08
4.5_4	0.146	0.094	0.087	0.094	0.077	0.077	0.075
5_1	0.124	0.103	0.092	0.092	0.1	0.095	0.093
5_2	0.126	0.082	0.077	0.081	0.08	0.082	0.08
5_3	0.128	0.1	0.092	0.095	0.088	0.093	0.089
5_4	0.148	0.104	0.106	0.103	0.094	0.096	0.101
6_1	0.195	0.119	0.107	0.1	0.084	0.108	0.094
6_2	0.151	0.112	0.097	0.092	0.096	0.093	0.1
6_3	0.174	0.126	0.113	0.102	0.104	0.115	0.095
6_4	0.141	0.135	0.102	0.102	0.094	0.096	0.093
0.11_1	0.121	0.196	0.36	0.49	0.606	0.854	0.988
0.11_2	0.111	0.217	0.344	0.466	0.592	0.941	0.973
0.11_3	0.096	0.178	0.333	0.441	0.589	0.802	0.89
0.45_1	0.101	0.155	0.281	0.36	0.426	0.591	0.654
0.45_2	0.099	0.173	0.282	0.373	0.439	0.6	0.668
0.45_3	0.091	0.148	0.267	0.301	0.435	0.577	0.643
