# Supplementary material for: Adaptation and Resistance: How Bacteroides thetaiotaomicron Copes with the Bisphenol A Substitute Bisphenol F
Source: Microorganisms. 2022 Aug 9;10(8):1610. doi: 10.3390/microorganisms10081610 (PMC9414779; doi:10.3390/microorganisms10081610)
Supplement: Supplementary file 1 [file microorganisms-10-01610-s001.zip › Supplementary Material Table S4_proteomics significant proteins.xlsx]

## Sheet: Protein abundances raw
Accession	Description	BPF_1	BPF_2	BPF_3	BPF_4	BPF_5	control1	control2	control3	control4	control5
Q8A470	DNA-directed RNA polymerase subunit beta' OS=Bacteroides thetaiotaomicron (strain ATCC 29148 / DSM 2079 / NCTC 10582 / E50 / VPI-5482) OX=226186 GN=rpoC PE=3 SV=1	1258599765	1323107754	1212217617	1130378278	1158552109	1516286893	1376222763	1284928461	1610236558	1389621466
Q89ZN2	30S ribosomal protein S1 OS=Bacteroides thetaiotaomicron (strain ATCC 29148 / DSM 2079 / NCTC 10582 / E50 / VPI-5482) OX=226186 GN=BT_4345 PE=4 SV=1	1728430978	1700144381	1569824357	1273516043	1739108718	2295622141	2001234835	2127619332	2240735689	2038283036
Q8A6X8	Pyruvate-flavodoxin oxidoreductase OS=Bacteroides thetaiotaomicron (strain ATCC 29148 / DSM 2079 / NCTC 10582 / E50 / VPI-5482) OX=226186 GN=BT_1747 PE=3 SV=1	9.42393e+08	1022089339	8.74163e+08	8.2469e+08	8.70048e+08	1133127067	9.76145e+08	1001975321	1205067684	1019225103
Q8A469	DNA-directed RNA polymerase subunit beta OS=Bacteroides thetaiotaomicron (strain ATCC 29148 / DSM 2079 / NCTC 10582 / E50 / VPI-5482) OX=226186 GN=rpoB PE=3 SV=1	8.19255e+08	8.89385e+08	7.39604e+08	7.30581e+08	742846084	1115778455	1004962801	8.86545e+08	1102281699	8.8087e+08
Q8A6Z2	Phosphoribosylformylglycinamidine synthase OS=Bacteroides thetaiotaomicron (strain ATCC 29148 / DSM 2079 / NCTC 10582 / E50 / VPI-5482) OX=226186 GN=purL PE=3 SV=1	7.67671e+08	7.52537e+08	7.41502e+08	639370923	6.21358e+08	8.50415e+08	8.41847e+08	7.12305e+08	8.52657e+08	8.8189e+08
Q8A688	Anaerobic ribonucleoside-triphosphate reductase OS=Bacteroides thetaiotaomicron (strain ATCC 29148 / DSM 2079 / NCTC 10582 / E50 / VPI-5482) OX=226186 GN=BT_1998 PE=4 SV=1	8.88864e+08	8.58013e+08	7.38802e+08	7.24285e+08	7.92086e+08	1459651266	1291878042	1173193754	1542078962	1412369298
Q8A414	Phosphoenolpyruvate carboxykinase (ATP) OS=Bacteroides thetaiotaomicron (strain ATCC 29148 / DSM 2079 / NCTC 10582 / E50 / VPI-5482) OX=226186 GN=pckA PE=3 SV=1	5151723727	5342316436	5257048851	4333784830	4767011932	5782733465	4315057760	4441577940	5664227862	4823556319
Q8A9K9	Isoleucine--tRNA ligase OS=Bacteroides thetaiotaomicron (strain ATCC 29148 / DSM 2079 / NCTC 10582 / E50 / VPI-5482) OX=226186 GN=ileS PE=3 SV=1	6.95687e+08	7.07643e+08	6.20565e+08	6.39524e+08	6.11575e+08	7.33386e+08	6.85218e+08	6.17688e+08	7.69377e+08	6.49593e+08
Q89YJ3	Formate C-acetyltransferase OS=Bacteroides thetaiotaomicron (strain ATCC 29148 / DSM 2079 / NCTC 10582 / E50 / VPI-5482) OX=226186 GN=BT_4738 PE=3 SV=1	1331117384	1263895984	1231944168	1094687370	1067500583	1709167244	1848382840	1540899781	1843448584	1937151214
Q8A881	Alpha-glucan phosphorylase OS=Bacteroides thetaiotaomicron (strain ATCC 29148 / DSM 2079 / NCTC 10582 / E50 / VPI-5482) OX=226186 GN=BT_1293 PE=3 SV=1	8.57197e+08	1003288784	8.4754e+08	8.30407e+08	8.72143e+08	9.38125e+08	833573959	7.42195e+08	9.22504e+08	7.68738e+08
Q8A105	Carbamoyl-phosphate synthase (glutamine-hydrolyzing) OS=Bacteroides thetaiotaomicron (strain ATCC 29148 / DSM 2079 / NCTC 10582 / E50 / VPI-5482) OX=226186 GN=BT_3866 PE=3 SV=1	9.38777e+08	9.84033e+08	9.16746e+08	8.63085e+08	8.63058e+08	1178414701	1078756154	9.95445e+08	1235027173	9.74558e+08
Q8A463	Elongation factor Tu OS=Bacteroides thetaiotaomicron (strain ATCC 29148 / DSM 2079 / NCTC 10582 / E50 / VPI-5482) OX=226186 GN=tuf PE=3 SV=1	5732200972	5575265359	6042775771	5763963994	5072782168	6227579739	6262895364	5304595791	6277319042	5546808491
Q8A6P8	60 kDa chaperonin OS=Bacteroides thetaiotaomicron (strain ATCC 29148 / DSM 2079 / NCTC 10582 / E50 / VPI-5482) OX=226186 GN=groL PE=3 SV=1	1833709249	1790616174	1762671091	1418379298	1596931575	1574573036	1599991444	1410118354	1564062311	1547985255
Q8A474	Elongation factor G OS=Bacteroides thetaiotaomicron (strain ATCC 29148 / DSM 2079 / NCTC 10582 / E50 / VPI-5482) OX=226186 GN=fusA PE=3 SV=1	2088535359	2101570853	2096874828	1595263413	1851172497	2638539996	2294629069	2318370485	2666174389	2516368541
Q89YW6	Chaperone protein DnaK OS=Bacteroides thetaiotaomicron (strain ATCC 29148 / DSM 2079 / NCTC 10582 / E50 / VPI-5482) OX=226186 GN=dnaK PE=3 SV=1	1582038351	1466760647	1559648430	1311397311	1231618269	1155672313	1204340200	1018351111	1215262606	1043986750
Q89ZL5	Protein translocase subunit SecA OS=Bacteroides thetaiotaomicron (strain ATCC 29148 / DSM 2079 / NCTC 10582 / E50 / VPI-5482) OX=226186 GN=secA PE=3 SV=1	4.67481e+08	469884897	4.43311e+08	4.02976e+08	3.95581e+08	4.16242e+08	4.31931e+08	3.49079e+08	4.40909e+08	4.01068e+08
Q8A4N6	Polyribonucleotide nucleotidyltransferase OS=Bacteroides thetaiotaomicron (strain ATCC 29148 / DSM 2079 / NCTC 10582 / E50 / VPI-5482) OX=226186 GN=pnp PE=3 SV=1	1209573127	1222045803	1199216290	1030772664	1165794199	1422804140	1316725993	1240959785	1436458416	1216104194
Q8A3A0	Succinate dehydrogenase flavoprotein subunit OS=Bacteroides thetaiotaomicron (strain ATCC 29148 / DSM 2079 / NCTC 10582 / E50 / VPI-5482) OX=226186 GN=BT_3054 PE=4 SV=1	1378948354	1499169688	1140240948	1089475892	1354211506	1723205837	1347225056	1502019505	1630062032	1353822347
Q8A0M6	Alanine--tRNA ligase OS=Bacteroides thetaiotaomicron (strain ATCC 29148 / DSM 2079 / NCTC 10582 / E50 / VPI-5482) OX=226186 GN=alaS PE=3 SV=1	4.08766e+08	5.37322e+08	3.52439e+08	3.38298e+08	4.47851e+08	5.86473e+08	6.32309e+08	5.50465e+08	6.00302e+08	4.35842e+08
Q8A2A1	Translation initiation factor IF-2 OS=Bacteroides thetaiotaomicron (strain ATCC 29148 / DSM 2079 / NCTC 10582 / E50 / VPI-5482) OX=226186 GN=infB PE=3 SV=1	3.16373e+08	3.36577e+08	3.10064e+08	2.63791e+08	3.74238e+08	5.32752e+08	3.48238e+08	4.4709e+08	4.03181e+08	3.71242e+08
Q89ZV8	Glyceraldehyde-3-phosphate dehydrogenase OS=Bacteroides thetaiotaomicron (strain ATCC 29148 / DSM 2079 / NCTC 10582 / E50 / VPI-5482) OX=226186 GN=BT_4263 PE=3 SV=1	3342689207	4171238006	3101938812	3235289394	3894112771	4710050773	3755796265	3847121378	4682847437	3176497999
Q8A7C9	Transcription termination factor Rho OS=Bacteroides thetaiotaomicron (strain ATCC 29148 / DSM 2079 / NCTC 10582 / E50 / VPI-5482) OX=226186 GN=rho PE=3 SV=1	172151532	216146496	1.8369e+08	1.47878e+08	1.67381e+08	2.45246e+08	2.6644e+08	2.1969e+08	2.78468e+08	208187944
Q8A3M1	Methionine--tRNA ligase OS=Bacteroides thetaiotaomicron (strain ATCC 29148 / DSM 2079 / NCTC 10582 / E50 / VPI-5482) OX=226186 GN=metG PE=3 SV=1	3.33389e+08	3.03107e+08	293151212	2.69018e+08	2.76507e+08	3.53985e+08	3.13274e+08	2.8909e+08	3.3159e+08	2.67839e+08
Q8AB05	Pyrophosphate--fructose 6-phosphate 1-phosphotransferase OS=Bacteroides thetaiotaomicron (strain ATCC 29148 / DSM 2079 / NCTC 10582 / E50 / VPI-5482) OX=226186 GN=pfp PE=3 SV=1	1319375274	1190725591	1129805248	1058001341	1211581846	1623557463	1426065985	1507477561	1681818837	1577434654
Q8AA39	Phenylalanine--tRNA ligase beta subunit OS=Bacteroides thetaiotaomicron (strain ATCC 29148 / DSM 2079 / NCTC 10582 / E50 / VPI-5482) OX=226186 GN=pheT PE=3 SV=1	4.20066e+08	4.54522e+08	3.95134e+08	3.22427e+08	3.64534e+08	4.55869e+08	4.17929e+08	3.74162e+08	4.70977e+08	4.20124e+08
Q8A0Z3	Elongation factor Ts OS=Bacteroides thetaiotaomicron (strain ATCC 29148 / DSM 2079 / NCTC 10582 / E50 / VPI-5482) OX=226186 GN=tsf PE=3 SV=1	1691088589	1624150991	1702332842	1373002144	1469319058	1861489688	1846735604	1723173199	1899428727	1939238541
Q89YY3	Chaperone protein ClpB OS=Bacteroides thetaiotaomicron (strain ATCC 29148 / DSM 2079 / NCTC 10582 / E50 / VPI-5482) OX=226186 GN=clpB PE=3 SV=1	2.28099e+08	2.45074e+08	2.16912e+08	1.92106e+08	1.98286e+08	1.8303e+08	1.81579e+08	1.56888e+08	192983267	1.61377e+08
Q8ABD7	Uncharacterized protein OS=Bacteroides thetaiotaomicron (strain ATCC 29148 / DSM 2079 / NCTC 10582 / E50 / VPI-5482) OX=226186 GN=BT_0173 PE=4 SV=1	1502145916	1591057148	1301920316	1265591610	1578183016	1811565893	1568814442	1638564791	1832877626	1349362179
Q8AAW5	Transketolase OS=Bacteroides thetaiotaomicron (strain ATCC 29148 / DSM 2079 / NCTC 10582 / E50 / VPI-5482) OX=226186 GN=BT_0347 PE=3 SV=1	5.79013e+08	5.21662e+08	4.82489e+08	4.5491e+08	4.12627e+08	5.52581e+08	5.40951e+08	443299458	5.94257e+08	6.15609e+08
Q8A130	FKBP-type peptidyl-prolyl cis-transisomerase (Trigger factor) OS=Bacteroides thetaiotaomicron (strain ATCC 29148 / DSM 2079 / NCTC 10582 / E50 / VPI-5482) OX=226186 GN=BT_3841 PE=4 SV=1	991223024	1115136088	1028360229	7.9921e+08	9.87873e+08	1411910422	1320596248	1268888950	1473810589	1194403512
Q8A753	Phosphoglycerate kinase OS=Bacteroides thetaiotaomicron (strain ATCC 29148 / DSM 2079 / NCTC 10582 / E50 / VPI-5482) OX=226186 GN=pgk PE=3 SV=1	1368521044	1488874917	1306228340	1303547154	1428041366	1577753202	1237210624	1296703684	1665907368	1389051247
Q8A3W0	TPR domain protein OS=Bacteroides thetaiotaomicron (strain ATCC 29148 / DSM 2079 / NCTC 10582 / E50 / VPI-5482) OX=226186 GN=BT_2844 PE=4 SV=1	5.22204e+08	5.71032e+08	4.11351e+08	4.6669e+08	6.45306e+08	6.39272e+08	4.4751e+08	6.30661e+08	713019243	3.40355e+08
Q8A2E7	3-oxoacyl-[acyl-carrier-protein] synthase 2 OS=Bacteroides thetaiotaomicron (strain ATCC 29148 / DSM 2079 / NCTC 10582 / E50 / VPI-5482) OX=226186 GN=BT_3358 PE=3 SV=1	4.88061e+08	5.29742e+08	5.09785e+08	3.85649e+08	4.4768e+08	5.98225e+08	5.55567e+08	5.06629e+08	6.7114e+08	6.02131e+08
Q89ZM4	Valine--tRNA ligase OS=Bacteroides thetaiotaomicron (strain ATCC 29148 / DSM 2079 / NCTC 10582 / E50 / VPI-5482) OX=226186 GN=valS PE=3 SV=1	2.69938e+08	2.89235e+08	2.49451e+08	2.17378e+08	2.48774e+08	3.60899e+08	3.46044e+08	3.28904e+08	355986219	3.45212e+08
Q8A9B8	Chaperone protein HtpG OS=Bacteroides thetaiotaomicron (strain ATCC 29148 / DSM 2079 / NCTC 10582 / E50 / VPI-5482) OX=226186 GN=htpG PE=3 SV=1	4.94689e+08	5.32693e+08	5.26366e+08	4.04827e+08	4.81639e+08	5.06438e+08	4.04092e+08	4.47862e+08	5.12505e+08	4.36937e+08
Q8A7H6	Phosphoglucomutase phosphomannomutase OS=Bacteroides thetaiotaomicron (strain ATCC 29148 / DSM 2079 / NCTC 10582 / E50 / VPI-5482) OX=226186 GN=BT_1548 PE=3 SV=1	3.46655e+08	3.49273e+08	3.37769e+08	2.80822e+08	3.3315e+08	4.66008e+08	3.33477e+08	3.71988e+08	4.51205e+08	3.70932e+08
Q8A287	2,3-bisphosphoglycerate-independent phosphoglycerate mutase OS=Bacteroides thetaiotaomicron (strain ATCC 29148 / DSM 2079 / NCTC 10582 / E50 / VPI-5482) OX=226186 GN=gpmI PE=3 SV=1	6.64577e+08	6.82716e+08	624176019	5.34759e+08	5.7923e+08	6.35638e+08	5.60175e+08	5.39298e+08	6.58397e+08	6.57443e+08
Q8A5W2	Glucose-6-phosphate isomerase OS=Bacteroides thetaiotaomicron (strain ATCC 29148 / DSM 2079 / NCTC 10582 / E50 / VPI-5482) OX=226186 GN=pgi PE=1 SV=1	3.42668e+08	4.79615e+08	3.74756e+08	289157426	3.61616e+08	5.25725e+08	3.85263e+08	3.92651e+08	5.46606e+08	385227176
Q8A277	DNA gyrase subunit B OS=Bacteroides thetaiotaomicron (strain ATCC 29148 / DSM 2079 / NCTC 10582 / E50 / VPI-5482) OX=226186 GN=gyrB PE=3 SV=1	2.36308e+08	2.50237e+08	1.92699e+08	1.77968e+08	2.07504e+08	3.11252e+08	2.81577e+08	2.73879e+08	3.30555e+08	2.81718e+08
Q8A329	Leucine--tRNA ligase OS=Bacteroides thetaiotaomicron (strain ATCC 29148 / DSM 2079 / NCTC 10582 / E50 / VPI-5482) OX=226186 GN=leuS PE=3 SV=1	2.35181e+08	2.43447e+08	2.08657e+08	2.02667e+08	2.21822e+08	2.62054e+08	2.26263e+08	2.2201e+08	2.73703e+08	2.026e+08
Q8A1P8	Glycine--tRNA ligase OS=Bacteroides thetaiotaomicron (strain ATCC 29148 / DSM 2079 / NCTC 10582 / E50 / VPI-5482) OX=226186 GN=glyQS PE=3 SV=1	3.23913e+08	3.37543e+08	2.79178e+08	2.87513e+08	2.85953e+08	3.51397e+08	3.01579e+08	2.91483e+08	3.49976e+08	3.14876e+08
Q8A7J8	Myo-inositol-1-phosphate synthase OS=Bacteroides thetaiotaomicron (strain ATCC 29148 / DSM 2079 / NCTC 10582 / E50 / VPI-5482) OX=226186 GN=BT_1526 PE=3 SV=1	4.13851e+08	5.11085e+08	3.95403e+08	3.85348e+08	4.15106e+08	3.86866e+08	3.55259e+08	2.9981e+08	3.67902e+08	2.97597e+08
Q8A9B5	Putative tetratricopeptide repeat family protein OS=Bacteroides thetaiotaomicron (strain ATCC 29148 / DSM 2079 / NCTC 10582 / E50 / VPI-5482) OX=226186 GN=BT_0900 PE=4 SV=1	8.82479e+08	8.62979e+08	7.50012e+08	670026197	8.03328e+08	1022358079	7.92559e+08	8.88816e+08	1013624662	7.0543e+08
Q8A3X7	DNA topoisomerase 1 OS=Bacteroides thetaiotaomicron (strain ATCC 29148 / DSM 2079 / NCTC 10582 / E50 / VPI-5482) OX=226186 GN=topA PE=3 SV=1	1.86095e+08	213764814	1.86322e+08	172148258	1.87085e+08	1.8367e+08	193709502	1.63853e+08	1.98069e+08	1.83714e+08
Q8A8K7	Na(+)-translocating NADH-quinone reductase subunit A OS=Bacteroides thetaiotaomicron (strain ATCC 29148 / DSM 2079 / NCTC 10582 / E50 / VPI-5482) OX=226186 GN=nqrA PE=3 SV=1	533994473	6.80287e+08	5.91209e+08	6.18415e+08	618429564	8.35966e+08	7.66008e+08	6.99467e+08	8.36757e+08	5.84658e+08
Q89ZR6	NADPH-dependent glutamate synthase small chain OS=Bacteroides thetaiotaomicron (strain ATCC 29148 / DSM 2079 / NCTC 10582 / E50 / VPI-5482) OX=226186 GN=BT_4310 PE=4 SV=1	2.00211e+08	2.04235e+08	184142717	1.61281e+08	1.69258e+08	2.36218e+08	2.84397e+08	2.07067e+08	2.48234e+08	2.58478e+08
Q89ZK6	Peptidyl-prolyl cis-trans isomerase OS=Bacteroides thetaiotaomicron (strain ATCC 29148 / DSM 2079 / NCTC 10582 / E50 / VPI-5482) OX=226186 GN=BT_4371 PE=4 SV=1	4.72909e+08	5.01853e+08	4.66173e+08	4.39855e+08	4.80499e+08	5.23562e+08	5.05599e+08	4.96359e+08	5.25623e+08	4.77536e+08
Q8A126	Inosine-5'-monophosphate dehydrogenase OS=Bacteroides thetaiotaomicron (strain ATCC 29148 / DSM 2079 / NCTC 10582 / E50 / VPI-5482) OX=226186 GN=guaB PE=3 SV=1	4.29994e+08	4.7043e+08	3.99232e+08	3.4858e+08	4.08671e+08	6.14531e+08	5.41963e+08	5.35857e+08	6.55538e+08	5.60521e+08
Q8A5W4	Lysine--tRNA ligase OS=Bacteroides thetaiotaomicron (strain ATCC 29148 / DSM 2079 / NCTC 10582 / E50 / VPI-5482) OX=226186 GN=lysS PE=3 SV=1	2.51084e+08	2.59455e+08	234312957	2.09889e+08	259568978	3.74008e+08	3.1915e+08	3.26619e+08	3.56159e+08	2.97907e+08
Q8ABD6	Uncharacterized protein OS=Bacteroides thetaiotaomicron (strain ATCC 29148 / DSM 2079 / NCTC 10582 / E50 / VPI-5482) OX=226186 GN=BT_0174 PE=4 SV=1	1762866075	1700682568	1558400178	1311331366	1431912955	1620027565	1479428443	1310117605	1796449525	1676087915
Q8AAP2	Threonine--tRNA ligase OS=Bacteroides thetaiotaomicron (strain ATCC 29148 / DSM 2079 / NCTC 10582 / E50 / VPI-5482) OX=226186 GN=thrS PE=3 SV=1	4.79397e+08	5.21283e+08	4.68504e+08	4.29655e+08	4.33727e+08	4.91735e+08	5.28868e+08	4.25682e+08	5.03658e+08	4.14979e+08
Q8A5H1	SusC homolog OS=Bacteroides thetaiotaomicron (strain ATCC 29148 / DSM 2079 / NCTC 10582 / E50 / VPI-5482) OX=226186 GN=BT_2268 PE=3 SV=1	1.33273e+08	1.54716e+08	131779965	1.19178e+08	1.48169e+08	2.04732e+08	1.79311e+08	2.06006e+08	2.50824e+08	1.68591e+08
Q8A378	Ribonuclease R OS=Bacteroides thetaiotaomicron (strain ATCC 29148 / DSM 2079 / NCTC 10582 / E50 / VPI-5482) OX=226186 GN=rnr PE=3 SV=1	1.32581e+08	1.28273e+08	1.21869e+08	1.0505e+08	1.11282e+08	1.45836e+08	1.30325e+08	129802693	1.54251e+08	1.44657e+08
Q8A5I3	Fumarate hydratase class I OS=Bacteroides thetaiotaomicron (strain ATCC 29148 / DSM 2079 / NCTC 10582 / E50 / VPI-5482) OX=226186 GN=BT_2256 PE=3 SV=1	7.12814e+08	7.03264e+08	6.76681e+08	6.01183e+08	5.85588e+08	6.85101e+08	6.3291e+08	5.63127e+08	7.27091e+08	7.25694e+08
Q8A0W0	Malate dehydrogenase OS=Bacteroides thetaiotaomicron (strain ATCC 29148 / DSM 2079 / NCTC 10582 / E50 / VPI-5482) OX=226186 GN=mdh PE=3 SV=1	1641127718	1601636902	1636686758	1399426239	1426437286	1540569798	1473670655	1259729750	1722756870	1368844901
Q89ZK9	TPR_REGION domain-containing protein OS=Bacteroides thetaiotaomicron (strain ATCC 29148 / DSM 2079 / NCTC 10582 / E50 / VPI-5482) OX=226186 GN=BT_4368 PE=4 SV=1	7.56807e+08	8.42594e+08	7.79059e+08	7.80745e+08	7.36733e+08	8.45302e+08	8.75321e+08	7.25041e+08	8.74439e+08	7.0904e+08
Q8A0Z4	30S ribosomal protein S2 OS=Bacteroides thetaiotaomicron (strain ATCC 29148 / DSM 2079 / NCTC 10582 / E50 / VPI-5482) OX=226186 GN=rpsB PE=3 SV=1	9.88292e+08	1368934756	902354789	8.97406e+08	1028149826	1265595251	1345684473	1232145520	1266029155	9.3794e+08
Q8A3W3	Pyruvate kinase OS=Bacteroides thetaiotaomicron (strain ATCC 29148 / DSM 2079 / NCTC 10582 / E50 / VPI-5482) OX=226186 GN=BT_2841 PE=3 SV=1	3.70531e+08	3.96689e+08	3.6204e+08	3.45491e+08	3.6647e+08	495540434	4.68513e+08	4.26095e+08	4.90312e+08	375687508
Q8A3Y8	TPR domain-containing protein OS=Bacteroides thetaiotaomicron (strain ATCC 29148 / DSM 2079 / NCTC 10582 / E50 / VPI-5482) OX=226186 GN=BT_2816 PE=4 SV=1	1.01947e+08	1.03806e+08	8.8651e+07	8.53757e+07	8.65472e+07	8.75502e+07	7.64357e+07	7.1723e+07	9.19049e+07	8.11125e+07
Q8A734	Fructose-bisphosphate aldolase OS=Bacteroides thetaiotaomicron (strain ATCC 29148 / DSM 2079 / NCTC 10582 / E50 / VPI-5482) OX=226186 GN=BT_1691 PE=4 SV=1	3533358350	3186425909	2931486651	2747602484	2510836124	2875733646	2894591560	2628182492	3041101402	3411983711
Q8A6G9	Biotin carboxylase OS=Bacteroides thetaiotaomicron (strain ATCC 29148 / DSM 2079 / NCTC 10582 / E50 / VPI-5482) OX=226186 GN=BT_1915 PE=4 SV=1	386079672	4.01268e+08	3.60358e+08	2.96015e+08	3.23421e+08	367906979	3.82515e+08	318613834	3.91951e+08	377067347
Q8A9B6	DNA gyrase subunit A OS=Bacteroides thetaiotaomicron (strain ATCC 29148 / DSM 2079 / NCTC 10582 / E50 / VPI-5482) OX=226186 GN=gyrA PE=3 SV=1	2.55629e+08	2.61315e+08	2.22895e+08	2.13984e+08	2.12383e+08	2.87757e+08	3.07334e+08	2.68442e+08	2.88226e+08	2.98587e+08
Q8A5T0	Putative dehydrogenase OS=Bacteroides thetaiotaomicron (strain ATCC 29148 / DSM 2079 / NCTC 10582 / E50 / VPI-5482) OX=226186 GN=BT_2158 PE=4 SV=1	263084855	242689712	2.22446e+08	2.01708e+08	1.89737e+08	2.59869e+08	2.80089e+08	2.02938e+08	2.66796e+08	307735548
Q8A988	Proline--tRNA ligase OS=Bacteroides thetaiotaomicron (strain ATCC 29148 / DSM 2079 / NCTC 10582 / E50 / VPI-5482) OX=226186 GN=proS PE=3 SV=1	3.29804e+08	3.06452e+08	3.15281e+08	2.63502e+08	3.40433e+08	4.46905e+08	3.83604e+08	3.93121e+08	435766940	3.82027e+08
Q8A9E3	Aspartate--tRNA ligase OS=Bacteroides thetaiotaomicron (strain ATCC 29148 / DSM 2079 / NCTC 10582 / E50 / VPI-5482) OX=226186 GN=aspS PE=3 SV=1	3.05629e+08	3.4369e+08	2.82624e+08	2.46541e+08	3.04873e+08	4.16424e+08	3.44228e+08	3.04656e+08	3.73238e+08	3.03706e+08
Q8A875	V-type ATP synthase alpha chain OS=Bacteroides thetaiotaomicron (strain ATCC 29148 / DSM 2079 / NCTC 10582 / E50 / VPI-5482) OX=226186 GN=atpA PE=3 SV=1	1.3514e+08	1.6519e+08	144637863	1.26284e+08	1.33563e+08	1.12872e+08	1.1192e+08	9.14785e+07	1.25296e+08	8.58946e+07
Q8A100	Adenylosuccinate lyase OS=Bacteroides thetaiotaomicron (strain ATCC 29148 / DSM 2079 / NCTC 10582 / E50 / VPI-5482) OX=226186 GN=BT_3871 PE=3 SV=1	2.18182e+08	2.49485e+08	2.06038e+08	1.841e+08	183986369	2.82688e+08	2.16089e+08	2.25845e+08	2.88041e+08	1.96728e+08
Q8A4A2	DNA-directed RNA polymerase subunit alpha OS=Bacteroides thetaiotaomicron (strain ATCC 29148 / DSM 2079 / NCTC 10582 / E50 / VPI-5482) OX=226186 GN=rpoA PE=3 SV=1	6.01152e+08	6.71654e+08	5.9856e+08	5.4193e+08	5.51762e+08	7.45365e+08	7.00661e+08	5.71646e+08	7.67786e+08	6.64466e+08
Q89ZN8	Glutamine synthetase OS=Bacteroides thetaiotaomicron (strain ATCC 29148 / DSM 2079 / NCTC 10582 / E50 / VPI-5482) OX=226186 GN=BT_4339 PE=3 SV=1	1.09719e+08	1.20039e+08	1.04801e+08	9.14116e+07	9.53646e+07	1.43334e+08	1.38975e+08	1.18179e+08	1.38039e+08	1.27713e+08
Q8A0I0	Uncharacterized protein OS=Bacteroides thetaiotaomicron (strain ATCC 29148 / DSM 2079 / NCTC 10582 / E50 / VPI-5482) OX=226186 GN=BT_4041 PE=4 SV=1	1.05631e+08	1.1443e+08	1.03165e+08	7.70676e+07	1.00823e+08	1.24831e+08	1.14069e+08	115352213	1.23023e+08	1.10744e+08
Q8A6C9	Putative cell wall biogenesis protein OS=Bacteroides thetaiotaomicron (strain ATCC 29148 / DSM 2079 / NCTC 10582 / E50 / VPI-5482) OX=226186 GN=BT_1955 PE=4 SV=1	1.98419e+08	2.01861e+08	1.97115e+08	1.72554e+08	1.78758e+08	2.90073e+08	2.97476e+08	2.54788e+08	3.25863e+08	3.00847e+08
P94598	Glutamate dehydrogenase OS=Bacteroides thetaiotaomicron (strain ATCC 29148 / DSM 2079 / NCTC 10582 / E50 / VPI-5482) OX=226186 GN=gdhA PE=3 SV=2	4.12578e+08	4.67191e+08	3.66283e+08	3.65634e+08	5.03349e+08	7.11612e+08	6.23637e+08	651722672	6.65377e+08	5.23089e+08
Q8A3X5	Arginine--tRNA ligase OS=Bacteroides thetaiotaomicron (strain ATCC 29148 / DSM 2079 / NCTC 10582 / E50 / VPI-5482) OX=226186 GN=argS PE=3 SV=1	2.17023e+08	2.12739e+08	1.9897e+08	1.85662e+08	1.98929e+08	2.30377e+08	2.2141e+08	1.98446e+08	2.2535e+08	1.91471e+08
Q8A525	Putative GMP synthase [glutamine-hydrolyzing] 2 OS=Bacteroides thetaiotaomicron (strain ATCC 29148 / DSM 2079 / NCTC 10582 / E50 / VPI-5482) OX=226186 GN=guaA2 PE=5 SV=1	248297914	268112391	2.24662e+08	2.03303e+08	2.0167e+08	2.36692e+08	2.32668e+08	1.85309e+08	2.36921e+08	2.11432e+08
Q8A127	DNA helicase OS=Bacteroides thetaiotaomicron (strain ATCC 29148 / DSM 2079 / NCTC 10582 / E50 / VPI-5482) OX=226186 GN=BT_3844 PE=3 SV=1	1.53381e+08	1.59941e+08	1.35931e+08	1.2731e+08	1.27408e+08	1.48563e+08	143223820	1.30734e+08	160950116	1.55996e+08
Q8A6G7	Propionyl-CoA carboxylase beta chain OS=Bacteroides thetaiotaomicron (strain ATCC 29148 / DSM 2079 / NCTC 10582 / E50 / VPI-5482) OX=226186 GN=BT_1917 PE=4 SV=1	3.47872e+08	3.28747e+08	3.0334e+08	2.74829e+08	2.95161e+08	344242876	3.03186e+08	3.00195e+08	3.46447e+08	3.3617e+08
Q8A476	50S ribosomal protein L3 OS=Bacteroides thetaiotaomicron (strain ATCC 29148 / DSM 2079 / NCTC 10582 / E50 / VPI-5482) OX=226186 GN=rplC PE=3 SV=1	6.65082e+08	6.89559e+08	5.73696e+08	5.50413e+08	7.55468e+08	7.86932e+08	7.10325e+08	8.11163e+08	8.00575e+08	6.33304e+08
Q8A417	50S ribosomal subunit assembly factor BipA OS=Bacteroides thetaiotaomicron (strain ATCC 29148 / DSM 2079 / NCTC 10582 / E50 / VPI-5482) OX=226186 GN=bipA PE=3 SV=1	3.34013e+08	3.24248e+08	3.0806e+08	2.89002e+08	2.85455e+08	3.66159e+08	3.99775e+08	3.14723e+08	3.48108e+08	3.63742e+08
Q8A2W2	Putative coenzyme A transferase OS=Bacteroides thetaiotaomicron (strain ATCC 29148 / DSM 2079 / NCTC 10582 / E50 / VPI-5482) OX=226186 GN=BT_3193 PE=3 SV=1	1.64071e+08	1.54825e+08	1.47414e+08	1.38658e+08	1.28607e+08	176768787	179356780	152438866	1.81217e+08	1.76176e+08
Q8AAA8	Carbamoyl-phosphate synthase (glutamine-hydrolyzing) OS=Bacteroides thetaiotaomicron (strain ATCC 29148 / DSM 2079 / NCTC 10582 / E50 / VPI-5482) OX=226186 GN=BT_0557 PE=3 SV=1	1.18574e+08	1.2346e+08	1.26535e+08	1.16583e+08	1.15453e+08	1.47177e+08	1.43798e+08	1.2679e+08	1.52798e+08	1.28665e+08
Q8A7C3	Signal recognition particle protein OS=Bacteroides thetaiotaomicron (strain ATCC 29148 / DSM 2079 / NCTC 10582 / E50 / VPI-5482) OX=226186 GN=ffh PE=3 SV=1	1.60745e+08	1.55962e+08	1.51382e+08	1.31379e+08	146121638	1.93949e+08	1.51673e+08	1.52636e+08	1.90438e+08	1.63277e+08
Q89ZV6	GMP synthase [glutamine-hydrolyzing] 1 OS=Bacteroides thetaiotaomicron (strain ATCC 29148 / DSM 2079 / NCTC 10582 / E50 / VPI-5482) OX=226186 GN=guaA1 PE=3 SV=1	2.44545e+08	2.29253e+08	2.25151e+08	2.04245e+08	2.22156e+08	3.08476e+08	2.80403e+08	2.65131e+08	303692593	3.0769e+08
Q8A455	Glutamate--tRNA ligase OS=Bacteroides thetaiotaomicron (strain ATCC 29148 / DSM 2079 / NCTC 10582 / E50 / VPI-5482) OX=226186 GN=gltX PE=3 SV=1	2.38633e+08	2.89073e+08	2.35328e+08	2.00973e+08	2.14229e+08	2.9346e+08	2.66238e+08	1.9831e+08	320874366	2.61057e+08
Q8A535	Putative TonB-dependent outer membrane protein OS=Bacteroides thetaiotaomicron (strain ATCC 29148 / DSM 2079 / NCTC 10582 / E50 / VPI-5482) OX=226186 GN=BT_2409 PE=3 SV=1	3.84748e+08	2.91036e+08	2.89513e+08	2.93105e+08	3.055e+08	3.43214e+08	2.82781e+08	3.29448e+08	3.92508e+08	3.21467e+08
Q8AB73	Dipeptidyl-peptidase OS=Bacteroides thetaiotaomicron (strain ATCC 29148 / DSM 2079 / NCTC 10582 / E50 / VPI-5482) OX=226186 GN=BT_0237 PE=3 SV=1	2.73441e+08	2.98766e+08	2.67949e+08	2.57843e+08	2.5661e+08	2.72762e+08	2.89865e+08	2.42044e+08	2.7088e+08	2.5884e+08
Q8A5U3	Vitamin B12-dependent ribonucleotide reductase OS=Bacteroides thetaiotaomicron (strain ATCC 29148 / DSM 2079 / NCTC 10582 / E50 / VPI-5482) OX=226186 GN=BT_2145 PE=3 SV=1	1.67624e+08	2.0898e+08	1.55766e+08	1.70952e+08	1.77773e+08	2.16712e+08	2.23214e+08	1.78284e+08	2.11088e+08	1.80469e+08
Q8A6B5	NADP-dependent malate dehydrogenase OS=Bacteroides thetaiotaomicron (strain ATCC 29148 / DSM 2079 / NCTC 10582 / E50 / VPI-5482) OX=226186 GN=BT_1969 PE=3 SV=1	1.12043e+08	9.79834e+07	9.66996e+07	7.88809e+07	8.40346e+07	7.13377e+07	7.18293e+07	6.4339e+07	7.89487e+07	7.40588e+07
Q8A2S5	Tyrosine--tRNA ligase OS=Bacteroides thetaiotaomicron (strain ATCC 29148 / DSM 2079 / NCTC 10582 / E50 / VPI-5482) OX=226186 GN=tyrS PE=3 SV=1	3.5367e+08	3.49194e+08	3.21323e+08	3.04144e+08	3.09866e+08	4.09111e+08	3.49647e+08	3.28034e+08	409581588	4.00681e+08
Q8A739	Propionyl-CoA carboxylase beta chain OS=Bacteroides thetaiotaomicron (strain ATCC 29148 / DSM 2079 / NCTC 10582 / E50 / VPI-5482) OX=226186 GN=BT_1686 PE=4 SV=1	3.89758e+08	3.95245e+08	3.56911e+08	3.42245e+08	3.54847e+08	4.6233e+08	4.42954e+08	3.81122e+08	4.22005e+08	4.26326e+08
Q8A6S0	Acyl-CoA dehydrogenase OS=Bacteroides thetaiotaomicron (strain ATCC 29148 / DSM 2079 / NCTC 10582 / E50 / VPI-5482) OX=226186 GN=BT_1806 PE=3 SV=1	2.71158e+08	2.69239e+08	2.49049e+08	2.51189e+08	250803570	2.62963e+08	2.47042e+08	2.16032e+08	2.55411e+08	2.48362e+08
Q8A2A2	Transcription termination/antitermination protein NusA OS=Bacteroides thetaiotaomicron (strain ATCC 29148 / DSM 2079 / NCTC 10582 / E50 / VPI-5482) OX=226186 GN=nusA PE=3 SV=1	2.05231e+08	2.2187e+08	1.97913e+08	1.61387e+08	1.90921e+08	2.45752e+08	2.0118e+08	2.02545e+08	2.42196e+08	1.96575e+08
Q8A9H8	ATP-dependent protease OS=Bacteroides thetaiotaomicron (strain ATCC 29148 / DSM 2079 / NCTC 10582 / E50 / VPI-5482) OX=226186 GN=BT_0837 PE=4 SV=1	2.09919e+08	2.6099e+08	2.25209e+08	2.01865e+08	2.01087e+08	2.30829e+08	2.06705e+08	1.83891e+08	2.49397e+08	1.95444e+08
Q8A541	Aspartokinase OS=Bacteroides thetaiotaomicron (strain ATCC 29148 / DSM 2079 / NCTC 10582 / E50 / VPI-5482) OX=226186 GN=BT_2403 PE=3 SV=1	1.1145e+08	1.20238e+08	1.0488e+08	107299712	9.3502e+07	1.31131e+08	1.45983e+08	1.22109e+08	1.61153e+08	1.44111e+08
Q8A094	Glucosamine-6-phosphate deaminase OS=Bacteroides thetaiotaomicron (strain ATCC 29148 / DSM 2079 / NCTC 10582 / E50 / VPI-5482) OX=226186 GN=nagB PE=3 SV=1	4.10027e+08	4.36903e+08	3.79625e+08	3.41596e+08	3.65403e+08	4.44417e+08	4.08449e+08	3.2002e+08	4.49143e+08	4.08912e+08
Q8A1M5	Aspartate-semialdehyde dehydrogenase OS=Bacteroides thetaiotaomicron (strain ATCC 29148 / DSM 2079 / NCTC 10582 / E50 / VPI-5482) OX=226186 GN=asd PE=3 SV=1	1.57636e+08	1.93617e+08	1.68979e+08	1.4339e+08	1.62951e+08	2.46497e+08	2.22386e+08	2.09222e+08	2.74496e+08	2.37354e+08
Q8AAU4	Galactokinase OS=Bacteroides thetaiotaomicron (strain ATCC 29148 / DSM 2079 / NCTC 10582 / E50 / VPI-5482) OX=226186 GN=BT_0370 PE=3 SV=1	4.52021e+08	4.43931e+08	4.52515e+08	4.02028e+08	3.84301e+08	327448987	3.53985e+08	3.07244e+08	3.58522e+08	3.07242e+08
Q8A3F1	Toll-Interleukin receptor OS=Bacteroides thetaiotaomicron (strain ATCC 29148 / DSM 2079 / NCTC 10582 / E50 / VPI-5482) OX=226186 GN=BT_3003 PE=4 SV=1	7.81533e+07	8.28796e+07	7.16915e+07	7.39095e+07	7.13048e+07	9.9198e+07	8.20634e+07	8.23197e+07	1.01844e+08	8.52997e+07
Q8A0Z8	Asparagine--tRNA ligase OS=Bacteroides thetaiotaomicron (strain ATCC 29148 / DSM 2079 / NCTC 10582 / E50 / VPI-5482) OX=226186 GN=asnS PE=3 SV=1	3.23764e+08	3.56093e+08	2.7063e+08	2.86806e+08	2.91197e+08	3.41037e+08	3.34662e+08	2.88959e+08	3.41258e+08	3.33432e+08
Q8A5I2	Lipoprotein, putative OS=Bacteroides thetaiotaomicron (strain ATCC 29148 / DSM 2079 / NCTC 10582 / E50 / VPI-5482) OX=226186 GN=BT_2257 PE=4 SV=1	1.49276e+08	127898972	1.33903e+08	1.29525e+08	118931831	1.25018e+08	1.21179e+08	1.06292e+08	1.26701e+08	1.16141e+08
Q8A9V4	ATP synthase subunit beta OS=Bacteroides thetaiotaomicron (strain ATCC 29148 / DSM 2079 / NCTC 10582 / E50 / VPI-5482) OX=226186 GN=atpD PE=3 SV=1	2.54353e+08	2.20845e+08	2.294e+08	2.13276e+08	1.83704e+08	5.30952e+07	4.7794e+07	4.41928e+07	5.31021e+07	4.99292e+07
Q8AB53	Putative glucosamine-6-phosphate deaminase-like protein BT_0258 OS=Bacteroides thetaiotaomicron (strain ATCC 29148 / DSM 2079 / NCTC 10582 / E50 / VPI-5482) OX=226186 GN=BT_0258 PE=3 SV=1	1.06981e+08	1.07609e+08	9.13874e+07	8.06108e+07	7.80352e+07	1.07343e+08	1.07259e+08	8.62229e+07	1.16798e+08	1.12393e+08
Q8A1C4	Uncharacterized protein OS=Bacteroides thetaiotaomicron (strain ATCC 29148 / DSM 2079 / NCTC 10582 / E50 / VPI-5482) OX=226186 GN=BT_3742 PE=4 SV=1	3.76419e+08	4.22918e+08	3.47234e+08	301044305	3.70398e+08	459719235	3.57112e+08	4.41164e+08	497627192	3.95723e+08
Q8A2T6	S-adenosylmethionine synthase OS=Bacteroides thetaiotaomicron (strain ATCC 29148 / DSM 2079 / NCTC 10582 / E50 / VPI-5482) OX=226186 GN=metK PE=3 SV=1	1.67217e+08	1.82851e+08	1.57474e+08	156618166	1.68209e+08	2.17762e+08	2.3057e+08	1.93179e+08	218855466	1.74428e+08
Q8A6W3	SusC homolog OS=Bacteroides thetaiotaomicron (strain ATCC 29148 / DSM 2079 / NCTC 10582 / E50 / VPI-5482) OX=226186 GN=BT_1763 PE=1 SV=1	98330873	9.45682e+07	8.35717e+07	8.01407e+07	8.85448e+07	6.05142e+07	5.98478e+07	5.84855e+07	7.31022e+07	5.01231e+07
Q8AA75	CTP synthase OS=Bacteroides thetaiotaomicron (strain ATCC 29148 / DSM 2079 / NCTC 10582 / E50 / VPI-5482) OX=226186 GN=pyrG PE=3 SV=1	2.94508e+08	3.60223e+08	2.37203e+08	247780697	293965796	3.22401e+08	3.19792e+08	2.79861e+08	3.27181e+08	2.48772e+08
Q89YR7	Tryptophan synthase OS=Bacteroides thetaiotaomicron (strain ATCC 29148 / DSM 2079 / NCTC 10582 / E50 / VPI-5482) OX=226186 GN=BT_4664 PE=3 SV=1	8.27728e+07	1.3327e+08	7.63599e+07	6.78963e+07	1.01757e+08	1.58804e+08	1.5241e+08	1.40611e+08	1.72107e+08	1.23453e+08
Q8A0H6	Aminoacyl-histidine dipeptidase OS=Bacteroides thetaiotaomicron (strain ATCC 29148 / DSM 2079 / NCTC 10582 / E50 / VPI-5482) OX=226186 GN=BT_4045 PE=4 SV=1	137195070	1.44116e+08	1.34925e+08	1.25199e+08	1.318e+08	1.64043e+08	1.48872e+08	1.29786e+08	1.66555e+08	1.27796e+08
Q8A6W6	Glycoside hydrolase family 32 OS=Bacteroides thetaiotaomicron (strain ATCC 29148 / DSM 2079 / NCTC 10582 / E50 / VPI-5482) OX=226186 GN=BT_1760 PE=1 SV=1	1.36674e+08	1.24898e+08	1.16289e+08	1.13412e+08	1.25662e+08	1.07974e+08	103068549	1.00273e+08	1.16889e+08	1.11052e+08
Q8A9P4	1,4-alpha-glucan branching enzyme OS=Bacteroides thetaiotaomicron (strain ATCC 29148 / DSM 2079 / NCTC 10582 / E50 / VPI-5482) OX=226186 GN=BT_0771 PE=3 SV=1	4.80834e+07	5.01263e+07	4.54303e+07	4.13424e+07	4.3569e+07	5.62242e+07	4.75876e+07	4.00337e+07	5.90096e+07	5.18902e+07
Q8AAP9	Sulfate adenylyltransferase subunit 1 OS=Bacteroides thetaiotaomicron (strain ATCC 29148 / DSM 2079 / NCTC 10582 / E50 / VPI-5482) OX=226186 GN=cysN PE=3 SV=1	1.3506e+08	1.35578e+08	1.17943e+08	1.01091e+08	1.18412e+08	6.53555e+07	7.13578e+07	5.79748e+07	6.89143e+07	64253255
Q8A6W7	Levanase (2,6-beta-D-fructofuranosidase) OS=Bacteroides thetaiotaomicron (strain ATCC 29148 / DSM 2079 / NCTC 10582 / E50 / VPI-5482) OX=226186 GN=BT_1759 PE=3 SV=1	1.21535e+08	2.28913e+08	9.88954e+07	1.00059e+08	2.13634e+08	1.96309e+08	1.53072e+08	1.68983e+08	2.07989e+08	113176502
Q8A107	Tryptophan--tRNA ligase OS=Bacteroides thetaiotaomicron (strain ATCC 29148 / DSM 2079 / NCTC 10582 / E50 / VPI-5482) OX=226186 GN=BT_3864 PE=3 SV=1	1.96349e+08	2.09989e+08	2.02339e+08	1.62633e+08	1.4443e+08	1.62306e+08	1.93029e+08	1.26842e+08	1.92576e+08	1.26003e+08
Q8A8C5	ABC transporter ATP-binding protein OS=Bacteroides thetaiotaomicron (strain ATCC 29148 / DSM 2079 / NCTC 10582 / E50 / VPI-5482) OX=226186 GN=BT_1242 PE=4 SV=1	1.79205e+08	163791034	1.65258e+08	1.37465e+08	1.28191e+08	1.98229e+08	2.18366e+08	1.78684e+08	208970065	246618365
Q8A0F6	NADH-quinone oxidoreductase subunit C/D OS=Bacteroides thetaiotaomicron (strain ATCC 29148 / DSM 2079 / NCTC 10582 / E50 / VPI-5482) OX=226186 GN=nuoC PE=3 SV=2	9.17914e+07	1.05216e+08	8.69063e+07	7.5279e+07	8.67347e+07	6.23776e+07	5.71692e+07	5.09036e+07	6.50422e+07	5.37511e+07
Q8A880	Glycogen [starch] synthase, glycosyltransferase OS=Bacteroides thetaiotaomicron (strain ATCC 29148 / DSM 2079 / NCTC 10582 / E50 / VPI-5482) OX=226186 GN=BT_1294 PE=4 SV=1	9.38096e+07	8.97794e+07	8.00066e+07	9.23122e+07	6.46377e+07	6.77537e+07	6.85817e+07	5.14096e+07	7.05634e+07	7.5751e+07
Q8A5H9	Outer membrane protein Omp121 OS=Bacteroides thetaiotaomicron (strain ATCC 29148 / DSM 2079 / NCTC 10582 / E50 / VPI-5482) OX=226186 GN=BT_2260 PE=3 SV=1	4.64424e+07	6.31925e+07	4.68401e+07	4.62326e+07	5.44177e+07	7.57737e+07	5.96984e+07	7.83887e+07	9.22857e+07	5.85665e+07
Q8A8L2	Na(+)-translocating NADH-quinone reductase subunit F OS=Bacteroides thetaiotaomicron (strain ATCC 29148 / DSM 2079 / NCTC 10582 / E50 / VPI-5482) OX=226186 GN=nqrF PE=3 SV=1	3.07475e+08	2.98999e+08	2.89464e+08	265219091	2.9112e+08	2.86423e+08	2.46278e+08	307601583	3.60637e+08	2.53817e+08
Q8A849	Glutamine--tRNA ligase OS=Bacteroides thetaiotaomicron (strain ATCC 29148 / DSM 2079 / NCTC 10582 / E50 / VPI-5482) OX=226186 GN=BT_1325 PE=3 SV=1	1.77542e+08	1.67039e+08	147829993	1.22468e+08	1.44015e+08	1.77503e+08	2.0507e+08	1.60296e+08	1.91043e+08	2.01288e+08
Q8AA21	Pyruvate, phosphate dikinase OS=Bacteroides thetaiotaomicron (strain ATCC 29148 / DSM 2079 / NCTC 10582 / E50 / VPI-5482) OX=226186 GN=BT_0644 PE=3 SV=1	1.09276e+08	102227167	9.21583e+07	7.8792e+07	8.69078e+07	9.2091e+07	8.67311e+07	7.47888e+07	1.01266e+08	8.77637e+07
Q8A2F4	Cysteine--tRNA ligase OS=Bacteroides thetaiotaomicron (strain ATCC 29148 / DSM 2079 / NCTC 10582 / E50 / VPI-5482) OX=226186 GN=cysS PE=3 SV=1	122609263	1.29417e+08	117638982	1.06679e+08	9.40813e+07	1.26496e+08	1.36584e+08	1.13932e+08	1.32145e+08	1.27822e+08
Q8A7H3	Peptidase M1A and M12B OS=Bacteroides thetaiotaomicron (strain ATCC 29148 / DSM 2079 / NCTC 10582 / E50 / VPI-5482) OX=226186 GN=BT_1551 PE=4 SV=1	109324634	1.07021e+08	9.54815e+07	8.75777e+07	8.49718e+07	1.08314e+08	1.01294e+08	7.7073e+07	1.16611e+08	1.07746e+08
Q8A9N0	Glutamine synthetase I OS=Bacteroides thetaiotaomicron (strain ATCC 29148 / DSM 2079 / NCTC 10582 / E50 / VPI-5482) OX=226186 GN=BT_0785 PE=3 SV=1	9.90718e+07	1.13062e+08	9.67007e+07	8.73314e+07	8.8957e+07	1.24409e+08	1.09577e+08	9.17765e+07	1.23678e+08	1.06277e+08
Q8A6N4	Adenylosuccinate synthetase OS=Bacteroides thetaiotaomicron (strain ATCC 29148 / DSM 2079 / NCTC 10582 / E50 / VPI-5482) OX=226186 GN=purA PE=3 SV=1	2.8043e+08	2.82466e+08	279246988	2.60464e+08	2.48743e+08	3.37627e+08	356773103	2.92154e+08	3.51802e+08	2.82e+08
Q8A9P9	Uncharacterized protein OS=Bacteroides thetaiotaomicron (strain ATCC 29148 / DSM 2079 / NCTC 10582 / E50 / VPI-5482) OX=226186 GN=BT_0766 PE=4 SV=1	5.15434e+08	5.25727e+08	5.04935e+08	4.48757e+08	443720677	4.61666e+08	4.89545e+08	4.43255e+08	5.13701e+08	402030945
Q8A6N7	Histidine--tRNA ligase OS=Bacteroides thetaiotaomicron (strain ATCC 29148 / DSM 2079 / NCTC 10582 / E50 / VPI-5482) OX=226186 GN=hisS PE=3 SV=1	1.71542e+08	1.66632e+08	1.50526e+08	1.54902e+08	1.4688e+08	1.68634e+08	1.59115e+08	1.36656e+08	1.69607e+08	138684805
Q8A0C0	Alanine racemase OS=Bacteroides thetaiotaomicron (strain ATCC 29148 / DSM 2079 / NCTC 10582 / E50 / VPI-5482) OX=226186 GN=BT_4101 PE=3 SV=1	5.70568e+07	5.73696e+07	5.62339e+07	4.50601e+07	4.97848e+07	5.6458e+07	3.59579e+07	3.7713e+07	5.42757e+07	3.93044e+07
Q8A578	SusC homolog OS=Bacteroides thetaiotaomicron (strain ATCC 29148 / DSM 2079 / NCTC 10582 / E50 / VPI-5482) OX=226186 GN=BT_2364 PE=4 SV=1	9.77725e+07	9.80986e+07	9.23683e+07	8.37028e+07	8.52898e+07	2.40601e+07	2.38347e+07	2.38122e+07	2.75197e+07	1.41105e+07
Q8A9B7	ATP-dependent Clp protease OS=Bacteroides thetaiotaomicron (strain ATCC 29148 / DSM 2079 / NCTC 10582 / E50 / VPI-5482) OX=226186 GN=BT_0898 PE=3 SV=1	8.98168e+07	1.03174e+08	7.85462e+07	7.97808e+07	8.48618e+07	7.24381e+07	6.66552e+07	5.97082e+07	7.29108e+07	6.10763e+07
Q8AA42	UDP-glucose 4-epimerase OS=Bacteroides thetaiotaomicron (strain ATCC 29148 / DSM 2079 / NCTC 10582 / E50 / VPI-5482) OX=226186 GN=BT_0623 PE=3 SV=1	4.85797e+08	4.84297e+08	4.45706e+08	429679988	4.02197e+08	4.91843e+08	4.65871e+08	3.8612e+08	4.98128e+08	3.95745e+08
Q8A7B0	Aminoacyl-histidine dipeptidase OS=Bacteroides thetaiotaomicron (strain ATCC 29148 / DSM 2079 / NCTC 10582 / E50 / VPI-5482) OX=226186 GN=BT_1615 PE=4 SV=1	6.50415e+07	8.95302e+07	8.25548e+07	7.66184e+07	8.48731e+07	9.71247e+07	9.00977e+07	8.41536e+07	9.68216e+07	6.82402e+07
Q8A529	Aminotransferase OS=Bacteroides thetaiotaomicron (strain ATCC 29148 / DSM 2079 / NCTC 10582 / E50 / VPI-5482) OX=226186 GN=BT_2415 PE=3 SV=1	1.85167e+08	2.07551e+08	1.97602e+08	1.56825e+08	1.6443e+08	2.58652e+08	2.40593e+08	2.13586e+08	2.83938e+08	2.08179e+08
Q8A9W4	Putative ATPase/kinase OS=Bacteroides thetaiotaomicron (strain ATCC 29148 / DSM 2079 / NCTC 10582 / E50 / VPI-5482) OX=226186 GN=BT_0701 PE=4 SV=1	7.93942e+07	8.1464e+07	7.15609e+07	6.23856e+07	7.49103e+07	8.30343e+07	7.60369e+07	6.48077e+07	8.15687e+07	7.56906e+07
Q8A9S7	Serine hydroxymethyltransferase OS=Bacteroides thetaiotaomicron (strain ATCC 29148 / DSM 2079 / NCTC 10582 / E50 / VPI-5482) OX=226186 GN=glyA PE=3 SV=1	1.88194e+08	2.1546e+08	1.89053e+08	1.82989e+08	2.22793e+08	3.10406e+08	2.73393e+08	2.70732e+08	3.2792e+08	2.34629e+08
Q8A2Q2	Phosphoribosylamine--glycine ligase OS=Bacteroides thetaiotaomicron (strain ATCC 29148 / DSM 2079 / NCTC 10582 / E50 / VPI-5482) OX=226186 GN=purD PE=3 SV=1	1.50766e+08	1.55227e+08	137333219	1.15334e+08	1.39707e+08	1.78307e+08	1.55339e+08	1.55081e+08	1.77e+08	1.54972e+08
Q8A004	Phosphoribosylaminoimidazole-succinocarboxamide synthase OS=Bacteroides thetaiotaomicron (strain ATCC 29148 / DSM 2079 / NCTC 10582 / E50 / VPI-5482) OX=226186 GN=purC PE=3 SV=1	4.55176e+08	4.67827e+08	4.08716e+08	3.92324e+08	3.97701e+08	4.71033e+08	4.82672e+08	4.07185e+08	4.77037e+08	4.16498e+08
Q8AA33	Elongation factor 4 OS=Bacteroides thetaiotaomicron (strain ATCC 29148 / DSM 2079 / NCTC 10582 / E50 / VPI-5482) OX=226186 GN=lepA PE=3 SV=1	5.74022e+07	7.31628e+07	6.1704e+07	6.20444e+07	5.34048e+07	7.57109e+07	7.21566e+07	5.95393e+07	7.87813e+07	6.27642e+07
Q8A6Y6	Excinuclease ABC subunit A OS=Bacteroides thetaiotaomicron (strain ATCC 29148 / DSM 2079 / NCTC 10582 / E50 / VPI-5482) OX=226186 GN=BT_1739 PE=4 SV=1	3.00154e+07	46207650	3.49538e+07	3.10423e+07	3.74518e+07	4.58275e+07	4.08359e+07	3.53508e+07	4.72059e+07	3.37523e+07
Q8A9E5	8-amino-7-oxononanoate synthase OS=Bacteroides thetaiotaomicron (strain ATCC 29148 / DSM 2079 / NCTC 10582 / E50 / VPI-5482) OX=226186 GN=BT_0870 PE=3 SV=1	1.32873e+08	1.54382e+08	1.26924e+08	1.21679e+08	1.70046e+08	2.2439e+08	1.34057e+08	1.84766e+08	2.04255e+08	1.43993e+08
Q89YW9	Saccharopine dehydrogenase OS=Bacteroides thetaiotaomicron (strain ATCC 29148 / DSM 2079 / NCTC 10582 / E50 / VPI-5482) OX=226186 GN=BT_4612 PE=4 SV=1	1.60804e+08	1.61352e+08	1.46524e+08	1.37264e+08	1.4734e+08	1.97639e+08	1.62389e+08	1.57971e+08	2.00564e+08	161939224
Q8A028	Dipeptidyl peptidase IV OS=Bacteroides thetaiotaomicron (strain ATCC 29148 / DSM 2079 / NCTC 10582 / E50 / VPI-5482) OX=226186 GN=BT_4193 PE=4 SV=1	1.73964e+08	1.52354e+08	1.38685e+08	1.44761e+08	1.24666e+08	1.35956e+08	1.19162e+08	1.13039e+08	1.36397e+08	1.43766e+08
Q8A8I1	Energy-dependent translational throttle protein EttA OS=Bacteroides thetaiotaomicron (strain ATCC 29148 / DSM 2079 / NCTC 10582 / E50 / VPI-5482) OX=226186 GN=ettA PE=3 SV=1	7.9299e+07	9.79288e+07	7.29002e+07	7.92113e+07	8.77555e+07	1.27489e+08	1.04884e+08	9.21553e+07	1.22374e+08	8.59024e+07
Q8A0S1	Phosphoglucomutase/phosphomannomutase OS=Bacteroides thetaiotaomicron (strain ATCC 29148 / DSM 2079 / NCTC 10582 / E50 / VPI-5482) OX=226186 GN=BT_3950 PE=3 SV=1	1.43854e+08	1.3726e+08	1.52798e+08	116115562	1.1825e+08	1.69455e+08	1.82109e+08	1.38484e+08	1.84166e+08	185851055
Q8A155	Bifunctional purine biosynthesis protein PurH OS=Bacteroides thetaiotaomicron (strain ATCC 29148 / DSM 2079 / NCTC 10582 / E50 / VPI-5482) OX=226186 GN=purH PE=3 SV=1	2.48676e+08	2.76483e+08	2.54612e+08	2.27212e+08	2.38253e+08	277228397	2.25384e+08	2.12383e+08	2.83986e+08	2.16302e+08
Q8A528	Riboflavin biosynthesis protein RibBA OS=Bacteroides thetaiotaomicron (strain ATCC 29148 / DSM 2079 / NCTC 10582 / E50 / VPI-5482) OX=226186 GN=ribBA PE=3 SV=1	1.67037e+08	2.06328e+08	1.62302e+08	1.48684e+08	1.81483e+08	2.14307e+08	188778303	1.93615e+08	2.16975e+08	1.57446e+08
Q8A033	Enoyl-[acyl-carrier-protein] reductase [NADH] OS=Bacteroides thetaiotaomicron (strain ATCC 29148 / DSM 2079 / NCTC 10582 / E50 / VPI-5482) OX=226186 GN=BT_4188 PE=3 SV=1	5.39899e+08	4.9202e+08	4.87488e+08	4.38699e+08	416612278	5.46052e+08	5.46802e+08	4.07116e+08	5.59036e+08	5.31642e+08
Q8A491	50S ribosomal protein L6 OS=Bacteroides thetaiotaomicron (strain ATCC 29148 / DSM 2079 / NCTC 10582 / E50 / VPI-5482) OX=226186 GN=rplF PE=3 SV=1	4.77962e+08	587766138	419150186	4.51872e+08	4.8798e+08	6.8957e+08	646357442	5.77779e+08	6.56722e+08	5.88736e+08
Q8A2P5	DNA polymerase I OS=Bacteroides thetaiotaomicron (strain ATCC 29148 / DSM 2079 / NCTC 10582 / E50 / VPI-5482) OX=226186 GN=polA PE=3 SV=1	3.56277e+07	4.3885e+07	3.42094e+07	3.40017e+07	3.82967e+07	5.24728e+07	4.35761e+07	4.71597e+07	5.56351e+07	3.80857e+07
Q89ZR4	Seryl-tRNA synthetase OS=Bacteroides thetaiotaomicron (strain ATCC 29148 / DSM 2079 / NCTC 10582 / E50 / VPI-5482) OX=226186 GN=BT_4312 PE=4 SV=1	2.3359e+08	2.13261e+08	2.17361e+08	1.9483e+08	1.97718e+08	2.54427e+08	2.52687e+08	2.16586e+08	2.54093e+08	2.76484e+08
Q8A6A6	Meso-diaminopimelate D-dehydrogenase OS=Bacteroides thetaiotaomicron (strain ATCC 29148 / DSM 2079 / NCTC 10582 / E50 / VPI-5482) OX=226186 GN=BT_1979 PE=3 SV=1	2.99125e+08	2.50888e+08	2.63694e+08	1.94964e+08	2.0864e+08	2.80477e+08	2.73178e+08	2.14805e+08	3.18194e+08	3.51458e+08
Q8A9A5	Magnesium chelatase, subunit I OS=Bacteroides thetaiotaomicron (strain ATCC 29148 / DSM 2079 / NCTC 10582 / E50 / VPI-5482) OX=226186 GN=BT_0910 PE=4 SV=1	3.97273e+08	3.6587e+08	3.42447e+08	3.40702e+08	3.63216e+08	4.04879e+08	3.34391e+08	3.30888e+08	3.87173e+08	3.75004e+08
Q8A8E1	Putative long-chain-fatty-acid--CoA ligase OS=Bacteroides thetaiotaomicron (strain ATCC 29148 / DSM 2079 / NCTC 10582 / E50 / VPI-5482) OX=226186 GN=BT_1226 PE=4 SV=1	1.14576e+08	152161740	129391977	9.98837e+07	1.25452e+08	1.25716e+08	9.00537e+07	104234554	1.4125e+08	8.88351e+07
Q8A1G8	Acetate kinase OS=Bacteroides thetaiotaomicron (strain ATCC 29148 / DSM 2079 / NCTC 10582 / E50 / VPI-5482) OX=226186 GN=ackA PE=3 SV=1	1.59295e+08	1.40939e+08	1.45925e+08	1.31856e+08	1.19401e+08	1.65851e+08	1.86016e+08	1.44887e+08	1.73777e+08	1.83416e+08
Q8A6T7	Aminopeptidase OS=Bacteroides thetaiotaomicron (strain ATCC 29148 / DSM 2079 / NCTC 10582 / E50 / VPI-5482) OX=226186 GN=BT_1789 PE=3 SV=1	1.59543e+08	2.91197e+08	1.53699e+08	1.73569e+08	2.32524e+08	308599454	2.70602e+08	2.54991e+08	3.20391e+08	142986984
Q8A602	Chorismate synthase OS=Bacteroides thetaiotaomicron (strain ATCC 29148 / DSM 2079 / NCTC 10582 / E50 / VPI-5482) OX=226186 GN=aroC PE=3 SV=1	1.81395e+08	1.95522e+08	1.92789e+08	1.52066e+08	167053805	1.87099e+08	1.9134e+08	1.66204e+08	1.97667e+08	180711727
Q8A1F8	Alkaline phosphatase III OS=Bacteroides thetaiotaomicron (strain ATCC 29148 / DSM 2079 / NCTC 10582 / E50 / VPI-5482) OX=226186 GN=BT_3708 PE=3 SV=1	8.34572e+07	8.07959e+07	8.35747e+07	6.49955e+07	7.44071e+07	1.23861e+08	1.13122e+08	8.48016e+07	1.326e+08	1.07698e+08
Q8A3H8	Peptidyl-prolyl cis-trans isomerase OS=Bacteroides thetaiotaomicron (strain ATCC 29148 / DSM 2079 / NCTC 10582 / E50 / VPI-5482) OX=226186 GN=BT_2976 PE=3 SV=1	1.54044e+08	1.34292e+08	1.413e+08	1.13975e+08	1.33388e+08	1.66843e+08	1.42258e+08	1.3735e+08	1.77363e+08	1.68861e+08
Q8A803	2-amino-3-ketobutyrate coenzyme A ligase OS=Bacteroides thetaiotaomicron (strain ATCC 29148 / DSM 2079 / NCTC 10582 / E50 / VPI-5482) OX=226186 GN=kbl PE=3 SV=1	1.84036e+08	2.0072e+08	1.71048e+08	1.7175e+08	1.63645e+08	1.61142e+08	176429089	1.4006e+08	1.57738e+08	153779998
Q89Z05	Enolase OS=Bacteroides thetaiotaomicron (strain ATCC 29148 / DSM 2079 / NCTC 10582 / E50 / VPI-5482) OX=226186 GN=eno PE=3 SV=1	1.24543e+08	1.06928e+08	1.0996e+08	9.05489e+07	9.06807e+07	1.85284e+08	1.90569e+08	1.69746e+08	1.91049e+08	2.12302e+08
Q8A862	Serine protease OS=Bacteroides thetaiotaomicron (strain ATCC 29148 / DSM 2079 / NCTC 10582 / E50 / VPI-5482) OX=226186 GN=BT_1312 PE=4 SV=1	2.18906e+08	2.29636e+08	2.16505e+08	1.80209e+08	1.74397e+08	1.0289e+08	1.05145e+08	9.54204e+07	1.22822e+08	1.00861e+08
Q8A8L5	D-3-phosphoglycerate dehydrogenase OS=Bacteroides thetaiotaomicron (strain ATCC 29148 / DSM 2079 / NCTC 10582 / E50 / VPI-5482) OX=226186 GN=BT_1152 PE=3 SV=1	3.05875e+08	2.67411e+08	2.74077e+08	2.62145e+08	2.62009e+08	2.62712e+08	2.71654e+08	2.38217e+08	2.61876e+08	2.70262e+08
Q8A1V8	Putative long-chain-fatty-acid--CoA ligase OS=Bacteroides thetaiotaomicron (strain ATCC 29148 / DSM 2079 / NCTC 10582 / E50 / VPI-5482) OX=226186 GN=BT_3550 PE=3 SV=1	9.23939e+07	7.96087e+07	7.79194e+07	7.76024e+07	63245185	7.50032e+07	8.69354e+07	6.0111e+07	7.5926e+07	9.39135e+07
Q8A756	Phenylalanine--tRNA ligase alpha subunit OS=Bacteroides thetaiotaomicron (strain ATCC 29148 / DSM 2079 / NCTC 10582 / E50 / VPI-5482) OX=226186 GN=pheS PE=3 SV=1	143428101	1.53432e+08	1.2137e+08	1.15833e+08	1.54958e+08	188832721	1.434e+08	1.63059e+08	1.83641e+08	1.59652e+08
Q8A9M6	Malonyl CoA-acyl carrier protein transacylase OS=Bacteroides thetaiotaomicron (strain ATCC 29148 / DSM 2079 / NCTC 10582 / E50 / VPI-5482) OX=226186 GN=BT_0789 PE=3 SV=1	4.36839e+08	4.47481e+08	4.6839e+08	4.11299e+08	3.65228e+08	3.61792e+08	4.49497e+08	3.2752e+08	4.05444e+08	350874211
Q8A612	Ketol-acid reductoisomerase OS=Bacteroides thetaiotaomicron (strain ATCC 29148 / DSM 2079 / NCTC 10582 / E50 / VPI-5482) OX=226186 GN=BT_2074 PE=3 SV=1	1.22937e+08	1.2566e+08	1.16767e+08	9.21406e+07	1.13676e+08	1.56436e+08	1.26675e+08	1.3688e+08	1.55797e+08	1.48414e+08
Q8A7Z9	Aspartokinase OS=Bacteroides thetaiotaomicron (strain ATCC 29148 / DSM 2079 / NCTC 10582 / E50 / VPI-5482) OX=226186 GN=BT_1375 PE=3 SV=1	1.98109e+08	2.18707e+08	1.87321e+08	1.93284e+08	2.01867e+08	2.51664e+08	2.60009e+08	2.06588e+08	2.56265e+08	1.76826e+08
Q8A8C9	Putative RNA binding protein with S1 RNA-binding domain OS=Bacteroides thetaiotaomicron (strain ATCC 29148 / DSM 2079 / NCTC 10582 / E50 / VPI-5482) OX=226186 GN=BT_1238 PE=4 SV=1	7.89009e+07	6.28797e+07	5.93237e+07	5.67311e+07	5.86572e+07	7.01972e+07	6.85895e+07	6.05769e+07	7.43388e+07	71981462
Q8A407	Adenosylhomocysteinase OS=Bacteroides thetaiotaomicron (strain ATCC 29148 / DSM 2079 / NCTC 10582 / E50 / VPI-5482) OX=226186 GN=ahcY PE=3 SV=1	2.32077e+08	2.15283e+08	172965712	1.42022e+08	2.71245e+08	2.8172e+08	160682976	2.43897e+08	2.38243e+08	1.01761e+08
Q8A0T7	Putative phospho-2-dehydro-3-deoxyheptonate aldolase/chorismate mutase OS=Bacteroides thetaiotaomicron (strain ATCC 29148 / DSM 2079 / NCTC 10582 / E50 / VPI-5482) OX=226186 GN=BT_3934 PE=4 SV=1	1.02988e+08	1.05692e+08	1.01564e+08	9.46016e+07	1.02219e+08	8.78884e+07	6.997e+07	7.2266e+07	8.91766e+07	64891570
Q8A601	Putative succinyl-diaminopimelate desuccinylase OS=Bacteroides thetaiotaomicron (strain ATCC 29148 / DSM 2079 / NCTC 10582 / E50 / VPI-5482) OX=226186 GN=BT_2085 PE=4 SV=1	5.16495e+07	9.22162e+07	6.54519e+07	8.17962e+07	8.04727e+07	7.52746e+07	7.04945e+07	6.02721e+07	7.29576e+07	5.00577e+07
Q8A9R7	Phosphoribosyl pyrophosphate synthase OS=Bacteroides thetaiotaomicron (strain ATCC 29148 / DSM 2079 / NCTC 10582 / E50 / VPI-5482) OX=226186 GN=BT_0748 PE=4 SV=1	1.5784e+08	1.84877e+08	1.64874e+08	1.36038e+08	1.46143e+08	2.1171e+08	1.70349e+08	1.38612e+08	2.22366e+08	1.74835e+08
E7MCA9	Uncharacterized protein OS=Bacteroides thetaiotaomicron (strain ATCC 29148 / DSM 2079 / NCTC 10582 / E50 / VPI-5482) OX=226186 GN=BT_3361a PE=4 SV=1	1.01783e+08	9.88773e+07	1.03857e+08	9.38953e+07	8.16485e+07	1.14765e+08	9.85005e+07	8.37317e+07	1.24107e+08	8.3954e+07
Q8A0U2	Triosephosphate isomerase OS=Bacteroides thetaiotaomicron (strain ATCC 29148 / DSM 2079 / NCTC 10582 / E50 / VPI-5482) OX=226186 GN=tpiA PE=3 SV=1	1056399899	1070428761	1127409369	1038896765	1009844711	1350254802	1209254990	1217502734	1312467116	1010888153
Q8A3W8	2-oxoglutarate synthase subunit korA OS=Bacteroides thetaiotaomicron (strain ATCC 29148 / DSM 2079 / NCTC 10582 / E50 / VPI-5482) OX=226186 GN=BT_2836 PE=4 SV=1	6.82933e+07	6.48415e+07	6.01356e+07	5.70803e+07	5.74944e+07	7.16046e+07	5.6527e+07	6.01893e+07	6.57933e+07	7.05381e+07
Q8A824	CDP-glucose 4,6-dehydratase OS=Bacteroides thetaiotaomicron (strain ATCC 29148 / DSM 2079 / NCTC 10582 / E50 / VPI-5482) OX=226186 GN=BT_1350 PE=4 SV=1	9.36938e+07	1.78666e+08	8.0286e+07	9.02689e+07	1.59978e+08	1.67902e+08	1.09515e+08	1.38534e+08	1.78795e+08	8.9139e+07
Q8A7T2	Biotin biosynthesis bifunctional protein BioAB OS=Bacteroides thetaiotaomicron (strain ATCC 29148 / DSM 2079 / NCTC 10582 / E50 / VPI-5482) OX=226186 GN=bioB PE=3 SV=2	4.29597e+07	4.24776e+07	3.5295e+07	3.20534e+07	3.59279e+07	2.38493e+07	1.94689e+07	1.57836e+07	2.31174e+07	1.71323e+07
Q8A2B1	Biosynthetic arginine decarboxylase OS=Bacteroides thetaiotaomicron (strain ATCC 29148 / DSM 2079 / NCTC 10582 / E50 / VPI-5482) OX=226186 GN=speA PE=3 SV=1	1.31873e+08	1.18628e+08	9.97322e+07	9.529e+07	9.89751e+07	1.39779e+08	1.47838e+08	123029031	1.46049e+08	1.58984e+08
Q8A801	Ferritin OS=Bacteroides thetaiotaomicron (strain ATCC 29148 / DSM 2079 / NCTC 10582 / E50 / VPI-5482) OX=226186 GN=BT_1373 PE=3 SV=1	1.85709e+08	2.4824e+08	1.92218e+08	160454051	199382374	2.39809e+08	2.58238e+08	2.28187e+08	2.92478e+08	2.02625e+08
Q89ZJ0	Adenylate kinase OS=Bacteroides thetaiotaomicron (strain ATCC 29148 / DSM 2079 / NCTC 10582 / E50 / VPI-5482) OX=226186 GN=adk PE=3 SV=1	3.22947e+08	3.12091e+08	2.56781e+08	2.60651e+08	2.88178e+08	4.64297e+08	3.68533e+08	3.82352e+08	4.4303e+08	4.15707e+08
Q8A308	Uncharacterized protein OS=Bacteroides thetaiotaomicron (strain ATCC 29148 / DSM 2079 / NCTC 10582 / E50 / VPI-5482) OX=226186 GN=BT_3147 PE=4 SV=1	2.54692e+08	2.264e+08	2.27246e+08	212588749	2.0536e+08	3.05318e+08	2.89384e+08	2.76509e+08	3.0205e+08	3.14842e+08
Q8A339	Ribosome-binding ATPase YchF OS=Bacteroides thetaiotaomicron (strain ATCC 29148 / DSM 2079 / NCTC 10582 / E50 / VPI-5482) OX=226186 GN=ychF PE=3 SV=1	2.01e+08	192185688	1.80545e+08	1.63013e+08	1.63311e+08	2.2244e+08	2.05835e+08	1.98946e+08	2.24607e+08	2.25266e+08
Q89ZV9	Peptidyl-dipeptidase OS=Bacteroides thetaiotaomicron (strain ATCC 29148 / DSM 2079 / NCTC 10582 / E50 / VPI-5482) OX=226186 GN=BT_4262 PE=3 SV=1	1.74194e+08	1.29853e+08	1.39732e+08	1.17592e+08	1.21361e+08	143337678	1.63491e+08	1.26219e+08	150070093	1.82695e+08
Q8A095	Flavoprotein OS=Bacteroides thetaiotaomicron (strain ATCC 29148 / DSM 2079 / NCTC 10582 / E50 / VPI-5482) OX=226186 GN=BT_4126 PE=3 SV=1	2.28699e+08	246611180	2.16997e+08	1.81599e+08	2.16947e+08	2.40812e+08	2.39352e+08	2.20006e+08	260735126	2.14995e+08
Q89ZP5	Putative methyltransferase OS=Bacteroides thetaiotaomicron (strain ATCC 29148 / DSM 2079 / NCTC 10582 / E50 / VPI-5482) OX=226186 GN=BT_4331 PE=4 SV=1	5.66296e+07	5.91339e+07	5.32376e+07	6.01804e+07	4.95519e+07	6.6514e+07	7.99287e+07	5.40884e+07	7.03477e+07	6.39704e+07
Q8A6P3	Putative hydrogenase OS=Bacteroides thetaiotaomicron (strain ATCC 29148 / DSM 2079 / NCTC 10582 / E50 / VPI-5482) OX=226186 GN=BT_1834 PE=4 SV=1	5.8479e+07	5.72604e+07	5.36685e+07	5.41627e+07	5.17949e+07	7.97941e+07	8.45905e+07	6.84027e+07	7.89375e+07	8.65447e+07
Q8A7X1	1-deoxy-D-xylulose-5-phosphate synthase OS=Bacteroides thetaiotaomicron (strain ATCC 29148 / DSM 2079 / NCTC 10582 / E50 / VPI-5482) OX=226186 GN=BT_1403 PE=3 SV=1	5.385e+07	3.73528e+07	5.1781e+07	4.51577e+07	3.67709e+07	4.20904e+07	4.48849e+07	3.56271e+07	4.90946e+07	5.83955e+07
Q8A159	Nucleotidyltransferase family protein OS=Bacteroides thetaiotaomicron (strain ATCC 29148 / DSM 2079 / NCTC 10582 / E50 / VPI-5482) OX=226186 GN=BT_3808 PE=4 SV=1	2.74561e+08	3.6476e+08	2.82398e+08	2.42205e+08	3.10359e+08	3.42119e+08	3.43591e+08	2.86069e+08	3.57379e+08	2.68881e+08
Q8A0Z9	Pseudouridine synthase OS=Bacteroides thetaiotaomicron (strain ATCC 29148 / DSM 2079 / NCTC 10582 / E50 / VPI-5482) OX=226186 GN=BT_3872 PE=3 SV=1	2.23483e+08	2.78435e+08	1.60546e+08	1.87725e+08	3.05218e+08	2.69962e+08	2.47431e+08	2.82564e+08	2.67917e+08	1.32492e+08
Q89ZQ6	Putative zinc protease OS=Bacteroides thetaiotaomicron (strain ATCC 29148 / DSM 2079 / NCTC 10582 / E50 / VPI-5482) OX=226186 GN=BT_4320 PE=3 SV=1	3.11254e+07	3.39188e+07	2.8453e+07	2.31457e+07	3.1536e+07	4.92176e+07	4.26038e+07	4.4634e+07	5.33414e+07	3.95878e+07
Q8A467	Ribosomal protein L10 OS=Bacteroides thetaiotaomicron (strain ATCC 29148 / DSM 2079 / NCTC 10582 / E50 / VPI-5482) OX=226186 GN=BT_2736 PE=3 SV=1	6.15234e+08	6.12503e+08	5.53608e+08	4.9827e+08	4.96679e+08	6.68731e+08	5.69658e+08	4.76439e+08	6.60714e+08	616339556
Q8A1U8	TonB-dependent receptor OS=Bacteroides thetaiotaomicron (strain ATCC 29148 / DSM 2079 / NCTC 10582 / E50 / VPI-5482) OX=226186 GN=BT_3560 PE=4 SV=1	4.72098e+07	5.56395e+07	4.1716e+07	3.85241e+07	4.73494e+07	3.40303e+07	2.37974e+07	3.26356e+07	4.06042e+07	1.7872e+07
Q8A6B2	Glutamate dehydrogenase OS=Bacteroides thetaiotaomicron (strain ATCC 29148 / DSM 2079 / NCTC 10582 / E50 / VPI-5482) OX=226186 GN=BT_1973 PE=3 SV=1	1.30883e+08	1.05723e+08	1.20443e+08	1.04139e+08	9.12224e+07	7.08643e+07	8.85166e+07	6.68821e+07	7.58279e+07	9.2256e+07
Q8A8L4	Phosphoserine aminotransferase OS=Bacteroides thetaiotaomicron (strain ATCC 29148 / DSM 2079 / NCTC 10582 / E50 / VPI-5482) OX=226186 GN=serC PE=3 SV=1	2.38884e+08	2.84832e+08	2.25156e+08	2.0001e+08	2.3372e+08	2.47918e+08	1.8051e+08	181513350	2.53771e+08	1.76787e+08
Q8A2S3	Gluconate 5-dehydrogenase OS=Bacteroides thetaiotaomicron (strain ATCC 29148 / DSM 2079 / NCTC 10582 / E50 / VPI-5482) OX=226186 GN=BT_3232 PE=4 SV=1	1.86614e+08	1.92551e+08	181212040	1.73278e+08	1.57417e+08	171058709	168846330	1.29716e+08	1.60448e+08	1.82746e+08
Q8A6S7	Putative vitamin B12 receptor OS=Bacteroides thetaiotaomicron (strain ATCC 29148 / DSM 2079 / NCTC 10582 / E50 / VPI-5482) OX=226186 GN=BT_1799 PE=3 SV=1	9.31134e+07	7.71363e+07	7.6162e+07	8.37044e+07	7.08352e+07	3.72804e+07	3.76827e+07	3.74243e+07	4.24148e+07	3.5843e+07
Q8AAB1	Glutamine--fructose-6-phosphate aminotransferase [isomerizing] OS=Bacteroides thetaiotaomicron (strain ATCC 29148 / DSM 2079 / NCTC 10582 / E50 / VPI-5482) OX=226186 GN=glmS PE=3 SV=2	7.11738e+07	9.20865e+07	1.04802e+08	9.50593e+07	7.07841e+07	100980924	1.13104e+08	9.47501e+07	1.05253e+08	5.67936e+07
Q8A0Q9	Glycoside hydrolase family 92 OS=Bacteroides thetaiotaomicron (strain ATCC 29148 / DSM 2079 / NCTC 10582 / E50 / VPI-5482) OX=226186 GN=BT_3962 PE=4 SV=1	2.58825e+07	2.90592e+07	2.1148e+07	1.81436e+07	2.45103e+07	6.46075e+07	4.37495e+07	4.724e+07	6.52167e+07	4.80535e+07
Q8A195	3-oxoacyl-[acyl-carrier-protein] reductase OS=Bacteroides thetaiotaomicron (strain ATCC 29148 / DSM 2079 / NCTC 10582 / E50 / VPI-5482) OX=226186 GN=BT_3771 PE=3 SV=1	477941225	4.89197e+08	479037267	4.76178e+08	4.16956e+08	6.09583e+08	5.17094e+08	4.97463e+08	5.62076e+08	4.10028e+08
Q8A1S9	DNA topoisomerase (ATP-hydrolyzing) OS=Bacteroides thetaiotaomicron (strain ATCC 29148 / DSM 2079 / NCTC 10582 / E50 / VPI-5482) OX=226186 GN=BT_3579 PE=4 SV=1	3.91823e+07	4.35051e+07	3.70115e+07	3.09636e+07	3.99153e+07	5.90583e+07	5.95314e+07	5.41442e+07	5.96414e+07	4.58095e+07
Q8A818	Putative capsule polysaccharide export protein OS=Bacteroides thetaiotaomicron (strain ATCC 29148 / DSM 2079 / NCTC 10582 / E50 / VPI-5482) OX=226186 GN=BT_1356 PE=4 SV=1	9.78481e+07	9.44328e+07	8.58115e+07	7.48031e+07	8.05669e+07	1.04468e+08	9.79027e+07	8.6583e+07	1.08856e+08	1.09591e+08
Q8A473	30S ribosomal protein S7 OS=Bacteroides thetaiotaomicron (strain ATCC 29148 / DSM 2079 / NCTC 10582 / E50 / VPI-5482) OX=226186 GN=rpsG PE=3 SV=1	9.4827e+08	7.62505e+08	8.18913e+08	7.95746e+08	7.82118e+08	8.14005e+08	8.22794e+08	7.51579e+08	8.67266e+08	8.29878e+08
Q8A5Z6	Methylmalonyl-CoA mutase large subunit OS=Bacteroides thetaiotaomicron (strain ATCC 29148 / DSM 2079 / NCTC 10582 / E50 / VPI-5482) OX=226186 GN=BT_2090 PE=4 SV=1	1.01987e+08	9.59524e+07	9.44565e+07	9.10496e+07	8.35267e+07	8.7357e+07	9.09591e+07	8.41817e+07	9.97605e+07	9.13342e+07
Q89YZ1	50S ribosomal protein L25 OS=Bacteroides thetaiotaomicron (strain ATCC 29148 / DSM 2079 / NCTC 10582 / E50 / VPI-5482) OX=226186 GN=rplY PE=3 SV=1	5.32283e+08	5.25308e+08	4.531e+08	5.09435e+08	580146372	6.7274e+08	5.91002e+08	5.74893e+08	5.70745e+08	5.73817e+08
Q45791	Protein RecA OS=Bacteroides thetaiotaomicron (strain ATCC 29148 / DSM 2079 / NCTC 10582 / E50 / VPI-5482) OX=226186 GN=recA PE=3 SV=3	1.54429e+08	1.43496e+08	137703432	1.19235e+08	1.1952e+08	1.94789e+08	1.70778e+08	1.66833e+08	2.00444e+08	2.00269e+08
Q8A2Q0	Putative N6-adenine-specific DNA methylase OS=Bacteroides thetaiotaomicron (strain ATCC 29148 / DSM 2079 / NCTC 10582 / E50 / VPI-5482) OX=226186 GN=BT_3255 PE=4 SV=1	3.47254e+07	45452105	3.26801e+07	2.87095e+07	3.90616e+07	5.38666e+07	4.01797e+07	4.23477e+07	5.13718e+07	3.57623e+07
Q8A2G5	Beta-galactosidase OS=Bacteroides thetaiotaomicron (strain ATCC 29148 / DSM 2079 / NCTC 10582 / E50 / VPI-5482) OX=226186 GN=BT_3340 PE=3 SV=1	4.67173e+07	5.1583e+07	3.68159e+07	3.57104e+07	5.10379e+07	3.99154e+07	3.02714e+07	3.26604e+07	4.07207e+07	3.06657e+07
Q8A6S2	Electron transfer flavoprotein beta-subunit OS=Bacteroides thetaiotaomicron (strain ATCC 29148 / DSM 2079 / NCTC 10582 / E50 / VPI-5482) OX=226186 GN=BT_1804 PE=3 SV=1	1.601e+08	1.36193e+08	1.37837e+08	1.1823e+08	1.11721e+08	1.27554e+08	1.34715e+08	1.06341e+08	1.53407e+08	1.44142e+08
Q8AAU1	Mannose-6-phosphate isomerase OS=Bacteroides thetaiotaomicron (strain ATCC 29148 / DSM 2079 / NCTC 10582 / E50 / VPI-5482) OX=226186 GN=BT_0373 PE=3 SV=1	2.17856e+08	1.95729e+08	1.93106e+08	1.85867e+08	1.7833e+08	1.99988e+08	1.87789e+08	1.72608e+08	2.11982e+08	1.91616e+08
Q8A1L3	Putative modulator of DNA gyrase OS=Bacteroides thetaiotaomicron (strain ATCC 29148 / DSM 2079 / NCTC 10582 / E50 / VPI-5482) OX=226186 GN=BT_3648 PE=3 SV=1	3.81121e+07	5.03679e+07	3.57293e+07	3.34538e+07	4.48617e+07	5.07863e+07	4.0767e+07	4.69892e+07	5.13483e+07	3.32556e+07
Q8A137	3-oxoacyl-[acyl-carrier-protein] synthase 3 protein 2 OS=Bacteroides thetaiotaomicron (strain ATCC 29148 / DSM 2079 / NCTC 10582 / E50 / VPI-5482) OX=226186 GN=fabH2 PE=3 SV=1	1.15462e+08	1.31235e+08	1.16765e+08	110636473	1.3798e+08	1.89242e+08	1.58212e+08	1.73285e+08	1.94259e+08	1.35968e+08
Q8A399	Succinate dehydrogenase iron-sulfur protein OS=Bacteroides thetaiotaomicron (strain ATCC 29148 / DSM 2079 / NCTC 10582 / E50 / VPI-5482) OX=226186 GN=BT_3055 PE=3 SV=1	4.76007e+08	5.40304e+08	4.32439e+08	4.28901e+08	4.56626e+08	6.38887e+08	7.24512e+08	5.63043e+08	6.50735e+08	5.37205e+08
Q8A5H5	Outer membrane protein Omp121 OS=Bacteroides thetaiotaomicron (strain ATCC 29148 / DSM 2079 / NCTC 10582 / E50 / VPI-5482) OX=226186 GN=BT_2264 PE=1 SV=1	3.7837e+07	4.35696e+07	3.47309e+07	3.17972e+07	4.09501e+07	5.54728e+07	4.43061e+07	5.3952e+07	6.3533e+07	3.62323e+07
Q8A2Q1	Dipeptidyl peptidase IV OS=Bacteroides thetaiotaomicron (strain ATCC 29148 / DSM 2079 / NCTC 10582 / E50 / VPI-5482) OX=226186 GN=BT_3254 PE=4 SV=1	3.98232e+07	4.52662e+07	3.92458e+07	3.57929e+07	4.18565e+07	56050977	4.20681e+07	4.70797e+07	5.33313e+07	3.92908e+07
Q8A5S1	Tetracycline resistance protein TetQ OS=Bacteroides thetaiotaomicron (strain ATCC 29148 / DSM 2079 / NCTC 10582 / E50 / VPI-5482) OX=226186 GN=BT_2167 PE=3 SV=1	6.7389e+07	6.27302e+07	6.28822e+07	5.74156e+07	4.97844e+07	3.36677e+07	3.41654e+07	2.69925e+07	3.62234e+07	3.61633e+07
Q8A3W9	Multifunctional fusion protein OS=Bacteroides thetaiotaomicron (strain ATCC 29148 / DSM 2079 / NCTC 10582 / E50 / VPI-5482) OX=226186 GN=secD PE=3 SV=1	2.12302e+08	2.11444e+08	2.03132e+08	1.88265e+08	2.0899e+08	1.63554e+08	1.62752e+08	1.88262e+08	2.10559e+08	1.28771e+08
Q8A3W7	2-oxoglutarate synthase subunit korB OS=Bacteroides thetaiotaomicron (strain ATCC 29148 / DSM 2079 / NCTC 10582 / E50 / VPI-5482) OX=226186 GN=BT_2837 PE=4 SV=1	5.12607e+07	5.89113e+07	4.30687e+07	3.71902e+07	3.9139e+07	4.32926e+07	3.9516e+07	3.11283e+07	47682065	4.48995e+07
Q8A262	Cell division protein FtsZ OS=Bacteroides thetaiotaomicron (strain ATCC 29148 / DSM 2079 / NCTC 10582 / E50 / VPI-5482) OX=226186 GN=ftsZ PE=3 SV=1	6.45594e+07	5.6295e+07	6.88952e+07	5.26609e+07	4.82423e+07	5.7135e+07	6.33072e+07	5.1802e+07	5.46741e+07	5.4323e+07
Q8A6S1	Electron transfer flavoprotein alpha-subunit OS=Bacteroides thetaiotaomicron (strain ATCC 29148 / DSM 2079 / NCTC 10582 / E50 / VPI-5482) OX=226186 GN=BT_1805 PE=1 SV=1	1.30873e+08	1.5872e+08	1.15105e+08	1.08097e+08	1.45243e+08	1.52934e+08	1.57012e+08	1.32332e+08	1.59911e+08	1.19995e+08
Q8A2W0	tRNA-2-methylthio-N(6)-dimethylallyladenosine synthase OS=Bacteroides thetaiotaomicron (strain ATCC 29148 / DSM 2079 / NCTC 10582 / E50 / VPI-5482) OX=226186 GN=miaB PE=3 SV=1	9.91825e+07	105864326	9.51579e+07	9.36301e+07	1.07252e+08	7.88466e+07	8.09726e+07	7.10573e+07	8.29168e+07	6.64224e+07
Q8A6W4	SusD homolog OS=Bacteroides thetaiotaomicron (strain ATCC 29148 / DSM 2079 / NCTC 10582 / E50 / VPI-5482) OX=226186 GN=BT_1762 PE=1 SV=1	1.41132e+08	1.38199e+08	1.34805e+08	1.30469e+08	1.29417e+08	1.1392e+08	9.14326e+07	1.08669e+08	1.1913e+08	9.826e+07
Q8A4S5	Xaa-Pro aminopeptidase OS=Bacteroides thetaiotaomicron (strain ATCC 29148 / DSM 2079 / NCTC 10582 / E50 / VPI-5482) OX=226186 GN=BT_2522 PE=4 SV=1	9.53967e+07	8.81499e+07	8.2177e+07	7.45437e+07	6.58342e+07	7.87237e+07	8.71815e+07	6.36365e+07	8.32694e+07	9.64243e+07
Q8A488	50S ribosomal protein L5 OS=Bacteroides thetaiotaomicron (strain ATCC 29148 / DSM 2079 / NCTC 10582 / E50 / VPI-5482) OX=226186 GN=rplE PE=3 SV=1	2.9234e+08	2.49871e+08	2.50148e+08	248386946	2.35159e+08	2.81825e+08	2.75006e+08	2.35861e+08	2.46894e+08	3.14623e+08
Q8A832	Putative UDP-glucuronic acid epimerase OS=Bacteroides thetaiotaomicron (strain ATCC 29148 / DSM 2079 / NCTC 10582 / E50 / VPI-5482) OX=226186 GN=BT_1342 PE=4 SV=1	2.63168e+07	3.34397e+07	2.16752e+07	2.41515e+07	2.17591e+07	3.08465e+07	2.68868e+07	2.19064e+07	3.58078e+07	2.39349e+07
Q8A9C1	DNA ligase OS=Bacteroides thetaiotaomicron (strain ATCC 29148 / DSM 2079 / NCTC 10582 / E50 / VPI-5482) OX=226186 GN=ligA PE=3 SV=1	4.208e+07	4.10536e+07	4.03912e+07	3.54748e+07	3.88005e+07	5.19828e+07	4.69374e+07	4.35875e+07	5.22539e+07	4.20754e+07
Q8A4V4	ROK family transcriptional repressor, with glucokinase domain OS=Bacteroides thetaiotaomicron (strain ATCC 29148 / DSM 2079 / NCTC 10582 / E50 / VPI-5482) OX=226186 GN=BT_2493 PE=4 SV=1	2.24933e+08	2.73708e+08	2.25566e+08	2.39198e+08	2.68612e+08	2.9944e+08	2.97402e+08	2.85317e+08	2.97291e+08	2.12401e+08
Q8A460	Putative aminopeptidase OS=Bacteroides thetaiotaomicron (strain ATCC 29148 / DSM 2079 / NCTC 10582 / E50 / VPI-5482) OX=226186 GN=BT_2743 PE=3 SV=1	2.84403e+07	4.03769e+07	3.40787e+07	4.09204e+07	3.27361e+07	3.80133e+07	4.11481e+07	2.95138e+07	4.1226e+07	3.38554e+07
Q8AAP6	Outer membrane porin F OS=Bacteroides thetaiotaomicron (strain ATCC 29148 / DSM 2079 / NCTC 10582 / E50 / VPI-5482) OX=226186 GN=BT_0418 PE=4 SV=1	4.06943e+08	3.88821e+08	3.01389e+08	3.07329e+08	4.81091e+08	3.12765e+08	2.1238e+08	4.22564e+08	3.75766e+08	1.81989e+08
Q8A5H0	SusD homolog OS=Bacteroides thetaiotaomicron (strain ATCC 29148 / DSM 2079 / NCTC 10582 / E50 / VPI-5482) OX=226186 GN=BT_2269 PE=3 SV=1	1.32202e+08	1.17109e+08	1.0766e+08	1.13111e+08	1.1927e+08	1.69219e+08	1.30805e+08	1.62531e+08	2.05679e+08	1.55653e+08
Q8A8E5	6-phosphogluconate dehydrogenase, decarboxylating OS=Bacteroides thetaiotaomicron (strain ATCC 29148 / DSM 2079 / NCTC 10582 / E50 / VPI-5482) OX=226186 GN=BT_1222 PE=3 SV=1	4.12447e+07	4.43312e+07	3.73385e+07	3.66335e+07	3.77782e+07	8.27076e+07	7.79788e+07	7.16759e+07	8.19452e+07	8.27361e+07
Q8A9D2	zf-RING_7 domain-containing protein OS=Bacteroides thetaiotaomicron (strain ATCC 29148 / DSM 2079 / NCTC 10582 / E50 / VPI-5482) OX=226186 GN=BT_0883 PE=4 SV=1	1.70171e+08	1.81405e+08	1.89324e+08	1.56816e+08	1.8627e+08	2.71951e+08	2.65907e+08	2.4988e+08	279327009	2.11872e+08
Q8A588	Uncharacterized protein OS=Bacteroides thetaiotaomicron (strain ATCC 29148 / DSM 2079 / NCTC 10582 / E50 / VPI-5482) OX=226186 GN=BT_2354 PE=4 SV=1	2.33513e+07	3.09253e+07	2.49944e+07	2.20394e+07	2.43973e+07	3.14836e+07	2.58903e+07	2.67098e+07	3.69182e+07	2.55984e+07
Q8A2X3	Rubrerythrin OS=Bacteroides thetaiotaomicron (strain ATCC 29148 / DSM 2079 / NCTC 10582 / E50 / VPI-5482) OX=226186 GN=BT_3182 PE=4 SV=1	1.59668e+08	1.38199e+08	1.23081e+08	1.11906e+08	1.10786e+08	1.58015e+08	1.05425e+08	1.21571e+08	1.3348e+08	1.52199e+08
Q8A5K9	DNA polymerase III subunit alpha OS=Bacteroides thetaiotaomicron (strain ATCC 29148 / DSM 2079 / NCTC 10582 / E50 / VPI-5482) OX=226186 GN=BT_2230 PE=4 SV=1	2.61903e+07	3.21525e+07	2.88955e+07	2.52726e+07	2.50717e+07	4.55039e+07	3.86662e+07	3.38352e+07	3.65109e+07	3.39285e+07
Q8A670	dTDP-glucose 4,6-dehydratase OS=Bacteroides thetaiotaomicron (strain ATCC 29148 / DSM 2079 / NCTC 10582 / E50 / VPI-5482) OX=226186 GN=BT_2016 PE=3 SV=1	1.19541e+08	1.24968e+08	9.95119e+07	1.04503e+08	1.06797e+08	1.3262e+08	1.24273e+08	1.1575e+08	1.37777e+08	1.20902e+08
Q89YZ8	Amidophosphoribosyltransferase OS=Bacteroides thetaiotaomicron (strain ATCC 29148 / DSM 2079 / NCTC 10582 / E50 / VPI-5482) OX=226186 GN=BT_4582 PE=3 SV=1	2.04713e+08	1.78011e+08	1.86693e+08	1.85707e+08	1.84621e+08	2.38999e+08	2.22944e+08	201971090	2.34247e+08	2.39727e+08
Q8A123	Peptidyl-prolyl cis-trans isomerase OS=Bacteroides thetaiotaomicron (strain ATCC 29148 / DSM 2079 / NCTC 10582 / E50 / VPI-5482) OX=226186 GN=BT_3848 PE=4 SV=1	6.76328e+07	1.0343e+08	7.61037e+07	6.33331e+07	8.35941e+07	9.09018e+07	7.69542e+07	7.52638e+07	9.19622e+07	5.9794e+07
Q8A8E6	Glucose-6-phosphate 1-dehydrogenase OS=Bacteroides thetaiotaomicron (strain ATCC 29148 / DSM 2079 / NCTC 10582 / E50 / VPI-5482) OX=226186 GN=zwf PE=3 SV=1	3.6292e+07	3.80333e+07	3.10775e+07	3.1043e+07	3.11184e+07	6.43575e+07	6.6061e+07	4.57157e+07	7.36696e+07	5.50259e+07
Q8A5I1	GTPase HflX OS=Bacteroides thetaiotaomicron (strain ATCC 29148 / DSM 2079 / NCTC 10582 / E50 / VPI-5482) OX=226186 GN=hflX PE=3 SV=1	6.12576e+07	6.713e+07	6.07055e+07	5.83925e+07	5.42189e+07	5.68577e+07	5.09883e+07	4.25894e+07	5.7886e+07	4.88992e+07
Q8A406	Carboxy-terminal processing protease OS=Bacteroides thetaiotaomicron (strain ATCC 29148 / DSM 2079 / NCTC 10582 / E50 / VPI-5482) OX=226186 GN=BT_2798 PE=3 SV=1	5.27497e+07	4.62685e+07	4.57331e+07	4.28139e+07	4.51033e+07	4.75042e+07	4.83247e+07	4.38718e+07	4.85637e+07	4.94869e+07
Q8A577	SusD homolog OS=Bacteroides thetaiotaomicron (strain ATCC 29148 / DSM 2079 / NCTC 10582 / E50 / VPI-5482) OX=226186 GN=BT_2365 PE=1 SV=1	8.41349e+07	9.19803e+07	8.25215e+07	7.30643e+07	6.76194e+07	2.12931e+07	2.11888e+07	1.83565e+07	2.3013e+07	2.04731e+07
Q8A4T7	Malate dehydrogenase OS=Bacteroides thetaiotaomicron (strain ATCC 29148 / DSM 2079 / NCTC 10582 / E50 / VPI-5482) OX=226186 GN=BT_2510 PE=3 SV=1	1.10654e+08	1.77496e+08	1.09846e+08	1.2659e+08	1.09133e+08	1.44192e+08	173316136	1.24846e+08	1.53155e+08	1.16008e+08
Q8AB74	Dipeptidyl-peptidase OS=Bacteroides thetaiotaomicron (strain ATCC 29148 / DSM 2079 / NCTC 10582 / E50 / VPI-5482) OX=226186 GN=BT_0236 PE=3 SV=1	6.80099e+07	6.51159e+07	6.43591e+07	5.28059e+07	5.96033e+07	6.96541e+07	6.09194e+07	5.41353e+07	6.3379e+07	6.49171e+07
Q8A6B7	Multidrug efflux protein OS=Bacteroides thetaiotaomicron (strain ATCC 29148 / DSM 2079 / NCTC 10582 / E50 / VPI-5482) OX=226186 GN=BT_1967 PE=3 SV=1	1.27826e+08	1.20561e+08	116771563	1.02506e+08	9.41951e+07	NA	688870	1.37275e+06	85560.1	919118
Q8A804	NAD dependent nucleotide-diphosphate-sugar epimerase OS=Bacteroides thetaiotaomicron (strain ATCC 29148 / DSM 2079 / NCTC 10582 / E50 / VPI-5482) OX=226186 GN=BT_1370 PE=4 SV=1	4.9821e+07	5.12283e+07	5.41858e+07	4.71199e+07	3.85405e+07	6.63361e+07	4.85233e+07	4.07874e+07	7.19319e+07	6.10604e+07
Q8A6W9	Fructokinase OS=Bacteroides thetaiotaomicron (strain ATCC 29148 / DSM 2079 / NCTC 10582 / E50 / VPI-5482) OX=226186 GN=BT_1757 PE=1 SV=1	3.2723e+08	2.75183e+08	2.87836e+08	2.49158e+08	1.95815e+08	2.00205e+08	2.49303e+08	1.46084e+08	2.44646e+08	2.72914e+08
Q8A5S3	Two-component system response regulator OS=Bacteroides thetaiotaomicron (strain ATCC 29148 / DSM 2079 / NCTC 10582 / E50 / VPI-5482) OX=226186 GN=BT_2165 PE=4 SV=1	3.59807e+08	4.40467e+08	4.02633e+08	2.86464e+08	3.50137e+08	4.0235e+08	3.76984e+08	3.29493e+08	4.3521e+08	4.20262e+08
Q8A7F0	Putative outer membrane protein OS=Bacteroides thetaiotaomicron (strain ATCC 29148 / DSM 2079 / NCTC 10582 / E50 / VPI-5482) OX=226186 GN=BT_1574 PE=4 SV=1	7.03349e+07	6.59941e+07	6.05678e+07	5.25427e+07	5.59361e+07	4.55441e+07	4.72651e+07	4.57271e+07	50014210	4.71761e+07
Q8A375	Cysteine synthase OS=Bacteroides thetaiotaomicron (strain ATCC 29148 / DSM 2079 / NCTC 10582 / E50 / VPI-5482) OX=226186 GN=BT_3080 PE=3 SV=1	2.71174e+08	2.33531e+08	2.71983e+08	205579931	1.96642e+08	1.53111e+08	1.60155e+08	1.03152e+08	1.59494e+08	1.7386e+08
Q8A0H4	Alpha-2-macroglobulin-like protein OS=Bacteroides thetaiotaomicron (strain ATCC 29148 / DSM 2079 / NCTC 10582 / E50 / VPI-5482) OX=226186 GN=BT_4047 PE=3 SV=1	2.80038e+07	2.54655e+07	2.42559e+07	1.9827e+07	2.06441e+07	2.1393e+07	1.8918e+07	1.86218e+07	2.27062e+07	2.35663e+07
Q8A2F0	Putative auxin-regulated protein OS=Bacteroides thetaiotaomicron (strain ATCC 29148 / DSM 2079 / NCTC 10582 / E50 / VPI-5482) OX=226186 GN=BT_3355 PE=4 SV=1	8.68087e+07	8.26571e+07	7.50208e+07	8.10679e+07	7.73581e+07	4.43361e+07	4.35816e+07	3.83207e+07	4.44458e+07	4.537e+07
Q8A876	V-type ATP synthase subunit B OS=Bacteroides thetaiotaomicron (strain ATCC 29148 / DSM 2079 / NCTC 10582 / E50 / VPI-5482) OX=226186 GN=BT_1298 PE=3 SV=1	7.14609e+07	8.83625e+07	6.35339e+07	5.47516e+07	5.87445e+07	5.62044e+07	5.67691e+07	4.3532e+07	5.8525e+07	4.80877e+07
Q89YY5	DUF5606 domain-containing protein OS=Bacteroides thetaiotaomicron (strain ATCC 29148 / DSM 2079 / NCTC 10582 / E50 / VPI-5482) OX=226186 GN=BT_4595 PE=4 SV=1	5.85496e+07	8.14291e+07	5.18902e+07	5.2283e+07	6.75834e+07	141434110	9.47749e+07	9.86839e+07	1.4195e+08	9.01533e+07
Q8A8D9	Fructose-1,6-bisphosphatase class 3 OS=Bacteroides thetaiotaomicron (strain ATCC 29148 / DSM 2079 / NCTC 10582 / E50 / VPI-5482) OX=226186 GN=fbp PE=3 SV=1	3.13047e+07	2.89589e+07	2.7936e+07	2.8685e+07	2.72348e+07	3.43601e+07	2.891e+07	2.84213e+07	3.19379e+07	3.03805e+07
Q8A7B8	Bifunctional protein FolD OS=Bacteroides thetaiotaomicron (strain ATCC 29148 / DSM 2079 / NCTC 10582 / E50 / VPI-5482) OX=226186 GN=folD PE=3 SV=1	4.43449e+07	3.86032e+07	3.30713e+07	3.63072e+07	3.88302e+07	4.70217e+07	4.97851e+07	4.05035e+07	4.64365e+07	4.20547e+07
Q8A9J0	Altronate oxidoreductase OS=Bacteroides thetaiotaomicron (strain ATCC 29148 / DSM 2079 / NCTC 10582 / E50 / VPI-5482) OX=226186 GN=uxaB PE=3 SV=1	4.98169e+07	4.58979e+07	4.03413e+07	3.77769e+07	8.13684e+07	1.12559e+08	4.32891e+07	1.02308e+08	1.08236e+08	4.09417e+07
Q8A2U1	S-adenosylmethionine:tRNA ribosyltransferase-isomerase OS=Bacteroides thetaiotaomicron (strain ATCC 29148 / DSM 2079 / NCTC 10582 / E50 / VPI-5482) OX=226186 GN=queA PE=3 SV=1	1.4046e+08	1.33609e+08	1.29207e+08	1.17294e+08	1.24733e+08	159337214	1.55051e+08	1.52657e+08	1.65388e+08	1.78498e+08
Q8AAU2	Aldose 1-epimerase OS=Bacteroides thetaiotaomicron (strain ATCC 29148 / DSM 2079 / NCTC 10582 / E50 / VPI-5482) OX=226186 GN=BT_0372 PE=3 SV=1	67465928	6.30314e+07	6.33451e+07	4.70242e+07	5.13476e+07	4.76234e+07	4.90292e+07	4.48816e+07	5.06526e+07	5.58563e+07
Q8A6L6	2-isopropylmalate synthase OS=Bacteroides thetaiotaomicron (strain ATCC 29148 / DSM 2079 / NCTC 10582 / E50 / VPI-5482) OX=226186 GN=leuA PE=3 SV=1	4.18683e+07	3.57762e+07	3.99114e+07	3.4034e+07	2.94993e+07	3.3079e+07	3.70425e+07	2.94173e+07	3.36599e+07	4.18751e+07
Q8A254	UDP-N-acetylmuramoyl-L-alanyl-D-glutamate--2,6-diaminopimelate ligase OS=Bacteroides thetaiotaomicron (strain ATCC 29148 / DSM 2079 / NCTC 10582 / E50 / VPI-5482) OX=226186 GN=murE PE=3 SV=1	4.39844e+07	5.21519e+07	4.65348e+07	4.36258e+07	6.61113e+07	8.5264e+07	6.35196e+07	7.62771e+07	6.3933e+07	4.82877e+07
Q8A1B1	Acetyl-coenzyme A synthetase OS=Bacteroides thetaiotaomicron (strain ATCC 29148 / DSM 2079 / NCTC 10582 / E50 / VPI-5482) OX=226186 GN=BT_3755 PE=4 SV=1	4.97593e+07	4.26627e+07	4.89642e+07	3.84176e+07	3.68303e+07	5.29226e+07	5.57585e+07	4.55161e+07	5.73574e+07	5.87543e+07
Q8ABD0	Methionine synthase OS=Bacteroides thetaiotaomicron (strain ATCC 29148 / DSM 2079 / NCTC 10582 / E50 / VPI-5482) OX=226186 GN=BT_0180 PE=1 SV=1	1.69369e+07	1.72428e+07	1.60773e+07	1.41385e+07	1.42702e+07	1.92928e+07	1.84491e+07	1.47877e+07	2.50926e+07	1.85838e+07
Q8A6G1	O-acetylhomoserine (Thiol)-lyase OS=Bacteroides thetaiotaomicron (strain ATCC 29148 / DSM 2079 / NCTC 10582 / E50 / VPI-5482) OX=226186 GN=BT_1923 PE=3 SV=1	1.07746e+08	1.25318e+08	8.49961e+07	7.60415e+07	1.09864e+08	1.41187e+08	112884549	1.04956e+08	1.37581e+08	9.07868e+07
Q8A8E3	GDP-mannose 4,6-dehydratase OS=Bacteroides thetaiotaomicron (strain ATCC 29148 / DSM 2079 / NCTC 10582 / E50 / VPI-5482) OX=226186 GN=gmd PE=3 SV=1	8.10045e+07	7.36635e+07	7.21534e+07	6.82743e+07	7.65589e+07	9.68486e+07	7.19032e+07	8.05155e+07	8.21606e+07	8.00406e+07
Q8A5J0	Ribosome-recycling factor OS=Bacteroides thetaiotaomicron (strain ATCC 29148 / DSM 2079 / NCTC 10582 / E50 / VPI-5482) OX=226186 GN=frr PE=3 SV=1	1.5178e+08	1.41185e+08	1.59884e+08	112093844	1.24086e+08	1.58276e+08	1.43844e+08	1.26663e+08	1.682e+08	1.87558e+08
Q8A2X1	L-aspartate oxidase OS=Bacteroides thetaiotaomicron (strain ATCC 29148 / DSM 2079 / NCTC 10582 / E50 / VPI-5482) OX=226186 GN=BT_3184 PE=3 SV=1	2.42056e+07	2.23916e+07	28547219	2.08275e+07	2.23299e+07	2.58814e+07	2.03486e+07	1.86034e+07	2.35142e+07	2.89781e+07
Q89YW7	Uncharacterized protein OS=Bacteroides thetaiotaomicron (strain ATCC 29148 / DSM 2079 / NCTC 10582 / E50 / VPI-5482) OX=226186 GN=BT_4614 PE=4 SV=1	2.079e+08	2.15601e+08	180959940	1.42973e+08	1.59122e+08	115604088	1.19814e+08	105610696	1.33235e+08	1.20684e+08
Q8A8G0	Glycerate dehydrogenase (NADH-dependent) OS=Bacteroides thetaiotaomicron (strain ATCC 29148 / DSM 2079 / NCTC 10582 / E50 / VPI-5482) OX=226186 GN=BT_1207 PE=3 SV=1	6.75235e+07	7.14979e+07	5.80897e+07	6.33173e+07	5.83087e+07	6.39288e+07	5.29684e+07	5.3327e+07	6.26226e+07	6.68526e+07
Q8A5S5	30S ribosomal protein S6 OS=Bacteroides thetaiotaomicron (strain ATCC 29148 / DSM 2079 / NCTC 10582 / E50 / VPI-5482) OX=226186 GN=rpsF PE=3 SV=1	1.53729e+08	4.46548e+08	2.22625e+08	1.76035e+08	3.33127e+08	4.10632e+08	385757454	3.43075e+08	4.74609e+08	2.63813e+08
Q8A334	DNA mismatch repair protein MutS OS=Bacteroides thetaiotaomicron (strain ATCC 29148 / DSM 2079 / NCTC 10582 / E50 / VPI-5482) OX=226186 GN=mutS PE=3 SV=1	2.88936e+07	2.62363e+07	2.76074e+07	2.11105e+07	2.1991e+07	2.82479e+07	2.57455e+07	2.05819e+07	2.95942e+07	2.57682e+07
Q8AB94	Putative rubrerythrin OS=Bacteroides thetaiotaomicron (strain ATCC 29148 / DSM 2079 / NCTC 10582 / E50 / VPI-5482) OX=226186 GN=BT_0216 PE=4 SV=1	4.53529e+08	3.53476e+08	3.90561e+08	3.20949e+08	2.49511e+08	2.36611e+08	3.09329e+08	221282580	276700420	232987523
Q8A5T1	Probable secreted glycosyl hydrolase OS=Bacteroides thetaiotaomicron (strain ATCC 29148 / DSM 2079 / NCTC 10582 / E50 / VPI-5482) OX=226186 GN=BT_2157 PE=1 SV=1	149357320	1.53297e+08	1.26058e+08	1.03666e+08	1.28831e+08	1.3942e+08	1.21626e+08	1.413e+08	1.65574e+08	1.32011e+08
Q89ZR9	Putative glycogen synthase OS=Bacteroides thetaiotaomicron (strain ATCC 29148 / DSM 2079 / NCTC 10582 / E50 / VPI-5482) OX=226186 GN=BT_4307 PE=4 SV=1	1.00341e+08	1.23191e+08	9.01266e+07	7.28391e+07	109186022	1.19331e+08	8.86178e+07	1.03897e+08	1.23489e+08	8.50961e+07
Q8AAQ0	Sulfate adenylyltransferase subunit 2 OS=Bacteroides thetaiotaomicron (strain ATCC 29148 / DSM 2079 / NCTC 10582 / E50 / VPI-5482) OX=226186 GN=cysD PE=3 SV=1	8.41899e+07	9.82562e+07	7.3319e+07	6.4559e+07	7.06431e+07	5.12657e+07	4.76492e+07	3.96168e+07	5.33878e+07	4.06676e+07
Q8A815	Tetratricopeptide repeat family protein OS=Bacteroides thetaiotaomicron (strain ATCC 29148 / DSM 2079 / NCTC 10582 / E50 / VPI-5482) OX=226186 GN=BT_1359 PE=4 SV=1	6.30598e+07	7.32168e+07	6.93782e+07	6.33587e+07	6.08977e+07	8.62653e+07	8.96852e+07	7.25232e+07	8.39932e+07	8.2754e+07
Q8A256	UDP-N-acetylmuramoylalanine--D-glutamate ligase OS=Bacteroides thetaiotaomicron (strain ATCC 29148 / DSM 2079 / NCTC 10582 / E50 / VPI-5482) OX=226186 GN=murD PE=3 SV=2	5.44839e+07	5.02171e+07	5.11188e+07	3.99644e+07	4.12409e+07	4.35946e+07	4.49915e+07	38077754	4.60133e+07	4.71117e+07
Q8A012	Orotidine 5'-phosphate decarboxylase OS=Bacteroides thetaiotaomicron (strain ATCC 29148 / DSM 2079 / NCTC 10582 / E50 / VPI-5482) OX=226186 GN=pyrF PE=3 SV=1	1.4014e+08	1.30819e+08	1.26386e+08	1.16104e+08	1.16759e+08	1.51688e+08	1.7915e+08	136346922	1.45651e+08	161355342
Q8A7N6	Putative cell surface protein OS=Bacteroides thetaiotaomicron (strain ATCC 29148 / DSM 2079 / NCTC 10582 / E50 / VPI-5482) OX=226186 GN=BT_1488 PE=4 SV=1	5.30053e+07	5.26341e+07	4.77834e+07	3.54467e+07	5.88527e+07	1.19172e+08	9.58642e+07	1.21434e+08	1.10169e+08	9.88347e+07
Q8A7N8	Quinoprotein amine dehydrogenase-like protein OS=Bacteroides thetaiotaomicron (strain ATCC 29148 / DSM 2079 / NCTC 10582 / E50 / VPI-5482) OX=226186 GN=BT_1486 PE=4 SV=1	1.33924e+08	1.34255e+08	1.04708e+08	1.07671e+08	1.14926e+08	1.84845e+08	1.53878e+08	1.52867e+08	1.93953e+08	1.25218e+08
Q8A010	AIR synthase OS=Bacteroides thetaiotaomicron (strain ATCC 29148 / DSM 2079 / NCTC 10582 / E50 / VPI-5482) OX=226186 GN=BT_4211 PE=3 SV=1	7.90472e+07	8.26868e+07	6.58653e+07	5.51844e+07	6.92459e+07	9.41656e+07	9.19788e+07	8.11956e+07	9.11795e+07	8.79777e+07
Q8A128	ATP-dependent Clp protease ATP-binding subunit ClpX OS=Bacteroides thetaiotaomicron (strain ATCC 29148 / DSM 2079 / NCTC 10582 / E50 / VPI-5482) OX=226186 GN=clpX PE=3 SV=1	8.56709e+07	8.03087e+07	7.74311e+07	6.88428e+07	6.95794e+07	9.31635e+07	9.77812e+07	7.79074e+07	9.42181e+07	9.45855e+07
Q8A0V3	Pyridoxine 5'-phosphate synthase OS=Bacteroides thetaiotaomicron (strain ATCC 29148 / DSM 2079 / NCTC 10582 / E50 / VPI-5482) OX=226186 GN=pdxJ PE=3 SV=1	5.15948e+07	5.05045e+07	4.58755e+07	3.40693e+07	3.54297e+07	4.54996e+07	4.03184e+07	3.11716e+07	5.10917e+07	3.96224e+07
Q8A154	Cell shape-determining protein MreB OS=Bacteroides thetaiotaomicron (strain ATCC 29148 / DSM 2079 / NCTC 10582 / E50 / VPI-5482) OX=226186 GN=mreB PE=3 SV=1	1.25431e+08	1.19984e+08	1.29961e+08	9.82599e+07	1.02855e+08	1.129e+08	1.0179e+08	9.13242e+07	1.25807e+08	1.13666e+08
Q8A728	Pyruvate carboxylase subunit B OS=Bacteroides thetaiotaomicron (strain ATCC 29148 / DSM 2079 / NCTC 10582 / E50 / VPI-5482) OX=226186 GN=BT_1697 PE=4 SV=1	5.30925e+07	6.1788e+07	4.89119e+07	4.38522e+07	4.54275e+07	4.69827e+07	3.55941e+07	4.02725e+07	3.87004e+07	3.3706e+07
Q8A310	Uncharacterized protein OS=Bacteroides thetaiotaomicron (strain ATCC 29148 / DSM 2079 / NCTC 10582 / E50 / VPI-5482) OX=226186 GN=BT_3145 PE=4 SV=1	7.65261e+07	7.05994e+07	7.54464e+07	6.09881e+07	6.19068e+07	9.08568e+07	109888715	9.32205e+07	1.02615e+08	112132682
Q8A624	ATP-dependent 6-phosphofructokinase 2 OS=Bacteroides thetaiotaomicron (strain ATCC 29148 / DSM 2079 / NCTC 10582 / E50 / VPI-5482) OX=226186 GN=pfkA2 PE=3 SV=1	148784093	1.80313e+08	1.38494e+08	1.40275e+08	1.62596e+08	1.66999e+08	1.32343e+08	1.52841e+08	1.61995e+08	1.02724e+08
Q8AAE7	Bifunctional purine biosynthesis protein, putative 5-aminoimidazole-4-carboxamide ribonucleotide(AICAR) transformylase/IMP cyclohydrolase OS=Bacteroides thetaiotaomicron (strain ATCC 29148 / DSM 2079 / NCTC 10582 / E50 / VPI-5482) OX=226186 GN=BT_0518 PE=4 SV=1	1.02729e+08	8.78532e+07	9.19346e+07	8.15877e+07	7.65077e+07	1.09786e+08	1.15741e+08	9.46777e+07	110260181	1.00713e+08
G8JZS4	Glucan 1,4-alpha-glucosidase SusB OS=Bacteroides thetaiotaomicron (strain ATCC 29148 / DSM 2079 / NCTC 10582 / E50 / VPI-5482) OX=226186 GN=susB PE=1 SV=1	4.53179e+07	4.40979e+07	4.73335e+07	4.19145e+07	3.53448e+07	3.50812e+07	4.8793e+07	3.92052e+07	3.85934e+07	3.72813e+07
Q8A261	Cell division protein FtsA OS=Bacteroides thetaiotaomicron (strain ATCC 29148 / DSM 2079 / NCTC 10582 / E50 / VPI-5482) OX=226186 GN=ftsA PE=3 SV=1	7.67764e+07	7.83596e+07	7.76845e+07	7.49129e+07	8.09296e+07	9.33901e+07	8.13535e+07	8.08081e+07	1.00848e+08	9.13944e+07
Q8A9P2	Alpha-amylase 3 OS=Bacteroides thetaiotaomicron (strain ATCC 29148 / DSM 2079 / NCTC 10582 / E50 / VPI-5482) OX=226186 GN=BT_0773 PE=4 SV=1	4.86053e+07	4.30491e+07	4.21009e+07	3.76314e+07	3.87375e+07	4.23236e+07	4.35383e+07	3.13169e+07	4.56627e+07	4.87047e+07
Q8A1G9	Phosphate acetyltransferase OS=Bacteroides thetaiotaomicron (strain ATCC 29148 / DSM 2079 / NCTC 10582 / E50 / VPI-5482) OX=226186 GN=BT_3692 PE=3 SV=1	3.00515e+08	2.74243e+08	2.58922e+08	2.76799e+08	2.39873e+08	3.0592e+08	3.19765e+08	2.69357e+08	3.09313e+08	3.28898e+08
Q8A9W1	Formate-dependent phosphoribosylglycinamide formyltransferase OS=Bacteroides thetaiotaomicron (strain ATCC 29148 / DSM 2079 / NCTC 10582 / E50 / VPI-5482) OX=226186 GN=purT PE=3 SV=1	1.016e+08	9.60841e+07	1.0526e+08	8.92802e+07	8.62651e+07	1.06643e+08	1.13941e+08	9.15722e+07	1.13012e+08	1.16563e+08
Q8A015	Bifunctional enzyme LpxC/FabZ OS=Bacteroides thetaiotaomicron (strain ATCC 29148 / DSM 2079 / NCTC 10582 / E50 / VPI-5482) OX=226186 GN=lpxC/fabZ PE=3 SV=1	1.56122e+08	156603206	1.46409e+08	1.31556e+08	138185842	1.5781e+08	1.51041e+08	132740526	1.71977e+08	1.75717e+08
Q8A092	Outer membrane assembly protein OS=Bacteroides thetaiotaomicron (strain ATCC 29148 / DSM 2079 / NCTC 10582 / E50 / VPI-5482) OX=226186 GN=BT_4129 PE=4 SV=1	4.34252e+07	4.94685e+07	4.13902e+07	4.93413e+07	4.54767e+07	3.32847e+07	3.10169e+07	3.25653e+07	4.17124e+07	2.96306e+07
Q8A477	50S ribosomal protein L4 OS=Bacteroides thetaiotaomicron (strain ATCC 29148 / DSM 2079 / NCTC 10582 / E50 / VPI-5482) OX=226186 GN=rplD PE=3 SV=1	7.29281e+08	6.84397e+08	6.72635e+08	6.07142e+08	6.52604e+08	8.8634e+08	7.50218e+08	8.04755e+08	9.16792e+08	7.11167e+08
Q8AAY1	Ketoisovalerate oxidoreductase subunit vorB OS=Bacteroides thetaiotaomicron (strain ATCC 29148 / DSM 2079 / NCTC 10582 / E50 / VPI-5482) OX=226186 GN=BT_0331 PE=4 SV=1	5.21116e+07	7.3361e+07	5.1332e+07	4.82897e+07	6.27896e+07	7.81375e+07	4.52137e+07	5.16706e+07	7.78046e+07	5.22944e+07
Q8A2K2	ATP-dependent RNA helicase OS=Bacteroides thetaiotaomicron (strain ATCC 29148 / DSM 2079 / NCTC 10582 / E50 / VPI-5482) OX=226186 GN=BT_3303 PE=3 SV=1	4.22801e+07	3.7443e+07	3.89926e+07	3.43638e+07	3.3093e+07	4.32733e+07	3.66654e+07	3.55601e+07	4.16105e+07	4.01963e+07
Q8AA78	Prolyl oligopeptidase family protein OS=Bacteroides thetaiotaomicron (strain ATCC 29148 / DSM 2079 / NCTC 10582 / E50 / VPI-5482) OX=226186 GN=BT_0587 PE=3 SV=1	2.30923e+07	2.818e+07	2.33138e+07	2.27831e+07	2.50962e+07	2.14585e+07	1.53924e+07	2.11917e+07	2.49159e+07	1.51556e+07
Q8A9U7	ATP synthase subunit alpha OS=Bacteroides thetaiotaomicron (strain ATCC 29148 / DSM 2079 / NCTC 10582 / E50 / VPI-5482) OX=226186 GN=atpA PE=3 SV=1	1.94478e+08	1.79131e+08	1.80572e+08	1.61967e+08	1.66605e+08	4.95663e+07	3.75947e+07	4.55268e+07	5.07218e+07	44647439
Q8A2N7	tRNA uridine 5-carboxymethylaminomethyl modification enzyme MnmG OS=Bacteroides thetaiotaomicron (strain ATCC 29148 / DSM 2079 / NCTC 10582 / E50 / VPI-5482) OX=226186 GN=mnmG PE=3 SV=1	2.73536e+07	3.14026e+07	2.77634e+07	2.67303e+07	2.71034e+07	3.2249e+07	3.14552e+07	2.42629e+07	3.31825e+07	2.72683e+07
Q8A247	Hemolysin A OS=Bacteroides thetaiotaomicron (strain ATCC 29148 / DSM 2079 / NCTC 10582 / E50 / VPI-5482) OX=226186 GN=BT_3459 PE=4 SV=1	3.93102e+07	5.48906e+07	3.88946e+07	3.86412e+07	4.14424e+07	5.51011e+07	4.47489e+07	3.83719e+07	5.2562e+07	4.21031e+07
Q8A2L1	Putative alpha-glucosidase OS=Bacteroides thetaiotaomicron (strain ATCC 29148 / DSM 2079 / NCTC 10582 / E50 / VPI-5482) OX=226186 GN=BT_3294 PE=4 SV=1	2.2955e+07	2.52317e+07	2.20761e+07	1.91052e+07	2.30916e+07	3.36848e+07	2.40496e+07	2.6412e+07	2.96421e+07	2.38433e+07
Q8A2G6	AcrA/AcrE family multidrug resistance protein OS=Bacteroides thetaiotaomicron (strain ATCC 29148 / DSM 2079 / NCTC 10582 / E50 / VPI-5482) OX=226186 GN=BT_3339 PE=3 SV=1	8.61074e+07	8.59237e+07	8.18923e+07	6.39631e+07	7.92685e+07	4.83208e+07	3.87601e+07	5.26036e+07	5.97477e+07	3.90642e+07
Q8AAB0	Amidophosphoribosyltransferase OS=Bacteroides thetaiotaomicron (strain ATCC 29148 / DSM 2079 / NCTC 10582 / E50 / VPI-5482) OX=226186 GN=BT_0555 PE=4 SV=1	6.25786e+07	4.49924e+07	4.78937e+07	4.84918e+07	4.53522e+07	4.92066e+07	5.51637e+07	4.42135e+07	5.37241e+07	5.97953e+07
Q8A9S8	Formate--tetrahydrofolate ligase OS=Bacteroides thetaiotaomicron (strain ATCC 29148 / DSM 2079 / NCTC 10582 / E50 / VPI-5482) OX=226186 GN=fhs PE=3 SV=1	4.38321e+07	4.34096e+07	3.69419e+07	3.41737e+07	3.99171e+07	5.37457e+07	5.40364e+07	4.85106e+07	5.07234e+07	4.80287e+07
Q8A135	GTPase Der OS=Bacteroides thetaiotaomicron (strain ATCC 29148 / DSM 2079 / NCTC 10582 / E50 / VPI-5482) OX=226186 GN=der PE=3 SV=1	5.39772e+07	6.74409e+07	4.93197e+07	4.37604e+07	5.97729e+07	9.95702e+07	8.55552e+07	7.37608e+07	1.04054e+08	6.6686e+07
Q89YZ7	Peptidase T OS=Bacteroides thetaiotaomicron (strain ATCC 29148 / DSM 2079 / NCTC 10582 / E50 / VPI-5482) OX=226186 GN=pepT PE=3 SV=1	4.52455e+07	5.39611e+07	4.03861e+07	3.87748e+07	5.6238e+07	7.28124e+07	5.45231e+07	6.94435e+07	6.94463e+07	4.67242e+07
Q8A3H7	Peptidyl-prolyl cis-trans isomerase OS=Bacteroides thetaiotaomicron (strain ATCC 29148 / DSM 2079 / NCTC 10582 / E50 / VPI-5482) OX=226186 GN=BT_2977 PE=3 SV=1	257072924	2.61668e+08	2.69182e+08	246538643	2.86721e+08	2.52161e+08	1.95571e+08	2.42436e+08	262606777	2.12407e+08
Q8AAN4	Indolepyruvate oxidoreductase subunit IorA OS=Bacteroides thetaiotaomicron (strain ATCC 29148 / DSM 2079 / NCTC 10582 / E50 / VPI-5482) OX=226186 GN=BT_0430 PE=4 SV=1	3.58551e+07	4.11227e+07	3.61778e+07	3.44187e+07	3.98352e+07	5.46938e+07	5.11467e+07	5.08563e+07	5.51762e+07	4.27314e+07
Q8A8V9	Two-component system sensor histidine kinase OS=Bacteroides thetaiotaomicron (strain ATCC 29148 / DSM 2079 / NCTC 10582 / E50 / VPI-5482) OX=226186 GN=BT_1058 PE=4 SV=1	2.80789e+07	2.67491e+07	2.36005e+07	2.13933e+07	1.74948e+07	3.54629e+07	3.6285e+07	2.79761e+07	3.54391e+07	3.14566e+07
Q8A309	TenA family transcriptional activator-like protein OS=Bacteroides thetaiotaomicron (strain ATCC 29148 / DSM 2079 / NCTC 10582 / E50 / VPI-5482) OX=226186 GN=BT_3146 PE=1 SV=1	8.99698e+07	8.28707e+07	7.38263e+07	7.14227e+07	6.95736e+07	9.65432e+07	9.6153e+07	5.94969e+07	94854505	9.22591e+07
Q8A259	UDP-N-acetylmuramate--L-alanine ligase OS=Bacteroides thetaiotaomicron (strain ATCC 29148 / DSM 2079 / NCTC 10582 / E50 / VPI-5482) OX=226186 GN=murC PE=3 SV=1	2.94468e+07	3.2098e+07	2.76658e+07	2.93262e+07	2.70614e+07	3.34545e+07	4.05087e+07	2.76919e+07	3.75028e+07	3.1719e+07
Q8A1D5	Orotate phosphoribosyltransferase OS=Bacteroides thetaiotaomicron (strain ATCC 29148 / DSM 2079 / NCTC 10582 / E50 / VPI-5482) OX=226186 GN=pyrE PE=3 SV=1	4.06331e+07	5.80478e+07	3.08457e+07	3.07334e+07	3.34438e+07	5.98976e+07	3.42312e+07	3.36595e+07	5.65094e+07	4.33386e+07
Q8AA87	Excinuclease ABC subunit A OS=Bacteroides thetaiotaomicron (strain ATCC 29148 / DSM 2079 / NCTC 10582 / E50 / VPI-5482) OX=226186 GN=BT_0578 PE=4 SV=1	4.57916e+07	4.01829e+07	3.96624e+07	3.69695e+07	3.69348e+07	4.13358e+07	3.65495e+07	2.86806e+07	4.13964e+07	4.31733e+07
Q8A1U9	Endonuclease/exonuclease/phosphatase family OS=Bacteroides thetaiotaomicron (strain ATCC 29148 / DSM 2079 / NCTC 10582 / E50 / VPI-5482) OX=226186 GN=BT_3559 PE=4 SV=1	5.54322e+07	4.82563e+07	4.88215e+07	4.41347e+07	3.94037e+07	5.55993e+07	5.22184e+07	4.33177e+07	5.7762e+07	6.88592e+07
Q8A3N0	Acetyl-CoA synthetase OS=Bacteroides thetaiotaomicron (strain ATCC 29148 / DSM 2079 / NCTC 10582 / E50 / VPI-5482) OX=226186 GN=BT_2924 PE=4 SV=1	2.47159e+07	2.42545e+07	2.31959e+07	2.05776e+07	2.2136e+07	2.56111e+07	2.47433e+07	1.95135e+07	27853299	2.50773e+07
Q8ABG1	Peptidase OS=Bacteroides thetaiotaomicron (strain ATCC 29148 / DSM 2079 / NCTC 10582 / E50 / VPI-5482) OX=226186 GN=BT_0149 PE=3 SV=1	4.56313e+07	4.88603e+07	4.71408e+07	3.41294e+07	5.00804e+07	7.81568e+07	5.6115e+07	6.59221e+07	6.33255e+07	5.45345e+07
Q8A6Z6	Peptide chain release factor 3 OS=Bacteroides thetaiotaomicron (strain ATCC 29148 / DSM 2079 / NCTC 10582 / E50 / VPI-5482) OX=226186 GN=prfC PE=3 SV=1	1.23396e+08	1.05201e+08	1.01902e+08	1.03569e+08	8.90573e+07	1.03887e+08	1.07762e+08	8.55289e+07	1.05976e+08	1.10031e+08
Q8A1L7	UDP-N-acetylmuramoyl-tripeptide--D-alanyl-D-alanine ligase OS=Bacteroides thetaiotaomicron (strain ATCC 29148 / DSM 2079 / NCTC 10582 / E50 / VPI-5482) OX=226186 GN=murF PE=3 SV=1	2.6557e+07	2.75353e+07	2.53429e+07	2.28695e+07	2.28319e+07	2.91312e+07	2.52873e+07	1.85895e+07	3.09551e+07	2.69356e+07
Q8A7H2	SusC homolog OS=Bacteroides thetaiotaomicron (strain ATCC 29148 / DSM 2079 / NCTC 10582 / E50 / VPI-5482) OX=226186 GN=BT_1552 PE=3 SV=1	2.98195e+07	2.59336e+07	2.77995e+07	2.30189e+07	2.20852e+07	2.03462e+07	2.08575e+07	2.02786e+07	2.52665e+07	2.07476e+07
Q8AA10	Superoxide dismutase OS=Bacteroides thetaiotaomicron (strain ATCC 29148 / DSM 2079 / NCTC 10582 / E50 / VPI-5482) OX=226186 GN=BT_0655 PE=3 SV=1	4.29267e+07	4.54702e+07	3.01657e+07	3.53541e+07	2.98342e+07	3.00019e+07	2.94548e+07	2.58064e+07	4.04322e+07	3.48179e+07
Q8A633	Uncharacterized protein OS=Bacteroides thetaiotaomicron (strain ATCC 29148 / DSM 2079 / NCTC 10582 / E50 / VPI-5482) OX=226186 GN=BT_2053 PE=3 SV=1	6.56973e+07	6.55778e+07	6.92964e+07	4.37535e+07	5.21813e+07	5.36443e+07	6.26662e+07	5.8845e+07	7.6377e+07	7.59327e+07
Q89YQ1	Endonuclease MutS2 OS=Bacteroides thetaiotaomicron (strain ATCC 29148 / DSM 2079 / NCTC 10582 / E50 / VPI-5482) OX=226186 GN=mutS2 PE=3 SV=1	2.04108e+07	1.70347e+07	1.67119e+07	1.56742e+07	1.4385e+07	2.04137e+07	1.78816e+07	1.83137e+07	2.14641e+07	2.22416e+07
Q8A833	UDP-glucose 6-dehydrogenase OS=Bacteroides thetaiotaomicron (strain ATCC 29148 / DSM 2079 / NCTC 10582 / E50 / VPI-5482) OX=226186 GN=BT_1341 PE=3 SV=1	7.68999e+07	8.46113e+07	6.95301e+07	6.54344e+07	7.23906e+07	9.52687e+07	7.93249e+07	8.98001e+07	9.44034e+07	7.54987e+07
Q8A383	Collagenase OS=Bacteroides thetaiotaomicron (strain ATCC 29148 / DSM 2079 / NCTC 10582 / E50 / VPI-5482) OX=226186 GN=BT_3072 PE=4 SV=1	4.66572e+07	4.29395e+07	4.76288e+07	4.23625e+07	3.74736e+07	4.60114e+07	4.60742e+07	3.80603e+07	4.17014e+07	4.3065e+07
Q8A7H5	Dipeptidase OS=Bacteroides thetaiotaomicron (strain ATCC 29148 / DSM 2079 / NCTC 10582 / E50 / VPI-5482) OX=226186 GN=BT_1549 PE=3 SV=1	3.80704e+07	3.87476e+07	3.31903e+07	2.84333e+07	3.44323e+07	4.94606e+07	4.62783e+07	3.96833e+07	4.96797e+07	4.84287e+07
Q8AA92	Lipoprotein protein, putative OS=Bacteroides thetaiotaomicron (strain ATCC 29148 / DSM 2079 / NCTC 10582 / E50 / VPI-5482) OX=226186 GN=BT_0573 PE=4 SV=1	2.65891e+07	2.66619e+07	2.36369e+07	2.3155e+07	2.006e+07	2.71891e+07	2.33833e+07	2.03329e+07	3.18579e+07	2.3411e+07
Q8A016	Acyl-[acyl-carrier-protein]--UDP-N-acetylglucosamine O-acyltransferase OS=Bacteroides thetaiotaomicron (strain ATCC 29148 / DSM 2079 / NCTC 10582 / E50 / VPI-5482) OX=226186 GN=BT_4205 PE=4 SV=1	7.25779e+07	6.73065e+07	6.61902e+07	5.82781e+07	6.00675e+07	6.63786e+07	6.52468e+07	5.41166e+07	7.29174e+07	6.39604e+07
Q8A6Y8	Putative secreted protein OS=Bacteroides thetaiotaomicron (strain ATCC 29148 / DSM 2079 / NCTC 10582 / E50 / VPI-5482) OX=226186 GN=BT_1737 PE=3 SV=1	3.47093e+07	4.07659e+07	2.91428e+07	3.25534e+07	3.46964e+07	3.57076e+07	3.34368e+07	3.02502e+07	3.96577e+07	3.05338e+07
Q8A7N7	Quinonprotein alcohol dehydrogenase-like protein OS=Bacteroides thetaiotaomicron (strain ATCC 29148 / DSM 2079 / NCTC 10582 / E50 / VPI-5482) OX=226186 GN=BT_1487 PE=1 SV=1	1.26872e+08	1.24677e+08	1.1314e+08	112402328	1.20755e+08	211945463	1.99898e+08	2.06598e+08	2.07812e+08	1.97424e+08
Q8A0T4	TPR domain-containing protein OS=Bacteroides thetaiotaomicron (strain ATCC 29148 / DSM 2079 / NCTC 10582 / E50 / VPI-5482) OX=226186 GN=BT_3937 PE=4 SV=1	3.49883e+07	3.14337e+07	2.52786e+07	2.30278e+07	2.78923e+07	3.36074e+07	2.66554e+07	2.10968e+07	3.48266e+07	3.39641e+07
Q8A5Q9	Putative DNA mismatch repair protein OS=Bacteroides thetaiotaomicron (strain ATCC 29148 / DSM 2079 / NCTC 10582 / E50 / VPI-5482) OX=226186 GN=BT_2179 PE=1 SV=1	4.00346e+07	3.97191e+07	4.03597e+07	3.44321e+07	3.44954e+07	4.22948e+07	3.81781e+07	3.56588e+07	44533768	4.22987e+07
Q8A6K0	Purine nucleoside phosphorylase OS=Bacteroides thetaiotaomicron (strain ATCC 29148 / DSM 2079 / NCTC 10582 / E50 / VPI-5482) OX=226186 GN=BT_1881 PE=3 SV=1	3.82284e+07	4.87277e+07	3.36044e+07	2.67295e+07	3.96525e+07	5.30008e+07	4.19883e+07	4.95777e+07	5.59916e+07	3.98008e+07
Q8A2J1	Thermostable beta-glucosidase B OS=Bacteroides thetaiotaomicron (strain ATCC 29148 / DSM 2079 / NCTC 10582 / E50 / VPI-5482) OX=226186 GN=BT_3314 PE=3 SV=1	2.90129e+07	3.09074e+07	2.92925e+07	3.11419e+07	2.54276e+07	3.7687e+07	4.63396e+07	3.35745e+07	3.83244e+07	3.71893e+07
Q89ZP0	Thioredoxin reductase OS=Bacteroides thetaiotaomicron (strain ATCC 29148 / DSM 2079 / NCTC 10582 / E50 / VPI-5482) OX=226186 GN=BT_4336 PE=3 SV=1	5.41964e+07	5.78288e+07	5.36649e+07	4.48691e+07	4.5643e+07	5.72461e+07	6.25787e+07	4.65905e+07	6.37334e+07	6.00414e+07
Q8A2L2	Beta-galactosidase OS=Bacteroides thetaiotaomicron (strain ATCC 29148 / DSM 2079 / NCTC 10582 / E50 / VPI-5482) OX=226186 GN=BT_3293 PE=3 SV=1	1.98974e+07	2.14831e+07	2.02195e+07	1.70399e+07	1.76449e+07	2.13928e+07	17710217	1.62263e+07	1.9959e+07	1.95354e+07
Q8A5S9	Putative oxidoreductase OS=Bacteroides thetaiotaomicron (strain ATCC 29148 / DSM 2079 / NCTC 10582 / E50 / VPI-5482) OX=226186 GN=BT_2159 PE=4 SV=1	2.37066e+07	2.78107e+07	2.40918e+07	2.36247e+07	2.14275e+07	40725060	4.06625e+07	3.32462e+07	4.49657e+07	5.17757e+07
Q89ZG0	Ribonuclease Y OS=Bacteroides thetaiotaomicron (strain ATCC 29148 / DSM 2079 / NCTC 10582 / E50 / VPI-5482) OX=226186 GN=rny PE=3 SV=1	6.42775e+07	5.08325e+07	5.00036e+07	4.77303e+07	4.95665e+07	3.42804e+07	3.06619e+07	4.51158e+07	4.87664e+07	3.63876e+07
Q8A0R2	SusD homolog OS=Bacteroides thetaiotaomicron (strain ATCC 29148 / DSM 2079 / NCTC 10582 / E50 / VPI-5482) OX=226186 GN=BT_3959 PE=3 SV=1	1.36677e+07	1.69282e+07	1.24428e+07	1.28483e+07	1.53101e+07	3.35015e+07	2.77688e+07	3.12482e+07	3.44129e+07	2.71053e+07
Q89ZS0	Uncharacterized protein OS=Bacteroides thetaiotaomicron (strain ATCC 29148 / DSM 2079 / NCTC 10582 / E50 / VPI-5482) OX=226186 GN=BT_4306 PE=4 SV=1	5.75664e+07	7.487e+07	6.15758e+07	6.65913e+07	6.21436e+07	7.52789e+07	9.27173e+07	7.71396e+07	8.50119e+07	6.14762e+07
Q8A6L7	3-isopropylmalate dehydratase large subunit OS=Bacteroides thetaiotaomicron (strain ATCC 29148 / DSM 2079 / NCTC 10582 / E50 / VPI-5482) OX=226186 GN=leuC PE=3 SV=1	7.27696e+07	6.84689e+07	6.22892e+07	6.58425e+07	6.0991e+07	7.37496e+07	7.63632e+07	6.1439e+07	7.31326e+07	7.84653e+07
Q8A7M5	DNA-binding protein HU OS=Bacteroides thetaiotaomicron (strain ATCC 29148 / DSM 2079 / NCTC 10582 / E50 / VPI-5482) OX=226186 GN=BT_1499 PE=3 SV=1	4.39712e+08	4.43388e+08	4.11341e+08	3.52502e+08	3.48076e+08	5.66613e+08	6.05224e+08	4.79096e+08	625314938	5.74332e+08
Q8A678	YicC-like family protein OS=Bacteroides thetaiotaomicron (strain ATCC 29148 / DSM 2079 / NCTC 10582 / E50 / VPI-5482) OX=226186 GN=BT_2008 PE=4 SV=1	7.05464e+07	5.76419e+07	5.74764e+07	4.80576e+07	4.86342e+07	6.02036e+07	4.93509e+07	4.4506e+07	6.14348e+07	4.79801e+07
Q8A0Q6	Putative alpha-1,2-mannosidase OS=Bacteroides thetaiotaomicron (strain ATCC 29148 / DSM 2079 / NCTC 10582 / E50 / VPI-5482) OX=226186 GN=BT_3965 PE=1 SV=1	2.57479e+07	1.38347e+07	2.38249e+07	2.34157e+07	2.37488e+07	5.22734e+07	43974426	3.16978e+07	5.37264e+07	3.81164e+07
Q8A8C3	Chaperone protein DnaJ OS=Bacteroides thetaiotaomicron (strain ATCC 29148 / DSM 2079 / NCTC 10582 / E50 / VPI-5482) OX=226186 GN=dnaJ PE=3 SV=1	3.70869e+07	4.173e+07	3.27381e+07	2.88557e+07	2.85365e+07	3.45848e+07	4.88907e+07	3.33615e+07	3.78255e+07	2.99918e+07
Q8A5T8	Methylglyoxal synthase OS=Bacteroides thetaiotaomicron (strain ATCC 29148 / DSM 2079 / NCTC 10582 / E50 / VPI-5482) OX=226186 GN=mgsA PE=3 SV=1	4.89846e+07	5.32367e+07	4.10101e+07	3.86243e+07	4.05679e+07	3.97477e+07	3.24658e+07	3.47832e+07	4.77671e+07	4.25149e+07
Q89ZA3	Uncharacterized protein OS=Bacteroides thetaiotaomicron (strain ATCC 29148 / DSM 2079 / NCTC 10582 / E50 / VPI-5482) OX=226186 GN=BT_4474 PE=4 SV=1	3.51469e+07	3.06168e+07	3.15812e+07	2.80075e+07	2.75517e+07	3.08432e+07	3.10232e+07	2.87945e+07	3.14603e+07	3.70601e+07
Q8A2Z1	Quinolinate synthase A OS=Bacteroides thetaiotaomicron (strain ATCC 29148 / DSM 2079 / NCTC 10582 / E50 / VPI-5482) OX=226186 GN=nadA PE=3 SV=1	4.31887e+07	3.84834e+07	4.08439e+07	3.86373e+07	3.03913e+07	3.99978e+07	4.84306e+07	3.47794e+07	5.87811e+07	5.37774e+07
Q8A1U6	Uncharacterized protein OS=Bacteroides thetaiotaomicron (strain ATCC 29148 / DSM 2079 / NCTC 10582 / E50 / VPI-5482) OX=226186 GN=BT_3562 PE=4 SV=1	1.47376e+08	1.58622e+08	1.34984e+08	1.33584e+08	1.39798e+08	9.9449e+07	8.64388e+07	1.05299e+08	1.23729e+08	8.03839e+07
Q8A1E1	Putative outer membrane protein OS=Bacteroides thetaiotaomicron (strain ATCC 29148 / DSM 2079 / NCTC 10582 / E50 / VPI-5482) OX=226186 GN=BT_3725 PE=4 SV=1	3.59744e+07	3.53619e+07	3.47012e+07	3.01419e+07	3.02781e+07	3.6434e+07	3.46974e+07	3.18989e+07	4.44261e+07	3.88682e+07
Q8AA22	Uncharacterized RNA methyltransferase BT_0643 OS=Bacteroides thetaiotaomicron (strain ATCC 29148 / DSM 2079 / NCTC 10582 / E50 / VPI-5482) OX=226186 GN=BT_0643 PE=3 SV=1	3.9767e+07	3.47541e+07	3.43163e+07	3.16836e+07	2.97053e+07	44465012	4.95577e+07	3.76109e+07	4.39979e+07	5.07478e+07
Q8A4A1	30S ribosomal protein S4 OS=Bacteroides thetaiotaomicron (strain ATCC 29148 / DSM 2079 / NCTC 10582 / E50 / VPI-5482) OX=226186 GN=rpsD PE=3 SV=1	8.24747e+08	8.63563e+08	8.85474e+08	8.10292e+08	8.3363e+08	1075491679	983586974	1016283099	1126699204	8.26806e+08
Q8A840	PhoH-like protein OS=Bacteroides thetaiotaomicron (strain ATCC 29148 / DSM 2079 / NCTC 10582 / E50 / VPI-5482) OX=226186 GN=BT_1334 PE=4 SV=1	1.91292e+07	2.09176e+07	2.00624e+07	1.4604e+07	1.57397e+07	1.05042e+07	8.11086e+06	8.53098e+06	1.24798e+07	9.83466e+06
Q8A468	50S ribosomal protein L7/L12 OS=Bacteroides thetaiotaomicron (strain ATCC 29148 / DSM 2079 / NCTC 10582 / E50 / VPI-5482) OX=226186 GN=rplL PE=3 SV=1	1771514801	2015203195	1630685402	1444792316	2021515206	2528775309	2777424189	2493239432	2364256192	2060888248
Q8A298	ABC transporter ATP-binding protein OS=Bacteroides thetaiotaomicron (strain ATCC 29148 / DSM 2079 / NCTC 10582 / E50 / VPI-5482) OX=226186 GN=BT_3407 PE=3 SV=1	7.17901e+07	7.43903e+07	7.06617e+07	6.2062e+07	7.27724e+07	8.51526e+07	6.98371e+07	7.00902e+07	7.91474e+07	7.78496e+07
Q89ZS3	Glycogen debranching enzyme-related protein (4-alpha-glucanotransferase) OS=Bacteroides thetaiotaomicron (strain ATCC 29148 / DSM 2079 / NCTC 10582 / E50 / VPI-5482) OX=226186 GN=BT_4303 PE=4 SV=1	2.19502e+07	2.18741e+07	1.96853e+07	1.97172e+07	1.78578e+07	1.66965e+07	1.72384e+07	1.48449e+07	1.82508e+07	1.34873e+07
Q8A495	50S ribosomal protein L15 OS=Bacteroides thetaiotaomicron (strain ATCC 29148 / DSM 2079 / NCTC 10582 / E50 / VPI-5482) OX=226186 GN=rplO PE=3 SV=1	6.58055e+08	6.31633e+08	6.8953e+08	5.78958e+08	5.60107e+08	733755117	692718542	704397511	7.58905e+08	8.69323e+08
Q8A2P2	2-deoxy-D-ribose 5-phosphate aldolase OS=Bacteroides thetaiotaomicron (strain ATCC 29148 / DSM 2079 / NCTC 10582 / E50 / VPI-5482) OX=226186 GN=BT_3263 PE=4 SV=1	1.01075e+08	1.13566e+08	9.52624e+07	8.04276e+07	7.84654e+07	1.08247e+08	6.46398e+07	7.81747e+07	1.07929e+08	9.08619e+07
Q8A0Q8	Glycoside hydrolase family 92 OS=Bacteroides thetaiotaomicron (strain ATCC 29148 / DSM 2079 / NCTC 10582 / E50 / VPI-5482) OX=226186 GN=BT_3963 PE=4 SV=1	1.27695e+07	1.17978e+07	1.26207e+07	1.07157e+07	1.0647e+07	2.22139e+07	2.68961e+07	2.07508e+07	2.56355e+07	2.81036e+07
Q8A843	Uncharacterized protein OS=Bacteroides thetaiotaomicron (strain ATCC 29148 / DSM 2079 / NCTC 10582 / E50 / VPI-5482) OX=226186 GN=BT_1331 PE=4 SV=1	103657740	1.06256e+08	9.84045e+07	8.57256e+07	8.49934e+07	1.03378e+08	1.03592e+08	8.25568e+07	1.0538e+08	1.1211e+08
Q89ZJ5	Uncharacterized protein OS=Bacteroides thetaiotaomicron (strain ATCC 29148 / DSM 2079 / NCTC 10582 / E50 / VPI-5482) OX=226186 GN=BT_4382 PE=4 SV=1	3.61016e+07	4.4075e+07	3.84181e+07	3.1895e+07	3.31914e+07	3.50347e+07	3.67249e+07	2.8514e+07	3.96108e+07	31848468
Q8A6I8	Putative cell surface antigen OS=Bacteroides thetaiotaomicron (strain ATCC 29148 / DSM 2079 / NCTC 10582 / E50 / VPI-5482) OX=226186 GN=BT_1896 PE=4 SV=1	5.90456e+07	4.46547e+07	4.62814e+07	45651172	43382396	2.24436e+08	2.41799e+08	1.82479e+08	2.16674e+08	2.55469e+08
Q8A1E3	Putative outer membrane protein OmpH OS=Bacteroides thetaiotaomicron (strain ATCC 29148 / DSM 2079 / NCTC 10582 / E50 / VPI-5482) OX=226186 GN=BT_3723 PE=3 SV=1	3.20022e+08	3.47709e+08	3.03674e+08	2.6699e+08	3.01478e+08	3.96015e+08	3.90283e+08	3.70804e+08	3.87057e+08	2.85222e+08
Q8AAQ3	3'(2'),5'-bisphosphate nucleotidase CysQ OS=Bacteroides thetaiotaomicron (strain ATCC 29148 / DSM 2079 / NCTC 10582 / E50 / VPI-5482) OX=226186 GN=cysQ PE=1 SV=1	4.05002e+07	3.57931e+07	3.41874e+07	2.74343e+07	3.21895e+07	1.96458e+07	1.76764e+07	1.61472e+07	1.90267e+07	2.19352e+07
Q8A6N1	Putative dipeptidyl-peptidase III OS=Bacteroides thetaiotaomicron (strain ATCC 29148 / DSM 2079 / NCTC 10582 / E50 / VPI-5482) OX=226186 GN=BT_1846 PE=1 SV=1	2.89132e+07	2.96742e+07	2.44139e+07	2.34169e+07	25841215	2.89488e+07	2.57569e+07	2.60284e+07	3.35351e+07	2.45487e+07
Q8A5Z5	Methylmalonyl-CoA mutase OS=Bacteroides thetaiotaomicron (strain ATCC 29148 / DSM 2079 / NCTC 10582 / E50 / VPI-5482) OX=226186 GN=BT_2091 PE=3 SV=1	4.37203e+07	4.75952e+07	4.51374e+07	4.0306e+07	4.41667e+07	4.31859e+07	3.64247e+07	3.61826e+07	4.6624e+07	3.32431e+07
Q8A299	ABC transporter permease OS=Bacteroides thetaiotaomicron (strain ATCC 29148 / DSM 2079 / NCTC 10582 / E50 / VPI-5482) OX=226186 GN=BT_3406 PE=3 SV=1	3.89321e+07	4.55272e+07	3.31802e+07	3.05599e+07	3.46397e+07	4.21875e+07	3.63977e+07	3.66957e+07	3.60139e+07	3.87692e+07
Q8AAA0	Putative heat shock protein OS=Bacteroides thetaiotaomicron (strain ATCC 29148 / DSM 2079 / NCTC 10582 / E50 / VPI-5482) OX=226186 GN=BT_0565 PE=3 SV=1	387405824	3.29877e+08	4.31741e+08	2.8408e+08	3.18893e+08	1.98175e+08	2.08549e+08	183804687	187584303	2.25041e+08
Q8A9Z1	Carboxynorspermidine/carboxyspermidine decarboxylase OS=Bacteroides thetaiotaomicron (strain ATCC 29148 / DSM 2079 / NCTC 10582 / E50 / VPI-5482) OX=226186 GN=BT_0674 PE=4 SV=1	3.3856e+07	3.16314e+07	3.00214e+07	2.41436e+07	2.70977e+07	2.32542e+07	2.16406e+07	1.76937e+07	2.40486e+07	2.71736e+07
Q8A297	Uncharacterized protein OS=Bacteroides thetaiotaomicron (strain ATCC 29148 / DSM 2079 / NCTC 10582 / E50 / VPI-5482) OX=226186 GN=BT_3408 PE=3 SV=1	3.79738e+07	3.28359e+07	3.79649e+07	2.85628e+07	2.80854e+07	3.62118e+07	3.2333e+07	2.99529e+07	3.95318e+07	3.8819e+07
Q8A8M0	Glycine dehydrogenase (decarboxylating) OS=Bacteroides thetaiotaomicron (strain ATCC 29148 / DSM 2079 / NCTC 10582 / E50 / VPI-5482) OX=226186 GN=gcvP PE=3 SV=1	2.31176e+07	2.43496e+07	2.01243e+07	1.90554e+07	1.93516e+07	2.45387e+07	2.35041e+07	2.04958e+07	2.59363e+07	2.33324e+07
Q8A482	30S ribosomal protein S3 OS=Bacteroides thetaiotaomicron (strain ATCC 29148 / DSM 2079 / NCTC 10582 / E50 / VPI-5482) OX=226186 GN=rpsC PE=3 SV=1	316268972	3.75871e+08	2.62548e+08	2.59214e+08	3.41505e+08	2.85345e+08	2.64856e+08	337599792	3.14209e+08	2.17208e+08
Q8A9Y1	Putative long-chain-fatty-acid--CoA ligase OS=Bacteroides thetaiotaomicron (strain ATCC 29148 / DSM 2079 / NCTC 10582 / E50 / VPI-5482) OX=226186 GN=BT_0684 PE=4 SV=1	2.38073e+07	2.65999e+07	2.53601e+07	2.01502e+07	2.11462e+07	1.81925e+07	1.92874e+07	1.49864e+07	1.8036e+07	1.5871e+07
Q8A1D9	Uncharacterized protein OS=Bacteroides thetaiotaomicron (strain ATCC 29148 / DSM 2079 / NCTC 10582 / E50 / VPI-5482) OX=226186 GN=BT_3727 PE=4 SV=1	7.25611e+07	6.29032e+07	6.42564e+07	5.53394e+07	5.28208e+07	7.72427e+07	7.96432e+07	6.36724e+07	7.7845e+07	1.00848e+08
Q8A8I2	OmpA-related protein OS=Bacteroides thetaiotaomicron (strain ATCC 29148 / DSM 2079 / NCTC 10582 / E50 / VPI-5482) OX=226186 GN=BT_1185 PE=4 SV=1	2.09412e+07	2.21508e+07	1.56745e+07	1.71433e+07	2.05702e+07	3.26876e+07	2.40832e+07	2.96555e+07	3.35539e+07	1.80446e+07
Q8A9L1	Putative carbon-nitrogen hydrolase OS=Bacteroides thetaiotaomicron (strain ATCC 29148 / DSM 2079 / NCTC 10582 / E50 / VPI-5482) OX=226186 GN=BT_0804 PE=3 SV=1	1.15421e+07	1.67131e+07	1.30843e+07	1.14723e+07	1.5701e+07	1.86396e+07	1.17772e+07	1.44459e+07	1.97575e+07	1.0738e+07
Q8A513	Pyridine nucleotide-disulphide oxidoreductase OS=Bacteroides thetaiotaomicron (strain ATCC 29148 / DSM 2079 / NCTC 10582 / E50 / VPI-5482) OX=226186 GN=BT_2434 PE=3 SV=1	1.23085e+07	1.92387e+07	1.40477e+07	1.07282e+07	1.78716e+07	2.88103e+07	2.29142e+07	2.50537e+07	3.1541e+07	2.00845e+07
Q8A3H6	Transcriptional regulator OS=Bacteroides thetaiotaomicron (strain ATCC 29148 / DSM 2079 / NCTC 10582 / E50 / VPI-5482) OX=226186 GN=BT_2978 PE=4 SV=1	6.76472e+07	9.23125e+07	5.39109e+07	5.46579e+07	6.58374e+07	8.36735e+07	6.38887e+07	6.52967e+07	8.48784e+07	6.4137e+07
Q89YN0	2-succinyl-5-enolpyruvyl-6-hydroxy-3-cyclohexene-1-carboxylate synthase OS=Bacteroides thetaiotaomicron (strain ATCC 29148 / DSM 2079 / NCTC 10582 / E50 / VPI-5482) OX=226186 GN=menD PE=3 SV=1	2.62128e+07	1.86609e+07	2.28674e+07	1.84598e+07	1.96647e+07	2.59959e+07	2.48496e+07	1.91174e+07	2.67841e+07	2.72161e+07
Q8A616	Citrate synthase OS=Bacteroides thetaiotaomicron (strain ATCC 29148 / DSM 2079 / NCTC 10582 / E50 / VPI-5482) OX=226186 GN=BT_2070 PE=3 SV=1	3.16879e+07	5.39874e+07	5.51672e+07	5.43766e+07	4.49472e+07	7.47237e+07	5.56658e+07	3.51026e+07	7.84292e+07	4.75329e+07
Q89Z39	Site-specific DNA-methyltransferase (adenine-specific) OS=Bacteroides thetaiotaomicron (strain ATCC 29148 / DSM 2079 / NCTC 10582 / E50 / VPI-5482) OX=226186 GN=BT_4538 PE=3 SV=1	2.89162e+07	2.69617e+07	2.32376e+07	2.22855e+07	1.95982e+07	2.91782e+07	2.72054e+07	2.04622e+07	2.67957e+07	3.05686e+07
Q8A014	UDP-3-O-acylglucosamine N-acyltransferase OS=Bacteroides thetaiotaomicron (strain ATCC 29148 / DSM 2079 / NCTC 10582 / E50 / VPI-5482) OX=226186 GN=lpxD PE=3 SV=1	5.88598e+07	69328637	5.53065e+07	5.60783e+07	5.8535e+07	7.34065e+07	1.03002e+08	7.11167e+07	7.82487e+07	7.67803e+07
Q8A4T0	4-hydroxy-3-methylbut-2-en-1-yl diphosphate synthase (flavodoxin) OS=Bacteroides thetaiotaomicron (strain ATCC 29148 / DSM 2079 / NCTC 10582 / E50 / VPI-5482) OX=226186 GN=ispG PE=3 SV=1	1.71555e+07	2.38173e+07	1.73513e+07	1.86156e+07	2.02903e+07	2.47844e+07	2.66944e+07	2.34756e+07	2.92688e+07	1.73874e+07
Q8A146	Methylenetetrahydrofolate reductase OS=Bacteroides thetaiotaomicron (strain ATCC 29148 / DSM 2079 / NCTC 10582 / E50 / VPI-5482) OX=226186 GN=BT_3821 PE=3 SV=1	2.47436e+07	2.65605e+07	2.60417e+07	1.81083e+07	2.18161e+07	4.7355e+07	4.79832e+07	3.37746e+07	4.86531e+07	4.59738e+07
Q8A5G7	Uncharacterized protein OS=Bacteroides thetaiotaomicron (strain ATCC 29148 / DSM 2079 / NCTC 10582 / E50 / VPI-5482) OX=226186 GN=BT_2272 PE=4 SV=1	2.16903e+08	1.918e+08	1.78958e+08	1.68383e+08	1.75027e+08	9.32914e+07	7.69003e+07	9.8413e+07	1.18271e+08	9.83439e+07
Q8A6N0	Transcriptional regulator, AraC/XylS family OS=Bacteroides thetaiotaomicron (strain ATCC 29148 / DSM 2079 / NCTC 10582 / E50 / VPI-5482) OX=226186 GN=BT_1847 PE=4 SV=1	3.4267e+08	2.63485e+08	2.87281e+08	2.67553e+08	2.60551e+08	286692670	2.58853e+08	2.8562e+08	2.69077e+08	3.20889e+08
Q8A608	Dihydroxy-acid dehydratase OS=Bacteroides thetaiotaomicron (strain ATCC 29148 / DSM 2079 / NCTC 10582 / E50 / VPI-5482) OX=226186 GN=ilvD PE=3 SV=1	3.04547e+07	2.91514e+07	2.9113e+07	2.58088e+07	2.561e+07	3.12557e+07	2.57721e+07	2.26401e+07	3.4251e+07	3.41894e+07
Q8A296	Cysteine desulfurase OS=Bacteroides thetaiotaomicron (strain ATCC 29148 / DSM 2079 / NCTC 10582 / E50 / VPI-5482) OX=226186 GN=BT_3409 PE=3 SV=1	2.12526e+07	1.96367e+07	2.16097e+07	1.52494e+07	2.08654e+07	2.30785e+07	1.97655e+07	1.95525e+07	2.27528e+07	2.02911e+07
Q8A705	Phosphoenolpyruvate phosphomutase OS=Bacteroides thetaiotaomicron (strain ATCC 29148 / DSM 2079 / NCTC 10582 / E50 / VPI-5482) OX=226186 GN=BT_1720 PE=4 SV=1	2.10985e+07	2.18724e+07	1.92581e+07	2.0667e+07	1.95891e+07	2.20344e+07	2.00983e+07	1.83141e+07	2.25544e+07	1.85571e+07
Q89Z26	tRNA modification GTPase MnmE OS=Bacteroides thetaiotaomicron (strain ATCC 29148 / DSM 2079 / NCTC 10582 / E50 / VPI-5482) OX=226186 GN=mnmE PE=3 SV=1	1.36029e+07	2.32092e+07	1.99581e+07	1.42572e+07	1.74054e+07	2.04069e+07	2.06202e+07	1.90043e+07	2.41159e+07	1.75015e+07
Q8AAP4	Peptide deformylase OS=Bacteroides thetaiotaomicron (strain ATCC 29148 / DSM 2079 / NCTC 10582 / E50 / VPI-5482) OX=226186 GN=def PE=3 SV=1	5.72833e+07	6.20976e+07	5.5498e+07	4.87963e+07	4.7335e+07	7.48462e+07	6.37471e+07	4.85991e+07	8.13353e+07	5.79398e+07
Q8A405	Putative PfkB family carbohydrate kinase OS=Bacteroides thetaiotaomicron (strain ATCC 29148 / DSM 2079 / NCTC 10582 / E50 / VPI-5482) OX=226186 GN=BT_2799 PE=4 SV=1	3.74889e+08	3.59671e+08	3.54834e+08	3.5844e+08	3.41523e+08	3.74547e+08	3.14654e+08	2.88384e+08	2.95384e+08	3.50153e+08
Q8A237	Probable secreted glycosyl hydrolase OS=Bacteroides thetaiotaomicron (strain ATCC 29148 / DSM 2079 / NCTC 10582 / E50 / VPI-5482) OX=226186 GN=BT_3469 PE=1 SV=1	4.32155e+07	4.41541e+07	3.71249e+07	3.98479e+07	4.14134e+07	4.21733e+07	4.307e+07	3.65659e+07	4.06134e+07	3.67726e+07
Q8A4A3	50S ribosomal protein L17 OS=Bacteroides thetaiotaomicron (strain ATCC 29148 / DSM 2079 / NCTC 10582 / E50 / VPI-5482) OX=226186 GN=rplQ PE=3 SV=1	1008361280	7.90338e+08	8.21421e+08	8.42936e+08	8.26721e+08	8.7621e+08	8.14678e+08	879415920	815290428	8.48539e+08
Q8A0M0	Putative chromosome partitioning protein parB OS=Bacteroides thetaiotaomicron (strain ATCC 29148 / DSM 2079 / NCTC 10582 / E50 / VPI-5482) OX=226186 GN=BT_4001 PE=3 SV=1	3.43999e+07	3.24296e+07	3.09283e+07	2.75205e+07	2.80468e+07	3.60746e+07	3.66725e+07	3.16916e+07	4.11933e+07	3.68774e+07
Q8A1C1	PCMD domain-containing protein OS=Bacteroides thetaiotaomicron (strain ATCC 29148 / DSM 2079 / NCTC 10582 / E50 / VPI-5482) OX=226186 GN=BT_3745 PE=1 SV=1	4.99862e+07	3.98748e+07	4.29292e+07	3.56555e+07	3.59956e+07	2.89683e+07	3.18329e+07	2.89936e+07	3.26937e+07	2.31209e+07
Q8A5S7	50S ribosomal protein L9 OS=Bacteroides thetaiotaomicron (strain ATCC 29148 / DSM 2079 / NCTC 10582 / E50 / VPI-5482) OX=226186 GN=rplI PE=3 SV=1	2.20755e+08	3.39445e+08	236621178	2.2174e+08	3.40799e+08	5.32125e+08	4.09478e+08	4.89801e+08	5.06735e+08	2.66968e+08
Q8A9B1	Uncharacterized protein OS=Bacteroides thetaiotaomicron (strain ATCC 29148 / DSM 2079 / NCTC 10582 / E50 / VPI-5482) OX=226186 GN=BT_0904 PE=4 SV=1	3.32453e+07	42135043	3.2817e+07	2.78808e+07	3.64805e+07	2.32263e+07	2.19967e+07	2.80953e+07	3.12954e+07	1.91646e+07
Q8A8R1	Fructose-bisphosphate aldolase class I OS=Bacteroides thetaiotaomicron (strain ATCC 29148 / DSM 2079 / NCTC 10582 / E50 / VPI-5482) OX=226186 GN=BT_1106 PE=4 SV=1	3.87349e+07	3.74233e+07	3.99426e+07	2.98634e+07	3.28735e+07	3.40444e+07	3.05666e+07	2.76952e+07	3.53938e+07	3.14906e+07
Q8A8L8	Type II restriction enzyme HpaII OS=Bacteroides thetaiotaomicron (strain ATCC 29148 / DSM 2079 / NCTC 10582 / E50 / VPI-5482) OX=226186 GN=BT_1149 PE=4 SV=1	4.1382e+07	4.49617e+07	3.83209e+07	3.91148e+07	4.03982e+07	5.23838e+07	4.99224e+07	4.06903e+07	5.41368e+07	45034891
Q8A800	Diaminopimelate decarboxylase OS=Bacteroides thetaiotaomicron (strain ATCC 29148 / DSM 2079 / NCTC 10582 / E50 / VPI-5482) OX=226186 GN=lysA PE=3 SV=1	8.45556e+07	6.81025e+07	7.46224e+07	7.04002e+07	6.43262e+07	9.11348e+07	1.02714e+08	7.59209e+07	8.93245e+07	1.04352e+08
Q8A6P7	10 kDa chaperonin OS=Bacteroides thetaiotaomicron (strain ATCC 29148 / DSM 2079 / NCTC 10582 / E50 / VPI-5482) OX=226186 GN=groS PE=3 SV=1	6.61781e+08	7.76183e+08	7.65703e+08	6.71927e+08	6.8799e+08	6.24932e+08	7.40682e+08	6.45144e+08	6.97889e+08	594458372
Q8A997	tRNA N6-adenosine threonylcarbamoyltransferase OS=Bacteroides thetaiotaomicron (strain ATCC 29148 / DSM 2079 / NCTC 10582 / E50 / VPI-5482) OX=226186 GN=tsaD PE=3 SV=1	2.68804e+07	2.12018e+07	2.26363e+07	2.31437e+07	1.95822e+07	1.97584e+07	2.2613e+07	1.6144e+07	2.01452e+07	2.32155e+07
Q8A3Z2	Alkyl hydroperoxide reductase C OS=Bacteroides thetaiotaomicron (strain ATCC 29148 / DSM 2079 / NCTC 10582 / E50 / VPI-5482) OX=226186 GN=BT_2812 PE=3 SV=1	5.05495e+07	6.94805e+07	4.76329e+07	4.33205e+07	4.19733e+07	38818467	3.40362e+07	34536164	3.63887e+07	3.21932e+07
Q8A2G7	AcrB/AcrD family multidrug resistance protein OS=Bacteroides thetaiotaomicron (strain ATCC 29148 / DSM 2079 / NCTC 10582 / E50 / VPI-5482) OX=226186 GN=BT_3338 PE=3 SV=1	4.83271e+07	4.40826e+07	4.066e+07	4.0443e+07	4.64028e+07	2.18238e+07	1.55338e+07	2.35614e+07	2.73432e+07	1.78995e+07
Q89ZR8	Pantothenate synthetase OS=Bacteroides thetaiotaomicron (strain ATCC 29148 / DSM 2079 / NCTC 10582 / E50 / VPI-5482) OX=226186 GN=panC PE=3 SV=1	2.95116e+07	2.99998e+07	2.92655e+07	2.24337e+07	2.6788e+07	4.19377e+07	3.46541e+07	3.55237e+07	4.67788e+07	3.8861e+07
Q8A448	Aspartate ammonia-lyase OS=Bacteroides thetaiotaomicron (strain ATCC 29148 / DSM 2079 / NCTC 10582 / E50 / VPI-5482) OX=226186 GN=BT_2755 PE=4 SV=1	1.86958e+07	2.22673e+07	2.0374e+07	1.59017e+07	1.74375e+07	27707570	3.00987e+07	2.29125e+07	3.15627e+07	2.19181e+07
Q8A9C0	4-hydroxy-tetrahydrodipicolinate synthase OS=Bacteroides thetaiotaomicron (strain ATCC 29148 / DSM 2079 / NCTC 10582 / E50 / VPI-5482) OX=226186 GN=dapA PE=3 SV=1	3.03503e+07	2.85691e+07	2.63897e+07	2.23452e+07	2.0007e+07	2.7881e+07	2.54715e+07	1.56582e+07	2.86165e+07	2.94183e+07
Q8A6F0	Cyclin-like protein OS=Bacteroides thetaiotaomicron (strain ATCC 29148 / DSM 2079 / NCTC 10582 / E50 / VPI-5482) OX=226186 GN=BT_1934 PE=4 SV=1	1.65407e+07	1.94587e+07	1.58506e+07	1.73953e+07	1.12398e+07	1.31068e+07	1.36726e+07	1.05992e+07	1.49292e+07	1.1356e+07
Q8A651	Putative ABC transporter ATP-binding protein OS=Bacteroides thetaiotaomicron (strain ATCC 29148 / DSM 2079 / NCTC 10582 / E50 / VPI-5482) OX=226186 GN=BT_2035 PE=4 SV=1	3.61477e+07	3.80397e+07	3.20581e+07	3.28009e+07	3.29147e+07	4.38869e+07	4.4309e+07	3.91449e+07	4.48135e+07	3.2448e+07
Q8A0C2	1-deoxy-D-xylulose-5-phosphate synthase OS=Bacteroides thetaiotaomicron (strain ATCC 29148 / DSM 2079 / NCTC 10582 / E50 / VPI-5482) OX=226186 GN=dxs PE=3 SV=1	1.43506e+07	1.21354e+07	1.20302e+07	1.11647e+07	1.17848e+07	1.46125e+07	1.31321e+07	1.08144e+07	1.41905e+07	1.45571e+07
Q8AAY3	Ketoisovalerate oxidoreductase subunit vorA OS=Bacteroides thetaiotaomicron (strain ATCC 29148 / DSM 2079 / NCTC 10582 / E50 / VPI-5482) OX=226186 GN=BT_0329 PE=4 SV=1	7.22431e+07	5.61034e+07	6.5624e+07	5.83214e+07	4.33209e+07	6.98887e+07	9.10335e+07	5.73533e+07	7.42016e+07	9.38263e+07
Q8A740	Lactoylglutathione lyase and related protein OS=Bacteroides thetaiotaomicron (strain ATCC 29148 / DSM 2079 / NCTC 10582 / E50 / VPI-5482) OX=226186 GN=BT_1685 PE=3 SV=1	222458855	2.00089e+08	2.16033e+08	1.82596e+08	1.77246e+08	2.01875e+08	2.1976e+08	1.85567e+08	2.11062e+08	2.75027e+08
Q8A783	AAA-ATPase_like domain-containing protein OS=Bacteroides thetaiotaomicron (strain ATCC 29148 / DSM 2079 / NCTC 10582 / E50 / VPI-5482) OX=226186 GN=BT_1642 PE=4 SV=1	2.42646e+07	2.32401e+07	2.19357e+07	2.06766e+07	2.14791e+07	2.49268e+07	1.96603e+07	2.02377e+07	2.42786e+07	2.29872e+07
Q8A6B8	Multidrug resistance protein, AcrB/AcrD family OS=Bacteroides thetaiotaomicron (strain ATCC 29148 / DSM 2079 / NCTC 10582 / E50 / VPI-5482) OX=226186 GN=BT_1966 PE=3 SV=1	7.21379e+07	5.87291e+07	5.81873e+07	5.13037e+07	5.30732e+07	2.06409e+06	1.40728e+06	642782	2.63822e+06	1.49046e+06
Q8A543	Threonine synthase OS=Bacteroides thetaiotaomicron (strain ATCC 29148 / DSM 2079 / NCTC 10582 / E50 / VPI-5482) OX=226186 GN=BT_2401 PE=3 SV=1	35025453	3.54473e+07	3.42015e+07	3.2858e+07	3.23908e+07	4.1728e+07	3.67461e+07	3.44288e+07	4.11852e+07	4.38572e+07
Q89ZK3	4-hydroxythreonine-4-phosphate dehydrogenase OS=Bacteroides thetaiotaomicron (strain ATCC 29148 / DSM 2079 / NCTC 10582 / E50 / VPI-5482) OX=226186 GN=pdxA PE=3 SV=1	3.66889e+07	6.19373e+07	3.64184e+07	3.28824e+07	4.29928e+07	5.07212e+07	4.59251e+07	4.23124e+07	5.82603e+07	2.97668e+07
Q8A0P6	3-dehydroquinate synthase OS=Bacteroides thetaiotaomicron (strain ATCC 29148 / DSM 2079 / NCTC 10582 / E50 / VPI-5482) OX=226186 GN=BT_3975 PE=4 SV=1	2.99818e+07	2.56568e+07	2.10504e+07	2.32169e+07	2.0438e+07	2.66677e+07	2.43939e+07	1.85426e+07	2.83591e+07	2.48277e+07
Q8A873	ATP synthase subunit E OS=Bacteroides thetaiotaomicron (strain ATCC 29148 / DSM 2079 / NCTC 10582 / E50 / VPI-5482) OX=226186 GN=BT_1301 PE=4 SV=1	1.29136e+08	1.1112e+08	122365061	9.93713e+07	1.15116e+08	1.09065e+08	8.69605e+07	7.43696e+07	1.0515e+08	8.53232e+07
Q89ZJ4	Bifunctional NAD(P)H-hydrate repair enzyme OS=Bacteroides thetaiotaomicron (strain ATCC 29148 / DSM 2079 / NCTC 10582 / E50 / VPI-5482) OX=226186 GN=nnrD PE=3 SV=1	3.00266e+07	3.04487e+07	2.89188e+07	2.64908e+07	2.75487e+07	3.02005e+07	3.05561e+07	2.76181e+07	3.21599e+07	2.84877e+07
Q8A2B0	Acetylglutamate kinase OS=Bacteroides thetaiotaomicron (strain ATCC 29148 / DSM 2079 / NCTC 10582 / E50 / VPI-5482) OX=226186 GN=argB PE=3 SV=1	1.93956e+07	2.40194e+07	2.26162e+07	1.7462e+07	1.57981e+07	2.89468e+07	2.0087e+07	1.75887e+07	3.13928e+07	2.25308e+07
Q89YY9	Putative nitrogen utilization substance protein OS=Bacteroides thetaiotaomicron (strain ATCC 29148 / DSM 2079 / NCTC 10582 / E50 / VPI-5482) OX=226186 GN=BT_4591 PE=3 SV=1	123504886	1.03641e+08	1.07542e+08	9.14508e+07	9.00158e+07	1.19397e+08	1.34095e+08	1.07895e+08	1.18623e+08	1.49399e+08
Q89YZ0	Uncharacterized protein OS=Bacteroides thetaiotaomicron (strain ATCC 29148 / DSM 2079 / NCTC 10582 / E50 / VPI-5482) OX=226186 GN=BT_4590 PE=4 SV=1	6.38758e+07	5.62422e+07	5.69408e+07	5.32893e+07	6.86872e+07	7.47723e+07	5.83344e+07	5.7074e+07	5.97247e+07	5.95126e+07
Q8A1F3	D-alanine--D-alanine ligase OS=Bacteroides thetaiotaomicron (strain ATCC 29148 / DSM 2079 / NCTC 10582 / E50 / VPI-5482) OX=226186 GN=ddl PE=3 SV=1	3.17106e+07	2.77466e+07	2.31913e+07	2.15365e+07	2.47501e+07	3.55259e+07	2.87042e+07	2.91865e+07	3.52538e+07	2.68605e+07
Q8A7U6	ABM domain-containing protein OS=Bacteroides thetaiotaomicron (strain ATCC 29148 / DSM 2079 / NCTC 10582 / E50 / VPI-5482) OX=226186 GN=BT_1428 PE=1 SV=1	4.76285e+07	6.4352e+07	5.2899e+07	4.92315e+07	5.38169e+07	4.48282e+07	3.98422e+07	3.39594e+07	5.06758e+07	4.77839e+07
Q8A841	Putative dihydropyrimidine dehydrogenase [NADP+] OS=Bacteroides thetaiotaomicron (strain ATCC 29148 / DSM 2079 / NCTC 10582 / E50 / VPI-5482) OX=226186 GN=BT_1333 PE=4 SV=1	1.29503e+08	1.57398e+08	118789039	1.3794e+08	1.20378e+08	1.64538e+08	1.80286e+08	1.4258e+08	1.62099e+08	1.39345e+08
Q8A0R3	SusC homolog OS=Bacteroides thetaiotaomicron (strain ATCC 29148 / DSM 2079 / NCTC 10582 / E50 / VPI-5482) OX=226186 GN=BT_3958 PE=3 SV=1	1.96532e+07	1.92692e+07	1.59673e+07	1.49708e+07	1.70481e+07	2.65874e+07	2.19561e+07	2.56625e+07	2.96882e+07	2.43972e+07
Q8A1F7	Elongation factor P OS=Bacteroides thetaiotaomicron (strain ATCC 29148 / DSM 2079 / NCTC 10582 / E50 / VPI-5482) OX=226186 GN=efp PE=3 SV=1	2.6746e+08	3.88018e+08	1.8708e+08	1.77794e+08	2.41828e+08	3.41022e+08	332478631	3.27003e+08	3.46676e+08	3.27041e+08
Q8A1A6	Citrulline--aspartate ligase OS=Bacteroides thetaiotaomicron (strain ATCC 29148 / DSM 2079 / NCTC 10582 / E50 / VPI-5482) OX=226186 GN=BT_3760 PE=4 SV=1	4.02827e+07	4.14331e+07	3.23285e+07	3.50638e+07	3.5555e+07	6.18864e+07	7.09074e+07	5.0708e+07	6.63068e+07	5.75689e+07
Q8AA38	Probable transcriptional regulatory protein BT_0627 OS=Bacteroides thetaiotaomicron (strain ATCC 29148 / DSM 2079 / NCTC 10582 / E50 / VPI-5482) OX=226186 GN=BT_0627 PE=3 SV=1	6.56502e+07	1.52466e+08	7.79926e+07	7.13272e+07	124197056	1.46564e+08	1.07898e+08	1.17063e+08	1.58855e+08	5.99235e+07
Q8A7Z3	Formyltetrahydrofolate deformylase OS=Bacteroides thetaiotaomicron (strain ATCC 29148 / DSM 2079 / NCTC 10582 / E50 / VPI-5482) OX=226186 GN=purU PE=3 SV=1	3.55093e+07	3.50942e+07	3.40957e+07	3.3329e+07	2.85456e+07	4.2939e+07	3.76104e+07	3.03293e+07	4.5528e+07	4.08257e+07
Q8A7E5	DUF4468 domain-containing protein OS=Bacteroides thetaiotaomicron (strain ATCC 29148 / DSM 2079 / NCTC 10582 / E50 / VPI-5482) OX=226186 GN=BT_1579 PE=4 SV=1	9.49259e+07	99171882	9.2435e+07	7.7605e+07	8.78794e+07	9.5275e+07	9.20391e+07	9.04798e+07	9.65649e+07	8.99387e+07
Q8AAP8	Possible sulfotransferase OS=Bacteroides thetaiotaomicron (strain ATCC 29148 / DSM 2079 / NCTC 10582 / E50 / VPI-5482) OX=226186 GN=BT_0416 PE=4 SV=1	2.36537e+08	1.79064e+08	1.85081e+08	1.83216e+08	1.57958e+08	1.85664e+08	1.56089e+08	1.52326e+08	1.86113e+08	2.00529e+08
Q8A8Y4	1,4-beta-mannosyl-N-acetylglucosamine phosphorylase OS=Bacteroides thetaiotaomicron (strain ATCC 29148 / DSM 2079 / NCTC 10582 / E50 / VPI-5482) OX=226186 GN=BT_1033 PE=1 SV=1	4.63544e+07	4.97623e+07	4.00119e+07	3.76057e+07	4.05738e+07	4.58977e+07	3.895e+07	3.90475e+07	4.78602e+07	4.05464e+07
Q8A791	Putative aminoglycoside phosphotransferase OS=Bacteroides thetaiotaomicron (strain ATCC 29148 / DSM 2079 / NCTC 10582 / E50 / VPI-5482) OX=226186 GN=BT_1634 PE=4 SV=1	3.55713e+07	3.63713e+07	4.0426e+07	2.91085e+07	3.0841e+07	4.84675e+07	3.08071e+07	3.82091e+07	4.34125e+07	4.68574e+07
Q8A6B1	Metallopeptidase family M24, putative Xaa-Pro dipeptidase OS=Bacteroides thetaiotaomicron (strain ATCC 29148 / DSM 2079 / NCTC 10582 / E50 / VPI-5482) OX=226186 GN=BT_1974 PE=4 SV=1	4.94945e+07	5.08239e+07	4.64662e+07	4.01129e+07	4.14968e+07	5.35623e+07	5.5141e+07	4.47599e+07	5.73915e+07	5.35334e+07
Q89ZR3	50S ribosomal protein L27 OS=Bacteroides thetaiotaomicron (strain ATCC 29148 / DSM 2079 / NCTC 10582 / E50 / VPI-5482) OX=226186 GN=rpmA PE=3 SV=1	2.09036e+08	2.02561e+08	2.24682e+08	1.59958e+08	3.09895e+08	4.08567e+08	2.79308e+08	4.07735e+08	3.26927e+08	3.16292e+08
Q8A5I0	Putative lipoprotein OS=Bacteroides thetaiotaomicron (strain ATCC 29148 / DSM 2079 / NCTC 10582 / E50 / VPI-5482) OX=226186 GN=BT_2259 PE=1 SV=1	3.42264e+07	3.78789e+07	3.95885e+07	3.44355e+07	3.20618e+07	5.50148e+07	4.76056e+07	4.72137e+07	5.84646e+07	3.61798e+07
Q8A6S8	Uncharacterized protein OS=Bacteroides thetaiotaomicron (strain ATCC 29148 / DSM 2079 / NCTC 10582 / E50 / VPI-5482) OX=226186 GN=BT_1798 PE=4 SV=1	6.11101e+07	5.59225e+07	5.63015e+07	3.93967e+07	4.66209e+07	3.00133e+07	2.23398e+07	2.03382e+07	2.87516e+07	2.60713e+07
Q8A4N4	Transcription elongation factor GreA OS=Bacteroides thetaiotaomicron (strain ATCC 29148 / DSM 2079 / NCTC 10582 / E50 / VPI-5482) OX=226186 GN=greA PE=3 SV=1	7.27027e+07	8.73146e+07	6.16037e+07	5.65946e+07	9.72896e+07	1.16409e+08	1.01139e+08	1.17028e+08	1.10231e+08	6.63369e+07
Q8A1D3	Argininosuccinate lyase OS=Bacteroides thetaiotaomicron (strain ATCC 29148 / DSM 2079 / NCTC 10582 / E50 / VPI-5482) OX=226186 GN=argH PE=3 SV=1	1.59513e+07	2.17706e+07	1.49812e+07	1.44106e+07	1.52657e+07	2.11591e+07	1.23324e+07	1.71628e+07	2.34482e+07	1.18262e+07
Q8AA88	LysM-repeat protein OS=Bacteroides thetaiotaomicron (strain ATCC 29148 / DSM 2079 / NCTC 10582 / E50 / VPI-5482) OX=226186 GN=BT_0577 PE=4 SV=1	24480530	2.27512e+07	2.22888e+07	2.2589e+07	2.48366e+07	3.10862e+07	3.1413e+07	2.76298e+07	3.21763e+07	2.8455e+07
Q8A2Q8	Uncharacterized protein OS=Bacteroides thetaiotaomicron (strain ATCC 29148 / DSM 2079 / NCTC 10582 / E50 / VPI-5482) OX=226186 GN=BT_3247 PE=4 SV=1	2.82614e+07	2.75724e+07	2.55474e+07	2.52745e+07	2.65653e+07	2.45409e+07	1.84066e+07	2.30942e+07	2.74492e+07	2.08251e+07
Q8A771	Polysialic acid transport protein kpsD OS=Bacteroides thetaiotaomicron (strain ATCC 29148 / DSM 2079 / NCTC 10582 / E50 / VPI-5482) OX=226186 GN=BT_1654 PE=4 SV=1	3.03373e+06	2.78357e+06	3.12462e+06	2.41182e+06	2.20003e+06	3.69305e+06	4.23058e+06	3.59012e+06	4.06203e+06	5.15795e+06
Q8A493	30S ribosomal protein S5 OS=Bacteroides thetaiotaomicron (strain ATCC 29148 / DSM 2079 / NCTC 10582 / E50 / VPI-5482) OX=226186 GN=rpsE PE=3 SV=1	1.20381e+08	1.35084e+08	1.07832e+08	9.96135e+07	1.35739e+08	2.51845e+08	1.71427e+08	2.20494e+08	2.22758e+08	1.74492e+08
Q8A5J7	Uridylate kinase OS=Bacteroides thetaiotaomicron (strain ATCC 29148 / DSM 2079 / NCTC 10582 / E50 / VPI-5482) OX=226186 GN=pyrH PE=3 SV=1	8.84246e+07	8.44641e+07	8.19433e+07	8.22836e+07	7.34076e+07	8.14942e+07	9.13365e+07	7.10447e+07	8.39584e+07	8.76708e+07
Q8A7G0	NADPH-dependent 7-cyano-7-deazaguanine reductase OS=Bacteroides thetaiotaomicron (strain ATCC 29148 / DSM 2079 / NCTC 10582 / E50 / VPI-5482) OX=226186 GN=queF PE=3 SV=1	1.1704e+08	1.06774e+08	1.06886e+08	9.47897e+07	9.42489e+07	1.26953e+08	1.2816e+08	1.03268e+08	116617926	1.36543e+08
Q8A5T4	Putative long-chain-fatty-acid--CoA ligase OS=Bacteroides thetaiotaomicron (strain ATCC 29148 / DSM 2079 / NCTC 10582 / E50 / VPI-5482) OX=226186 GN=BT_2154 PE=4 SV=1	4.15573e+07	4.11847e+07	4.21503e+07	3.64258e+07	3.1543e+07	4.38234e+07	4.68185e+07	3.30616e+07	4.61962e+07	4.41646e+07
Q8A6W5	DUF4960 domain-containing protein OS=Bacteroides thetaiotaomicron (strain ATCC 29148 / DSM 2079 / NCTC 10582 / E50 / VPI-5482) OX=226186 GN=BT_1761 PE=4 SV=1	4.30724e+07	4.36568e+07	3.78358e+07	3.98534e+07	4.00678e+07	3.60413e+07	2.82237e+07	2.69865e+07	3.45487e+07	3.05758e+07
Q8A156	Putative endothelin-converting enzyme OS=Bacteroides thetaiotaomicron (strain ATCC 29148 / DSM 2079 / NCTC 10582 / E50 / VPI-5482) OX=226186 GN=BT_3811 PE=4 SV=1	2.59518e+07	3.51587e+07	2.18059e+07	1.93487e+07	3.48982e+07	3.40583e+07	2.40561e+07	3.05897e+07	3.80518e+07	1.89621e+07
Q8A413	Uracil phosphoribosyltransferase OS=Bacteroides thetaiotaomicron (strain ATCC 29148 / DSM 2079 / NCTC 10582 / E50 / VPI-5482) OX=226186 GN=BT_2791 PE=4 SV=1	3.38279e+07	3.34368e+07	2.67627e+07	2.46731e+07	2.58858e+07	4.22399e+07	3.50903e+07	2.49601e+07	4.23808e+07	4.51712e+07
Q8A497	Methionine aminopeptidase OS=Bacteroides thetaiotaomicron (strain ATCC 29148 / DSM 2079 / NCTC 10582 / E50 / VPI-5482) OX=226186 GN=map PE=3 SV=1	3.61015e+07	3.78306e+07	2.77286e+07	3.07724e+07	2.86579e+07	4.3663e+07	3.12216e+07	3.82968e+07	4.23244e+07	2.87257e+07
Q8A9I4	ATP-dependent RNA helicase OS=Bacteroides thetaiotaomicron (strain ATCC 29148 / DSM 2079 / NCTC 10582 / E50 / VPI-5482) OX=226186 GN=BT_0831 PE=3 SV=1	3.0813e+07	3.05616e+07	3.48611e+07	2.38595e+07	2.48217e+07	3.49731e+07	2.86911e+07	2.68583e+07	3.44891e+07	3.47611e+07
Q8A631	Putative biopolymer transport protein OS=Bacteroides thetaiotaomicron (strain ATCC 29148 / DSM 2079 / NCTC 10582 / E50 / VPI-5482) OX=226186 GN=BT_2055 PE=3 SV=1	1.60897e+08	1.76759e+08	1.20104e+08	1.32392e+08	1.46618e+08	1.02044e+08	8.86073e+07	1.27791e+08	1.42531e+08	6.17556e+07
Q8A6C8	Putative cell surface protein OS=Bacteroides thetaiotaomicron (strain ATCC 29148 / DSM 2079 / NCTC 10582 / E50 / VPI-5482) OX=226186 GN=BT_1956 PE=4 SV=1	1.3188e+07	1.5385e+07	1.34125e+07	1.09735e+07	1.32929e+07	2.05903e+07	1.71919e+07	1.75732e+07	2.12528e+07	1.84451e+07
Q8A3K9	UDP-N-acetyl-D-mannosamine dehydrogenase OS=Bacteroides thetaiotaomicron (strain ATCC 29148 / DSM 2079 / NCTC 10582 / E50 / VPI-5482) OX=226186 GN=BT_2945 PE=3 SV=1	4.8608e+07	3.87712e+07	4.46969e+07	3.90594e+07	3.59564e+07	3.48735e+07	3.56672e+07	2.65914e+07	3.80447e+07	4.07008e+07
Q8A7Z7	Histidine biosynthesis bifunctional protein HisIE OS=Bacteroides thetaiotaomicron (strain ATCC 29148 / DSM 2079 / NCTC 10582 / E50 / VPI-5482) OX=226186 GN=hisI PE=3 SV=1	3.96668e+07	3.82419e+07	3.53591e+07	2.99972e+07	2.99342e+07	4.14943e+07	3.79623e+07	3.32515e+07	4.10978e+07	4.15532e+07
Q8A1A7	N-acetyl-gamma-glutamyl-phosphate reductase OS=Bacteroides thetaiotaomicron (strain ATCC 29148 / DSM 2079 / NCTC 10582 / E50 / VPI-5482) OX=226186 GN=argC PE=3 SV=1	1.93944e+07	1.87832e+07	1.85296e+07	1.52907e+07	1.61933e+07	3.24758e+07	2.49961e+07	2.3033e+07	3.10992e+07	3.16397e+07
Q8A1V6	Peptide chain release factor RF-2 OS=Bacteroides thetaiotaomicron (strain ATCC 29148 / DSM 2079 / NCTC 10582 / E50 / VPI-5482) OX=226186 GN=BT_3552 PE=3 SV=1	6.30191e+07	5.51354e+07	5.18639e+07	4.82108e+07	4.36328e+07	6.13948e+07	6.95721e+07	5.29953e+07	6.27756e+07	8.5013e+07
Q8A8R0	Ferritin OS=Bacteroides thetaiotaomicron (strain ATCC 29148 / DSM 2079 / NCTC 10582 / E50 / VPI-5482) OX=226186 GN=BT_1107 PE=3 SV=1	3.69293e+07	4.06628e+07	3.90036e+07	2.92914e+07	3.50178e+07	3.46096e+07	2.26378e+07	2.87552e+07	4.23509e+07	2.06754e+07
Q8A475	30S ribosomal protein S10 OS=Bacteroides thetaiotaomicron (strain ATCC 29148 / DSM 2079 / NCTC 10582 / E50 / VPI-5482) OX=226186 GN=rpsJ PE=3 SV=1	3.5761e+08	3.74572e+08	3.02815e+08	3.02842e+08	4.29265e+08	6.09829e+08	4.10261e+08	5.57478e+08	5.12564e+08	4.54676e+08
Q8A2D1	Putative carbamoyl-phosphate-synthetase OS=Bacteroides thetaiotaomicron (strain ATCC 29148 / DSM 2079 / NCTC 10582 / E50 / VPI-5482) OX=226186 GN=BT_3374 PE=4 SV=1	1.90492e+07	1.64619e+07	1.77153e+07	1.37895e+07	1.37526e+07	1.55159e+07	1.70557e+07	1.27013e+07	1.86759e+07	1.99235e+07
Q89ZW7	Putative TPR domain protein OS=Bacteroides thetaiotaomicron (strain ATCC 29148 / DSM 2079 / NCTC 10582 / E50 / VPI-5482) OX=226186 GN=BT_4254 PE=4 SV=1	6.87104e+07	8.50693e+07	7.90378e+07	6.60367e+07	7.57693e+07	6.49419e+07	5.71262e+07	6.5586e+07	7.81172e+07	3.73963e+07
Q8A490	30S ribosomal protein S8 OS=Bacteroides thetaiotaomicron (strain ATCC 29148 / DSM 2079 / NCTC 10582 / E50 / VPI-5482) OX=226186 GN=rpsH PE=3 SV=1	2.28146e+08	2.68241e+08	2.44493e+08	266598787	251749253	3.08994e+08	3.58981e+08	254001461	284515812	1.49577e+08
Q8A839	Folylpolyglutamate synthase OS=Bacteroides thetaiotaomicron (strain ATCC 29148 / DSM 2079 / NCTC 10582 / E50 / VPI-5482) OX=226186 GN=BT_1335 PE=4 SV=1	2.283e+07	1.94777e+07	2.40181e+07	1.88094e+07	1.7404e+07	1.68818e+07	1.66075e+07	1.28958e+07	1.71435e+07	1.60203e+07
Q8AA40	Replicative DNA helicase OS=Bacteroides thetaiotaomicron (strain ATCC 29148 / DSM 2079 / NCTC 10582 / E50 / VPI-5482) OX=226186 GN=BT_0625 PE=3 SV=1	1.17713e+07	1.43864e+07	1.13277e+07	9.38965e+06	9.80054e+06	1.38043e+07	1.41394e+07	1.00391e+07	1.67117e+07	1.2648e+07
Q8AAW1	L-arabinose isomerase OS=Bacteroides thetaiotaomicron (strain ATCC 29148 / DSM 2079 / NCTC 10582 / E50 / VPI-5482) OX=226186 GN=araA PE=3 SV=1	2.19945e+07	2.23914e+07	2.00852e+07	1.62404e+07	1.69468e+07	1.70758e+07	1.67955e+07	1.56753e+07	1.80112e+07	1.91964e+07
Q8A011	Peptide chain release factor 1 OS=Bacteroides thetaiotaomicron (strain ATCC 29148 / DSM 2079 / NCTC 10582 / E50 / VPI-5482) OX=226186 GN=prfA PE=3 SV=1	2.04861e+07	2.25656e+07	2.03343e+07	1.31226e+07	2.15135e+07	3.24946e+07	2.35304e+07	2.66832e+07	3.41975e+07	2.31838e+07
Q8A7N3	Uncharacterized protein OS=Bacteroides thetaiotaomicron (strain ATCC 29148 / DSM 2079 / NCTC 10582 / E50 / VPI-5482) OX=226186 GN=BT_1491 PE=4 SV=1	8.6434e+07	1.10259e+08	6.50861e+07	7.40412e+07	8.21784e+07	9.86742e+07	6.28707e+07	8.22953e+07	107326901	7.83679e+07
Q8A3C1	DNA topoisomerase (ATP-hydrolyzing) OS=Bacteroides thetaiotaomicron (strain ATCC 29148 / DSM 2079 / NCTC 10582 / E50 / VPI-5482) OX=226186 GN=BT_3033 PE=4 SV=1	2.07047e+07	2.74179e+07	1.95891e+07	1.58987e+07	2.43852e+07	3.77697e+07	4.12836e+07	3.75463e+07	3.80008e+07	2.93727e+07
Q8A5V2	Putative HD superfamily hydrolase OS=Bacteroides thetaiotaomicron (strain ATCC 29148 / DSM 2079 / NCTC 10582 / E50 / VPI-5482) OX=226186 GN=BT_2134 PE=4 SV=1	3.14893e+07	3.40359e+07	2.85498e+07	2.95161e+07	2.71674e+07	2.7414e+07	2.17111e+07	1.72198e+07	2.73393e+07	2.45483e+07
Q8A0Z6	50S ribosomal protein L13 OS=Bacteroides thetaiotaomicron (strain ATCC 29148 / DSM 2079 / NCTC 10582 / E50 / VPI-5482) OX=226186 GN=rplM PE=3 SV=1	4.45816e+08	3.61847e+08	3.70979e+08	3.64405e+08	4.23053e+08	4.99282e+08	4.7552e+08	4.52539e+08	448525806	493190572
Q8A182	Putative alpha-1,2-mannosidase OS=Bacteroides thetaiotaomicron (strain ATCC 29148 / DSM 2079 / NCTC 10582 / E50 / VPI-5482) OX=226186 GN=BT_3784 PE=4 SV=1	4.60041e+06	4.98439e+06	3.87513e+06	2.92403e+06	4.2541e+06	1.67883e+07	1.35759e+07	1.08726e+07	1.81632e+07	1.35706e+07
Q8AA95	UvrABC system protein B OS=Bacteroides thetaiotaomicron (strain ATCC 29148 / DSM 2079 / NCTC 10582 / E50 / VPI-5482) OX=226186 GN=uvrB PE=3 SV=1	2.02301e+07	2.3497e+07	2.44147e+07	1.9904e+07	2.67618e+07	2.90367e+07	3.43198e+07	2.65941e+07	2.43574e+07	2.23397e+07
Q8A811	DNA Pol III Epsilon Chain OS=Bacteroides thetaiotaomicron (strain ATCC 29148 / DSM 2079 / NCTC 10582 / E50 / VPI-5482) OX=226186 GN=BT_1363 PE=4 SV=1	1.57463e+07	1.56033e+07	1.44476e+07	1.13314e+07	1.72859e+07	3.24852e+07	2.17615e+07	2.58011e+07	3.31795e+07	2.03917e+07
Q8A810	Beta sliding clamp OS=Bacteroides thetaiotaomicron (strain ATCC 29148 / DSM 2079 / NCTC 10582 / E50 / VPI-5482) OX=226186 GN=BT_1364 PE=3 SV=1	153624869	1.19619e+08	1.17319e+08	1.28642e+08	1.03477e+08	1.28422e+08	1.25423e+08	1.17828e+08	1.24817e+08	1.53072e+08
Q89ZY1	APH domain-containing protein OS=Bacteroides thetaiotaomicron (strain ATCC 29148 / DSM 2079 / NCTC 10582 / E50 / VPI-5482) OX=226186 GN=BT_4240 PE=4 SV=1	2.32924e+07	2.18839e+07	2.2204e+07	1.71768e+07	1.63856e+07	2.08073e+07	2.07072e+07	1.54759e+07	2.42539e+07	1.62349e+07
Q8A7B5	DNA polymerase III subunit gamma/tau OS=Bacteroides thetaiotaomicron (strain ATCC 29148 / DSM 2079 / NCTC 10582 / E50 / VPI-5482) OX=226186 GN=dnaX PE=3 SV=1	1.93563e+07	1.62362e+07	1.79661e+07	1.42507e+07	1.26584e+07	1.86405e+07	1.96848e+07	1.49596e+07	2.06774e+07	1.66751e+07
Q8A0X7	tRNA (guanine-N(7)-)-methyltransferase OS=Bacteroides thetaiotaomicron (strain ATCC 29148 / DSM 2079 / NCTC 10582 / E50 / VPI-5482) OX=226186 GN=trmB PE=3 SV=2	3.48047e+07	3.58206e+07	2.68588e+07	3.30219e+07	3.04348e+07	3.68293e+07	3.43123e+07	3.17168e+07	3.64229e+07	3.40231e+07
Q8A750	Conserved protein, with a conserved TPR domain OS=Bacteroides thetaiotaomicron (strain ATCC 29148 / DSM 2079 / NCTC 10582 / E50 / VPI-5482) OX=226186 GN=BT_1675 PE=4 SV=1	1.52822e+07	1.67596e+07	1.40833e+07	1.48455e+07	1.24521e+07	1.4166e+07	1.68342e+07	1.08371e+07	1.37398e+07	1.2733e+07
Q8A5T2	Putative sugar phosphate isomerase/epimerase OS=Bacteroides thetaiotaomicron (strain ATCC 29148 / DSM 2079 / NCTC 10582 / E50 / VPI-5482) OX=226186 GN=BT_2156 PE=4 SV=1	1.42332e+07	1.07375e+07	1.2917e+07	9.77789e+06	7.78062e+06	1.47542e+07	1.44896e+07	12022530	16179007	2.20126e+07
Q89ZS1	Putative alpha-amylase OS=Bacteroides thetaiotaomicron (strain ATCC 29148 / DSM 2079 / NCTC 10582 / E50 / VPI-5482) OX=226186 GN=BT_4305 PE=4 SV=1	3.47191e+07	4.38923e+07	3.14098e+07	3.00778e+07	2.71585e+07	3.15351e+07	2.15851e+07	2.20441e+07	3.55677e+07	1.92292e+07
Q8A0T2	Single-stranded-DNA-specific exonuclease RecJ OS=Bacteroides thetaiotaomicron (strain ATCC 29148 / DSM 2079 / NCTC 10582 / E50 / VPI-5482) OX=226186 GN=BT_3939 PE=3 SV=1	2.13666e+07	1.76244e+07	1.49088e+07	1.64037e+07	1.60306e+07	1.99363e+07	1.87598e+07	1.54026e+07	1.90515e+07	1.6098e+07
Q8A4N5	Uncharacterized protein OS=Bacteroides thetaiotaomicron (strain ATCC 29148 / DSM 2079 / NCTC 10582 / E50 / VPI-5482) OX=226186 GN=BT_2564 PE=4 SV=1	4.2162e+07	3.39675e+07	3.40206e+07	3.53386e+07	3.30358e+07	2.43987e+07	2.16234e+07	2.22237e+07	2.9819e+07	2.53526e+07
Q8AAD0	Iron-containing alcohol dehydrogenase OS=Bacteroides thetaiotaomicron (strain ATCC 29148 / DSM 2079 / NCTC 10582 / E50 / VPI-5482) OX=226186 GN=BT_0535 PE=4 SV=1	3.80406e+07	2.82837e+07	2.93524e+07	3.01684e+07	2.89147e+07	3.48349e+07	31006017	2.61918e+07	3.23419e+07	3.12067e+07
Q8A236	Putative dehydrogenase OS=Bacteroides thetaiotaomicron (strain ATCC 29148 / DSM 2079 / NCTC 10582 / E50 / VPI-5482) OX=226186 GN=BT_3470 PE=4 SV=1	3.23579e+07	4.54991e+07	2.84833e+07	2.70807e+07	2.97534e+07	2.28714e+07	2.24146e+07	2.02844e+07	2.34977e+07	2.09006e+07
Q8A479	50S ribosomal protein L2 OS=Bacteroides thetaiotaomicron (strain ATCC 29148 / DSM 2079 / NCTC 10582 / E50 / VPI-5482) OX=226186 GN=rplB PE=3 SV=1	4.74076e+08	3.88362e+08	4.12536e+08	4.27773e+08	5.10755e+08	4.72407e+08	3.3156e+08	5.10571e+08	5.13098e+08	2.66412e+08
Q8A464	Transcription termination/antitermination protein NusG OS=Bacteroides thetaiotaomicron (strain ATCC 29148 / DSM 2079 / NCTC 10582 / E50 / VPI-5482) OX=226186 GN=nusG PE=3 SV=1	8.39999e+07	7.31732e+07	8.06993e+07	6.1304e+07	6.1875e+07	9.32533e+07	8.39375e+07	56544612	1.01261e+08	1.23619e+08
Q8A2S9	Uroporphyrinogen-III synthase HemD, putative OS=Bacteroides thetaiotaomicron (strain ATCC 29148 / DSM 2079 / NCTC 10582 / E50 / VPI-5482) OX=226186 GN=BT_3226 PE=4 SV=1	1.02623e+08	8.79415e+07	9.34689e+07	8.94108e+07	7.92237e+07	7.79172e+07	9.02199e+07	7.21852e+07	8.41067e+07	8.86653e+07
Q8ABI8	3-oxoacyl-[acyl-carrier-protein] synthase 3 protein 1 OS=Bacteroides thetaiotaomicron (strain ATCC 29148 / DSM 2079 / NCTC 10582 / E50 / VPI-5482) OX=226186 GN=fabH1 PE=3 SV=1	2.66903e+07	2.95859e+07	2.40664e+07	2.46553e+07	2.65484e+07	1.82348e+07	1.55028e+07	1.64993e+07	1.82525e+07	1.46913e+07
Q8A6M0	3-isopropylmalate dehydrogenase OS=Bacteroides thetaiotaomicron (strain ATCC 29148 / DSM 2079 / NCTC 10582 / E50 / VPI-5482) OX=226186 GN=leuB PE=3 SV=1	4.31187e+07	4.7299e+07	4.34557e+07	3.77979e+07	3.69622e+07	4.324e+07	4.28126e+07	3.49264e+07	4.3439e+07	3.97836e+07
Q8A8L6	Uncharacterized protein OS=Bacteroides thetaiotaomicron (strain ATCC 29148 / DSM 2079 / NCTC 10582 / E50 / VPI-5482) OX=226186 GN=BT_1151 PE=4 SV=1	3.65756e+07	4.04529e+07	3.19942e+07	3.22743e+07	3.11056e+07	2.88994e+07	3.00084e+07	2.0317e+07	3.08677e+07	22472360
Q8AA63	UDP-N-acetyl-D-mannosaminuronic acid dehydrogenase OS=Bacteroides thetaiotaomicron (strain ATCC 29148 / DSM 2079 / NCTC 10582 / E50 / VPI-5482) OX=226186 GN=BT_0602 PE=3 SV=1	5.11864e+07	4.10988e+07	4.31196e+07	3.99722e+07	3.5134e+07	4.70552e+07	5.08795e+07	3.83426e+07	4.9038e+07	5.06185e+07
Q8A480	30S ribosomal protein S19 OS=Bacteroides thetaiotaomicron (strain ATCC 29148 / DSM 2079 / NCTC 10582 / E50 / VPI-5482) OX=226186 GN=rpsS PE=3 SV=1	2.52542e+08	4.30925e+08	2.18139e+08	3.1797e+08	483623474	5.24224e+08	3.85661e+08	5.26163e+08	5.19195e+08	2.09238e+08
Q8A0Q7	Putative secretory protein OS=Bacteroides thetaiotaomicron (strain ATCC 29148 / DSM 2079 / NCTC 10582 / E50 / VPI-5482) OX=226186 GN=BT_3964 PE=4 SV=1	1.59346e+07	1.81159e+07	1.36229e+07	1.40977e+07	1.84103e+07	3.25197e+07	2.22961e+07	3.1764e+07	3.71651e+07	2.63277e+07
Q8A882	Thiol:disulfide interchange protein OS=Bacteroides thetaiotaomicron (strain ATCC 29148 / DSM 2079 / NCTC 10582 / E50 / VPI-5482) OX=226186 GN=BT_1292 PE=4 SV=1	4.70909e+07	5.23639e+07	5.11108e+07	4.07553e+07	5.01729e+07	3.43799e+07	2.67541e+07	3.35966e+07	3.56402e+07	2.42835e+07
Q89ZI9	GTPase Obg OS=Bacteroides thetaiotaomicron (strain ATCC 29148 / DSM 2079 / NCTC 10582 / E50 / VPI-5482) OX=226186 GN=obg PE=3 SV=1	2.56724e+07	2.72234e+07	2.50499e+07	2.12474e+07	2.31448e+07	2.83225e+07	2.9406e+07	2.24092e+07	3.38408e+07	3.1485e+07
Q8A5T5	Putative Fe-S oxidoreductase OS=Bacteroides thetaiotaomicron (strain ATCC 29148 / DSM 2079 / NCTC 10582 / E50 / VPI-5482) OX=226186 GN=BT_2153 PE=4 SV=1	3.6031e+07	3.6329e+07	3.62863e+07	2.99683e+07	2.9857e+07	3.89624e+07	4.26219e+07	3.83521e+07	4.37061e+07	4.56431e+07
Q8A6W1	Levanase (2,6-beta-D-fructofuranosidase) OS=Bacteroides thetaiotaomicron (strain ATCC 29148 / DSM 2079 / NCTC 10582 / E50 / VPI-5482) OX=226186 GN=BT_1765 PE=3 SV=1	1.5127e+07	1.37567e+07	14928054	1.29723e+07	1.36357e+07	1.77084e+07	1.52639e+07	1.51728e+07	2.01519e+07	1.59294e+07
Q8A9J2	Uronate isomerase OS=Bacteroides thetaiotaomicron (strain ATCC 29148 / DSM 2079 / NCTC 10582 / E50 / VPI-5482) OX=226186 GN=uxaC PE=3 SV=2	1.69664e+07	1.53958e+07	1.49933e+07	9.64584e+06	1.29579e+07	2.08542e+07	1.92681e+07	1.99884e+07	2.39134e+07	2.11004e+07
Q8A338	2-dehydropantoate 2-reductase OS=Bacteroides thetaiotaomicron (strain ATCC 29148 / DSM 2079 / NCTC 10582 / E50 / VPI-5482) OX=226186 GN=BT_3117 PE=3 SV=1	2.61164e+07	2.49512e+07	2.49264e+07	1.77721e+07	2.27895e+07	3.28973e+07	2.95173e+07	2.49645e+07	3.26837e+07	3.12593e+07
Q8A531	Homoserine O-acetyltransferase OS=Bacteroides thetaiotaomicron (strain ATCC 29148 / DSM 2079 / NCTC 10582 / E50 / VPI-5482) OX=226186 GN=metAA PE=3 SV=1	3.0627e+07	2.71961e+07	2.74563e+07	2.33809e+07	2.44035e+07	3.02571e+07	2.23571e+07	2.21779e+07	3.08346e+07	2.95331e+07
Q8A7W6	Tricorn protease homolog OS=Bacteroides thetaiotaomicron (strain ATCC 29148 / DSM 2079 / NCTC 10582 / E50 / VPI-5482) OX=226186 GN=BT_1408 PE=3 SV=1	1.01958e+07	1.88377e+07	1.45415e+07	1.61697e+07	1.81714e+07	2.42063e+07	2.49786e+07	2.28302e+07	2.55896e+07	1.14465e+07
Q8A165	Peptidyl-prolyl cis-trans isomerase OS=Bacteroides thetaiotaomicron (strain ATCC 29148 / DSM 2079 / NCTC 10582 / E50 / VPI-5482) OX=226186 GN=BT_3802 PE=3 SV=1	2.15191e+08	160062274	1.87212e+08	1.5368e+08	1.35375e+08	1.76333e+08	2.18719e+08	1.65871e+08	1.82639e+08	2.38792e+08
Q8A2H0	Carb-bd_dom_fam9 domain-containing protein OS=Bacteroides thetaiotaomicron (strain ATCC 29148 / DSM 2079 / NCTC 10582 / E50 / VPI-5482) OX=226186 GN=BT_3335 PE=4 SV=1	4.69775e+07	6.18017e+07	5.23888e+07	3.70595e+07	4.96376e+07	7.14013e+07	6.57173e+07	6.86773e+07	7.91938e+07	6.88211e+07
Q8A5V7	Aspartate--ammonia ligase OS=Bacteroides thetaiotaomicron (strain ATCC 29148 / DSM 2079 / NCTC 10582 / E50 / VPI-5482) OX=226186 GN=asnA PE=3 SV=1	3.1329e+07	2.85903e+07	2.33402e+07	2.46653e+07	2.54636e+07	3.24372e+07	3.99651e+07	3.78321e+07	2.93863e+07	3.97835e+07
Q8A5L0	Thioredoxin OS=Bacteroides thetaiotaomicron (strain ATCC 29148 / DSM 2079 / NCTC 10582 / E50 / VPI-5482) OX=226186 GN=BT_2229 PE=3 SV=1	1.37901e+08	157589573	146829913	1.15514e+08	1.35976e+08	1.90778e+08	1.78561e+08	1.55613e+08	2.12393e+08	1.98996e+08
Q8A5H6	Putative lipoprotein OS=Bacteroides thetaiotaomicron (strain ATCC 29148 / DSM 2079 / NCTC 10582 / E50 / VPI-5482) OX=226186 GN=BT_2263 PE=1 SV=1	3.83658e+07	4.43776e+07	3.19066e+07	3.40244e+07	4.05313e+07	6.46022e+07	4.79632e+07	6.55529e+07	7.03107e+07	4.48894e+07
Q8A4Q5	Putative haloacid dehalogenase-like hydrolase OS=Bacteroides thetaiotaomicron (strain ATCC 29148 / DSM 2079 / NCTC 10582 / E50 / VPI-5482) OX=226186 GN=BT_2542 PE=1 SV=1	3.8031e+07	3.35175e+07	2.77881e+07	2.86728e+07	3.20754e+07	3.72549e+07	2.5737e+07	2.63831e+07	3.30333e+07	3.07317e+07
Q8A9S3	Aspartate carbamoyltransferase OS=Bacteroides thetaiotaomicron (strain ATCC 29148 / DSM 2079 / NCTC 10582 / E50 / VPI-5482) OX=226186 GN=pyrB PE=3 SV=1	4.12422e+07	4.81035e+07	4.63564e+07	3.73678e+07	3.9803e+07	6.22562e+07	5.87085e+07	5.06986e+07	5.98695e+07	3.67053e+07
Q8A292	DUF5723 domain-containing protein OS=Bacteroides thetaiotaomicron (strain ATCC 29148 / DSM 2079 / NCTC 10582 / E50 / VPI-5482) OX=226186 GN=BT_3413 PE=4 SV=1	1.06853e+07	1.02054e+07	9.51799e+06	7.35905e+06	8.54297e+06	2.66068e+07	2.76691e+07	2.38495e+07	3.26712e+07	2.86668e+07
Q8A7P8	Aspartate aminotransferase OS=Bacteroides thetaiotaomicron (strain ATCC 29148 / DSM 2079 / NCTC 10582 / E50 / VPI-5482) OX=226186 GN=BT_1476 PE=4 SV=1	7.18061e+07	6.98982e+07	5.58288e+07	5.16709e+07	5.49829e+07	6.98078e+07	7.62155e+07	6.61038e+07	7.18945e+07	7.12061e+07
Q8A0H2	Putative ArgK protein with ATPase and kinase domains OS=Bacteroides thetaiotaomicron (strain ATCC 29148 / DSM 2079 / NCTC 10582 / E50 / VPI-5482) OX=226186 GN=BT_4049 PE=3 SV=1	1.92788e+07	1.96608e+07	1.80827e+07	1.73292e+07	1.87386e+07	2.22967e+07	2.42893e+07	1.89333e+07	2.23511e+07	1.96335e+07
Q8A766	Fructose-bisphosphate aldolase class I OS=Bacteroides thetaiotaomicron (strain ATCC 29148 / DSM 2079 / NCTC 10582 / E50 / VPI-5482) OX=226186 GN=BT_1659 PE=4 SV=1	3.2452e+07	3.1185e+07	3.5023e+07	2.98963e+07	2.66008e+07	3.1223e+07	2.96396e+07	2.59198e+07	3.27168e+07	2.63333e+07
Q8A8Y5	Alpha-1,2-mannosidase family protein OS=Bacteroides thetaiotaomicron (strain ATCC 29148 / DSM 2079 / NCTC 10582 / E50 / VPI-5482) OX=226186 GN=BT_1032 PE=4 SV=1	1.5207e+07	1.5217e+07	1.14834e+07	1.49984e+07	1.43532e+07	1.53053e+07	1.28017e+07	1.27948e+07	1.38227e+07	1.47334e+07
Q8A822	Glycoside transferase family 4 OS=Bacteroides thetaiotaomicron (strain ATCC 29148 / DSM 2079 / NCTC 10582 / E50 / VPI-5482) OX=226186 GN=BT_1352 PE=4 SV=1	1.45544e+07	1.50118e+07	1.23166e+07	1.16304e+07	1.29631e+07	1.61142e+07	1.50619e+07	1.52925e+07	1.82664e+07	1.61506e+07
Q89ZX8	Glycosyl hydrolase family 109 protein 1 OS=Bacteroides thetaiotaomicron (strain ATCC 29148 / DSM 2079 / NCTC 10582 / E50 / VPI-5482) OX=226186 GN=BT_4243 PE=3 SV=1	1.06717e+07	1.4892e+07	1.0832e+07	9.61289e+06	1.0249e+07	1.46516e+07	1.4644e+07	1.27744e+07	1.64884e+07	1.27221e+07
Q89ZC1	Putative electron transport protein OS=Bacteroides thetaiotaomicron (strain ATCC 29148 / DSM 2079 / NCTC 10582 / E50 / VPI-5482) OX=226186 GN=BT_4456 PE=4 SV=1	6.91211e+07	68746476	6.80906e+07	6.40939e+07	5.73605e+07	6.40293e+07	7.37758e+07	6.18766e+07	7.75362e+07	112221031
Q8A7G4	Quinolinate phosphoribosyltransferase [decarboxylating] OS=Bacteroides thetaiotaomicron (strain ATCC 29148 / DSM 2079 / NCTC 10582 / E50 / VPI-5482) OX=226186 GN=BT_1560 PE=3 SV=1	6.34845e+07	7.6075e+07	6.99837e+07	6.53539e+07	6.26011e+07	8.76807e+07	7.99792e+07	6.97887e+07	9.33237e+07	8.15691e+07
Q8A9C2	tRNA (guanine-N(1)-)-methyltransferase OS=Bacteroides thetaiotaomicron (strain ATCC 29148 / DSM 2079 / NCTC 10582 / E50 / VPI-5482) OX=226186 GN=trmD PE=3 SV=1	1.98066e+07	2.89049e+07	1.80365e+07	1.46761e+07	1.62934e+07	16950942	1.9138e+07	1.24154e+07	1.88148e+07	2.13174e+07
Q89Z71	Putative acetyltransferase OS=Bacteroides thetaiotaomicron (strain ATCC 29148 / DSM 2079 / NCTC 10582 / E50 / VPI-5482) OX=226186 GN=BT_4506 PE=4 SV=1	1.62546e+07	1.53861e+07	1.33532e+07	1.19165e+07	1.41177e+07	1.58223e+07	1.38337e+07	1.39196e+07	1.51227e+07	1.37963e+07
Q8A3F3	ATP-dependent DNA helicase OS=Bacteroides thetaiotaomicron (strain ATCC 29148 / DSM 2079 / NCTC 10582 / E50 / VPI-5482) OX=226186 GN=BT_3001 PE=4 SV=1	3.80201e+06	6.21851e+06	4.19106e+06	3.90139e+06	5.11938e+06	8.03121e+06	6.3403e+06	5.34393e+06	7.10522e+06	5.0488e+06
Q89ZK4	Putative lipoprotein OS=Bacteroides thetaiotaomicron (strain ATCC 29148 / DSM 2079 / NCTC 10582 / E50 / VPI-5482) OX=226186 GN=BT_4373 PE=4 SV=1	2.56028e+07	2.63531e+07	2.26155e+07	2.08861e+07	2.16991e+07	1.51443e+07	1.51237e+07	1.57356e+07	1.80739e+07	1.5423e+07
Q8A0U9	Putative ThiJ family intracellular protease/amidase OS=Bacteroides thetaiotaomicron (strain ATCC 29148 / DSM 2079 / NCTC 10582 / E50 / VPI-5482) OX=226186 GN=BT_3922 PE=4 SV=1	5.10358e+07	4.36468e+07	4.80276e+07	4.10832e+07	4.11281e+07	4.29368e+07	3.77822e+07	3.67565e+07	4.43119e+07	4.77483e+07
Q8A1Z2	Arabinan endo-1,5-alpha-L-arabinosidase A OS=Bacteroides thetaiotaomicron (strain ATCC 29148 / DSM 2079 / NCTC 10582 / E50 / VPI-5482) OX=226186 GN=BT_3516 PE=3 SV=1	1.37988e+07	1.08597e+07	1.30542e+07	1.14957e+07	8.81382e+06	8.70517e+06	1.05247e+07	7.60259e+06	9.8608e+06	1.44444e+07
Q8AAP3	Tetratricopeptide repeat (TPR) family protein OS=Bacteroides thetaiotaomicron (strain ATCC 29148 / DSM 2079 / NCTC 10582 / E50 / VPI-5482) OX=226186 GN=BT_0421 PE=4 SV=1	1.44741e+07	1.39792e+07	1.57477e+07	1.35229e+07	1.3595e+07	1.45313e+07	1.61906e+07	12951567	1.62527e+07	1.3183e+07
Q8AAN6	Phenylacetate-coenzyme A ligase OS=Bacteroides thetaiotaomicron (strain ATCC 29148 / DSM 2079 / NCTC 10582 / E50 / VPI-5482) OX=226186 GN=BT_0428 PE=1 SV=1	4.72373e+07	3.80214e+07	4.27483e+07	3.63763e+07	3.21143e+07	3.98348e+07	5.02228e+07	3.48809e+07	4.38626e+07	5.23067e+07
Q8AAY2	Ketoisovalerate oxidoreductase subunit vorA OS=Bacteroides thetaiotaomicron (strain ATCC 29148 / DSM 2079 / NCTC 10582 / E50 / VPI-5482) OX=226186 GN=BT_0330 PE=4 SV=1	3.21905e+07	4.40366e+07	3.73027e+07	2.81486e+07	3.27784e+07	5.31601e+07	3.77835e+07	5.58214e+07	5.17312e+07	3.00445e+07
Q8A9I6	UDP-glucose 6-dehydrogenase OS=Bacteroides thetaiotaomicron (strain ATCC 29148 / DSM 2079 / NCTC 10582 / E50 / VPI-5482) OX=226186 GN=BT_0829 PE=3 SV=1	2.51532e+07	3.08414e+07	2.08153e+07	2.40305e+07	2.33249e+07	2.98466e+07	2.83068e+07	2.50578e+07	3.22242e+07	2.05503e+07
Q8A158	ABC transporter ATP-binding protein OS=Bacteroides thetaiotaomicron (strain ATCC 29148 / DSM 2079 / NCTC 10582 / E50 / VPI-5482) OX=226186 GN=BT_3809 PE=4 SV=1	1.75469e+07	3.0302e+07	1.60759e+07	1.58752e+07	2.68894e+07	4.11784e+07	3.6698e+07	3.58481e+07	4.12723e+07	2.27999e+07
Q8A0S3	DHH domain-containing protein OS=Bacteroides thetaiotaomicron (strain ATCC 29148 / DSM 2079 / NCTC 10582 / E50 / VPI-5482) OX=226186 GN=BT_3948 PE=4 SV=1	2.98887e+07	3.49494e+07	2.90749e+07	2.53727e+07	2.93178e+07	4.3775e+07	3.52974e+07	3.27845e+07	43768671	3.21936e+07
Q8ABW7	Chromosome-partitioning ATPase OS=Bacteroides thetaiotaomicron (strain ATCC 29148 / DSM 2079 / NCTC 10582 / E50 / VPI-5482) OX=226186 GN=BT_p548231 PE=4 SV=1	3.66972e+07	3.41503e+07	3.30883e+07	2.99031e+07	3.40662e+07	4.13186e+07	3.41844e+07	3.46608e+07	3.97824e+07	3.61451e+07
Q8A1C6	Fib_succ_major domain-containing protein OS=Bacteroides thetaiotaomicron (strain ATCC 29148 / DSM 2079 / NCTC 10582 / E50 / VPI-5482) OX=226186 GN=BT_3740 PE=4 SV=1	1.23025e+07	1.39947e+07	1.30181e+07	1.09474e+07	1.15144e+07	1.77486e+07	1.4037e+07	1.21431e+07	1.70723e+07	1.52186e+07
Q8A037	Phosphoglycolate phosphatase OS=Bacteroides thetaiotaomicron (strain ATCC 29148 / DSM 2079 / NCTC 10582 / E50 / VPI-5482) OX=226186 GN=BT_4184 PE=4 SV=1	9.02992e+06	1.21932e+07	1.15424e+07	1.25811e+07	1.16995e+07	2.38879e+07	1.4836e+07	1.34075e+07	2.44975e+07	9.86789e+06
Q8A2G3	Uncharacterized protein OS=Bacteroides thetaiotaomicron (strain ATCC 29148 / DSM 2079 / NCTC 10582 / E50 / VPI-5482) OX=226186 GN=BT_3342 PE=4 SV=1	3.4328e+07	2.91633e+07	2.90472e+07	2.93584e+07	2.32548e+07	2.56177e+07	2.5537e+07	2.17977e+07	2.55114e+07	2.56192e+07
Q8A9C3	Dihydroorotate dehydrogenase B (NAD(+)), catalytic subunit OS=Bacteroides thetaiotaomicron (strain ATCC 29148 / DSM 2079 / NCTC 10582 / E50 / VPI-5482) OX=226186 GN=pyrD PE=3 SV=1	3.0554e+07	3.18958e+07	3.29643e+07	3.16549e+07	3.06948e+07	3.67629e+07	3.87368e+07	2.98386e+07	3.94131e+07	3.86153e+07
Q8AAP1	Translation initiation factor IF-3 OS=Bacteroides thetaiotaomicron (strain ATCC 29148 / DSM 2079 / NCTC 10582 / E50 / VPI-5482) OX=226186 GN=infC PE=3 SV=1	1.66324e+08	1.65112e+08	159941738	1.47496e+08	1.48721e+08	1.79174e+08	2.0049e+08	1.73332e+08	1.87756e+08	161708862
Q8AAB5	Putative glycerophosphodiester phosphodiesterase OS=Bacteroides thetaiotaomicron (strain ATCC 29148 / DSM 2079 / NCTC 10582 / E50 / VPI-5482) OX=226186 GN=BT_0550 PE=4 SV=1	5.39251e+07	4.68067e+07	5.27211e+07	4.65318e+07	4.49573e+07	3.4882e+07	3.74044e+07	3.05109e+07	3.72192e+07	3.81658e+07
Q8A9W8	Putative phosphatase/phosphohexomutase OS=Bacteroides thetaiotaomicron (strain ATCC 29148 / DSM 2079 / NCTC 10582 / E50 / VPI-5482) OX=226186 GN=BT_0697 PE=4 SV=1	7.27887e+07	5.30495e+07	5.54026e+07	6.03112e+07	5.43362e+07	5.16479e+07	4.86573e+07	4.27886e+07	5.27191e+07	6.28177e+07
Q02550	Anaerobic sulfatase-maturating enzyme OS=Bacteroides thetaiotaomicron (strain ATCC 29148 / DSM 2079 / NCTC 10582 / E50 / VPI-5482) OX=226186 GN=chuR PE=1 SV=2	1.07632e+07	1.2475e+07	1.01802e+07	8.58902e+06	1.11537e+07	1.32245e+07	9.41737e+06	1.08108e+07	1.37079e+07	1.15424e+07
Q8A485	30S ribosomal protein S17 1 OS=Bacteroides thetaiotaomicron (strain ATCC 29148 / DSM 2079 / NCTC 10582 / E50 / VPI-5482) OX=226186 GN=rpsQ1 PE=3 SV=1	1.47497e+08	2.93022e+08	1.1009e+08	1.14632e+08	2.87858e+08	287215231	2.96655e+08	3.09294e+08	3.03324e+08	1.23818e+08
Q8A8U0	Putative aspartate aminotransferase OS=Bacteroides thetaiotaomicron (strain ATCC 29148 / DSM 2079 / NCTC 10582 / E50 / VPI-5482) OX=226186 GN=BT_1077 PE=4 SV=1	5.46401e+07	4.29525e+07	5.29789e+07	4.5767e+07	4.40173e+07	3.91624e+07	3.83268e+07	3.24406e+07	39991749	4.59836e+07
Q8A0H3	Uncharacterized protein OS=Bacteroides thetaiotaomicron (strain ATCC 29148 / DSM 2079 / NCTC 10582 / E50 / VPI-5482) OX=226186 GN=BT_4048 PE=4 SV=1	3.82798e+07	3.16756e+07	3.52197e+07	3.08377e+07	2.75988e+07	3.33747e+07	3.51619e+07	2.54059e+07	3.28499e+07	3.52049e+07
Q8A738	Sodium pump decarboxylase, gamma subunit OS=Bacteroides thetaiotaomicron (strain ATCC 29148 / DSM 2079 / NCTC 10582 / E50 / VPI-5482) OX=226186 GN=BT_1687 PE=4 SV=1	5.0025e+07	5.20354e+07	4.22934e+07	4.15776e+07	4.98232e+07	3.82289e+07	2.58372e+07	4.01247e+07	5.00271e+07	2.93573e+07
Q8A681	UDP-N-acetylglucosamine 1-carboxyvinyltransferase OS=Bacteroides thetaiotaomicron (strain ATCC 29148 / DSM 2079 / NCTC 10582 / E50 / VPI-5482) OX=226186 GN=murA PE=3 SV=1	14304353	1.5717e+07	1.19606e+07	1.10833e+07	1.30772e+07	1.74549e+07	2.01201e+07	1.7902e+07	1.48744e+07	1.35097e+07
Q8A2I5	Dihydrodipicolinate reductase OS=Bacteroides thetaiotaomicron (strain ATCC 29148 / DSM 2079 / NCTC 10582 / E50 / VPI-5482) OX=226186 GN=BT_3320 PE=3 SV=1	3.74713e+07	3.60577e+07	3.64137e+07	2.75893e+07	2.9677e+07	3.89538e+07	4.10766e+07	3.44404e+07	4.09841e+07	5.25189e+07
Q8AAU0	AAA-ATPase_like domain-containing protein OS=Bacteroides thetaiotaomicron (strain ATCC 29148 / DSM 2079 / NCTC 10582 / E50 / VPI-5482) OX=226186 GN=BT_0374 PE=4 SV=1	1.20013e+07	1.21469e+07	9.61814e+06	8.46731e+06	7.96947e+06	1.16416e+07	1.05369e+07	9.19155e+06	1.34034e+07	1.09535e+07
Q8A1U7	DUF5689 domain-containing protein OS=Bacteroides thetaiotaomicron (strain ATCC 29148 / DSM 2079 / NCTC 10582 / E50 / VPI-5482) OX=226186 GN=BT_3561 PE=4 SV=1	9.31731e+07	7.31505e+07	7.2647e+07	6.7463e+07	6.41889e+07	4.72738e+07	4.79802e+07	4.70686e+07	6.45859e+07	5.38759e+07
Q8AA47	Ion-translocating oxidoreductase complex subunit C OS=Bacteroides thetaiotaomicron (strain ATCC 29148 / DSM 2079 / NCTC 10582 / E50 / VPI-5482) OX=226186 GN=rnfC PE=3 SV=1	2.4916e+07	1.93233e+07	2.32772e+07	2.04002e+07	1.34098e+07	1.53478e+07	2.28933e+07	1.54737e+07	1.72843e+07	2.25486e+07
Q8A680	Uncharacterized protein OS=Bacteroides thetaiotaomicron (strain ATCC 29148 / DSM 2079 / NCTC 10582 / E50 / VPI-5482) OX=226186 GN=BT_2006 PE=4 SV=1	3.82021e+07	3.48146e+07	3.40737e+07	3.24297e+07	2.99674e+07	4.29661e+07	4.46026e+07	4.0314e+07	4.27559e+07	5.30101e+07
Q8A6R7	Conserved protein, with weak BamHI domain OS=Bacteroides thetaiotaomicron (strain ATCC 29148 / DSM 2079 / NCTC 10582 / E50 / VPI-5482) OX=226186 GN=BT_1809 PE=4 SV=1	9.53686e+06	8.51837e+06	7.64636e+06	1.02239e+07	7.24064e+06	7.65526e+06	6.42865e+06	7.21146e+06	8.03829e+06	8.20629e+06
Q8A8K6	Aminopeptidase OS=Bacteroides thetaiotaomicron (strain ATCC 29148 / DSM 2079 / NCTC 10582 / E50 / VPI-5482) OX=226186 GN=BT_1161 PE=3 SV=1	2.78876e+07	3.24928e+07	2.68954e+07	2.26054e+07	2.43949e+07	3.07027e+07	2.41438e+07	2.42013e+07	2.99339e+07	2.17712e+07
Q8A7S8	ATP-dependent dethiobiotin synthetase BioD OS=Bacteroides thetaiotaomicron (strain ATCC 29148 / DSM 2079 / NCTC 10582 / E50 / VPI-5482) OX=226186 GN=bioD PE=3 SV=1	3.52704e+07	2.92849e+07	3.65013e+07	2.8286e+07	2.36785e+07	1.609e+07	1.50771e+07	1.26605e+07	1.74352e+07	1.83058e+07
Q8A2I6	Signal peptidase I OS=Bacteroides thetaiotaomicron (strain ATCC 29148 / DSM 2079 / NCTC 10582 / E50 / VPI-5482) OX=226186 GN=BT_3319 PE=3 SV=1	2.33853e+07	2.14707e+07	1.40617e+07	1.44686e+07	2.24459e+07	1.72599e+07	1.30499e+07	1.67872e+07	1.83837e+07	1.41546e+07
Q89ZY0	Lactase OS=Bacteroides thetaiotaomicron (strain ATCC 29148 / DSM 2079 / NCTC 10582 / E50 / VPI-5482) OX=226186 GN=BT_4241 PE=3 SV=1	6.59661e+06	5.33339e+06	5.11905e+06	4.34649e+06	4.73633e+06	7.23818e+06	8.52739e+06	5.79216e+06	7.27993e+06	8.19705e+06
Q8A466	50S ribosomal protein L1 OS=Bacteroides thetaiotaomicron (strain ATCC 29148 / DSM 2079 / NCTC 10582 / E50 / VPI-5482) OX=226186 GN=rplA PE=3 SV=1	4.48896e+08	4.5656e+08	3.87946e+08	3.53226e+08	5.855e+08	7.46019e+08	5.93782e+08	7.15302e+08	7.10876e+08	5.12283e+08
Q8A478	50S ribosomal protein L23 OS=Bacteroides thetaiotaomicron (strain ATCC 29148 / DSM 2079 / NCTC 10582 / E50 / VPI-5482) OX=226186 GN=rplW PE=3 SV=1	3.43333e+08	2.95207e+08	3.36545e+08	3.14162e+08	2.74704e+08	335032119	4.03069e+08	2.81837e+08	356725261	3.99136e+08
Q8A4B7	Putative cation efflux transporter OS=Bacteroides thetaiotaomicron (strain ATCC 29148 / DSM 2079 / NCTC 10582 / E50 / VPI-5482) OX=226186 GN=BT_2686 PE=4 SV=1	2.02074e+07	2.42009e+07	1.60715e+07	1.50205e+07	2.3042e+07	8.31509e+06	6.39419e+06	9.69578e+06	9.95722e+06	5.21485e+06
Q8A423	Putative mannose-1-phosphate guanylyltransferase OS=Bacteroides thetaiotaomicron (strain ATCC 29148 / DSM 2079 / NCTC 10582 / E50 / VPI-5482) OX=226186 GN=BT_2781 PE=4 SV=1	2.43544e+07	2.88582e+07	2.69198e+07	2.43953e+07	2.20685e+07	3.43133e+07	3.45544e+07	3.32594e+07	3.86945e+07	3.3509e+07
Q8A5W3	Glycerol-3-phosphate dehydrogenase OS=Bacteroides thetaiotaomicron (strain ATCC 29148 / DSM 2079 / NCTC 10582 / E50 / VPI-5482) OX=226186 GN=BT_2123 PE=3 SV=1	2.03361e+07	1.8422e+07	1.85023e+07	1.77996e+07	2.58912e+07	3.29758e+07	2.00573e+07	2.62162e+07	2.58897e+07	2.21729e+07
Q8A9A2	Ribosomal protein S12 methylthiotransferase RimO OS=Bacteroides thetaiotaomicron (strain ATCC 29148 / DSM 2079 / NCTC 10582 / E50 / VPI-5482) OX=226186 GN=rimO PE=3 SV=1	2.55114e+07	2.53047e+07	2.72077e+07	2.38345e+07	2.33586e+07	2.17057e+07	2.58056e+07	1.83462e+07	2.58482e+07	2.50891e+07
Q8A303	ATP-dependent DNA helicase OS=Bacteroides thetaiotaomicron (strain ATCC 29148 / DSM 2079 / NCTC 10582 / E50 / VPI-5482) OX=226186 GN=BT_3152 PE=4 SV=1	9.07534e+06	7.47265e+06	7.68987e+06	5.4784e+06	6.84596e+06	1.08279e+07	8.79896e+06	7.5947e+06	1.19703e+07	1.0921e+07
Q8A4B6	Cation efflux system protein OS=Bacteroides thetaiotaomicron (strain ATCC 29148 / DSM 2079 / NCTC 10582 / E50 / VPI-5482) OX=226186 GN=BT_2687 PE=3 SV=1	3.4456e+07	3.5727e+07	2.54454e+07	3.04882e+07	4.15325e+07	1.5496e+07	1.87703e+07	2.05569e+07	2.1671e+07	1.8038e+07
Q89ZQ5	3-deoxy-8-phosphooctulonate synthase OS=Bacteroides thetaiotaomicron (strain ATCC 29148 / DSM 2079 / NCTC 10582 / E50 / VPI-5482) OX=226186 GN=BT_4321 PE=3 SV=1	1.94841e+07	1.61865e+07	1.83321e+07	1.66195e+07	1.50204e+07	2.26532e+07	1.81801e+07	1.51453e+07	2.35734e+07	2.2961e+07
Q8AAQ5	Putative short-chain dehydrogenase OS=Bacteroides thetaiotaomicron (strain ATCC 29148 / DSM 2079 / NCTC 10582 / E50 / VPI-5482) OX=226186 GN=BT_0409 PE=3 SV=1	3.47898e+07	3.08748e+07	3.36806e+07	2.88636e+07	2.73195e+07	3.32226e+07	3.3828e+07	2.81745e+07	3.58519e+07	3.95165e+07
Q89ZK2	Transcriptional regulator OS=Bacteroides thetaiotaomicron (strain ATCC 29148 / DSM 2079 / NCTC 10582 / E50 / VPI-5482) OX=226186 GN=BT_4375 PE=4 SV=1	2.1552e+07	1.91742e+07	1.94526e+07	1.50267e+07	1.48116e+07	1.82077e+07	1.85623e+07	1.44455e+07	1.86122e+07	2.0684e+07
Q8A1C3	Uncharacterized protein OS=Bacteroides thetaiotaomicron (strain ATCC 29148 / DSM 2079 / NCTC 10582 / E50 / VPI-5482) OX=226186 GN=BT_3743 PE=4 SV=1	3.67594e+07	4.7515e+07	4.01737e+07	4.28793e+07	4.82904e+07	7.49698e+07	5.52597e+07	6.66001e+07	8.06294e+07	4.39193e+07
Q8A5Z7	DNA topoisomerase OS=Bacteroides thetaiotaomicron (strain ATCC 29148 / DSM 2079 / NCTC 10582 / E50 / VPI-5482) OX=226186 GN=BT_2089 PE=3 SV=1	1.01557e+07	9.10319e+06	1.13958e+07	9.26286e+06	8.95098e+06	1.32362e+07	1.15378e+07	1.08118e+07	1.30759e+07	1.28501e+07
Q8A2P9	Serine O-acetyltransferase OS=Bacteroides thetaiotaomicron (strain ATCC 29148 / DSM 2079 / NCTC 10582 / E50 / VPI-5482) OX=226186 GN=BT_3256 PE=3 SV=1	2.17321e+07	1.73289e+07	1.81068e+07	1.71661e+07	1.39375e+07	1.77915e+07	1.75641e+07	1.41181e+07	1.75322e+07	2.03731e+07
Q89YX0	Putative bacterioferritin co-migratory protein OS=Bacteroides thetaiotaomicron (strain ATCC 29148 / DSM 2079 / NCTC 10582 / E50 / VPI-5482) OX=226186 GN=BT_4611 PE=4 SV=1	44403634	4.47874e+07	3.75128e+07	4.23124e+07	4.33124e+07	4.91623e+07	4.57063e+07	45838369	5.13643e+07	4.4858e+07
Q8ABF8	Acetyl esterase (Acetylxylosidase) OS=Bacteroides thetaiotaomicron (strain ATCC 29148 / DSM 2079 / NCTC 10582 / E50 / VPI-5482) OX=226186 GN=BT_0152 PE=4 SV=1	2.17562e+07	1.83722e+07	2.25953e+07	1.72212e+07	1.73774e+07	2.1375e+07	2.58784e+07	1.83384e+07	2.26517e+07	28409383
Q8AAG1	TonB-dependent outer membrane receptor OS=Bacteroides thetaiotaomicron (strain ATCC 29148 / DSM 2079 / NCTC 10582 / E50 / VPI-5482) OX=226186 GN=BT_0504 PE=3 SV=1	1.36207e+07	1.37152e+07	1.31214e+07	1.28733e+07	1.20058e+07	8.3258e+06	6.82718e+06	8.21172e+06	8.77831e+06	5.19388e+06
Q8A0S5	Ribulose-phosphate 3-epimerase OS=Bacteroides thetaiotaomicron (strain ATCC 29148 / DSM 2079 / NCTC 10582 / E50 / VPI-5482) OX=226186 GN=rpe PE=3 SV=1	9.32285e+06	9.16635e+06	8.67204e+06	1.02817e+07	8.72537e+06	1.12635e+07	1.0194e+07	9.59113e+06	1.13247e+07	1.29867e+07
Q8A7P7	Uncharacterized protein OS=Bacteroides thetaiotaomicron (strain ATCC 29148 / DSM 2079 / NCTC 10582 / E50 / VPI-5482) OX=226186 GN=BT_1477 PE=4 SV=1	1.92921e+07	1.67948e+07	1.80955e+07	1.65473e+07	1.4885e+07	1.28878e+07	1.14168e+07	9.02046e+06	1.39162e+07	1.38199e+07
Q8A1E9	N-succinylornithine carbamoyltransferase OS=Bacteroides thetaiotaomicron (strain ATCC 29148 / DSM 2079 / NCTC 10582 / E50 / VPI-5482) OX=226186 GN=argF' PE=3 SV=1	3.74695e+07	4.08185e+07	3.025e+07	2.99973e+07	3.09586e+07	3.27758e+07	2.40661e+07	2.73035e+07	3.31057e+07	3.07157e+07
Q89Z22	UPF0365 protein BT_4555 OS=Bacteroides thetaiotaomicron (strain ATCC 29148 / DSM 2079 / NCTC 10582 / E50 / VPI-5482) OX=226186 GN=BT_4555 PE=3 SV=1	2.60387e+07	2.24191e+07	2.5133e+07	2.25535e+07	2.39029e+07	1.72806e+07	1.75167e+07	2.04732e+07	2.07288e+07	1.73088e+07
Q8A823	Glucose-1-phosphate cytidylyltransferase OS=Bacteroides thetaiotaomicron (strain ATCC 29148 / DSM 2079 / NCTC 10582 / E50 / VPI-5482) OX=226186 GN=BT_1351 PE=4 SV=1	4.54742e+07	4.04652e+07	3.87942e+07	3.51633e+07	3.56944e+07	4.80135e+07	5.33261e+07	4.06591e+07	4.69616e+07	5.91202e+07
Q8A7M4	Ribonuclease G OS=Bacteroides thetaiotaomicron (strain ATCC 29148 / DSM 2079 / NCTC 10582 / E50 / VPI-5482) OX=226186 GN=BT_1500 PE=4 SV=1	1.40746e+07	1.45538e+07	1.54263e+07	1.68893e+07	1.51361e+07	1.41412e+07	1.20248e+07	1.37929e+07	1.58435e+07	1.31073e+07
Q8A8X8	SusD homolog OS=Bacteroides thetaiotaomicron (strain ATCC 29148 / DSM 2079 / NCTC 10582 / E50 / VPI-5482) OX=226186 GN=BT_1039 PE=4 SV=1	8.78901e+06	1.29257e+07	9.11015e+06	8.1089e+06	1.01738e+07	1.02209e+07	8.84241e+06	9.9389e+06	1.1374e+07	7.23122e+06
Q8A1M4	AAA-ATPase_like domain-containing protein OS=Bacteroides thetaiotaomicron (strain ATCC 29148 / DSM 2079 / NCTC 10582 / E50 / VPI-5482) OX=226186 GN=BT_3637 PE=4 SV=1	1.31173e+07	1.17744e+07	1.02893e+07	1.0204e+07	1.12246e+07	1.41431e+07	1.24375e+07	1.06479e+07	1.38994e+07	1.29651e+07
Q8A9R8	Putative phosphatidylinositol-4-phosphate 5-kinase OS=Bacteroides thetaiotaomicron (strain ATCC 29148 / DSM 2079 / NCTC 10582 / E50 / VPI-5482) OX=226186 GN=BT_0747 PE=4 SV=1	2.45722e+07	2.42654e+07	2.83488e+07	1.90826e+07	2.22409e+07	3.08059e+07	2.98291e+07	3.13015e+07	3.46619e+07	3.57114e+07
Q8AA91	Uncharacterized protein OS=Bacteroides thetaiotaomicron (strain ATCC 29148 / DSM 2079 / NCTC 10582 / E50 / VPI-5482) OX=226186 GN=BT_0574 PE=4 SV=1	4.58975e+07	7.524e+07	37777709	3.79152e+07	4.00479e+07	5.03949e+07	4.20558e+07	4.39719e+07	4.97779e+07	4.55711e+07
Q8A129	ATP-dependent Clp protease proteolytic subunit OS=Bacteroides thetaiotaomicron (strain ATCC 29148 / DSM 2079 / NCTC 10582 / E50 / VPI-5482) OX=226186 GN=clpP PE=3 SV=1	9.34051e+07	9.30338e+07	8.49298e+07	7.66914e+07	7.60026e+07	8.31374e+07	8.70644e+07	7.87994e+07	8.75106e+07	9.21595e+07
Q8AAZ0	Putative oxidoreductase OS=Bacteroides thetaiotaomicron (strain ATCC 29148 / DSM 2079 / NCTC 10582 / E50 / VPI-5482) OX=226186 GN=BT_0322 PE=4 SV=1	1.56125e+07	1.42296e+07	1.2779e+07	1.20104e+07	1.22729e+07	1.68304e+07	1.58255e+07	1.41958e+07	1.50715e+07	1.83361e+07
Q8A679	TsaD domain-containing protein OS=Bacteroides thetaiotaomicron (strain ATCC 29148 / DSM 2079 / NCTC 10582 / E50 / VPI-5482) OX=226186 GN=BT_2007 PE=4 SV=1	1.55429e+07	1.52564e+07	1.16109e+07	1.21314e+07	1.09147e+07	1.5302e+07	1.67961e+07	1.10851e+07	1.78066e+07	1.58732e+07
Q8A499	30S ribosomal protein S13 OS=Bacteroides thetaiotaomicron (strain ATCC 29148 / DSM 2079 / NCTC 10582 / E50 / VPI-5482) OX=226186 GN=rpsM PE=3 SV=1	464644597	356770317	3.47768e+08	4.31611e+08	4.63124e+08	4.31453e+08	3.55694e+08	4.31086e+08	3.51939e+08	3.92793e+08
Q8A9M2	Xylose isomerase OS=Bacteroides thetaiotaomicron (strain ATCC 29148 / DSM 2079 / NCTC 10582 / E50 / VPI-5482) OX=226186 GN=xylA PE=1 SV=1	1.76824e+07	1.5328e+07	1.55996e+07	1.19993e+07	1.25425e+07	8.08885e+06	7.33554e+06	6.61754e+06	7.80222e+06	8.98737e+06
Q8A8M1	Putative metallo-beta-lactamase OS=Bacteroides thetaiotaomicron (strain ATCC 29148 / DSM 2079 / NCTC 10582 / E50 / VPI-5482) OX=226186 GN=BT_1146 PE=4 SV=1	2.18974e+07	2.36418e+07	2.64356e+07	1.75824e+07	1.67744e+07	1.92107e+07	2.10418e+07	1.73523e+07	2.03146e+07	2.16081e+07
Q8A0R0	Uncharacterized protein OS=Bacteroides thetaiotaomicron (strain ATCC 29148 / DSM 2079 / NCTC 10582 / E50 / VPI-5482) OX=226186 GN=BT_3961 PE=4 SV=1	7.13057e+07	6.94794e+07	1.00419e+08	4.95124e+07	4.73037e+07	1.17146e+08	1.37539e+08	112319783	1.4906e+08	1.68363e+08
Q8A628	Putative isoprenyl synthetase OS=Bacteroides thetaiotaomicron (strain ATCC 29148 / DSM 2079 / NCTC 10582 / E50 / VPI-5482) OX=226186 GN=BT_2058 PE=3 SV=1	1.44256e+07	2.09245e+07	1.431e+07	1.06844e+07	1.02493e+07	2.04799e+07	2.78814e+07	2.42337e+07	2.48936e+07	1.45039e+07
Q8A0M3	GTP pyrophosphokinase OS=Bacteroides thetaiotaomicron (strain ATCC 29148 / DSM 2079 / NCTC 10582 / E50 / VPI-5482) OX=226186 GN=BT_3998 PE=3 SV=1	1.09501e+07	1.40714e+07	10756606	1.01027e+07	1.07175e+07	1.03052e+07	1.04373e+07	7.60632e+06	1.15562e+07	7.53487e+06
Q8A0X9	Branched-chain-amino-acid transaminase OS=Bacteroides thetaiotaomicron (strain ATCC 29148 / DSM 2079 / NCTC 10582 / E50 / VPI-5482) OX=226186 GN=BT_3892 PE=3 SV=1	5.94567e+07	6.47824e+07	6.05504e+07	6.02821e+07	6.0247e+07	8.64288e+07	7.19282e+07	7.59961e+07	8.38044e+07	6.49416e+07
Q8AB61	Dihydroorotase (DHOase) OS=Bacteroides thetaiotaomicron (strain ATCC 29148 / DSM 2079 / NCTC 10582 / E50 / VPI-5482) OX=226186 GN=BT_0250 PE=3 SV=1	2.42519e+07	1.71913e+07	2.13789e+07	1.86233e+07	1.95861e+07	2.0308e+07	2.04781e+07	2.38031e+07	1.62178e+07	2.16617e+07
Q8A0L8	5'-nucleotidase SurE OS=Bacteroides thetaiotaomicron (strain ATCC 29148 / DSM 2079 / NCTC 10582 / E50 / VPI-5482) OX=226186 GN=surE PE=3 SV=1	48733884	4.64172e+07	4.78167e+07	4.25609e+07	4.19865e+07	6.94178e+07	7.04114e+07	5.80905e+07	64308651	7.01108e+07
Q8A8R9	Methylglyoxal synthase OS=Bacteroides thetaiotaomicron (strain ATCC 29148 / DSM 2079 / NCTC 10582 / E50 / VPI-5482) OX=226186 GN=mgsA PE=3 SV=1	3.08259e+07	2.68562e+07	2.79313e+07	2.37644e+07	2.30903e+07	2.89999e+07	2.89317e+07	2.46932e+07	2.65156e+07	2.42971e+07
Q8A3C2	Uncharacterized protein OS=Bacteroides thetaiotaomicron (strain ATCC 29148 / DSM 2079 / NCTC 10582 / E50 / VPI-5482) OX=226186 GN=BT_3032 PE=4 SV=1	1.4846e+07	1.94722e+07	1.43391e+07	1.37464e+07	1.42568e+07	1.9621e+07	1.54855e+07	1.4258e+07	2.22827e+07	1.10573e+07
Q8A263	YqeY-like protein OS=Bacteroides thetaiotaomicron (strain ATCC 29148 / DSM 2079 / NCTC 10582 / E50 / VPI-5482) OX=226186 GN=BT_3443 PE=4 SV=1	6.80109e+07	8.71907e+07	8.7667e+07	7.32651e+07	7.38011e+07	9.00823e+07	7.96438e+07	7.72698e+07	1.12519e+08	6.96803e+07
Q9RQ13	L-fucose isomerase OS=Bacteroides thetaiotaomicron (strain ATCC 29148 / DSM 2079 / NCTC 10582 / E50 / VPI-5482) OX=226186 GN=fucI PE=3 SV=1	1.25426e+07	9.55308e+06	1.08646e+07	1.07209e+07	9.926e+06	6.58132e+06	6.82295e+06	5.84844e+06	6.94983e+06	6.54096e+06
Q8A725	AAA-ATPase_like domain-containing protein OS=Bacteroides thetaiotaomicron (strain ATCC 29148 / DSM 2079 / NCTC 10582 / E50 / VPI-5482) OX=226186 GN=BT_1700 PE=4 SV=1	8.08505e+06	6.79082e+06	7005679	7.08273e+06	5.88662e+06	5.6032e+06	5.38674e+06	4.17731e+06	5.33426e+06	6.38948e+06
Q8A639	Thymidylate synthase OS=Bacteroides thetaiotaomicron (strain ATCC 29148 / DSM 2079 / NCTC 10582 / E50 / VPI-5482) OX=226186 GN=thyA PE=3 SV=1	3.32593e+07	3.2876e+07	3.03282e+07	2.61419e+07	2.99404e+07	4.43963e+07	2.99948e+07	3.88109e+07	4.16612e+07	3.73577e+07
Q8A373	2,6-beta-D-fructofuranosidase OS=Bacteroides thetaiotaomicron (strain ATCC 29148 / DSM 2079 / NCTC 10582 / E50 / VPI-5482) OX=226186 GN=BT_3082 PE=3 SV=1	3.08518e+07	3.50263e+07	3.8375e+07	4.00598e+07	3.38398e+07	2.85807e+07	2.99426e+07	1.7783e+07	3.56981e+07	2.37416e+07
E7MCA2	Uncharacterized protein OS=Bacteroides thetaiotaomicron (strain ATCC 29148 / DSM 2079 / NCTC 10582 / E50 / VPI-5482) OX=226186 GN=BT_0631a PE=4 SV=1	9.39459e+07	9.33354e+07	9.3717e+07	9.16241e+07	6.99245e+07	1.0007e+08	7.51106e+07	5.0273e+07	1.2589e+08	6.58568e+07
Q8A9C4	Dihydroorotate dehydrogenase B (NAD(+)), electron transfer subunit OS=Bacteroides thetaiotaomicron (strain ATCC 29148 / DSM 2079 / NCTC 10582 / E50 / VPI-5482) OX=226186 GN=pyrK PE=3 SV=1	2.87989e+07	4.12966e+07	3.04924e+07	3.03381e+07	2.93537e+07	3.10209e+07	3.47874e+07	2.42341e+07	3.72904e+07	2.51001e+07
Q8A456	3-deoxy-D-manno-octulosonic acid transferase OS=Bacteroides thetaiotaomicron (strain ATCC 29148 / DSM 2079 / NCTC 10582 / E50 / VPI-5482) OX=226186 GN=BT_2747 PE=3 SV=1	1.43809e+07	1.36454e+07	1.23874e+07	1.33744e+07	1.22352e+07	1.21122e+07	1.02242e+07	9.45711e+06	1.3609e+07	1.042e+07
Q8A1F2	Phospholipid/glycerol acyltransferase OS=Bacteroides thetaiotaomicron (strain ATCC 29148 / DSM 2079 / NCTC 10582 / E50 / VPI-5482) OX=226186 GN=BT_3714 PE=4 SV=1	3.17537e+07	3.18197e+07	3.17968e+07	2.95213e+07	2.69687e+07	3.57824e+07	3.27806e+07	3.00438e+07	3.22873e+07	2.36615e+07
Q8AA94	Phenylacetate-coenzyme A ligase OS=Bacteroides thetaiotaomicron (strain ATCC 29148 / DSM 2079 / NCTC 10582 / E50 / VPI-5482) OX=226186 GN=BT_0571 PE=3 SV=1	1.29269e+07	1.29963e+07	1.31993e+07	1.2365e+07	1.01513e+07	9.84653e+06	9.95351e+06	7.55332e+06	1.03986e+07	1.02513e+07
Q8A626	Cytidylate kinase OS=Bacteroides thetaiotaomicron (strain ATCC 29148 / DSM 2079 / NCTC 10582 / E50 / VPI-5482) OX=226186 GN=cmk PE=3 SV=1	4.21452e+07	3.45199e+07	3.81017e+07	3.21611e+07	3.16598e+07	3.0535e+07	3.1641e+07	2.48313e+07	2.89576e+07	3.36676e+07
Q8A134	ABC transporter ATP-binding protein OS=Bacteroides thetaiotaomicron (strain ATCC 29148 / DSM 2079 / NCTC 10582 / E50 / VPI-5482) OX=226186 GN=BT_3837 PE=4 SV=1	1.8804e+07	1.63185e+07	1.7551e+07	1.5905e+07	1.35933e+07	1.55772e+07	1.48909e+07	1.294e+07	1.60407e+07	2.01322e+07
Q89YT0	Probable endonuclease 4 OS=Bacteroides thetaiotaomicron (strain ATCC 29148 / DSM 2079 / NCTC 10582 / E50 / VPI-5482) OX=226186 GN=nfo PE=3 SV=1	6.58023e+06	6.25897e+06	6.81432e+06	5.81394e+06	4.61587e+06	7.63705e+06	9.62157e+06	7.34683e+06	8.60547e+06	1.26522e+07
Q8AAH7	2-dehydro-3-deoxygluconokinase OS=Bacteroides thetaiotaomicron (strain ATCC 29148 / DSM 2079 / NCTC 10582 / E50 / VPI-5482) OX=226186 GN=BT_0488 PE=4 SV=1	5.02939e+07	4.27081e+07	4.26966e+07	4.93158e+07	4.15792e+07	3.97733e+07	4.21111e+07	3.45439e+07	4.03988e+07	4.29583e+07
Q8ABB0	ATP phosphoribosyltransferase OS=Bacteroides thetaiotaomicron (strain ATCC 29148 / DSM 2079 / NCTC 10582 / E50 / VPI-5482) OX=226186 GN=hisG PE=3 SV=1	2.29837e+07	2.52118e+07	1.7011e+07	2.07122e+07	1.90674e+07	2.80641e+07	2.25683e+07	2.06513e+07	2.69198e+07	2.70997e+07
Q8A0M2	Membrane-bound lytic murein transglycosylase D presursor OS=Bacteroides thetaiotaomicron (strain ATCC 29148 / DSM 2079 / NCTC 10582 / E50 / VPI-5482) OX=226186 GN=BT_3999 PE=3 SV=1	2.6706e+07	2.62116e+07	2.5131e+07	2.24709e+07	2.25751e+07	3.07221e+07	2.53314e+07	2.55343e+07	3.2554e+07	2.95653e+07
Q8ABA5	Glutamine-dependent NAD(+) synthetase OS=Bacteroides thetaiotaomicron (strain ATCC 29148 / DSM 2079 / NCTC 10582 / E50 / VPI-5482) OX=226186 GN=nadE PE=3 SV=1	2.99129e+07	2.69855e+07	2.71342e+07	2.65596e+07	2.28613e+07	2.52459e+07	2.69547e+07	2.4016e+07	2.59288e+07	2.83953e+07
Q8A0C1	Putative lipoprotein OS=Bacteroides thetaiotaomicron (strain ATCC 29148 / DSM 2079 / NCTC 10582 / E50 / VPI-5482) OX=226186 GN=BT_4100 PE=4 SV=1	3.36027e+06	4.53828e+06	3.3062e+06	2.94971e+06	2.51785e+06	4.27582e+06	3.36015e+06	3.12594e+06	6.01781e+06	4.56936e+06
Q8A1V9	Acetylornithine deacetylase OS=Bacteroides thetaiotaomicron (strain ATCC 29148 / DSM 2079 / NCTC 10582 / E50 / VPI-5482) OX=226186 GN=BT_3549 PE=1 SV=1	1.11942e+07	1.39062e+07	1.16765e+07	9.82883e+06	9.13676e+06	1.58883e+07	1.4699e+07	1.18124e+07	1.67668e+07	1.71117e+07
Q8A8R7	Alpha-glucan phosphorylase OS=Bacteroides thetaiotaomicron (strain ATCC 29148 / DSM 2079 / NCTC 10582 / E50 / VPI-5482) OX=226186 GN=BT_1100 PE=3 SV=1	8.59668e+06	8.94753e+06	8.644e+06	7.69874e+06	7.58697e+06	8.79751e+06	8.06826e+06	7.76624e+06	9.45664e+06	7.02345e+06
Q8A6L8	3-isopropylmalate dehydratase OS=Bacteroides thetaiotaomicron (strain ATCC 29148 / DSM 2079 / NCTC 10582 / E50 / VPI-5482) OX=226186 GN=BT_1859 PE=3 SV=1	1.60375e+07	2.51461e+07	2.06954e+07	1.63444e+07	1.54339e+07	2.10597e+07	1.76411e+07	1.61621e+07	2.47636e+07	1.65873e+07
Q8A0L9	ATPase, ParA family OS=Bacteroides thetaiotaomicron (strain ATCC 29148 / DSM 2079 / NCTC 10582 / E50 / VPI-5482) OX=226186 GN=BT_4002 PE=4 SV=1	1.23963e+07	1.63071e+07	1.33944e+07	1.13208e+07	1.16768e+07	1.68085e+07	9.65269e+06	1.2825e+07	1.7704e+07	9.16187e+06
Q8A9P5	Uncharacterized protein OS=Bacteroides thetaiotaomicron (strain ATCC 29148 / DSM 2079 / NCTC 10582 / E50 / VPI-5482) OX=226186 GN=BT_0770 PE=4 SV=1	3.70247e+07	3.96682e+07	4.0986e+07	2.76244e+07	2.48445e+07	37724822	3.40916e+07	2.91803e+07	3.89355e+07	2.94586e+07
Q8A9A6	von Willebrand factor-like, type A OS=Bacteroides thetaiotaomicron (strain ATCC 29148 / DSM 2079 / NCTC 10582 / E50 / VPI-5482) OX=226186 GN=BT_0909 PE=4 SV=1	4.33064e+07	3.18798e+07	3.57687e+07	3.28539e+07	3.22644e+07	2.69298e+07	2.56853e+07	2.86954e+07	2.97525e+07	2.86326e+07
Q8A614	Aconitate hydratase A OS=Bacteroides thetaiotaomicron (strain ATCC 29148 / DSM 2079 / NCTC 10582 / E50 / VPI-5482) OX=226186 GN=BT_2072 PE=4 SV=1	8.85743e+06	8.62952e+06	9.93462e+06	7.737e+06	6.20107e+06	9.40449e+06	1.04962e+07	7.71003e+06	1.10733e+07	1.19053e+07
Q8A003	Phosphate starvation-inducible protein, PhoH OS=Bacteroides thetaiotaomicron (strain ATCC 29148 / DSM 2079 / NCTC 10582 / E50 / VPI-5482) OX=226186 GN=BT_4218 PE=4 SV=1	6.84787e+06	8.81928e+06	5.56527e+06	5.32367e+06	6.66207e+06	9.94747e+06	7.32528e+06	7.55791e+06	9.63952e+06	7.77467e+06
Q8A8R3	Small heat shock protein OS=Bacteroides thetaiotaomicron (strain ATCC 29148 / DSM 2079 / NCTC 10582 / E50 / VPI-5482) OX=226186 GN=BT_1104 PE=3 SV=1	4.4903e+07	3.69163e+07	4.47077e+07	3.49221e+07	3.26241e+07	2.7356e+07	2.89387e+07	2.4266e+07	3.10692e+07	3.29366e+07
Q8A9D9	Putative deiminase OS=Bacteroides thetaiotaomicron (strain ATCC 29148 / DSM 2079 / NCTC 10582 / E50 / VPI-5482) OX=226186 GN=BT_0876 PE=4 SV=1	2.20728e+07	2.09889e+07	1.92452e+07	1.65083e+07	21100545	2.36203e+07	2.28368e+07	2.07932e+07	2.26556e+07	2.10939e+07
Q89Z61	Uncharacterized protein OS=Bacteroides thetaiotaomicron (strain ATCC 29148 / DSM 2079 / NCTC 10582 / E50 / VPI-5482) OX=226186 GN=BT_4516 PE=4 SV=1	9.20089e+06	8.6773e+06	9.08894e+06	6.25658e+06	7.95732e+06	1.03921e+07	7.2048e+06	6.72827e+06	1.08809e+07	9.88108e+06
Q8A993	S-layer domain containing protein OS=Bacteroides thetaiotaomicron (strain ATCC 29148 / DSM 2079 / NCTC 10582 / E50 / VPI-5482) OX=226186 GN=BT_0924 PE=4 SV=1	3.56629e+07	3.77366e+07	3.44961e+07	2.7915e+07	2.9887e+07	1.30258e+07	9.55452e+06	1.17281e+07	1.62101e+07	1.11614e+07
Q8A422	Long-chain-fatty-acid--CoA ligase OS=Bacteroides thetaiotaomicron (strain ATCC 29148 / DSM 2079 / NCTC 10582 / E50 / VPI-5482) OX=226186 GN=BT_2782 PE=4 SV=1	8.44002e+06	8.13438e+06	6.50351e+06	6.12657e+06	5.54567e+06	8.22556e+06	6.30901e+06	5.3812e+06	9.01009e+06	1.09709e+07
Q8A607	Peptidyl-prolyl cis-trans isomerase OS=Bacteroides thetaiotaomicron (strain ATCC 29148 / DSM 2079 / NCTC 10582 / E50 / VPI-5482) OX=226186 GN=BT_2079 PE=3 SV=1	7.00191e+07	1.11917e+08	1.08406e+08	8.63033e+07	9.55861e+07	1.22235e+08	9.06437e+07	9.63981e+07	128017217	70690962
Q8A7Z5	1-(5-phosphoribosyl)-5-[(5-phosphoribosylamino)methylideneamino] imidazole-4-carboxamide isomerase OS=Bacteroides thetaiotaomicron (strain ATCC 29148 / DSM 2079 / NCTC 10582 / E50 / VPI-5482) OX=226186 GN=hisA PE=3 SV=1	9.68887e+06	8.91963e+06	1.01833e+07	7.67558e+06	6.22843e+06	9.78765e+06	1.32461e+07	7.2548e+06	1.01024e+07	1.71009e+07
Q8A481	50S ribosomal protein L22 OS=Bacteroides thetaiotaomicron (strain ATCC 29148 / DSM 2079 / NCTC 10582 / E50 / VPI-5482) OX=226186 GN=rplV PE=3 SV=1	2.98712e+08	3.86635e+08	2.65761e+08	3.75462e+08	3.99344e+08	4.50235e+08	3.10713e+08	4.43524e+08	449152463	2.81865e+08
Q8A684	1-deoxy-D-xylulose 5-phosphate reductoisomerase OS=Bacteroides thetaiotaomicron (strain ATCC 29148 / DSM 2079 / NCTC 10582 / E50 / VPI-5482) OX=226186 GN=dxr PE=3 SV=1	1.45659e+07	2.0354e+07	1.51241e+07	1.24128e+07	1.21074e+07	14976242	1.45838e+07	1.22535e+07	1.59831e+07	1.76337e+07
Q9RQ15	30S ribosomal protein S16 OS=Bacteroides thetaiotaomicron (strain ATCC 29148 / DSM 2079 / NCTC 10582 / E50 / VPI-5482) OX=226186 GN=rpsP PE=3 SV=1	9.40384e+07	176862634	1.06298e+08	1.42709e+08	199139176	3.11475e+08	2.26929e+08	3.04197e+08	2.72369e+08	7.93753e+07
Q8A1N7	Glycoside transferase family 2 OS=Bacteroides thetaiotaomicron (strain ATCC 29148 / DSM 2079 / NCTC 10582 / E50 / VPI-5482) OX=226186 GN=BT_3622 PE=4 SV=1	1.22114e+07	1.15359e+07	1.15074e+07	1.14097e+07	1.4689e+07	1.62233e+07	1.44483e+07	1.5187e+07	1.47515e+07	8.64327e+06
Q8A0S6	Methionyl-tRNA formyltransferase OS=Bacteroides thetaiotaomicron (strain ATCC 29148 / DSM 2079 / NCTC 10582 / E50 / VPI-5482) OX=226186 GN=fmt PE=3 SV=1	1.86915e+07	1.88531e+07	1.84014e+07	1.8526e+07	1.75948e+07	2.19267e+07	2.01858e+07	1.63974e+07	2.46664e+07	2.46338e+07
Q8A0L4	ATP-dependent zinc metalloprotease FtsH OS=Bacteroides thetaiotaomicron (strain ATCC 29148 / DSM 2079 / NCTC 10582 / E50 / VPI-5482) OX=226186 GN=ftsH PE=3 SV=1	2.50845e+07	2.89067e+07	2.11771e+07	2.02277e+07	2.70061e+07	2.4991e+07	1.80894e+07	2.80147e+07	3.0221e+07	1.56857e+07
Q8A446	L-asparaginase II OS=Bacteroides thetaiotaomicron (strain ATCC 29148 / DSM 2079 / NCTC 10582 / E50 / VPI-5482) OX=226186 GN=BT_2757 PE=3 SV=1	7.80739e+06	1.32514e+07	7.94725e+06	8.6084e+06	9.71899e+06	7.52069e+06	4.54175e+06	3.863e+06	4.74678e+06	2.49518e+06
Q8A6P1	Thiamine biosynthesis protein ThiH OS=Bacteroides thetaiotaomicron (strain ATCC 29148 / DSM 2079 / NCTC 10582 / E50 / VPI-5482) OX=226186 GN=BT_1836 PE=4 SV=1	3.85297e+06	5.21605e+06	4.27839e+06	1.98522e+06	3.76997e+06	4.83793e+06	5.16577e+06	4.35468e+06	6.33131e+06	4.75981e+06
Q8A1T2	Putative ribokinase OS=Bacteroides thetaiotaomicron (strain ATCC 29148 / DSM 2079 / NCTC 10582 / E50 / VPI-5482) OX=226186 GN=BT_3576 PE=4 SV=1	1.15789e+07	1.01594e+07	9.63041e+06	7.8367e+06	7.83607e+06	1.05202e+07	9.14204e+06	9.21051e+06	1.05517e+07	1.25581e+07
Q8A083	Putative aminotransferase OS=Bacteroides thetaiotaomicron (strain ATCC 29148 / DSM 2079 / NCTC 10582 / E50 / VPI-5482) OX=226186 GN=BT_4138 PE=4 SV=1	1.84016e+07	1.49518e+07	1.57383e+07	1.48766e+07	1.35347e+07	1.73829e+07	1.16044e+07	1.24088e+07	1.52363e+07	1.52108e+07
Q8AA76	Membrane protein insertase YidC OS=Bacteroides thetaiotaomicron (strain ATCC 29148 / DSM 2079 / NCTC 10582 / E50 / VPI-5482) OX=226186 GN=yidC PE=3 SV=1	1.15599e+07	1.84649e+07	1.12462e+07	1.12932e+07	2.03671e+07	1.51207e+07	7.29903e+06	1.61421e+07	1.69277e+07	8.00728e+06
Q8A465	50S ribosomal protein L11 OS=Bacteroides thetaiotaomicron (strain ATCC 29148 / DSM 2079 / NCTC 10582 / E50 / VPI-5482) OX=226186 GN=rplK PE=3 SV=1	4.95208e+08	5.00949e+08	4.41473e+08	4.34761e+08	4.55024e+08	5.8255e+08	4.79799e+08	5.36046e+08	5.88869e+08	5.6399e+08
Q8A090	Putative haloacid dehalogenase-like hydrolase OS=Bacteroides thetaiotaomicron (strain ATCC 29148 / DSM 2079 / NCTC 10582 / E50 / VPI-5482) OX=226186 GN=BT_4131 PE=1 SV=1	8.9559e+06	1.68144e+07	9.30003e+06	9.39138e+06	1.22172e+07	1.61933e+07	1.45215e+07	1.25546e+07	1.64383e+07	1.11213e+07
Q8AB59	Transcription-repair-coupling factor OS=Bacteroides thetaiotaomicron (strain ATCC 29148 / DSM 2079 / NCTC 10582 / E50 / VPI-5482) OX=226186 GN=mfd PE=3 SV=1	7.666e+06	8.81388e+06	6.73023e+06	6.0421e+06	6.14456e+06	7.83323e+06	8.09057e+06	5.72862e+06	8.4695e+06	6.44077e+06
Q89Z74	MaoC-like domain-containing protein OS=Bacteroides thetaiotaomicron (strain ATCC 29148 / DSM 2079 / NCTC 10582 / E50 / VPI-5482) OX=226186 GN=BT_4503 PE=4 SV=1	1.07986e+08	9.83898e+07	9.9373e+07	8.42637e+07	8.51451e+07	1.02851e+08	1.10104e+08	9.41447e+07	1.03205e+08	1.17781e+08
Q8A857	Riboflavin synthase alpha chain OS=Bacteroides thetaiotaomicron (strain ATCC 29148 / DSM 2079 / NCTC 10582 / E50 / VPI-5482) OX=226186 GN=BT_1317 PE=4 SV=1	2.80493e+07	4.1408e+07	3.08483e+07	3.88807e+07	3.31012e+07	5.69415e+07	6.27607e+07	4.97166e+07	5.80614e+07	4.25726e+07
Q8A0H5	AAA-ATPase_like domain-containing protein OS=Bacteroides thetaiotaomicron (strain ATCC 29148 / DSM 2079 / NCTC 10582 / E50 / VPI-5482) OX=226186 GN=BT_4046 PE=4 SV=1	1.11064e+07	1.04644e+07	1.06546e+07	9.57664e+06	8.09404e+06	1.01621e+07	8.433e+06	5.58813e+06	1.09104e+07	9586813
Q8A6Z4	Uncharacterized protein OS=Bacteroides thetaiotaomicron (strain ATCC 29148 / DSM 2079 / NCTC 10582 / E50 / VPI-5482) OX=226186 GN=BT_1731 PE=4 SV=1	1.23527e+07	1.41006e+07	1.06316e+07	5.81003e+06	1.08568e+07	1.04649e+07	7.60449e+06	7.85981e+06	1.18581e+07	7.73385e+06
Q8A4A0	30S ribosomal protein S11 OS=Bacteroides thetaiotaomicron (strain ATCC 29148 / DSM 2079 / NCTC 10582 / E50 / VPI-5482) OX=226186 GN=rpsK PE=3 SV=1	2.11239e+08	1.63996e+08	1.58598e+08	1.58709e+08	143488081	1.27821e+08	1.34622e+08	1.40086e+08	1.38161e+08	1.37623e+08
Q8A636	Putative lipoprotein OS=Bacteroides thetaiotaomicron (strain ATCC 29148 / DSM 2079 / NCTC 10582 / E50 / VPI-5482) OX=226186 GN=BT_2050 PE=4 SV=1	1.01496e+07	8092517	1.16392e+07	8.7464e+06	7.61296e+06	9.83194e+06	1.02962e+07	8.82681e+06	1.16682e+07	1.44322e+07
Q8A487	50S ribosomal protein L24 OS=Bacteroides thetaiotaomicron (strain ATCC 29148 / DSM 2079 / NCTC 10582 / E50 / VPI-5482) OX=226186 GN=rplX PE=3 SV=1	2.55669e+08	2.13067e+08	2.27285e+08	1.97624e+08	2.78715e+08	3.02229e+08	265600493	3.14354e+08	2.45245e+08	2.79298e+08
Q8A418	30S ribosomal protein S15 OS=Bacteroides thetaiotaomicron (strain ATCC 29148 / DSM 2079 / NCTC 10582 / E50 / VPI-5482) OX=226186 GN=rpsO PE=3 SV=1	2.63628e+08	2.36657e+08	2.36515e+08	2.14198e+08	2.84374e+08	3.71139e+08	2.62642e+08	2.94099e+08	3.11301e+08	2.54413e+08
Q8ABE1	Putative endonuclease/exonuclease/phosphatase OS=Bacteroides thetaiotaomicron (strain ATCC 29148 / DSM 2079 / NCTC 10582 / E50 / VPI-5482) OX=226186 GN=BT_0169 PE=4 SV=1	1.10343e+07	1.51767e+07	1.03261e+07	7.34089e+06	1.30509e+07	1.46939e+07	1.23527e+07	1.16163e+07	1.53292e+07	9.82048e+06
Q8A2R5	SusC homolog OS=Bacteroides thetaiotaomicron (strain ATCC 29148 / DSM 2079 / NCTC 10582 / E50 / VPI-5482) OX=226186 GN=BT_3240 PE=3 SV=1	1.03685e+07	1.05453e+07	1.04932e+07	1.03643e+07	1.17703e+07	2.05211e+07	2.08729e+07	1.84714e+07	2.42573e+07	2.05401e+07
Q8A0X6	Iron-sulfur cluster carrier protein OS=Bacteroides thetaiotaomicron (strain ATCC 29148 / DSM 2079 / NCTC 10582 / E50 / VPI-5482) OX=226186 GN=BT_3895 PE=3 SV=1	5.69154e+07	4.82028e+07	4.99668e+07	5.05083e+07	4.68596e+07	6.5548e+07	5.17393e+07	4.33637e+07	6.28037e+07	5.66081e+07
Q89ZL4	Putative alkaline phosphatase OS=Bacteroides thetaiotaomicron (strain ATCC 29148 / DSM 2079 / NCTC 10582 / E50 / VPI-5482) OX=226186 GN=BT_4363 PE=4 SV=1	1.97591e+07	2.28199e+07	2.31476e+07	1.88159e+07	1.74467e+07	22311188	2.48124e+07	1.7641e+07	2.40608e+07	1.85889e+07
Q8A9E0	Beta-ureidopropionase OS=Bacteroides thetaiotaomicron (strain ATCC 29148 / DSM 2079 / NCTC 10582 / E50 / VPI-5482) OX=226186 GN=BT_0875 PE=4 SV=1	4.52044e+07	4.40772e+07	4.02251e+07	4.26386e+07	3.56979e+07	3.91896e+07	4.30081e+07	3.21218e+07	4.28164e+07	3.75321e+07
Q8A3X4	DNA-binding protein HU-beta OS=Bacteroides thetaiotaomicron (strain ATCC 29148 / DSM 2079 / NCTC 10582 / E50 / VPI-5482) OX=226186 GN=BT_2830 PE=3 SV=1	9.86332e+07	1.139e+08	9.95155e+07	9.45973e+07	1.11925e+08	1.27585e+08	9.08493e+07	9.8569e+07	1.23588e+08	5.80912e+07
Q8A7P5	ABC transporter ATP-binding protein OS=Bacteroides thetaiotaomicron (strain ATCC 29148 / DSM 2079 / NCTC 10582 / E50 / VPI-5482) OX=226186 GN=BT_1479 PE=4 SV=1	9.56906e+06	9.79368e+06	1.004e+07	9.36296e+06	9.7367e+06	1.42251e+07	1.34136e+07	1.17519e+07	1.41321e+07	1.38395e+07
Q89Z20	TPR_REGION domain-containing protein OS=Bacteroides thetaiotaomicron (strain ATCC 29148 / DSM 2079 / NCTC 10582 / E50 / VPI-5482) OX=226186 GN=BT_4557 PE=4 SV=1	9.55306e+06	1.11803e+07	9.00392e+06	8.7619e+06	9.94194e+06	1.07821e+07	1.00854e+07	8.60068e+06	1.04294e+07	7.8488e+06
Q8A9U6	ATP synthase gamma chain OS=Bacteroides thetaiotaomicron (strain ATCC 29148 / DSM 2079 / NCTC 10582 / E50 / VPI-5482) OX=226186 GN=atpG PE=3 SV=1	3.03803e+07	2.52355e+07	3.05299e+07	2.47154e+07	2.30075e+07	6.57087e+06	6.01995e+06	4.50979e+06	6.60464e+06	7.55626e+06
Q8A745	Putative NADH dehydrogenase/NAD(P)H nitroreductase OS=Bacteroides thetaiotaomicron (strain ATCC 29148 / DSM 2079 / NCTC 10582 / E50 / VPI-5482) OX=226186 GN=BT_1680 PE=4 SV=1	1.66626e+07	26377611	1.5734e+07	1.26297e+07	1.43042e+07	2.27663e+07	2.00332e+07	1.94865e+07	2.24751e+07	2.24209e+07
Q8A9W7	3-methyl-2-oxobutanoate hydroxymethyltransferase OS=Bacteroides thetaiotaomicron (strain ATCC 29148 / DSM 2079 / NCTC 10582 / E50 / VPI-5482) OX=226186 GN=panB PE=3 SV=1	2.33224e+07	3.93835e+07	2.39758e+07	2.43184e+07	2.8033e+07	3.40879e+07	2.94472e+07	2.73706e+07	3.23913e+07	3.00309e+07
Q8A863	RNA polymerase sigma factor rpoD (Sigma-A) OS=Bacteroides thetaiotaomicron (strain ATCC 29148 / DSM 2079 / NCTC 10582 / E50 / VPI-5482) OX=226186 GN=BT_1311 PE=4 SV=1	3.62055e+07	4.57287e+07	2.95789e+07	3.11159e+07	3.13263e+07	3.55657e+07	3.06405e+07	3.07661e+07	3.20415e+07	2.57631e+07
Q8A609	Acetolactate synthase OS=Bacteroides thetaiotaomicron (strain ATCC 29148 / DSM 2079 / NCTC 10582 / E50 / VPI-5482) OX=226186 GN=BT_2077 PE=3 SV=1	9.4244e+06	9.44535e+06	8.62805e+06	6.95476e+06	7.48245e+06	1.0774e+07	1.08211e+07	9.81344e+06	1.0947e+07	1.13779e+07
Q8A2P4	Octaprenyl-diphosphate synthase OS=Bacteroides thetaiotaomicron (strain ATCC 29148 / DSM 2079 / NCTC 10582 / E50 / VPI-5482) OX=226186 GN=BT_3261 PE=1 SV=1	1.06236e+07	9.42406e+06	9.71176e+06	9.02238e+06	9.08541e+06	1.1412e+07	9.63297e+06	8.30165e+06	1.08727e+07	8.67645e+06
Q8A6R1	Low-specificity L-threonine aldolase OS=Bacteroides thetaiotaomicron (strain ATCC 29148 / DSM 2079 / NCTC 10582 / E50 / VPI-5482) OX=226186 GN=BT_1815 PE=4 SV=1	8.64005e+06	7.96886e+06	7.78722e+06	5.92448e+06	5.59121e+06	9.01856e+06	8.95807e+06	7.40856e+06	1.03052e+07	7.69767e+06
Q8A8E2	GDP-L-fucose synthase OS=Bacteroides thetaiotaomicron (strain ATCC 29148 / DSM 2079 / NCTC 10582 / E50 / VPI-5482) OX=226186 GN=fcl PE=3 SV=1	6.35245e+07	4.90922e+07	4.27378e+07	5.87768e+07	5.61621e+07	4.97728e+07	3.52491e+07	4.41841e+07	45752494	3.90585e+07
Q89Z23	Purine nucleoside phosphorylase II OS=Bacteroides thetaiotaomicron (strain ATCC 29148 / DSM 2079 / NCTC 10582 / E50 / VPI-5482) OX=226186 GN=BT_4554 PE=4 SV=1	3.13884e+07	2.8071e+07	2.87688e+07	2.3339e+07	2.33063e+07	2.24068e+07	2.22344e+07	1.88932e+07	2.35103e+07	2.46037e+07
Q8A845	Thiol peroxidase OS=Bacteroides thetaiotaomicron (strain ATCC 29148 / DSM 2079 / NCTC 10582 / E50 / VPI-5482) OX=226186 GN=tpx PE=3 SV=1	1.7392e+08	1.50802e+08	1.89272e+08	1.57283e+08	1.43623e+08	2.20685e+08	2.18378e+08	1.75119e+08	2.31657e+08	1.93318e+08
Q8A6D2	Fe3+ ABC transporter, periplasmic iron-binding protein OS=Bacteroides thetaiotaomicron (strain ATCC 29148 / DSM 2079 / NCTC 10582 / E50 / VPI-5482) OX=226186 GN=BT_1952 PE=4 SV=1	1.00999e+07	1.07595e+07	9.49191e+06	7.88457e+06	1.11716e+07	1.29792e+07	6.17913e+06	1.03233e+07	1.50089e+07	6.38215e+06
Q8A1A8	Acetylornithine aminotransferase OS=Bacteroides thetaiotaomicron (strain ATCC 29148 / DSM 2079 / NCTC 10582 / E50 / VPI-5482) OX=226186 GN=BT_3758 PE=3 SV=1	9.13944e+06	8.69498e+06	8.86181e+06	7.90325e+06	8.11972e+06	1.25178e+07	1.16762e+07	8.35944e+06	1.30121e+07	1.35789e+07
Q8A0L1	Uncharacterized protein OS=Bacteroides thetaiotaomicron (strain ATCC 29148 / DSM 2079 / NCTC 10582 / E50 / VPI-5482) OX=226186 GN=BT_4010 PE=4 SV=1	1.1424e+07	1.21174e+07	1.07901e+07	1.06204e+07	1.02324e+07	1.42051e+07	1.4669e+07	1.24868e+07	1.46944e+07	1.26042e+07
Q8A166	RteB, two-component system response regulator OS=Bacteroides thetaiotaomicron (strain ATCC 29148 / DSM 2079 / NCTC 10582 / E50 / VPI-5482) OX=226186 GN=BT_3801 PE=4 SV=1	4.17346e+06	4.15596e+06	3.40235e+06	1.41087e+06	1.87673e+06	3.71298e+06	3.65759e+06	2.71189e+06	3.41506e+06	4.93274e+06
Q8AAP7	PCMD domain-containing protein OS=Bacteroides thetaiotaomicron (strain ATCC 29148 / DSM 2079 / NCTC 10582 / E50 / VPI-5482) OX=226186 GN=BT_0417 PE=4 SV=1	1.63677e+07	2.10341e+07	1.60517e+07	1.56199e+07	1.52641e+07	1.61192e+07	1.4603e+07	1.28586e+07	1.4638e+07	1.44627e+07
Q8A1L2	Putative modulator of DNA gyrase OS=Bacteroides thetaiotaomicron (strain ATCC 29148 / DSM 2079 / NCTC 10582 / E50 / VPI-5482) OX=226186 GN=BT_3649 PE=1 SV=1	1.75656e+07	2.65783e+07	1.5887e+07	1.45091e+07	1.78394e+07	2.04899e+07	1.41817e+07	1.65444e+07	2.21426e+07	1.62153e+07
Q8A848	TPR domain-containing protein OS=Bacteroides thetaiotaomicron (strain ATCC 29148 / DSM 2079 / NCTC 10582 / E50 / VPI-5482) OX=226186 GN=BT_1326 PE=4 SV=1	6.1472e+06	5.71606e+06	5.64007e+06	5.28908e+06	5.17248e+06	7.30822e+06	6.5576e+06	5.71549e+06	8.74767e+06	6.93362e+06
Q8A947	D-ribitol-5-phosphate phosphatase OS=Bacteroides thetaiotaomicron (strain ATCC 29148 / DSM 2079 / NCTC 10582 / E50 / VPI-5482) OX=226186 GN=BT_0970 PE=1 SV=1	1.0358e+07	1.37537e+07	1.02227e+07	8.85998e+06	1.58664e+07	3.77295e+07	2.94652e+07	3.27014e+07	3.4619e+07	2.25799e+07
Q89ZR2	50S ribosomal protein L21 OS=Bacteroides thetaiotaomicron (strain ATCC 29148 / DSM 2079 / NCTC 10582 / E50 / VPI-5482) OX=226186 GN=rplU PE=3 SV=1	4.66525e+08	4.44409e+08	3.9608e+08	3.39146e+08	4.30335e+08	5.59498e+08	4.50287e+08	4.95638e+08	5.80053e+08	4.93881e+08
Q8A6E8	Uncharacterized protein OS=Bacteroides thetaiotaomicron (strain ATCC 29148 / DSM 2079 / NCTC 10582 / E50 / VPI-5482) OX=226186 GN=BT_1936 PE=4 SV=1	4.45741e+06	6.24923e+06	5.26533e+06	2.58476e+06	4.44711e+06	6.4951e+06	3.30117e+06	3.50624e+06	6.90444e+06	5.72475e+06
Q8A737	Biotin carboxyl carrier protein (BCCP) OS=Bacteroides thetaiotaomicron (strain ATCC 29148 / DSM 2079 / NCTC 10582 / E50 / VPI-5482) OX=226186 GN=BT_1688 PE=4 SV=1	3.63436e+07	6.33614e+07	3.66949e+07	2.06259e+07	27996481	3.2007e+07	4.06356e+07	2.99886e+07	28031302	4.03086e+07
Q8A829	Glycosyltransferase OS=Bacteroides thetaiotaomicron (strain ATCC 29148 / DSM 2079 / NCTC 10582 / E50 / VPI-5482) OX=226186 GN=BT_1345 PE=4 SV=1	1.42858e+07	1.10863e+07	9.45444e+06	1.07082e+07	1.18541e+07	2.26228e+07	2.05561e+07	1.79602e+07	2.40683e+07	2.19324e+07
Q8A0T6	Aminotransferase OS=Bacteroides thetaiotaomicron (strain ATCC 29148 / DSM 2079 / NCTC 10582 / E50 / VPI-5482) OX=226186 GN=BT_3935 PE=3 SV=1	1.02751e+07	1.35705e+07	8.24113e+06	8.01623e+06	1.00815e+07	7.51039e+06	4.34619e+06	3.84995e+06	9.24931e+06	5.94684e+06
Q8A813	DNA repair protein RecN OS=Bacteroides thetaiotaomicron (strain ATCC 29148 / DSM 2079 / NCTC 10582 / E50 / VPI-5482) OX=226186 GN=BT_1361 PE=3 SV=1	1.03102e+07	8.3448e+06	9.65413e+06	7.08824e+06	5.92822e+06	1.11544e+07	1.01966e+07	6.96775e+06	1.35085e+07	1.29807e+07
Q8A9T5	Putative mRNA-binding protein OS=Bacteroides thetaiotaomicron (strain ATCC 29148 / DSM 2079 / NCTC 10582 / E50 / VPI-5482) OX=226186 GN=BT_0730 PE=4 SV=1	1.37573e+07	1.29231e+07	1.29587e+07	7.41853e+06	9.37095e+06	1.06856e+07	9.07769e+06	9.06422e+06	1.06082e+07	1.07649e+07
Q8A883	Spermidine/putrescine import ATP-binding protein PotA OS=Bacteroides thetaiotaomicron (strain ATCC 29148 / DSM 2079 / NCTC 10582 / E50 / VPI-5482) OX=226186 GN=potA PE=3 SV=1	7.51695e+06	1.35994e+07	7.46617e+06	1.03653e+07	8.48979e+06	1.28854e+07	1.19105e+07	1.08836e+07	1.26783e+07	8.74216e+06
Q8A0B5	4-deoxy-L-threo-5-hexosulose-uronate ketol-isomerase 2 OS=Bacteroides thetaiotaomicron (strain ATCC 29148 / DSM 2079 / NCTC 10582 / E50 / VPI-5482) OX=226186 GN=kduI2 PE=3 SV=2	101659220	8.11244e+07	7.06595e+07	9.55431e+07	6.58714e+07	6.27671e+07	6.94071e+07	4.08869e+07	7.19303e+07	5.6887e+07
Q89ZM7	Tetrapyrrole methylase family protein/MazG family OS=Bacteroides thetaiotaomicron (strain ATCC 29148 / DSM 2079 / NCTC 10582 / E50 / VPI-5482) OX=226186 GN=BT_4350 PE=4 SV=1	1.87587e+07	2.056e+07	2.1316e+07	1.49755e+07	1.59701e+07	1.51517e+07	1.65054e+07	1.31466e+07	2.11358e+07	1.78517e+07
Q8A0P0	Uncharacterized protein OS=Bacteroides thetaiotaomicron (strain ATCC 29148 / DSM 2079 / NCTC 10582 / E50 / VPI-5482) OX=226186 GN=BT_3981 PE=4 SV=1	8.23609e+07	1.07149e+08	8.43838e+07	7.31416e+07	8.70749e+07	6.28995e+07	5.50597e+07	7.11712e+07	7.27701e+07	4.62274e+07
Q8A0T8	Chorismate mutase/prephenate dehydratase (TyrA) OS=Bacteroides thetaiotaomicron (strain ATCC 29148 / DSM 2079 / NCTC 10582 / E50 / VPI-5482) OX=226186 GN=BT_3933 PE=4 SV=1	2.26217e+07	2.60425e+07	1.63388e+07	1.89958e+07	2.06086e+07	2.37863e+07	2.06136e+07	1.98673e+07	2.86151e+07	1.65033e+07
Q89YQ3	L-serine dehydratase OS=Bacteroides thetaiotaomicron (strain ATCC 29148 / DSM 2079 / NCTC 10582 / E50 / VPI-5482) OX=226186 GN=BT_4678 PE=3 SV=1	1.51385e+07	1.56554e+07	1.634e+07	1.17372e+07	1.40363e+07	1.57963e+07	1.50279e+07	1.37885e+07	1.65081e+07	1.43908e+07
Q8A131	Putative RNA-binding protein rbpA OS=Bacteroides thetaiotaomicron (strain ATCC 29148 / DSM 2079 / NCTC 10582 / E50 / VPI-5482) OX=226186 GN=BT_3840 PE=4 SV=1	2.58792e+08	2.3164e+08	2.43798e+08	1.88438e+08	1.92463e+08	231946810	2.54137e+08	2.07024e+08	2.35786e+08	2.67134e+08
Q8AA27	Methionine aminopeptidase OS=Bacteroides thetaiotaomicron (strain ATCC 29148 / DSM 2079 / NCTC 10582 / E50 / VPI-5482) OX=226186 GN=map PE=3 SV=1	9.86615e+06	1.28962e+07	1.32445e+07	1.10684e+07	1.17373e+07	1.58072e+07	1.64376e+07	1.37704e+07	1.56911e+07	1.69647e+07
Q8A606	UPF0597 protein BT_2080 OS=Bacteroides thetaiotaomicron (strain ATCC 29148 / DSM 2079 / NCTC 10582 / E50 / VPI-5482) OX=226186 GN=BT_2080 PE=3 SV=1	4.15254e+06	5.89992e+06	3.49299e+06	3.05526e+06	3.95771e+06	8.07601e+06	6.16601e+06	6.4454e+06	8.89629e+06	4.74349e+06
Q8A6B0	tRNA nucleotidyltransferase OS=Bacteroides thetaiotaomicron (strain ATCC 29148 / DSM 2079 / NCTC 10582 / E50 / VPI-5482) OX=226186 GN=BT_1975 PE=3 SV=1	1.47155e+07	15910859	1.27016e+07	1.10219e+07	1.04055e+07	1.66572e+07	1.60367e+07	13032170	1.63887e+07	1.64585e+07
Q89ZC2	Oxidoreductase, putative glycolate oxidase OS=Bacteroides thetaiotaomicron (strain ATCC 29148 / DSM 2079 / NCTC 10582 / E50 / VPI-5482) OX=226186 GN=BT_4455 PE=4 SV=1	5.21034e+06	6.23366e+06	6.34008e+06	4.30751e+06	6.3324e+06	9.63011e+06	3.36541e+06	5.43647e+06	8.37799e+06	5.61846e+06
Q8A763	Putative molybdenum transport ATP-binding protein OS=Bacteroides thetaiotaomicron (strain ATCC 29148 / DSM 2079 / NCTC 10582 / E50 / VPI-5482) OX=226186 GN=BT_1662 PE=4 SV=1	8.13593e+06	7881045	9.5152e+06	8.23303e+06	5.55905e+06	5.24027e+06	7.56564e+06	4.44559e+06	5.96155e+06	3.41266e+06
Q8A0U0	GTP cyclohydrolase 1 OS=Bacteroides thetaiotaomicron (strain ATCC 29148 / DSM 2079 / NCTC 10582 / E50 / VPI-5482) OX=226186 GN=folE PE=3 SV=1	1.72297e+07	17844753	1.74797e+07	1.57491e+07	1.84598e+07	2.31058e+07	2.22645e+07	2.09374e+07	2.05511e+07	2.03086e+07
Q8A767	Probable transaldolase OS=Bacteroides thetaiotaomicron (strain ATCC 29148 / DSM 2079 / NCTC 10582 / E50 / VPI-5482) OX=226186 GN=tal PE=3 SV=1	1.9548e+07	1.79933e+07	2.40358e+07	1.86839e+07	1.41676e+07	1.19384e+07	1.92387e+07	11331538	1.53292e+07	2.00173e+07
Q8A3V4	Putative two-component system sensor histidine kinase OS=Bacteroides thetaiotaomicron (strain ATCC 29148 / DSM 2079 / NCTC 10582 / E50 / VPI-5482) OX=226186 GN=BT_2850 PE=4 SV=1	1.37488e+07	1.10259e+07	1.30322e+07	1.22168e+07	1.13926e+07	9.57311e+06	9.50782e+06	1.04334e+07	1.22456e+07	1.03704e+07
Q8A5V8	Fucose kinase OS=Bacteroides thetaiotaomicron (strain ATCC 29148 / DSM 2079 / NCTC 10582 / E50 / VPI-5482) OX=226186 GN=BT_2128 PE=4 SV=1	3.46091e+06	4.25915e+06	4.54982e+06	4.63504e+06	4.33284e+06	5.90508e+06	5.76544e+06	4.35782e+06	7.90839e+06	4.25831e+06
Q8AAQ1	Adenylyl-sulfate kinase OS=Bacteroides thetaiotaomicron (strain ATCC 29148 / DSM 2079 / NCTC 10582 / E50 / VPI-5482) OX=226186 GN=cysC PE=3 SV=1	2.3412e+07	2.32213e+07	2.22085e+07	1.8403e+07	2.02892e+07	1.06674e+07	1.21698e+07	1.50318e+07	1.64924e+07	8.9696e+06
Q8A1A9	Pyrroline-5-carboxylate reductase OS=Bacteroides thetaiotaomicron (strain ATCC 29148 / DSM 2079 / NCTC 10582 / E50 / VPI-5482) OX=226186 GN=proC PE=3 SV=1	3.36918e+07	3.11336e+07	30817753	4.01212e+07	2.53521e+07	1.85158e+07	1.66489e+07	1.47353e+07	1.99148e+07	2.07122e+07
Q8A382	tRNA-dihydrouridine synthase OS=Bacteroides thetaiotaomicron (strain ATCC 29148 / DSM 2079 / NCTC 10582 / E50 / VPI-5482) OX=226186 GN=BT_3073 PE=3 SV=1	9.85671e+06	9.61372e+06	1.03876e+07	7.9851e+06	7.51361e+06	1.16376e+07	1.03959e+07	9.8859e+06	1.23388e+07	1.24552e+07
Q8A0L3	Ribosomal silencing factor RsfS OS=Bacteroides thetaiotaomicron (strain ATCC 29148 / DSM 2079 / NCTC 10582 / E50 / VPI-5482) OX=226186 GN=rsfS PE=3 SV=1	2.2465e+07	2.77427e+07	1.82557e+07	1.84322e+07	2.33673e+07	2.96116e+07	2.22668e+07	1.95089e+07	2.74834e+07	1.82667e+07
Q89YL6	Non-specific DNA-binding protein Dps OS=Bacteroides thetaiotaomicron (strain ATCC 29148 / DSM 2079 / NCTC 10582 / E50 / VPI-5482) OX=226186 GN=BT_4715 PE=3 SV=1	1.64383e+07	1.74207e+07	1.13804e+07	1.09651e+07	7.49817e+06	6.26092e+06	7.38651e+06	4.75825e+06	5.89903e+06	6.95484e+06
Q8AAZ8	Ribosomal protein L11 methyltransferase OS=Bacteroides thetaiotaomicron (strain ATCC 29148 / DSM 2079 / NCTC 10582 / E50 / VPI-5482) OX=226186 GN=prmA PE=3 SV=1	1.34365e+07	1.88867e+07	1.03694e+07	1.00367e+07	1.52419e+07	1.90385e+07	12187698	1.44316e+07	1.87573e+07	1.2004e+07
Q8A136	GTPase Era OS=Bacteroides thetaiotaomicron (strain ATCC 29148 / DSM 2079 / NCTC 10582 / E50 / VPI-5482) OX=226186 GN=era PE=3 SV=1	3.48479e+07	2.44029e+07	2.36914e+07	3.02837e+07	2.92684e+07	4.58218e+07	3.20099e+07	2.68806e+07	3.18693e+07	3.56102e+07
Q8A9W5	GTP pyrophosphokinase OS=Bacteroides thetaiotaomicron (strain ATCC 29148 / DSM 2079 / NCTC 10582 / E50 / VPI-5482) OX=226186 GN=BT_0700 PE=3 SV=1	9.44259e+06	8.25438e+06	8.19086e+06	9.13024e+06	8.78816e+06	4.59199e+06	3.91229e+06	3.71783e+06	4.78299e+06	4.84099e+06
Q8A3L0	Putative UDP-N-acetylglucosamine 2-epimerase OS=Bacteroides thetaiotaomicron (strain ATCC 29148 / DSM 2079 / NCTC 10582 / E50 / VPI-5482) OX=226186 GN=BT_2944 PE=3 SV=1	5.8326e+06	8.0139e+06	5.55853e+06	4.9526e+06	6.61303e+06	6.82929e+06	8.4996e+06	6.58914e+06	8.77801e+06	6.44184e+06
Q8A0U6	Nucleoside diphosphate kinase OS=Bacteroides thetaiotaomicron (strain ATCC 29148 / DSM 2079 / NCTC 10582 / E50 / VPI-5482) OX=226186 GN=BT_3925 PE=3 SV=1	3.94197e+07	3.44905e+07	3.33948e+07	2.6989e+07	2.82454e+07	2.86321e+07	2.57947e+07	1.93733e+07	2.91231e+07	2.86025e+07
Q8A5U2	4-alpha-glucanotransferase OS=Bacteroides thetaiotaomicron (strain ATCC 29148 / DSM 2079 / NCTC 10582 / E50 / VPI-5482) OX=226186 GN=BT_2146 PE=3 SV=1	3.72863e+06	4.4606e+06	3.34903e+06	3.57709e+06	2.76712e+06	3.75673e+06	2.07776e+06	2.23379e+06	3.22643e+06	3.18957e+06
Q8A2U2	tRNA pseudouridine synthase B OS=Bacteroides thetaiotaomicron (strain ATCC 29148 / DSM 2079 / NCTC 10582 / E50 / VPI-5482) OX=226186 GN=truB PE=3 SV=1	4.65863e+06	9.42409e+06	7.15331e+06	4.32027e+06	6.43116e+06	8.04457e+06	8.42796e+06	7.23049e+06	1.03697e+07	5.88557e+06
Q8A7U1	Putative oxidoreductase OS=Bacteroides thetaiotaomicron (strain ATCC 29148 / DSM 2079 / NCTC 10582 / E50 / VPI-5482) OX=226186 GN=BT_1433 PE=4 SV=1	2.36195e+07	2.74862e+07	1.99967e+07	1.9899e+07	2.30093e+07	3.19564e+07	2.45141e+07	2.52923e+07	3.24873e+07	2.60597e+07
Q8A9H9	Endopeptidase La OS=Bacteroides thetaiotaomicron (strain ATCC 29148 / DSM 2079 / NCTC 10582 / E50 / VPI-5482) OX=226186 GN=BT_0836 PE=3 SV=1	3.79935e+07	4.50237e+07	44327720	3.66876e+07	3.85059e+07	4.51047e+07	3.79499e+07	3.8302e+07	4.73391e+07	3.51502e+07
Q8A1H2	DUF2156 domain-containing protein OS=Bacteroides thetaiotaomicron (strain ATCC 29148 / DSM 2079 / NCTC 10582 / E50 / VPI-5482) OX=226186 GN=BT_3689 PE=1 SV=1	1.19169e+07	9.86037e+06	1.03549e+07	1.01817e+07	9.60723e+06	1.43344e+07	1.2725e+07	1.21353e+07	1.32641e+07	1.47941e+07
Q8A472	30S ribosomal protein S12 OS=Bacteroides thetaiotaomicron (strain ATCC 29148 / DSM 2079 / NCTC 10582 / E50 / VPI-5482) OX=226186 GN=rpsL PE=3 SV=1	2.7848e+08	2.40937e+08	2.56062e+08	2.25767e+08	3.8458e+08	3.54533e+08	2.44819e+08	3.79176e+08	2.98515e+08	2.51554e+08
Q8A9I0	Queuine tRNA-ribosyltransferase OS=Bacteroides thetaiotaomicron (strain ATCC 29148 / DSM 2079 / NCTC 10582 / E50 / VPI-5482) OX=226186 GN=tgt PE=3 SV=1	1.00725e+07	1.60591e+07	1.10285e+07	8.27979e+06	4.53187e+07	3.40442e+07	8.99065e+06	2.88828e+07	3.03937e+07	9.42244e+06
Q8AB50	Uncharacterized protein OS=Bacteroides thetaiotaomicron (strain ATCC 29148 / DSM 2079 / NCTC 10582 / E50 / VPI-5482) OX=226186 GN=BT_0261 PE=4 SV=1	1.0666e+08	1.1197e+08	9.06539e+07	7.68602e+07	9.78093e+07	1.08842e+08	1.1385e+08	9.58874e+07	1.12883e+08	1.00597e+08
Q8A6N2	Uncharacterized protein OS=Bacteroides thetaiotaomicron (strain ATCC 29148 / DSM 2079 / NCTC 10582 / E50 / VPI-5482) OX=226186 GN=BT_1845 PE=4 SV=1	5.63856e+06	4.57708e+06	4.25863e+06	3.60317e+06	4.61539e+06	6.49822e+06	5.17087e+06	5.14681e+06	7.05872e+06	5.94015e+06
Q8A6Z5	dTDP-4-dehydrorhamnose reductase OS=Bacteroides thetaiotaomicron (strain ATCC 29148 / DSM 2079 / NCTC 10582 / E50 / VPI-5482) OX=226186 GN=BT_1730 PE=3 SV=1	7.14651e+06	1.68701e+07	8.14593e+06	1.15782e+07	1.21957e+07	14912165	2.22971e+07	1.37934e+07	1.76528e+07	9.29525e+06
Q8A120	DNA mismatch repair protein MutL OS=Bacteroides thetaiotaomicron (strain ATCC 29148 / DSM 2079 / NCTC 10582 / E50 / VPI-5482) OX=226186 GN=mutL PE=3 SV=1	1.19843e+07	1.30629e+07	1.16317e+07	1.18815e+07	9.37832e+06	1.08411e+07	1.35801e+07	10772617	1.22344e+07	1.10644e+07
Q89YM9	1,4-dihydroxy-2-naphthoyl-CoA synthase OS=Bacteroides thetaiotaomicron (strain ATCC 29148 / DSM 2079 / NCTC 10582 / E50 / VPI-5482) OX=226186 GN=menB PE=3 SV=1	1.99731e+07	1.94217e+07	1.76455e+07	1.50181e+07	1.59732e+07	2.31847e+07	2.17978e+07	1.89627e+07	2.35215e+07	2.2613e+07
Q8A733	50S ribosomal protein L31 type B OS=Bacteroides thetaiotaomicron (strain ATCC 29148 / DSM 2079 / NCTC 10582 / E50 / VPI-5482) OX=226186 GN=rpmE2 PE=3 SV=1	5.49033e+08	5.00186e+08	5.29648e+08	4.59426e+08	4.79551e+08	645230849	6.33578e+08	6.12304e+08	5.79713e+08	7.19151e+08
Q8A8H3	Outer membrane protein, OmpA family OS=Bacteroides thetaiotaomicron (strain ATCC 29148 / DSM 2079 / NCTC 10582 / E50 / VPI-5482) OX=226186 GN=BT_1194 PE=4 SV=1	3.76163e+07	3.16793e+07	3.19712e+07	2.90535e+07	3.73128e+07	4.54681e+07	3.39238e+07	4.62069e+07	5.11821e+07	1.95762e+07
Q8A0W3	AAA_5 domain-containing protein OS=Bacteroides thetaiotaomicron (strain ATCC 29148 / DSM 2079 / NCTC 10582 / E50 / VPI-5482) OX=226186 GN=BT_3908 PE=4 SV=1	3.00599e+07	2.37772e+07	2.85432e+07	2.25647e+07	2.04055e+07	1.31582e+07	1.45389e+07	7.91043e+06	1.459e+07	1.70351e+07
Q8A251	Ribosomal RNA small subunit methyltransferase H OS=Bacteroides thetaiotaomicron (strain ATCC 29148 / DSM 2079 / NCTC 10582 / E50 / VPI-5482) OX=226186 GN=rsmH PE=3 SV=1	1.03699e+07	8.63802e+06	8.718e+06	8.80247e+06	6.94749e+06	9.48859e+06	1.02603e+07	7.70054e+06	1.21619e+07	1.25264e+07
Q8A759	Hydrolase, haloacid dehalogenase-like hydrolase OS=Bacteroides thetaiotaomicron (strain ATCC 29148 / DSM 2079 / NCTC 10582 / E50 / VPI-5482) OX=226186 GN=BT_1666 PE=1 SV=1	1.04473e+07	1.12868e+07	1.04997e+07	1.02711e+07	1.12515e+07	1.2933e+07	1.03842e+07	1.09297e+07	1.32567e+07	1.14814e+07
Q8A8L3	ATP-independent RNA helicase OS=Bacteroides thetaiotaomicron (strain ATCC 29148 / DSM 2079 / NCTC 10582 / E50 / VPI-5482) OX=226186 GN=BT_1154 PE=4 SV=1	7.39099e+06	7.78079e+06	8.63585e+06	4.94276e+06	6.74441e+06	9.23043e+06	8.32793e+06	7.74448e+06	9.02508e+06	9.76344e+06
Q89ZP4	3'-5' exonuclease-like protein OS=Bacteroides thetaiotaomicron (strain ATCC 29148 / DSM 2079 / NCTC 10582 / E50 / VPI-5482) OX=226186 GN=BT_4332 PE=4 SV=1	7.49769e+06	7.7296e+06	5.03972e+06	6.22253e+06	4.97799e+06	8.86894e+06	1.00932e+07	6.77943e+06	1.03534e+07	6.96883e+06
Q8A258	UDP-N-acetylglucosamine--N-acetylmuramyl-(pentapeptide) pyrophosphoryl-undecaprenol N-acetylglucosamine transferase OS=Bacteroides thetaiotaomicron (strain ATCC 29148 / DSM 2079 / NCTC 10582 / E50 / VPI-5482) OX=226186 GN=murG PE=3 SV=1	1.9358e+07	1.7631e+07	1.84383e+07	1.85453e+07	1.75733e+07	1.82261e+07	1.85339e+07	1.67051e+07	1.70635e+07	2.02974e+07
Q8A2J3	Glucosylceramidase OS=Bacteroides thetaiotaomicron (strain ATCC 29148 / DSM 2079 / NCTC 10582 / E50 / VPI-5482) OX=226186 GN=BT_3312 PE=1 SV=1	9.85363e+06	1.08158e+07	8.81713e+06	1.04758e+07	8.5304e+06	9.89492e+06	1.19149e+07	9.98146e+06	1.25795e+07	7.9687e+06
Q8A326	Putative flagellar motor protein MotB OS=Bacteroides thetaiotaomicron (strain ATCC 29148 / DSM 2079 / NCTC 10582 / E50 / VPI-5482) OX=226186 GN=BT_3129 PE=4 SV=1	2.74433e+07	39185217	2.43729e+07	2.03214e+07	3.25589e+07	4.12397e+07	4.47005e+07	3.96406e+07	4.75739e+07	1.99442e+07
Q8A2M0	Holliday junction ATP-dependent DNA helicase RuvB OS=Bacteroides thetaiotaomicron (strain ATCC 29148 / DSM 2079 / NCTC 10582 / E50 / VPI-5482) OX=226186 GN=ruvB PE=3 SV=1	7.14816e+06	6.69844e+06	6.24104e+06	6.64774e+06	5.777e+06	7.28386e+06	6.63885e+06	3.69288e+06	8.01655e+06	7.36893e+06
Q8A812	Coenzyme A biosynthesis bifunctional protein CoaBC OS=Bacteroides thetaiotaomicron (strain ATCC 29148 / DSM 2079 / NCTC 10582 / E50 / VPI-5482) OX=226186 GN=coaBC PE=3 SV=1	1.1133e+07	9.9254e+06	1.00331e+07	8.01816e+06	7.3554e+06	1.00939e+07	9.66583e+06	8.28446e+06	1.21738e+07	9.85223e+06
Q8A9J3	Putative metallo-beta-lactamase superfamily hydrolase OS=Bacteroides thetaiotaomicron (strain ATCC 29148 / DSM 2079 / NCTC 10582 / E50 / VPI-5482) OX=226186 GN=BT_0822 PE=4 SV=1	1.61419e+07	1.81252e+07	1.39205e+07	1.38603e+07	1.32331e+07	16037440	2.17801e+07	1.3008e+07	2.04094e+07	1.57678e+07
Q8A5S6	30S ribosomal protein S18 OS=Bacteroides thetaiotaomicron (strain ATCC 29148 / DSM 2079 / NCTC 10582 / E50 / VPI-5482) OX=226186 GN=rpsR PE=3 SV=1	3.8398e+08	3.21815e+08	3.24347e+08	3.12528e+08	2.92915e+08	3.26672e+08	3.59707e+08	3.46323e+08	3.43947e+08	3.74468e+08
Q8A1C2	OMP_b-brl_2 domain-containing protein OS=Bacteroides thetaiotaomicron (strain ATCC 29148 / DSM 2079 / NCTC 10582 / E50 / VPI-5482) OX=226186 GN=BT_3744 PE=4 SV=1	2.37719e+07	1.90641e+07	2.05633e+07	2.22518e+07	1.62822e+07	8.82438e+06	8.7286e+06	7.97159e+06	1.0494e+07	1.15349e+07
Q89ZL0	Putative outer membrane protein OS=Bacteroides thetaiotaomicron (strain ATCC 29148 / DSM 2079 / NCTC 10582 / E50 / VPI-5482) OX=226186 GN=BT_4367 PE=4 SV=1	2.09218e+07	1.95478e+07	1.91761e+07	1.96463e+07	1.87835e+07	1.43943e+07	1.32887e+07	1.61136e+07	1.65907e+07	1.23569e+07
Q8A999	50S ribosomal protein L28 OS=Bacteroides thetaiotaomicron (strain ATCC 29148 / DSM 2079 / NCTC 10582 / E50 / VPI-5482) OX=226186 GN=rpmB PE=3 SV=1	2.11647e+08	1.7295e+08	1.7475e+08	1.73912e+08	1.957e+08	2.49216e+08	1.64961e+08	201925340	1.94217e+08	1.88454e+08
Q8A9T0	Aspartate decarboxylase AsdA OS=Bacteroides thetaiotaomicron (strain ATCC 29148 / DSM 2079 / NCTC 10582 / E50 / VPI-5482) OX=226186 GN=BT_0735 PE=4 SV=1	6.53916e+06	6.13576e+06	5.57951e+06	5.18084e+06	4.7885e+06	5.59922e+06	6.47649e+06	4.98369e+06	6.00491e+06	6.47934e+06
Q8A462	Sigma-54 modulation protein OS=Bacteroides thetaiotaomicron (strain ATCC 29148 / DSM 2079 / NCTC 10582 / E50 / VPI-5482) OX=226186 GN=BT_2741 PE=4 SV=1	6.98117e+07	5.67783e+07	5.18184e+07	5.60032e+07	6.76491e+07	5.62334e+07	3.99825e+07	4.95385e+07	3.45231e+07	3.82873e+07
Q8AAN5	Indolepyruvate oxidoreductase subunit iorB OS=Bacteroides thetaiotaomicron (strain ATCC 29148 / DSM 2079 / NCTC 10582 / E50 / VPI-5482) OX=226186 GN=BT_0429 PE=4 SV=1	1.66653e+07	1.6129e+07	1.20133e+07	1.17615e+07	1.33299e+07	2.07537e+07	1.66451e+07	1.43107e+07	2.02881e+07	1.41174e+07
Q8A3X0	Peptidyl-dipeptidase OS=Bacteroides thetaiotaomicron (strain ATCC 29148 / DSM 2079 / NCTC 10582 / E50 / VPI-5482) OX=226186 GN=BT_2834 PE=3 SV=1	6.9101e+06	7.62514e+06	7.63929e+06	5.52292e+06	5.76452e+06	5.42417e+06	4.80881e+06	3.76471e+06	6.3728e+06	4.69976e+06
Q8A234	Putative hydrogenase OS=Bacteroides thetaiotaomicron (strain ATCC 29148 / DSM 2079 / NCTC 10582 / E50 / VPI-5482) OX=226186 GN=BT_3472 PE=3 SV=1	6.28009e+06	8.88594e+06	5.71095e+06	5.76455e+06	5.71402e+06	5.1609e+06	5.62613e+06	4.58419e+06	5.89249e+06	4.60045e+06
Q8AAQ4	Sporulation related OS=Bacteroides thetaiotaomicron (strain ATCC 29148 / DSM 2079 / NCTC 10582 / E50 / VPI-5482) OX=226186 GN=BT_0410 PE=4 SV=1	6.29752e+07	5.94774e+07	5.41961e+07	4.28822e+07	5.35691e+07	4.59215e+07	2.93695e+07	4.88434e+07	6.03588e+07	3.29043e+07
Q8A6J8	Putative alpha-1,6-mannanase OS=Bacteroides thetaiotaomicron (strain ATCC 29148 / DSM 2079 / NCTC 10582 / E50 / VPI-5482) OX=226186 GN=BT_1883 PE=4 SV=1	1.14388e+07	1.14229e+07	8.46225e+06	6.69333e+06	8.49071e+06	9.53573e+06	8.38049e+06	7.78845e+06	9.43056e+06	9.22105e+06
Q8A0R1	Alpha-1,2-mannosidase-like protein OS=Bacteroides thetaiotaomicron (strain ATCC 29148 / DSM 2079 / NCTC 10582 / E50 / VPI-5482) OX=226186 GN=BT_3960 PE=4 SV=1	8.12186e+06	8.50013e+06	6.68919e+06	6.12097e+06	7.06488e+06	1.92998e+07	1.65751e+07	15679409	1.73669e+07	1.53649e+07
Q8A3B9	Carboxy-terminal processing protease OS=Bacteroides thetaiotaomicron (strain ATCC 29148 / DSM 2079 / NCTC 10582 / E50 / VPI-5482) OX=226186 GN=BT_3035 PE=3 SV=1	4.876e+07	3.07738e+07	2.71357e+07	3.32629e+07	3.0773e+07	2.97886e+07	2.61641e+07	2.43438e+07	24722479	2.81095e+07
Q8A5U4	Putative oxidoreductase OS=Bacteroides thetaiotaomicron (strain ATCC 29148 / DSM 2079 / NCTC 10582 / E50 / VPI-5482) OX=226186 GN=BT_2144 PE=3 SV=1	2.77348e+07	2.68322e+07	2.16714e+07	2.03933e+07	1.96036e+07	2.49618e+07	2.07709e+07	1.84353e+07	2.69475e+07	2.64457e+07
Q8A3H9	NAD-dependent protein deacylase OS=Bacteroides thetaiotaomicron (strain ATCC 29148 / DSM 2079 / NCTC 10582 / E50 / VPI-5482) OX=226186 GN=cobB PE=3 SV=1	7.71618e+06	4.48714e+06	6.66874e+06	5.51156e+06	5.20059e+06	7.12107e+06	8.8442e+06	5.94881e+06	5.37295e+06	4.80894e+06
Q8A992	ABC transporter, ATP-binding protein OS=Bacteroides thetaiotaomicron (strain ATCC 29148 / DSM 2079 / NCTC 10582 / E50 / VPI-5482) OX=226186 GN=BT_0925 PE=4 SV=1	8.16061e+06	7.07795e+06	6.78045e+06	6.46561e+06	5.54159e+06	4.30703e+06	3.23999e+06	3.71893e+06	5.12345e+06	3.23464e+06
Q8A388	Uncharacterized protein OS=Bacteroides thetaiotaomicron (strain ATCC 29148 / DSM 2079 / NCTC 10582 / E50 / VPI-5482) OX=226186 GN=BT_3066 PE=4 SV=1	3.10033e+07	5.12544e+07	2.74973e+07	1.85273e+07	3.52744e+07	4.34688e+07	6.25447e+07	39068738	5.30123e+07	3.88737e+07
Q8A4D7	Alpha-galactosidase OS=Bacteroides thetaiotaomicron (strain ATCC 29148 / DSM 2079 / NCTC 10582 / E50 / VPI-5482) OX=226186 GN=BT_2662 PE=3 SV=1	6.33941e+06	6.35252e+06	5.63549e+06	5.58211e+06	6.75875e+06	5.41878e+06	3.20284e+06	6.06047e+06	6.9703e+06	4.13655e+06
Q8A2G8	Outer membrane protein oprM, multidrug resistance protein OS=Bacteroides thetaiotaomicron (strain ATCC 29148 / DSM 2079 / NCTC 10582 / E50 / VPI-5482) OX=226186 GN=BT_3337 PE=3 SV=1	2.96709e+06	6.94637e+06	3.49801e+06	3.55985e+06	6.08478e+06	1.17926e+06	1.23659e+06	1.18437e+06	1.70731e+06	15032.7
Q8A994	Putative periplasmic protein OS=Bacteroides thetaiotaomicron (strain ATCC 29148 / DSM 2079 / NCTC 10582 / E50 / VPI-5482) OX=226186 GN=BT_0923 PE=1 SV=1	8.49348e+07	1.04107e+08	6.50018e+07	6.15729e+07	9.03911e+07	3.71409e+07	2.65363e+07	3.47667e+07	3.88115e+07	2.52187e+07
Q8AA96	Putative acylhydrolase OS=Bacteroides thetaiotaomicron (strain ATCC 29148 / DSM 2079 / NCTC 10582 / E50 / VPI-5482) OX=226186 GN=BT_0569 PE=1 SV=1	1.29384e+07	2.50208e+07	1.83211e+07	1.82599e+07	1.73924e+07	2.56817e+07	2.73359e+07	2.01524e+07	3.07593e+07	8.03352e+06
Q8A0P7	Putative AraC-family regulatory protein OS=Bacteroides thetaiotaomicron (strain ATCC 29148 / DSM 2079 / NCTC 10582 / E50 / VPI-5482) OX=226186 GN=BT_3974 PE=4 SV=1	1.54467e+07	2.19811e+07	1.48433e+07	1.42495e+07	1.79538e+07	2.04552e+07	2.17381e+07	1.76563e+07	2.14464e+07	1.41862e+07
Q8A6B9	Multidrug efflux pump channel protein OS=Bacteroides thetaiotaomicron (strain ATCC 29148 / DSM 2079 / NCTC 10582 / E50 / VPI-5482) OX=226186 GN=BT_1965 PE=3 SV=1	3.14555e+07	6.91539e+07	8.01903e+07	8.26583e+07	6.13767e+07	62440264	66180396	63323032	77494016	2.55696e+06
Q8AAT5	UDP-glucose 6-dehydrogenase OS=Bacteroides thetaiotaomicron (strain ATCC 29148 / DSM 2079 / NCTC 10582 / E50 / VPI-5482) OX=226186 GN=BT_0379 PE=3 SV=1	1.02077e+07	9161480	9.26965e+06	8.61736e+06	8.30617e+06	1.06163e+07	9.5791e+06	7.62291e+06	1.02881e+07	9.75478e+06
Q8A2J9	Putative sugar isomerase OS=Bacteroides thetaiotaomicron (strain ATCC 29148 / DSM 2079 / NCTC 10582 / E50 / VPI-5482) OX=226186 GN=BT_3306 PE=4 SV=1	2.9903e+07	2.55227e+07	2.36035e+07	2.63773e+07	2.49277e+07	3.35508e+07	3.3522e+07	2.94158e+07	2.94217e+07	3.06654e+07
Q8AAH6	Putative gluconate aldolase OS=Bacteroides thetaiotaomicron (strain ATCC 29148 / DSM 2079 / NCTC 10582 / E50 / VPI-5482) OX=226186 GN=BT_0489 PE=3 SV=1	3.90729e+07	3.0458e+07	3.35932e+07	3.11676e+07	2.8243e+07	2.76753e+07	3.00217e+07	2.26849e+07	2.9543e+07	3.37955e+07
Q8A542	Phosphoglycerate mutase (2,3-diphosphoglycerate-independent) OS=Bacteroides thetaiotaomicron (strain ATCC 29148 / DSM 2079 / NCTC 10582 / E50 / VPI-5482) OX=226186 GN=BT_2402 PE=3 SV=1	1.27962e+07	1.4207e+07	1.02509e+07	1.05089e+07	1.04118e+07	9.59142e+06	1.47353e+07	7.7798e+06	1.34998e+07	1.22223e+07
Q8A6J9	Thiamine-monophosphate kinase OS=Bacteroides thetaiotaomicron (strain ATCC 29148 / DSM 2079 / NCTC 10582 / E50 / VPI-5482) OX=226186 GN=thiL PE=3 SV=1	6.56928e+06	6.01645e+06	7.74017e+06	4.64662e+06	6.94264e+06	1.22082e+07	8.32343e+06	1.0257e+07	1.25173e+07	8.73608e+06
Q89YV3	ATP-dependent helicase OS=Bacteroides thetaiotaomicron (strain ATCC 29148 / DSM 2079 / NCTC 10582 / E50 / VPI-5482) OX=226186 GN=BT_4628 PE=4 SV=1	7.40776e+06	6.50119e+06	5.14975e+06	5.98605e+06	5.33954e+06	5.61519e+06	5.44905e+06	4.92379e+06	6.84956e+06	5.59037e+06
Q8A809	Uncharacterized protein OS=Bacteroides thetaiotaomicron (strain ATCC 29148 / DSM 2079 / NCTC 10582 / E50 / VPI-5482) OX=226186 GN=BT_1365 PE=4 SV=1	1.62732e+08	1.47731e+08	1.42774e+08	1.23793e+08	1.12762e+08	1.25348e+08	1.5127e+08	1.14833e+08	1.33409e+08	1.78577e+08
Q8A806	UDP-N-acetylenolpyruvoylglucosamine reductase OS=Bacteroides thetaiotaomicron (strain ATCC 29148 / DSM 2079 / NCTC 10582 / E50 / VPI-5482) OX=226186 GN=murB PE=3 SV=1	1.69347e+07	1.52508e+07	1.4877e+07	1.32411e+07	1.36244e+07	1.62762e+07	1.84053e+07	1.39238e+07	1.7233e+07	1.91111e+07
Q8A148	PSP1 C-terminal domain-containing protein OS=Bacteroides thetaiotaomicron (strain ATCC 29148 / DSM 2079 / NCTC 10582 / E50 / VPI-5482) OX=226186 GN=BT_3819 PE=4 SV=1	5.65432e+06	5.46233e+06	4.82806e+06	5.71192e+06	8.11295e+06	6.75734e+06	3.86652e+06	8.47858e+06	7.64936e+06	4.30425e+06
Q89ZS2	Glycoside transferase family 4 OS=Bacteroides thetaiotaomicron (strain ATCC 29148 / DSM 2079 / NCTC 10582 / E50 / VPI-5482) OX=226186 GN=BT_4304 PE=4 SV=1	2.16942e+07	1.80823e+07	1.80938e+07	1.55434e+07	1.67393e+07	1.67847e+07	1.5331e+07	1.2902e+07	1.69806e+07	1.78284e+07
Q8AAD4	Anthranilate synthase component II OS=Bacteroides thetaiotaomicron (strain ATCC 29148 / DSM 2079 / NCTC 10582 / E50 / VPI-5482) OX=226186 GN=BT_0531 PE=4 SV=1	1.01807e+07	1.16575e+07	1.1222e+07	9.19015e+06	9.83132e+06	9.50759e+06	5.22979e+06	3.49014e+06	8.72361e+06	5.73786e+06
Q8A8U8	ParB domain-containing protein OS=Bacteroides thetaiotaomicron (strain ATCC 29148 / DSM 2079 / NCTC 10582 / E50 / VPI-5482) OX=226186 GN=BT_1069 PE=4 SV=1	1.73704e+07	1.9118e+07	1.70288e+07	1.27542e+07	1.78323e+07	2.45845e+07	1.94639e+07	2.0917e+07	2.45189e+07	1.67666e+07
Q8A637	Transcriptional regulator OS=Bacteroides thetaiotaomicron (strain ATCC 29148 / DSM 2079 / NCTC 10582 / E50 / VPI-5482) OX=226186 GN=BT_2049 PE=4 SV=1	3.22972e+07	3.1529e+07	3.01083e+07	2.67255e+07	2.51918e+07	34570413	3.80291e+07	3.04466e+07	2.91714e+07	4.55396e+07
Q8A4C4	Putative ion-channel protein, putative oxidoreductase OS=Bacteroides thetaiotaomicron (strain ATCC 29148 / DSM 2079 / NCTC 10582 / E50 / VPI-5482) OX=226186 GN=BT_2679 PE=4 SV=1	6.81362e+06	8.15114e+06	5.77504e+06	6.62574e+06	5.7149e+06	7.5633e+06	4.94668e+06	6.3725e+06	8.10265e+06	4.39098e+06
Q8A9K8	DnaK suppressor protein, putative OS=Bacteroides thetaiotaomicron (strain ATCC 29148 / DSM 2079 / NCTC 10582 / E50 / VPI-5482) OX=226186 GN=BT_0807 PE=4 SV=1	1.94505e+08	1.68439e+08	166902968	1.50341e+08	1.63326e+08	1.98476e+08	2.12562e+08	1.9316e+08	166658100	205592474
Q89Z40	Uncharacterized protein OS=Bacteroides thetaiotaomicron (strain ATCC 29148 / DSM 2079 / NCTC 10582 / E50 / VPI-5482) OX=226186 GN=BT_4537 PE=4 SV=1	8.21017e+06	8.93164e+06	7.09341e+06	8.16872e+06	7.5477e+06	8.46266e+06	7.95239e+06	7.03137e+06	9.2108e+06	7.22497e+06
Q8A2S4	4-deoxy-L-threo-5-hexosulose-uronate ketol-isomerase 1 OS=Bacteroides thetaiotaomicron (strain ATCC 29148 / DSM 2079 / NCTC 10582 / E50 / VPI-5482) OX=226186 GN=kduI1 PE=3 SV=1	1.91339e+07	1.79251e+07	16352901	1.66137e+07	1.50096e+07	1.53211e+07	1.49749e+07	1.27289e+07	1.80157e+07	1.28823e+07
Q8A017	Uncharacterized protein OS=Bacteroides thetaiotaomicron (strain ATCC 29148 / DSM 2079 / NCTC 10582 / E50 / VPI-5482) OX=226186 GN=BT_4204 PE=4 SV=1	4.03299e+07	5.7957e+07	4.62635e+07	3.84357e+07	4.45654e+07	5.04927e+07	2.56157e+07	3.35625e+07	6.52191e+07	2.82714e+07
Q8A5W8	Transporter, AcrB/D/F family OS=Bacteroides thetaiotaomicron (strain ATCC 29148 / DSM 2079 / NCTC 10582 / E50 / VPI-5482) OX=226186 GN=BT_2118 PE=4 SV=1	9.33444e+06	6.00587e+06	8.80173e+06	6.26384e+06	6.25595e+06	368979	352865	537911	55590.6	71846.7
Q8A6B3	Phosphoenolpyruvate synthase/pyruvate phosphate dikinase OS=Bacteroides thetaiotaomicron (strain ATCC 29148 / DSM 2079 / NCTC 10582 / E50 / VPI-5482) OX=226186 GN=BT_1972 PE=4 SV=1	1.71103e+07	1.50678e+07	1.57424e+07	1.58436e+07	1.34779e+07	1.66787e+07	1.38857e+07	1.40951e+07	1.91446e+07	1.67872e+07
Q8AAD2	Tryptophan synthase beta chain OS=Bacteroides thetaiotaomicron (strain ATCC 29148 / DSM 2079 / NCTC 10582 / E50 / VPI-5482) OX=226186 GN=trpB PE=3 SV=1	1.03677e+07	8424005	8.1405e+06	7.75504e+06	7.03855e+06	3.44633e+06	4.12692e+06	3.36542e+06	3.82857e+06	5.27917e+06
Q8A2G9	UDP-N-acetylglucosamine acetyltransferase OS=Bacteroides thetaiotaomicron (strain ATCC 29148 / DSM 2079 / NCTC 10582 / E50 / VPI-5482) OX=226186 GN=BT_3336 PE=4 SV=1	1.85662e+07	1.95664e+07	1.93997e+07	1.40475e+07	1.51638e+07	1.25628e+07	1.00014e+07	9.81726e+06	1.50167e+07	1.10453e+07
Q8AAA9	Carbamoyl-phosphate synthase small chain OS=Bacteroides thetaiotaomicron (strain ATCC 29148 / DSM 2079 / NCTC 10582 / E50 / VPI-5482) OX=226186 GN=carA PE=3 SV=1	6.48299e+06	9.39573e+06	4.97563e+06	6.89557e+06	6.60422e+06	1.00381e+07	9.2e+06	8.23801e+06	9.34654e+06	8.09676e+06
Q89YY2	Uncharacterized protein OS=Bacteroides thetaiotaomicron (strain ATCC 29148 / DSM 2079 / NCTC 10582 / E50 / VPI-5482) OX=226186 GN=BT_4598 PE=4 SV=1	3.96067e+06	9.97655e+06	4.09573e+06	4.93645e+06	4.84163e+06	1.01286e+07	6.68822e+06	6.82653e+06	1.21032e+07	6.08516e+06
Q8ABW3	Fido domain-containing protein OS=Bacteroides thetaiotaomicron (strain ATCC 29148 / DSM 2079 / NCTC 10582 / E50 / VPI-5482) OX=226186 GN=BT_p548235 PE=4 SV=1	1.17402e+07	15661656	1.04343e+07	1.09762e+07	1.43043e+07	1.74537e+07	1.60341e+07	1.69988e+07	19147160	1.13334e+07
Q8A7G1	Metal-dependent phosphohydrolase OS=Bacteroides thetaiotaomicron (strain ATCC 29148 / DSM 2079 / NCTC 10582 / E50 / VPI-5482) OX=226186 GN=BT_1563 PE=4 SV=1	2.93459e+07	2.1164e+07	2.20163e+07	2.34968e+07	2.27654e+07	3.00982e+07	3.06248e+07	3.21759e+07	2.45596e+07	3.96388e+07
Q8A4S9	N5-carboxyaminoimidazole ribonucleotide mutase OS=Bacteroides thetaiotaomicron (strain ATCC 29148 / DSM 2079 / NCTC 10582 / E50 / VPI-5482) OX=226186 GN=purE PE=3 SV=1	2.08902e+07	1.82399e+07	1.36091e+07	1.30248e+07	9.73533e+06	1.31374e+07	7.99013e+06	9.09066e+06	1.55012e+07	1.36145e+07
Q8A9C7	AMP nucleosidase OS=Bacteroides thetaiotaomicron (strain ATCC 29148 / DSM 2079 / NCTC 10582 / E50 / VPI-5482) OX=226186 GN=BT_0888 PE=4 SV=1	1.35538e+07	1.4508e+07	1.13379e+07	1.36802e+07	1.21718e+07	1.42091e+07	1.03627e+07	9.73461e+06	1.64846e+07	1.32211e+07
Q8A8H1	Pyruvate carboxylase subunit B OS=Bacteroides thetaiotaomicron (strain ATCC 29148 / DSM 2079 / NCTC 10582 / E50 / VPI-5482) OX=226186 GN=BT_1196 PE=4 SV=1	8.83275e+06	9.7841e+06	6.97277e+06	6.42541e+06	7.52824e+06	5.74724e+06	3.50542e+06	4.11408e+06	6.0188e+06	3.47983e+06
Q8A9I3	O-phosphoserine phosphohydrolase OS=Bacteroides thetaiotaomicron (strain ATCC 29148 / DSM 2079 / NCTC 10582 / E50 / VPI-5482) OX=226186 GN=BT_0832 PE=3 SV=1	8.74517e+06	8.96688e+06	8.83761e+06	8.57876e+06	7.9838e+06	1.28946e+07	1.07534e+07	9.58334e+06	1.31823e+07	9.49578e+06
Q8A8C4	Protein GrpE OS=Bacteroides thetaiotaomicron (strain ATCC 29148 / DSM 2079 / NCTC 10582 / E50 / VPI-5482) OX=226186 GN=grpE PE=3 SV=1	8.02794e+07	7.86616e+07	7.532e+07	7.00858e+07	6.95952e+07	6.88842e+07	7.46228e+07	6.43195e+07	7.10742e+07	5.91353e+07
Q8AA64	UDP-N-acetylglucosamine 2-epimerase OS=Bacteroides thetaiotaomicron (strain ATCC 29148 / DSM 2079 / NCTC 10582 / E50 / VPI-5482) OX=226186 GN=BT_0601 PE=3 SV=1	9.77302e+06	1.29164e+07	1.10539e+07	9.50999e+06	1.02761e+07	1.2787e+07	1.18916e+07	1.06853e+07	1.27705e+07	1.29902e+07
Q8A8K8	Na(+)-translocating NADH-quinone reductase subunit B OS=Bacteroides thetaiotaomicron (strain ATCC 29148 / DSM 2079 / NCTC 10582 / E50 / VPI-5482) OX=226186 GN=nqrB PE=3 SV=1	6.71209e+06	9.81461e+06	1.66273e+06	5.49895e+06	1.79958e+07	1.95611e+07	2.22592e+06	2.17813e+07	2.83276e+07	3.01376e+06
Q8A0Y2	Subtilisin-like serine protease OS=Bacteroides thetaiotaomicron (strain ATCC 29148 / DSM 2079 / NCTC 10582 / E50 / VPI-5482) OX=226186 GN=BT_3889 PE=3 SV=1	1.51413e+07	1.36013e+07	1.59132e+07	1.36809e+07	1.48506e+07	2.47481e+07	2.39126e+07	2.22431e+07	2.36815e+07	2.53042e+07
Q8ABW5	Putative DNA-binding protein OS=Bacteroides thetaiotaomicron (strain ATCC 29148 / DSM 2079 / NCTC 10582 / E50 / VPI-5482) OX=226186 GN=BT_p548233 PE=4 SV=1	6.57409e+06	9.18062e+06	7.40724e+06	8.09742e+06	7.98677e+06	9.76586e+06	5.96812e+06	7.00367e+06	9.0632e+06	5.09729e+06
Q8A555	O-acetylhomoserine (Thiol)-lyase OS=Bacteroides thetaiotaomicron (strain ATCC 29148 / DSM 2079 / NCTC 10582 / E50 / VPI-5482) OX=226186 GN=BT_2387 PE=3 SV=1	3.44124e+06	537648	2.40841e+06	2.32002e+06	2.38778e+06	4.41986e+06	3.2336e+06	3.34267e+06	4.3822e+06	4.11558e+06
Q8A8Y0	Concanavalin A-like lectin/glucanase OS=Bacteroides thetaiotaomicron (strain ATCC 29148 / DSM 2079 / NCTC 10582 / E50 / VPI-5482) OX=226186 GN=BT_1037 PE=4 SV=1	7.3109e+06	1.02793e+07	7.51893e+06	1.0185e+07	9.02266e+06	1.07166e+07	1.0467e+07	9.36447e+06	1.04358e+07	6.01227e+06
Q8A9X8	Hydroxylamine reductase OS=Bacteroides thetaiotaomicron (strain ATCC 29148 / DSM 2079 / NCTC 10582 / E50 / VPI-5482) OX=226186 GN=hcp PE=3 SV=1	4.02896e+06	2.86339e+06	3.37757e+06	3.70911e+06	2.00656e+06	2.76655e+06	4.39174e+06	2.81391e+06	9.61425e+06	4.36424e+06
Q8A9S2	Penicillin-insensitive transglycosylase OS=Bacteroides thetaiotaomicron (strain ATCC 29148 / DSM 2079 / NCTC 10582 / E50 / VPI-5482) OX=226186 GN=BT_0743 PE=4 SV=1	4.57873e+06	7.64739e+06	5.94121e+06	5.63916e+06	6.55434e+06	6.72745e+06	5.15633e+06	5.60727e+06	8.3925e+06	5.47435e+06
Q8A8R2	2,3-bisphosphoglycerate-dependent phosphoglycerate mutase 1 OS=Bacteroides thetaiotaomicron (strain ATCC 29148 / DSM 2079 / NCTC 10582 / E50 / VPI-5482) OX=226186 GN=gpmA1 PE=3 SV=1	1.21134e+07	1.17442e+07	1.08613e+07	1.23438e+07	1.01091e+07	1.4059e+07	1.07103e+07	1.14047e+07	1.29689e+07	1.24754e+07
Q8A6E9	Uncharacterized protein OS=Bacteroides thetaiotaomicron (strain ATCC 29148 / DSM 2079 / NCTC 10582 / E50 / VPI-5482) OX=226186 GN=BT_1935 PE=4 SV=1	4.93831e+06	4.31241e+06	4.41716e+06	3.41605e+06	2.86896e+06	3.89689e+06	3.62819e+06	3.9949e+06	5.52382e+06	4.18514e+06
Q8A246	dGTP triphosphohydrolase OS=Bacteroides thetaiotaomicron (strain ATCC 29148 / DSM 2079 / NCTC 10582 / E50 / VPI-5482) OX=226186 GN=BT_3460 PE=4 SV=1	4.79589e+06	5.31671e+06	3.6476e+06	5.89417e+06	4.87604e+06	5.63778e+06	5.61104e+06	4.31273e+06	6.16335e+06	3.61493e+06
Q8A7H1	SusD homolog OS=Bacteroides thetaiotaomicron (strain ATCC 29148 / DSM 2079 / NCTC 10582 / E50 / VPI-5482) OX=226186 GN=BT_1553 PE=3 SV=1	2.12348e+07	1.72059e+07	1.49326e+07	1.57488e+07	1.6667e+07	1.73205e+07	1.4627e+07	1.72796e+07	1.887e+07	1.37272e+07
Q8A7N4	Uncharacterized protein OS=Bacteroides thetaiotaomicron (strain ATCC 29148 / DSM 2079 / NCTC 10582 / E50 / VPI-5482) OX=226186 GN=BT_1490 PE=4 SV=1	5.4526e+06	6.17934e+06	5.24796e+06	4.90118e+06	5.80693e+06	6.38964e+06	4.54769e+06	4.67596e+06	5.92169e+06	5.98246e+06
Q89ZD2	AAA-ATPase_like domain-containing protein OS=Bacteroides thetaiotaomicron (strain ATCC 29148 / DSM 2079 / NCTC 10582 / E50 / VPI-5482) OX=226186 GN=BT_4445 PE=4 SV=1	5.43424e+06	6.37408e+06	4.06565e+06	3.84474e+06	3.7667e+06	3.65868e+06	2.85051e+06	3.04301e+06	4.62804e+06	5.40744e+06
Q8A384	Thioesterase family-like protein OS=Bacteroides thetaiotaomicron (strain ATCC 29148 / DSM 2079 / NCTC 10582 / E50 / VPI-5482) OX=226186 GN=BT_3071 PE=3 SV=1	1.13378e+07	1.17194e+07	1.14306e+07	9.54487e+06	9802508	1.23809e+07	11194494	6.01994e+06	1.25583e+07	1.30341e+07
Q8A711	Sialic acid synthase (N-acetylneuraminate synthase) OS=Bacteroides thetaiotaomicron (strain ATCC 29148 / DSM 2079 / NCTC 10582 / E50 / VPI-5482) OX=226186 GN=BT_1714 PE=4 SV=1	7.41756e+06	8.33981e+06	7.75945e+06	7.74497e+06	6.39089e+06	1.02617e+07	9.50571e+06	8.54466e+06	1.19206e+07	8.81195e+06
Q8A685	Zinc metalloprotease OS=Bacteroides thetaiotaomicron (strain ATCC 29148 / DSM 2079 / NCTC 10582 / E50 / VPI-5482) OX=226186 GN=BT_2001 PE=3 SV=1	2.21034e+07	1.82342e+07	1.70252e+07	1.6861e+07	1.84545e+07	1.47384e+07	1.28887e+07	1.62906e+07	1.8398e+07	1.32751e+07
Q8A842	Pyridoxal phosphate homeostasis protein OS=Bacteroides thetaiotaomicron (strain ATCC 29148 / DSM 2079 / NCTC 10582 / E50 / VPI-5482) OX=226186 GN=BT_1332 PE=3 SV=1	1.22346e+07	10921033	1.18415e+07	1.00044e+07	9.07545e+06	1.22021e+07	1.28468e+07	9.83421e+06	1.31016e+07	1.39243e+07
Q8A826	CDP-abequose synthase OS=Bacteroides thetaiotaomicron (strain ATCC 29148 / DSM 2079 / NCTC 10582 / E50 / VPI-5482) OX=226186 GN=BT_1348 PE=4 SV=1	9.35636e+06	8.74342e+06	7.43947e+06	7.43088e+06	7.12212e+06	1.02607e+07	6.3155e+06	6.96039e+06	1.02087e+07	5.396e+06
Q8A122	OstA-like_N domain-containing protein OS=Bacteroides thetaiotaomicron (strain ATCC 29148 / DSM 2079 / NCTC 10582 / E50 / VPI-5482) OX=226186 GN=BT_3849 PE=4 SV=1	2.45519e+07	1.5248e+07	1.96865e+07	1.97065e+07	1.16669e+07	1.39573e+07	1.59968e+07	1.26452e+07	1.33961e+07	1.43309e+07
Q89YN2	Putative hydrolase, haloacid dehalogenase-like hydrolase OS=Bacteroides thetaiotaomicron (strain ATCC 29148 / DSM 2079 / NCTC 10582 / E50 / VPI-5482) OX=226186 GN=BT_4699 PE=4 SV=1	1.66418e+07	1.67264e+07	1.69742e+07	1.32098e+07	1.53385e+07	1.88769e+07	1.54112e+07	1.54382e+07	2.26517e+07	1.90868e+07
Q8AAN1	Putative xylose repressor OS=Bacteroides thetaiotaomicron (strain ATCC 29148 / DSM 2079 / NCTC 10582 / E50 / VPI-5482) OX=226186 GN=BT_0433 PE=3 SV=1	1.06042e+07	1.05994e+07	1.11825e+07	9.70506e+06	8.01356e+06	1.25264e+07	1.55275e+07	1.22835e+07	1.33147e+07	1.44824e+07
Q8A6M5	Cysteine synthase OS=Bacteroides thetaiotaomicron (strain ATCC 29148 / DSM 2079 / NCTC 10582 / E50 / VPI-5482) OX=226186 GN=BT_1852 PE=3 SV=1	1.15112e+07	1.1643e+07	1.10912e+07	1.12538e+07	8.76941e+06	1.03693e+07	1.20676e+07	8.57635e+06	1.17188e+07	9.79981e+06
Q8A6P9	Conserved protein, with a weak D-galactarate dehydratase/altronate hydrolase domain OS=Bacteroides thetaiotaomicron (strain ATCC 29148 / DSM 2079 / NCTC 10582 / E50 / VPI-5482) OX=226186 GN=BT_1828 PE=4 SV=1	8.49248e+06	1.79726e+07	1.61851e+07	2.00368e+07	1.66373e+07	2.02899e+07	1.95028e+07	1.91363e+07	2.03712e+07	5.32432e+06
Q8ABZ7	Uncharacterized protein OS=Bacteroides thetaiotaomicron (strain ATCC 29148 / DSM 2079 / NCTC 10582 / E50 / VPI-5482) OX=226186 GN=BT_p548201 PE=4 SV=1	1.22791e+07	1.32474e+07	1.10811e+07	9.03408e+06	1.1571e+07	1.30871e+07	1.41862e+07	9.58025e+06	1.38391e+07	1.16665e+07
Q8A9K4	Putative tRNA/rRNA methyltransferase OS=Bacteroides thetaiotaomicron (strain ATCC 29148 / DSM 2079 / NCTC 10582 / E50 / VPI-5482) OX=226186 GN=BT_0811 PE=4 SV=1	3.09145e+07	2.93502e+07	3.92686e+07	2.81729e+07	2.8985e+07	4.67443e+07	5.07623e+07	4.7137e+07	4.93574e+07	3.79906e+07
Q8A196	Transcriptional regulator OS=Bacteroides thetaiotaomicron (strain ATCC 29148 / DSM 2079 / NCTC 10582 / E50 / VPI-5482) OX=226186 GN=BT_3770 PE=4 SV=1	5.35545e+06	6.47954e+06	4.82755e+06	4.70275e+06	4.96544e+06	6.73926e+06	5.96694e+06	5.31963e+06	6.6667e+06	5.5876e+06
Q8A8H5	Putative xylanase OS=Bacteroides thetaiotaomicron (strain ATCC 29148 / DSM 2079 / NCTC 10582 / E50 / VPI-5482) OX=226186 GN=BT_1192 PE=4 SV=1	1.13299e+07	9.08079e+06	1.02206e+07	9.19267e+06	8.06364e+06	1.21584e+07	1.18706e+07	1.03039e+07	1.19181e+07	1.44443e+07
Q8AA41	4-diphosphocytidyl-2-C-methyl-D-erythritol kinase OS=Bacteroides thetaiotaomicron (strain ATCC 29148 / DSM 2079 / NCTC 10582 / E50 / VPI-5482) OX=226186 GN=ispE PE=3 SV=1	7.73985e+06	5.16353e+06	6.57e+06	6.84183e+06	5.70706e+06	5.34581e+06	5.86517e+06	4.68376e+06	4.96435e+06	7.60336e+06
G8JZS9	CRP family transcriptional regulator with cAMP-binding domain OS=Bacteroides thetaiotaomicron (strain ATCC 29148 / DSM 2079 / NCTC 10582 / E50 / VPI-5482) OX=226186 GN=BT_4338 PE=4 SV=1	2.18678e+07	2.07591e+07	2.16122e+07	2.00552e+07	1.70011e+07	2.59304e+07	2.55448e+07	2.19031e+07	2.78437e+07	2.58371e+07
Q8AAA7	Mannose-1-phosphate guanylyltransferase OS=Bacteroides thetaiotaomicron (strain ATCC 29148 / DSM 2079 / NCTC 10582 / E50 / VPI-5482) OX=226186 GN=BT_0558 PE=4 SV=1	1.6294e+07	1.581e+07	1.1453e+07	9.29437e+06	1.31196e+07	1.34557e+07	1.12837e+07	1.11298e+07	1.05157e+07	1.22575e+07
Q8A8E8	Putative peroxidase family protein OS=Bacteroides thetaiotaomicron (strain ATCC 29148 / DSM 2079 / NCTC 10582 / E50 / VPI-5482) OX=226186 GN=BT_1219 PE=1 SV=1	1.38989e+07	1.34625e+07	1.16294e+07	9.59948e+06	1.08428e+07	1.86302e+07	2.08152e+07	1.65295e+07	18083745	2.0555e+07
Q89Z47	ATP-dependent DNA helicase recG OS=Bacteroides thetaiotaomicron (strain ATCC 29148 / DSM 2079 / NCTC 10582 / E50 / VPI-5482) OX=226186 GN=BT_4530 PE=4 SV=1	8.52259e+06	9.21825e+06	7.54939e+06	8.11671e+06	7.55342e+06	8.49829e+06	9.57203e+06	8.07382e+06	9.23572e+06	9.13443e+06
Q8AAW6	Ribose 5-phosphate isomerase B OS=Bacteroides thetaiotaomicron (strain ATCC 29148 / DSM 2079 / NCTC 10582 / E50 / VPI-5482) OX=226186 GN=BT_0346 PE=3 SV=1	2.89934e+07	2.56703e+07	2.4173e+07	2.27684e+07	2.0192e+07	2.51396e+07	2.19738e+07	2.14982e+07	2.43029e+07	2.54782e+07
Q8A2E0	Glycoside transferase family 2 OS=Bacteroides thetaiotaomicron (strain ATCC 29148 / DSM 2079 / NCTC 10582 / E50 / VPI-5482) OX=226186 GN=BT_3365 PE=4 SV=1	1.30364e+07	3.50758e+07	9.99777e+06	1.173e+07	3.16546e+07	4.02839e+07	1.41057e+07	3.70432e+07	3.67446e+07	9.62806e+06
Q89YZ2	Peptidyl-tRNA hydrolase OS=Bacteroides thetaiotaomicron (strain ATCC 29148 / DSM 2079 / NCTC 10582 / E50 / VPI-5482) OX=226186 GN=pth PE=3 SV=1	9.33163e+06	1.00201e+07	6.63529e+06	1.02066e+07	9.35152e+06	8.82699e+06	8.96276e+06	6.93167e+06	8.59294e+06	8.44961e+06
Q8A452	Neuramindase-like protein OS=Bacteroides thetaiotaomicron (strain ATCC 29148 / DSM 2079 / NCTC 10582 / E50 / VPI-5482) OX=226186 GN=BT_2751 PE=4 SV=1	4.8761e+06	4.57584e+06	4.24324e+06	3.76294e+06	3.42993e+06	1.00565e+07	5.87432e+06	5.18802e+06	7.51061e+06	6.401e+06
Q8A244	TPR domain protein OS=Bacteroides thetaiotaomicron (strain ATCC 29148 / DSM 2079 / NCTC 10582 / E50 / VPI-5482) OX=226186 GN=BT_3462 PE=4 SV=1	4.38909e+06	4.13634e+06	3800737	5.12316e+06	5.2994e+06	6.19017e+06	4.61798e+06	3.91154e+06	6.28032e+06	3.42874e+06
Q89Z41	DUF5655 domain-containing protein OS=Bacteroides thetaiotaomicron (strain ATCC 29148 / DSM 2079 / NCTC 10582 / E50 / VPI-5482) OX=226186 GN=BT_4536 PE=4 SV=1	9.59803e+06	1.06457e+07	5.94638e+06	8.70533e+06	9.57666e+06	1.26117e+07	1.30265e+07	9.53189e+06	1.25359e+07	1.04345e+07
Q8A6I9	Uncharacterized protein OS=Bacteroides thetaiotaomicron (strain ATCC 29148 / DSM 2079 / NCTC 10582 / E50 / VPI-5482) OX=226186 GN=BT_1895 PE=4 SV=1	2.89818e+06	2.1378e+06	2.64402e+06	2.74588e+06	2.82492e+06	1.43641e+08	1.32906e+08	1.0644e+08	1.44558e+08	1.04518e+08
Q8A0F5	NADH-quinone oxidoreductase subunit B OS=Bacteroides thetaiotaomicron (strain ATCC 29148 / DSM 2079 / NCTC 10582 / E50 / VPI-5482) OX=226186 GN=nuoB PE=3 SV=1	1.76489e+07	2.21088e+07	1.17381e+07	1.57563e+07	1.83741e+07	1.25516e+07	1.13686e+07	8.94787e+06	1.34666e+07	9.63132e+06
Q8A7M7	Single-stranded DNA-binding protein OS=Bacteroides thetaiotaomicron (strain ATCC 29148 / DSM 2079 / NCTC 10582 / E50 / VPI-5482) OX=226186 GN=ssb PE=3 SV=1	5.31212e+07	3.53265e+07	4.03408e+07	3.85655e+07	3.49981e+07	3.35041e+07	4.09136e+07	3.04841e+07	34058179	4.70491e+07
Q8AAD3	Anthranilate synthase component I OS=Bacteroides thetaiotaomicron (strain ATCC 29148 / DSM 2079 / NCTC 10582 / E50 / VPI-5482) OX=226186 GN=BT_0532 PE=3 SV=1	7.97232e+06	8.17147e+06	7.3106e+06	6.22981e+06	7.15647e+06	4.94661e+06	4.68401e+06	4.00597e+06	5.4682e+06	4.48376e+06
Q8A9A0	50S ribosomal protein L33 OS=Bacteroides thetaiotaomicron (strain ATCC 29148 / DSM 2079 / NCTC 10582 / E50 / VPI-5482) OX=226186 GN=rpmG PE=3 SV=1	1.71075e+08	1.37502e+08	1.71238e+08	1.53424e+08	161178747	1.7562e+08	1.76418e+08	1.88259e+08	1.8683e+08	1.995e+08
Q8AAD8	Tryptophan synthase alpha chain OS=Bacteroides thetaiotaomicron (strain ATCC 29148 / DSM 2079 / NCTC 10582 / E50 / VPI-5482) OX=226186 GN=trpA PE=3 SV=1	9.90501e+06	1.11905e+07	9.27879e+06	7.12708e+06	8.55736e+06	5.77508e+06	4.97258e+06	4.8413e+06	6.3641e+06	6.1762e+06
Q8A4R9	Putative Na+-dependent phosphate transporter OS=Bacteroides thetaiotaomicron (strain ATCC 29148 / DSM 2079 / NCTC 10582 / E50 / VPI-5482) OX=226186 GN=BT_2528 PE=4 SV=1	1.06096e+07	8.62715e+06	7.81889e+06	8.91261e+06	8.35125e+06	5.6986e+06	5.82103e+06	6.05268e+06	7.22631e+06	5.22404e+06
Q8A9U4	DNA repair and recombination protein, putative helicase OS=Bacteroides thetaiotaomicron (strain ATCC 29148 / DSM 2079 / NCTC 10582 / E50 / VPI-5482) OX=226186 GN=BT_0721 PE=4 SV=1	2.41344e+06	2.25852e+06	2.27484e+06	1.99027e+06	1.78137e+06	1.74249e+06	1.64921e+06	1.38391e+06	2.6662e+06	1.4873e+06
Q8A245	Deoxyuridine 5'-triphosphate nucleotidohydrolase OS=Bacteroides thetaiotaomicron (strain ATCC 29148 / DSM 2079 / NCTC 10582 / E50 / VPI-5482) OX=226186 GN=dut PE=3 SV=1	1.56267e+07	1.88509e+07	1.518e+07	1.33238e+07	1.78701e+07	18934199	1.37813e+07	1.59409e+07	2.0308e+07	1.31791e+07
Q8A0B9	Sec-independent protein translocase protein TatA OS=Bacteroides thetaiotaomicron (strain ATCC 29148 / DSM 2079 / NCTC 10582 / E50 / VPI-5482) OX=226186 GN=tatA PE=3 SV=1	1.03526e+07	1.37802e+07	7.66495e+06	8.31403e+06	1.75144e+07	1.76679e+07	7.62874e+06	2.35183e+07	1.39779e+07	6.73554e+06
Q8A2G4	Big_5 domain-containing protein OS=Bacteroides thetaiotaomicron (strain ATCC 29148 / DSM 2079 / NCTC 10582 / E50 / VPI-5482) OX=226186 GN=BT_3341 PE=4 SV=1	1.00922e+07	9.15401e+06	1.00646e+07	7.12113e+06	8.40526e+06	8.92041e+06	8.39136e+06	7.4181e+06	1.05949e+07	8.86077e+06
Q89ZK5	Probable dual-specificity RNA methyltransferase RlmN OS=Bacteroides thetaiotaomicron (strain ATCC 29148 / DSM 2079 / NCTC 10582 / E50 / VPI-5482) OX=226186 GN=rlmN PE=3 SV=1	5.47991e+06	8.0832e+06	6.14002e+06	5.26531e+06	6.96764e+06	8.17564e+06	5.42119e+06	6.94241e+06	9.33432e+06	6.48689e+06
Q8A6R4	Putative chaperone DnAJ OS=Bacteroides thetaiotaomicron (strain ATCC 29148 / DSM 2079 / NCTC 10582 / E50 / VPI-5482) OX=226186 GN=BT_1812 PE=4 SV=1	1.20232e+07	1.59148e+07	1.06583e+07	1.02037e+07	1.25729e+07	1.32703e+07	1.69339e+07	1.11098e+07	1.40152e+07	1.15224e+07
Q8A4S6	RNA polymerase sigma-54 OS=Bacteroides thetaiotaomicron (strain ATCC 29148 / DSM 2079 / NCTC 10582 / E50 / VPI-5482) OX=226186 GN=BT_2521 PE=3 SV=1	8.55156e+06	7.81087e+06	8.57858e+06	5.75697e+06	7.03521e+06	8.10168e+06	9.00231e+06	7.18879e+06	9.56786e+06	1.00119e+07
Q8A9P6	Uncharacterized protein OS=Bacteroides thetaiotaomicron (strain ATCC 29148 / DSM 2079 / NCTC 10582 / E50 / VPI-5482) OX=226186 GN=BT_0769 PE=4 SV=1	1.91274e+07	2.11098e+07	2.04751e+07	2.14841e+07	2.17989e+07	2.30034e+07	1.82216e+07	1.78356e+07	2.52116e+07	2.06405e+07
Q89Z59	Probable type I restriction enzyme BthVORF4518P M protein OS=Bacteroides thetaiotaomicron (strain ATCC 29148 / DSM 2079 / NCTC 10582 / E50 / VPI-5482) OX=226186 GN=BT_4518 PE=1 SV=1	4.6259e+06	4.7991e+06	4.828e+06	5.04175e+06	4.91777e+06	6.54323e+06	5.2562e+06	5.17287e+06	7.08484e+06	5.1592e+06
Q8A8J6	Glyoxalase family-like protein OS=Bacteroides thetaiotaomicron (strain ATCC 29148 / DSM 2079 / NCTC 10582 / E50 / VPI-5482) OX=226186 GN=BT_1171 PE=4 SV=1	4.50678e+06	9.97939e+06	8.22706e+06	5.09053e+06	6.28227e+06	2.05915e+06	1.38162e+06	927581	2.64823e+06	2.01405e+06
Q8A814	tRNA/rRNA methyltransferase OS=Bacteroides thetaiotaomicron (strain ATCC 29148 / DSM 2079 / NCTC 10582 / E50 / VPI-5482) OX=226186 GN=BT_1360 PE=4 SV=1	1.73004e+07	2.02568e+07	1.98574e+07	2.05758e+07	1.81575e+07	3.01283e+07	3.96969e+07	2.80308e+07	3.24244e+07	2.96802e+07
Q89YH7	Putative two-component system sensor histidine kinase, putative heat shock protein OS=Bacteroides thetaiotaomicron (strain ATCC 29148 / DSM 2079 / NCTC 10582 / E50 / VPI-5482) OX=226186 GN=BT_4755 PE=4 SV=1	1.10703e+07	9.28411e+06	8.90062e+06	7.5491e+06	5.95669e+06	7.02842e+06	7.26039e+06	5.47755e+06	9.18799e+06	7.04862e+06
Q8AA19	OMP_b-brl_2 domain-containing protein OS=Bacteroides thetaiotaomicron (strain ATCC 29148 / DSM 2079 / NCTC 10582 / E50 / VPI-5482) OX=226186 GN=BT_0646 PE=4 SV=1	1.59793e+07	9.98822e+06	1.21237e+07	1.0822e+07	9.98957e+06	6.22231e+06	6.23155e+06	7.5372e+06	7.63333e+06	7.30336e+06
Q8A0P8	S-adenosylmethionine:tRNA ribosyltransferase-isomerase OS=Bacteroides thetaiotaomicron (strain ATCC 29148 / DSM 2079 / NCTC 10582 / E50 / VPI-5482) OX=226186 GN=queA PE=3 SV=1	8.33991e+06	8.55745e+06	8.19605e+06	7.02773e+06	6.96618e+06	9.81992e+06	9.86863e+06	7.5977e+06	9.89439e+06	9.48098e+06
Q89Z42	Type I restriction enzyme R Protein OS=Bacteroides thetaiotaomicron (strain ATCC 29148 / DSM 2079 / NCTC 10582 / E50 / VPI-5482) OX=226186 GN=BT_4535 PE=3 SV=1	1.03169e+07	9.5299e+06	8.87972e+06	8.49988e+06	8.72714e+06	9.26828e+06	9.36148e+06	8.63224e+06	9.62858e+06	9.50972e+06
Q8AA35	Exodeoxyribonuclease III OS=Bacteroides thetaiotaomicron (strain ATCC 29148 / DSM 2079 / NCTC 10582 / E50 / VPI-5482) OX=226186 GN=BT_0630 PE=3 SV=1	6.70985e+06	6.70201e+06	5.44787e+06	4.06933e+06	5.48975e+06	9.78856e+06	7.43099e+06	8.76114e+06	1.01838e+07	8.97901e+06
Q8A2K0	Fructokinase OS=Bacteroides thetaiotaomicron (strain ATCC 29148 / DSM 2079 / NCTC 10582 / E50 / VPI-5482) OX=226186 GN=BT_3305 PE=4 SV=1	6.05496e+06	8.91055e+06	5.04077e+06	6.04913e+06	6.69029e+06	1.19627e+07	7.67181e+06	7.06498e+06	1.15799e+07	6.62868e+06
Q8A669	Glucose-1-phosphate thymidylyltransferase OS=Bacteroides thetaiotaomicron (strain ATCC 29148 / DSM 2079 / NCTC 10582 / E50 / VPI-5482) OX=226186 GN=BT_2017 PE=3 SV=1	1.177e+07	1.10026e+07	1.07408e+07	1.00326e+07	8.60477e+06	1.38891e+07	13419368	1.01608e+07	1.42171e+07	1.55973e+07
Q8A8M2	Ribosomal RNA small subunit methyltransferase G OS=Bacteroides thetaiotaomicron (strain ATCC 29148 / DSM 2079 / NCTC 10582 / E50 / VPI-5482) OX=226186 GN=rsmG PE=3 SV=1	1.67919e+07	1.78642e+07	1.82232e+07	1.13126e+07	1.51185e+07	1.87473e+07	1.47514e+07	1.17652e+07	1.99163e+07	1.51088e+07
Q8A627	Protein TonB OS=Bacteroides thetaiotaomicron (strain ATCC 29148 / DSM 2079 / NCTC 10582 / E50 / VPI-5482) OX=226186 GN=BT_2059 PE=3 SV=1	6.95052e+07	5.17824e+07	5.07835e+07	5.61845e+07	7.54144e+07	7.1023e+07	4.45134e+07	7.42949e+07	6.26625e+07	5.05512e+07
Q8A874	Uncharacterized protein OS=Bacteroides thetaiotaomicron (strain ATCC 29148 / DSM 2079 / NCTC 10582 / E50 / VPI-5482) OX=226186 GN=BT_1300 PE=4 SV=1	2.01024e+07	2.20349e+07	2.20495e+07	1.39137e+07	1.84423e+07	1.28345e+07	8.27714e+06	1.05339e+07	1.36074e+07	1.09101e+07
Q8A9S0	3-deoxy-manno-octulosonate cytidylyltransferase OS=Bacteroides thetaiotaomicron (strain ATCC 29148 / DSM 2079 / NCTC 10582 / E50 / VPI-5482) OX=226186 GN=kdsB PE=3 SV=1	1.15376e+07	1.99733e+07	1.06063e+07	8.73915e+06	1.53292e+07	1.52072e+07	1.02468e+07	1.38972e+07	1.69444e+07	1.28852e+07
Q8A9A1	Signal recognition particle receptor FtsY OS=Bacteroides thetaiotaomicron (strain ATCC 29148 / DSM 2079 / NCTC 10582 / E50 / VPI-5482) OX=226186 GN=ftsY PE=3 SV=1	1.40757e+07	1.58956e+07	1.52762e+07	8.50769e+06	1.0155e+07	1.484e+07	9.35168e+06	7.40257e+06	1.27587e+07	8.39298e+06
Q8A4N3	HIT family protein OS=Bacteroides thetaiotaomicron (strain ATCC 29148 / DSM 2079 / NCTC 10582 / E50 / VPI-5482) OX=226186 GN=BT_2566 PE=4 SV=1	3.91707e+07	3.36096e+07	3.03856e+07	3.14065e+07	3.53681e+07	3.59766e+07	2.86687e+07	2.85924e+07	3.496e+07	3.59928e+07
Q8A2R6	SusC homolog OS=Bacteroides thetaiotaomicron (strain ATCC 29148 / DSM 2079 / NCTC 10582 / E50 / VPI-5482) OX=226186 GN=BT_3239 PE=3 SV=1	940252	704468	1.04623e+06	705090	923339	2.58747e+06	2.25225e+06	2.46052e+06	3.39236e+06	2.59776e+06
Q8A327	dITP/XTP pyrophosphatase OS=Bacteroides thetaiotaomicron (strain ATCC 29148 / DSM 2079 / NCTC 10582 / E50 / VPI-5482) OX=226186 GN=BT_3128 PE=3 SV=1	2.22889e+06	3.88994e+06	4.25854e+06	4.31447e+06	4.68822e+06	7.31119e+06	5.24868e+06	7.35065e+06	8.55683e+06	3.69796e+06
Q8A7T1	8-amino-7-oxononanoate synthase OS=Bacteroides thetaiotaomicron (strain ATCC 29148 / DSM 2079 / NCTC 10582 / E50 / VPI-5482) OX=226186 GN=BT_1443 PE=4 SV=1	4.65337e+06	4.05735e+06	3.85531e+06	5.25442e+06	4.1034e+06	1.25429e+06	1.31695e+06	1.164e+06	1.92871e+06	2.32645e+06
Q8A508	Beta-N-acetylglucosaminidase OS=Bacteroides thetaiotaomicron (strain ATCC 29148 / DSM 2079 / NCTC 10582 / E50 / VPI-5482) OX=226186 GN=BT_2439 PE=3 SV=1	3.30099e+06	3.58867e+06	3.24142e+06	2.37726e+06	2.29966e+06	3.94823e+06	2.65594e+06	3.41665e+06	3.36191e+06	4.90553e+06
Q8A6N9	Putative alanyl dipeptidyl peptidase OS=Bacteroides thetaiotaomicron (strain ATCC 29148 / DSM 2079 / NCTC 10582 / E50 / VPI-5482) OX=226186 GN=BT_1838 PE=4 SV=1	5.75697e+06	4.69301e+06	5.1977e+06	4.28511e+06	7.34432e+06	1.39959e+07	9.36826e+06	1.37165e+07	1.02305e+07	1.03064e+07
Q8A9B2	BatE, TRP domain containing protein OS=Bacteroides thetaiotaomicron (strain ATCC 29148 / DSM 2079 / NCTC 10582 / E50 / VPI-5482) OX=226186 GN=BT_0903 PE=4 SV=1	1.19864e+07	1.1527e+07	1.24295e+07	1.18283e+07	1.26041e+07	8.27269e+06	6.63321e+06	7881406	1.05828e+07	9.56059e+06
Q8A0Y6	Putative phosphohydrolase, Icc family OS=Bacteroides thetaiotaomicron (strain ATCC 29148 / DSM 2079 / NCTC 10582 / E50 / VPI-5482) OX=226186 GN=BT_3885 PE=4 SV=1	11620761	8200587	1.32947e+07	8.32039e+06	7.96774e+06	1.10668e+07	1.04444e+07	1.06265e+07	1.11874e+07	1.24959e+07
Q8A6G8	Putative methylmalonyl-CoA decarboxylase biotin OS=Bacteroides thetaiotaomicron (strain ATCC 29148 / DSM 2079 / NCTC 10582 / E50 / VPI-5482) OX=226186 GN=BT_1916 PE=4 SV=1	58167984	8.73889e+07	5.2378e+07	5.414e+07	7.3145e+07	8.05437e+07	6.12161e+07	8.36568e+07	6.52793e+07	5.66558e+07
Q8A484	50S ribosomal protein L29 OS=Bacteroides thetaiotaomicron (strain ATCC 29148 / DSM 2079 / NCTC 10582 / E50 / VPI-5482) OX=226186 GN=rpmC PE=3 SV=1	1.27242e+08	1.39822e+08	1.78067e+08	1.12691e+08	1.22502e+08	1.69877e+08	2.01823e+08	1.80142e+08	1.79851e+08	9.99826e+07
Q8ABA7	Histidine biosynthesis bifunctional protein HisB OS=Bacteroides thetaiotaomicron (strain ATCC 29148 / DSM 2079 / NCTC 10582 / E50 / VPI-5482) OX=226186 GN=hisB PE=1 SV=1	6.79838e+06	6.54929e+06	5.87233e+06	5.41846e+06	5.53814e+06	6.78181e+06	6.49836e+06	5.73836e+06	7.27314e+06	8.06078e+06
Q8ABA9	Histidinol dehydrogenase OS=Bacteroides thetaiotaomicron (strain ATCC 29148 / DSM 2079 / NCTC 10582 / E50 / VPI-5482) OX=226186 GN=hisD PE=3 SV=1	9.51681e+06	1.05022e+07	7.48812e+06	7.57423e+06	7.47009e+06	1.1064e+07	1.16436e+07	9.04315e+06	11592531	1.26889e+07
Q89YY8	Uncharacterized protein OS=Bacteroides thetaiotaomicron (strain ATCC 29148 / DSM 2079 / NCTC 10582 / E50 / VPI-5482) OX=226186 GN=BT_4592 PE=3 SV=1	3.77373e+07	2.69026e+07	2.88841e+07	2.73546e+07	2.73408e+07	2.54186e+07	2.17672e+07	2.4502e+07	2.88956e+07	2.76065e+07
Q8A828	Capsule biosynthesis protein capA OS=Bacteroides thetaiotaomicron (strain ATCC 29148 / DSM 2079 / NCTC 10582 / E50 / VPI-5482) OX=226186 GN=BT_1346 PE=3 SV=1	9.12414e+06	8.27378e+06	7.95285e+06	8.00237e+06	7.90663e+06	8.5104e+06	7.16208e+06	7.66834e+06	9.02845e+06	8.43822e+06
Q8ABF6	Putative periplasmic protease OS=Bacteroides thetaiotaomicron (strain ATCC 29148 / DSM 2079 / NCTC 10582 / E50 / VPI-5482) OX=226186 GN=BT_0154 PE=4 SV=1	6.20321e+06	5.40723e+06	6.68219e+06	3.81147e+06	5.4427e+06	5.13382e+06	3.86767e+06	2.37257e+06	5.89716e+06	3.45928e+06
Q8A132	ABC transporter ATP-binding protein OS=Bacteroides thetaiotaomicron (strain ATCC 29148 / DSM 2079 / NCTC 10582 / E50 / VPI-5482) OX=226186 GN=BT_3839 PE=4 SV=1	4.36341e+06	4.53348e+06	4.37912e+06	3.59043e+06	3.27928e+06	5.53496e+06	5.22598e+06	3.99273e+06	5.18021e+06	5.21948e+06
Q8A4Q0	Fe-S metabolism associated SufE OS=Bacteroides thetaiotaomicron (strain ATCC 29148 / DSM 2079 / NCTC 10582 / E50 / VPI-5482) OX=226186 GN=BT_2547 PE=3 SV=1	1.37072e+07	1.32648e+07	1.50506e+07	1.09563e+07	1.04299e+07	1.35877e+07	1.26632e+07	9.27577e+06	1.39479e+07	1.27084e+07
E7MCA7	30S ribosomal protein S21 OS=Bacteroides thetaiotaomicron (strain ATCC 29148 / DSM 2079 / NCTC 10582 / E50 / VPI-5482) OX=226186 GN=rpsU PE=3 SV=1	167217669	1.49271e+08	1.45884e+08	1.33038e+08	225421128	2.89344e+08	1.91709e+08	2.84895e+08	3.02099e+08	2.00925e+08
Q8AA08	DNA helicase OS=Bacteroides thetaiotaomicron (strain ATCC 29148 / DSM 2079 / NCTC 10582 / E50 / VPI-5482) OX=226186 GN=BT_0657 PE=3 SV=1	5.11568e+06	4.96198e+06	4.37767e+06	4.13381e+06	4.9309e+06	4.0841e+06	3.30096e+06	2.37352e+06	4.2503e+06	2.43658e+06
Q89ZC6	Putative MTA/SAH nucleosidase OS=Bacteroides thetaiotaomicron (strain ATCC 29148 / DSM 2079 / NCTC 10582 / E50 / VPI-5482) OX=226186 GN=BT_4451 PE=4 SV=1	2.05071e+07	1.66328e+07	2.01554e+07	1.79665e+07	1.45299e+07	1.76975e+07	18804566	1.36943e+07	1.70579e+07	1.50827e+07
Q8A4B4	Putative TetR transcriptional regulator OS=Bacteroides thetaiotaomicron (strain ATCC 29148 / DSM 2079 / NCTC 10582 / E50 / VPI-5482) OX=226186 GN=BT_2689 PE=4 SV=1	1.69191e+07	1.6306e+07	1.48412e+07	1.15963e+07	1.15825e+07	1.06318e+07	1.06287e+07	7.34436e+06	1.08042e+07	1.34235e+07
Q8A494	50S ribosomal protein L30 OS=Bacteroides thetaiotaomicron (strain ATCC 29148 / DSM 2079 / NCTC 10582 / E50 / VPI-5482) OX=226186 GN=rpmD PE=3 SV=1	1.13296e+08	1.51603e+08	1.35644e+08	1.13066e+08	129880322	2.89025e+08	3.46333e+08	2.23076e+08	2.70836e+08	2.62791e+08
Q8A0H8	Ribosomal RNA small subunit methyltransferase A OS=Bacteroides thetaiotaomicron (strain ATCC 29148 / DSM 2079 / NCTC 10582 / E50 / VPI-5482) OX=226186 GN=rsmA PE=3 SV=1	1.93984e+06	4.24228e+06	2.32978e+06	2.8642e+06	2.90633e+06	4.38933e+06	2.88223e+06	4.8085e+06	5.56837e+06	5.29531e+06
Q8A8G4	Putative UDP-N-acetylglucosamine 2-epimerase OS=Bacteroides thetaiotaomicron (strain ATCC 29148 / DSM 2079 / NCTC 10582 / E50 / VPI-5482) OX=226186 GN=BT_1203 PE=3 SV=1	7.30749e+06	8.77864e+06	7.68438e+06	6.99803e+06	6.869e+06	7.80499e+06	8.47105e+06	7.1419e+06	8.19958e+06	8.55596e+06
Q8A7E8	Putative Pirin family protein OS=Bacteroides thetaiotaomicron (strain ATCC 29148 / DSM 2079 / NCTC 10582 / E50 / VPI-5482) OX=226186 GN=BT_1576 PE=3 SV=1	6.17764e+06	4.20319e+06	6.73596e+06	4.7832e+06	3.58049e+06	5.02479e+06	6.87886e+06	3.91524e+06	5.68626e+06	8.80929e+06
Q8A7I0	NAD(+) diphosphatase OS=Bacteroides thetaiotaomicron (strain ATCC 29148 / DSM 2079 / NCTC 10582 / E50 / VPI-5482) OX=226186 GN=BT_1544 PE=4 SV=1	6.5076e+06	5.49082e+06	7.19869e+06	5.89523e+06	4.04375e+06	5.89293e+06	5.54399e+06	5.22341e+06	5.81015e+06	7.09265e+06
Q89ZI7	B3_4 domain-containing protein OS=Bacteroides thetaiotaomicron (strain ATCC 29148 / DSM 2079 / NCTC 10582 / E50 / VPI-5482) OX=226186 GN=BT_4390 PE=4 SV=1	1.88759e+07	1.81281e+07	1.96062e+07	1.60853e+07	1.66809e+07	1.80646e+07	2.20004e+07	1.5936e+07	1.90833e+07	1.99939e+07
Q8A9N1	Putative RNA-binding protein OS=Bacteroides thetaiotaomicron (strain ATCC 29148 / DSM 2079 / NCTC 10582 / E50 / VPI-5482) OX=226186 GN=BT_0784 PE=4 SV=1	6.98097e+07	6.15387e+07	6.30005e+07	4.71364e+07	4.39672e+07	1.97121e+07	2.71995e+07	1.08082e+07	1.64757e+07	1.17818e+07
Q89Z89	DNA-(apurinic or apyrimidinic site) lyase OS=Bacteroides thetaiotaomicron (strain ATCC 29148 / DSM 2079 / NCTC 10582 / E50 / VPI-5482) OX=226186 GN=BT_4488 PE=3 SV=1	6.91917e+06	5.78979e+06	5.34506e+06	5.47631e+06	5.06029e+06	6.56244e+06	7.54072e+06	5.72492e+06	8.21891e+06	6.22598e+06
Q8A147	Putative DNA polymerase III, delta subunit OS=Bacteroides thetaiotaomicron (strain ATCC 29148 / DSM 2079 / NCTC 10582 / E50 / VPI-5482) OX=226186 GN=BT_3820 PE=4 SV=1	2.2991e+06	5.27732e+06	4.09393e+06	2.51083e+06	3.95883e+06	6.90601e+06	6.09216e+06	6.08205e+06	7.6226e+06	3.37189e+06
Q8A4M9	Glutamate decarboxylase OS=Bacteroides thetaiotaomicron (strain ATCC 29148 / DSM 2079 / NCTC 10582 / E50 / VPI-5482) OX=226186 GN=BT_2570 PE=3 SV=1	1.01287e+07	1.02544e+07	9.58828e+06	8.9777e+06	1.19228e+07	1.32121e+07	8.97554e+06	1.02453e+07	9.19591e+06	7.89845e+06
Q8A877	V-type ATP synthase subunit D OS=Bacteroides thetaiotaomicron (strain ATCC 29148 / DSM 2079 / NCTC 10582 / E50 / VPI-5482) OX=226186 GN=BT_1297 PE=3 SV=1	1.50675e+07	1.74441e+07	1.29963e+07	1.17901e+07	1.26261e+07	1.08012e+07	8.06408e+06	5.9075e+06	1.25262e+07	1.09549e+07
Q8A8T3	DUF4923 domain-containing protein OS=Bacteroides thetaiotaomicron (strain ATCC 29148 / DSM 2079 / NCTC 10582 / E50 / VPI-5482) OX=226186 GN=BT_1084 PE=4 SV=1	1.08698e+07	1.00695e+07	6.01248e+06	5.42668e+06	1.0013e+07	1.41574e+07	5.78839e+06	1.09624e+07	7.21538e+06	8.05353e+06
Q8A9P1	Conserved protein with a conserved patatin-like phospholipase domain OS=Bacteroides thetaiotaomicron (strain ATCC 29148 / DSM 2079 / NCTC 10582 / E50 / VPI-5482) OX=226186 GN=BT_0774 PE=4 SV=1	3.48071e+06	4.4662e+06	3.43741e+06	3.68527e+06	3.39326e+06	3.28877e+06	2.68802e+06	2.44571e+06	4.15024e+06	2.90171e+06
Q8A2R9	Uncharacterized protein OS=Bacteroides thetaiotaomicron (strain ATCC 29148 / DSM 2079 / NCTC 10582 / E50 / VPI-5482) OX=226186 GN=BT_3236 PE=4 SV=1	1.00891e+07	7.71816e+06	8.15552e+06	7.2165e+06	5.98216e+06	1.05934e+07	1.40977e+07	9.94933e+06	1.21035e+07	1.46039e+07
Q8A8K9	Na(+)-translocating NADH-quinone reductase subunit C OS=Bacteroides thetaiotaomicron (strain ATCC 29148 / DSM 2079 / NCTC 10582 / E50 / VPI-5482) OX=226186 GN=nqrC PE=3 SV=1	7.61644e+07	6.10196e+07	5.94883e+07	6.0249e+07	6.67132e+07	5.77908e+07	5.37508e+07	6.47103e+07	6.70131e+07	5.72886e+07
E7MCB0	Conserved hypothetical membrane protein OS=Bacteroides thetaiotaomicron (strain ATCC 29148 / DSM 2079 / NCTC 10582 / E50 / VPI-5482) OX=226186 GN=BT_3901a PE=4 SV=1	5.14109e+07	4.0388e+07	4.30326e+07	4.05272e+07	4.26868e+07	1.6691e+07	1.39202e+07	1.80937e+07	1.99485e+07	1.59343e+07
Q8A001	Flotillin-like protein OS=Bacteroides thetaiotaomicron (strain ATCC 29148 / DSM 2079 / NCTC 10582 / E50 / VPI-5482) OX=226186 GN=BT_4220 PE=4 SV=1	7.49546e+06	6.98497e+06	8.02059e+06	5.98997e+06	6.93791e+06	7.21278e+06	5.92651e+06	8.87957e+06	9.75935e+06	6.64745e+06
Q8A7P6	Histidinol-phosphatase OS=Bacteroides thetaiotaomicron (strain ATCC 29148 / DSM 2079 / NCTC 10582 / E50 / VPI-5482) OX=226186 GN=BT_1478 PE=3 SV=1	7.82777e+06	7.51433e+06	5.46685e+06	5.40542e+06	6.05514e+06	8.38915e+06	9.1074e+06	9.5109e+06	9.79374e+06	8.87228e+06
Q8A7F8	7-cyano-7-deazaguanine synthase OS=Bacteroides thetaiotaomicron (strain ATCC 29148 / DSM 2079 / NCTC 10582 / E50 / VPI-5482) OX=226186 GN=queC PE=3 SV=2	1.58548e+07	1.25337e+07	1.49856e+07	1.29988e+07	1.15834e+07	14535737	1.38928e+07	11497690	1.69881e+07	1.92594e+07
Q8A2A3	Ribosome maturation factor RimP OS=Bacteroides thetaiotaomicron (strain ATCC 29148 / DSM 2079 / NCTC 10582 / E50 / VPI-5482) OX=226186 GN=rimP PE=3 SV=1	1.68803e+07	1.99689e+07	1.7807e+07	1.08146e+07	1.53154e+07	1.72739e+07	2.01694e+07	1.94116e+07	1.97852e+07	1.55623e+07
Q8A0Y7	2-C-methyl-D-erythritol 2,4-cyclodiphosphate synthase OS=Bacteroides thetaiotaomicron (strain ATCC 29148 / DSM 2079 / NCTC 10582 / E50 / VPI-5482) OX=226186 GN=ispF PE=3 SV=1	8.91912e+06	7.75376e+06	8.11633e+06	6.80303e+06	5.80712e+06	7.01863e+06	6.17077e+06	5.45521e+06	7.22224e+06	9.21317e+06
Q8A6W2	Aldose 1-epimerase family protein OS=Bacteroides thetaiotaomicron (strain ATCC 29148 / DSM 2079 / NCTC 10582 / E50 / VPI-5482) OX=226186 GN=BT_1764 PE=4 SV=1	6.59989e+06	6.21542e+06	6.42171e+06	6.24752e+06	4.91298e+06	8.31325e+06	6.5008e+06	5.65779e+06	7.53295e+06	9.13935e+06
Q8AAN9	50S ribosomal protein L20 OS=Bacteroides thetaiotaomicron (strain ATCC 29148 / DSM 2079 / NCTC 10582 / E50 / VPI-5482) OX=226186 GN=rplT PE=3 SV=1	1.7695e+08	1.75758e+08	1.32464e+08	1.2982e+08	2.88826e+08	2.92345e+08	1.51526e+08	3.20889e+08	253923797	1.42887e+08
Q8A1B0	Transcriptional regulator OS=Bacteroides thetaiotaomicron (strain ATCC 29148 / DSM 2079 / NCTC 10582 / E50 / VPI-5482) OX=226186 GN=BT_3756 PE=4 SV=1	2.04874e+07	1.9619e+07	1.91664e+07	1.66328e+07	1.62564e+07	2.5111e+07	2.73397e+07	2.27353e+07	2.44278e+07	2.63061e+07
Q8A5V9	Putative beta-phosphoglucomutase OS=Bacteroides thetaiotaomicron (strain ATCC 29148 / DSM 2079 / NCTC 10582 / E50 / VPI-5482) OX=226186 GN=BT_2127 PE=1 SV=1	9.75348e+06	9.97877e+06	8.33422e+06	8.80604e+06	7.99351e+06	1.17767e+07	1.1485e+07	1.18698e+07	1.57956e+07	1.50778e+07
Q8A0S9	Thioesterase superfamily protein OS=Bacteroides thetaiotaomicron (strain ATCC 29148 / DSM 2079 / NCTC 10582 / E50 / VPI-5482) OX=226186 GN=BT_3942 PE=4 SV=1	1.4584e+07	1.13579e+07	1.1734e+07	1.19002e+07	1.06768e+07	1.02252e+07	7.66565e+06	8.79456e+06	9.83136e+06	1.1436e+07
Q8A2R3	Uncharacterized protein OS=Bacteroides thetaiotaomicron (strain ATCC 29148 / DSM 2079 / NCTC 10582 / E50 / VPI-5482) OX=226186 GN=BT_3242 PE=4 SV=1	3.06043e+06	3.00637e+06	2.60162e+06	2.39375e+06	2.1351e+06	5.89667e+06	6.41848e+06	4.63593e+06	6.04922e+06	5.7752e+06
Q8A8R5	ATP-dependent 6-phosphofructokinase 1 OS=Bacteroides thetaiotaomicron (strain ATCC 29148 / DSM 2079 / NCTC 10582 / E50 / VPI-5482) OX=226186 GN=pfkA1 PE=3 SV=1	1.01624e+07	1.00188e+07	9.14106e+06	7986348	8.61491e+06	1.12592e+07	1.1444e+07	9.76602e+06	1.16007e+07	1.06556e+07
Q8A2N0	Uncharacterized protein OS=Bacteroides thetaiotaomicron (strain ATCC 29148 / DSM 2079 / NCTC 10582 / E50 / VPI-5482) OX=226186 GN=BT_3275 PE=4 SV=1	2.42026e+06	1.95776e+06	1.2787e+06	1.26905e+06	2.46622e+06	2.4003e+06	1.45314e+06	1.92316e+06	2.49928e+06	802574
Q8A5V6	Uracil-DNA glycosylase OS=Bacteroides thetaiotaomicron (strain ATCC 29148 / DSM 2079 / NCTC 10582 / E50 / VPI-5482) OX=226186 GN=ung PE=3 SV=1	1.28445e+07	1.12078e+07	1.03362e+07	1.08964e+07	1.07513e+07	1.35897e+07	1.31688e+07	1.10566e+07	1.30938e+07	1.16827e+07
Q8AB55	Uncharacterized protein OS=Bacteroides thetaiotaomicron (strain ATCC 29148 / DSM 2079 / NCTC 10582 / E50 / VPI-5482) OX=226186 GN=BT_0256 PE=4 SV=1	4.16446e+07	4.01507e+07	4.1022e+07	3.91163e+07	3.48476e+07	2.81217e+07	3.14825e+07	2.76111e+07	3.01733e+07	3.10445e+07
Q8A009	Putative LemA protein OS=Bacteroides thetaiotaomicron (strain ATCC 29148 / DSM 2079 / NCTC 10582 / E50 / VPI-5482) OX=226186 GN=BT_4212 PE=3 SV=1	1.74083e+07	1.43702e+07	1.35393e+07	1.39157e+07	14727399	7.1122e+06	5.71229e+06	7.71934e+06	7.69327e+06	6.8477e+06
Q8AAZ1	Cytidine/deoxycytidylate deaminase OS=Bacteroides thetaiotaomicron (strain ATCC 29148 / DSM 2079 / NCTC 10582 / E50 / VPI-5482) OX=226186 GN=BT_0321 PE=4 SV=1	6.03039e+06	6.14722e+06	8.1829e+06	6.19699e+06	4.7783e+06	5.67985e+06	4.41753e+06	4.5827e+06	6.63574e+06	8.54429e+06
Q8A3W5	Ribosome-binding factor A OS=Bacteroides thetaiotaomicron (strain ATCC 29148 / DSM 2079 / NCTC 10582 / E50 / VPI-5482) OX=226186 GN=rbfA PE=3 SV=1	2.35564e+07	2.5055e+07	2.5549e+07	2.05032e+07	2.24785e+07	3.77509e+07	2.78648e+07	2.90596e+07	3.09599e+07	3.213e+07
Q8AA23	Pseudouridine synthase OS=Bacteroides thetaiotaomicron (strain ATCC 29148 / DSM 2079 / NCTC 10582 / E50 / VPI-5482) OX=226186 GN=BT_0642 PE=3 SV=1	7.92209e+06	7.53537e+06	8.12664e+06	7.41896e+06	6.90167e+06	6.45201e+06	5.2273e+06	6.88481e+06	8.82158e+06	8.69909e+06
Q8A7U2	Mannonate dehydratase OS=Bacteroides thetaiotaomicron (strain ATCC 29148 / DSM 2079 / NCTC 10582 / E50 / VPI-5482) OX=226186 GN=uxuA PE=3 SV=1	1.37112e+07	2.01461e+07	1.82323e+07	1.39083e+07	1.56449e+07	1.92122e+07	1.69934e+07	1.74269e+07	2.06177e+07	1.71819e+07
Q8ABW9	Uncharacterized protein OS=Bacteroides thetaiotaomicron (strain ATCC 29148 / DSM 2079 / NCTC 10582 / E50 / VPI-5482) OX=226186 GN=BT_p548229 PE=4 SV=1	1.07294e+07	8.11921e+06	8.76387e+06	7.16117e+06	9.37783e+06	1.0589e+07	8.25303e+06	8.90619e+06	9.94113e+06	7.08583e+06
Q8A2B9	ABC transporter, ATP-binding protein OS=Bacteroides thetaiotaomicron (strain ATCC 29148 / DSM 2079 / NCTC 10582 / E50 / VPI-5482) OX=226186 GN=BT_3386 PE=4 SV=1	5.78407e+06	5.90165e+06	4468834	4.66366e+06	9.65765e+06	5.8653e+06	3.36395e+06	8.05456e+06	6.74191e+06	3.96376e+06
Q8A9J5	Uncharacterized protein OS=Bacteroides thetaiotaomicron (strain ATCC 29148 / DSM 2079 / NCTC 10582 / E50 / VPI-5482) OX=226186 GN=BT_0820 PE=1 SV=1	2.76201e+07	2.35106e+07	2.48073e+07	2.00352e+07	1.18586e+07	2.95438e+07	2.94425e+07	2.25224e+07	3.11067e+07	2.87822e+07
Q8AA93	Acetohydroxyacid synthase small subunit Related OS=Bacteroides thetaiotaomicron (strain ATCC 29148 / DSM 2079 / NCTC 10582 / E50 / VPI-5482) OX=226186 GN=BT_0572 PE=1 SV=1	1.95471e+07	2.01697e+07	1.62261e+07	1.45285e+07	1.63712e+07	1.83671e+07	1.68947e+07	1.42929e+07	1.68782e+07	1.73649e+07
Q8A6X9	AAA_14 domain-containing protein OS=Bacteroides thetaiotaomicron (strain ATCC 29148 / DSM 2079 / NCTC 10582 / E50 / VPI-5482) OX=226186 GN=BT_1746 PE=4 SV=1	2.54418e+06	2.66979e+06	2.10028e+06	2.23708e+06	2.59144e+06	2.6923e+06	2.66692e+06	2.55374e+06	3.1819e+06	2.45682e+06
Q8A9S4	Aspartate carbamoyltransferase regulatory chain OS=Bacteroides thetaiotaomicron (strain ATCC 29148 / DSM 2079 / NCTC 10582 / E50 / VPI-5482) OX=226186 GN=pyrI PE=3 SV=1	1.73028e+07	1.68295e+07	1.34353e+07	1.28854e+07	1.14022e+07	1.62422e+07	1.71574e+07	1.19126e+07	1.53245e+07	1.53699e+07
Q8A6J6	Putative ATP-dependent RNA helicase OS=Bacteroides thetaiotaomicron (strain ATCC 29148 / DSM 2079 / NCTC 10582 / E50 / VPI-5482) OX=226186 GN=BT_1885 PE=3 SV=1	6.84469e+06	6.42453e+06	6.25685e+06	5.7671e+06	6.39189e+06	257874	202057	212453	377353	NA
Q8A7P0	AAA-ATPase_like domain-containing protein OS=Bacteroides thetaiotaomicron (strain ATCC 29148 / DSM 2079 / NCTC 10582 / E50 / VPI-5482) OX=226186 GN=BT_1484 PE=4 SV=1	5.31266e+06	3.79383e+06	4.14723e+06	3.91058e+06	2.93122e+06	4.17441e+06	3.5771e+06	2.74276e+06	4.44374e+06	4.1031e+06
Q8AB89	Putative ATPase OS=Bacteroides thetaiotaomicron (strain ATCC 29148 / DSM 2079 / NCTC 10582 / E50 / VPI-5482) OX=226186 GN=BT_0221 PE=4 SV=1	1.01955e+07	8.36659e+06	8.21266e+06	9.46275e+06	8.41323e+06	9.27803e+06	9.21516e+06	8.30559e+06	9.44153e+06	6.22087e+06
Q89YZ4	Histidine triad (HIT) protein OS=Bacteroides thetaiotaomicron (strain ATCC 29148 / DSM 2079 / NCTC 10582 / E50 / VPI-5482) OX=226186 GN=BT_4586 PE=4 SV=1	1.87562e+07	1.59904e+07	1.79653e+07	1.37496e+07	1.17833e+07	1.19768e+07	1.33824e+07	7.52902e+06	1.50051e+07	1.75366e+07
Q8A492	50S ribosomal protein L18 OS=Bacteroides thetaiotaomicron (strain ATCC 29148 / DSM 2079 / NCTC 10582 / E50 / VPI-5482) OX=226186 GN=rplR PE=3 SV=1	2.59712e+08	242391578	2.28521e+08	2.12216e+08	2.59501e+08	3.19858e+08	1.99978e+08	2.94437e+08	2.38765e+08	2.37573e+08
Q8AAD5	Anthranilate phosphoribosyltransferase OS=Bacteroides thetaiotaomicron (strain ATCC 29148 / DSM 2079 / NCTC 10582 / E50 / VPI-5482) OX=226186 GN=trpD PE=3 SV=1	5.17268e+06	7.81004e+06	8.10017e+06	6.04895e+06	5.48494e+06	5.94169e+06	7.77671e+06	4.97938e+06	5.99033e+06	6.82502e+06
Q89ZG6	DUF4627 domain-containing protein OS=Bacteroides thetaiotaomicron (strain ATCC 29148 / DSM 2079 / NCTC 10582 / E50 / VPI-5482) OX=226186 GN=BT_4411 PE=1 SV=1	1.92653e+07	1.83596e+07	1.89963e+07	1.53182e+07	1.71902e+07	1.24058e+07	8.80435e+06	1.58278e+07	1.14995e+07	1.01905e+07
Q8AAP0	50S ribosomal protein L35 OS=Bacteroides thetaiotaomicron (strain ATCC 29148 / DSM 2079 / NCTC 10582 / E50 / VPI-5482) OX=226186 GN=rpmI PE=3 SV=1	3.32726e+07	1.47329e+08	2.53113e+07	2.90309e+07	1.60072e+08	1.69243e+08	9.14393e+07	1.90427e+08	1.74742e+08	3.05771e+07
Q8A7B2	Outer membrane chaperone Skp (OmpH) OS=Bacteroides thetaiotaomicron (strain ATCC 29148 / DSM 2079 / NCTC 10582 / E50 / VPI-5482) OX=226186 GN=BT_1613 PE=3 SV=1	2.9164e+07	4.18628e+07	3.67867e+07	4.44321e+07	4.19404e+07	2.80805e+07	26509335	3.52432e+07	3.39721e+07	2.12407e+07
Q8A819	Uncharacterized protein OS=Bacteroides thetaiotaomicron (strain ATCC 29148 / DSM 2079 / NCTC 10582 / E50 / VPI-5482) OX=226186 GN=BT_1355 PE=4 SV=1	4.98294e+06	5.28416e+06	4.55753e+06	4.87686e+06	4.31095e+06	4.50365e+06	4.39817e+06	6.32232e+06	6.36412e+06	4.49487e+06
Q8A486	50S ribosomal protein L14 OS=Bacteroides thetaiotaomicron (strain ATCC 29148 / DSM 2079 / NCTC 10582 / E50 / VPI-5482) OX=226186 GN=rplN PE=3 SV=1	8.80456e+07	2.17498e+08	1.16119e+08	1.78011e+08	3.1651e+08	3.93364e+08	2.34756e+08	391393537	3.31484e+08	1.07856e+08
Q8A0T5	Prephenate dehydratase OS=Bacteroides thetaiotaomicron (strain ATCC 29148 / DSM 2079 / NCTC 10582 / E50 / VPI-5482) OX=226186 GN=BT_3936 PE=4 SV=1	1.13659e+07	1.05032e+07	1.14437e+07	9.79106e+06	8.5623e+06	7.15809e+06	7.35954e+06	6.61379e+06	8.25364e+06	9.55898e+06
Q8A8T0	Putative xylanase OS=Bacteroides thetaiotaomicron (strain ATCC 29148 / DSM 2079 / NCTC 10582 / E50 / VPI-5482) OX=226186 GN=BT_1087 PE=4 SV=1	4.60258e+06	5.80409e+06	4.91736e+06	5.78499e+06	5.79745e+06	7.97638e+06	9.93402e+06	7.36859e+06	7.80101e+06	6.12984e+06
Q8AAD6	Indole-3-glycerol phosphate synthase OS=Bacteroides thetaiotaomicron (strain ATCC 29148 / DSM 2079 / NCTC 10582 / E50 / VPI-5482) OX=226186 GN=trpC PE=3 SV=1	4.87954e+06	4.25402e+06	4.80558e+06	3.33662e+06	3.29789e+06	2.63694e+06	2.06592e+06	1.47679e+06	2.39084e+06	2.56007e+06
Q8ABC6	Uridine kinase OS=Bacteroides thetaiotaomicron (strain ATCC 29148 / DSM 2079 / NCTC 10582 / E50 / VPI-5482) OX=226186 GN=udk PE=3 SV=1	8553451	1.18334e+07	7.88236e+06	8.34232e+06	1.10281e+07	1.04257e+07	8.25478e+06	8.86741e+06	9.58262e+06	8.03248e+06
Q89YJ4	Pyruvate formate-lyase-activating enzyme OS=Bacteroides thetaiotaomicron (strain ATCC 29148 / DSM 2079 / NCTC 10582 / E50 / VPI-5482) OX=226186 GN=BT_4737 PE=3 SV=1	1.17407e+07	1.24819e+07	1.08669e+07	9.77317e+06	9.95459e+06	1.20703e+07	1.06756e+07	1.00478e+07	1.21446e+07	1.51908e+07
Q89YL5	Redox-sensitive transcriptional activator OS=Bacteroides thetaiotaomicron (strain ATCC 29148 / DSM 2079 / NCTC 10582 / E50 / VPI-5482) OX=226186 GN=BT_4716 PE=3 SV=1	6.88115e+06	7.52167e+06	6.85996e+06	6.72614e+06	5.78871e+06	6.7865e+06	5.99672e+06	5.65362e+06	7.17835e+06	8.96771e+06
Q8A3K8	Glycoside transferase family 4 OS=Bacteroides thetaiotaomicron (strain ATCC 29148 / DSM 2079 / NCTC 10582 / E50 / VPI-5482) OX=226186 GN=BT_2946 PE=4 SV=1	3.33541e+06	2.14289e+06	3.30891e+06	2.81549e+06	2.14127e+06	1.92953e+06	1.95141e+06	2.18363e+06	1.61735e+06	1.73942e+06
Q8A7M2	Uncharacterized protein OS=Bacteroides thetaiotaomicron (strain ATCC 29148 / DSM 2079 / NCTC 10582 / E50 / VPI-5482) OX=226186 GN=BT_1502 PE=4 SV=1	3.39934e+06	4.45151e+06	3.89552e+06	3.93483e+06	3.8234e+06	4.89249e+06	3.46623e+06	4.43474e+06	5.46724e+06	4.38652e+06
Q8A1U5	Putative endonuclease OS=Bacteroides thetaiotaomicron (strain ATCC 29148 / DSM 2079 / NCTC 10582 / E50 / VPI-5482) OX=226186 GN=BT_3563 PE=4 SV=1	3.34507e+06	3.74145e+06	3.36131e+06	3.4968e+06	3.02675e+06	5.16422e+06	4.08375e+06	3.94235e+06	5.62522e+06	4.35119e+06
Q8A0U4	Uncharacterized protein OS=Bacteroides thetaiotaomicron (strain ATCC 29148 / DSM 2079 / NCTC 10582 / E50 / VPI-5482) OX=226186 GN=BT_3927 PE=4 SV=1	3.33225e+07	28178139	2.79386e+07	2.79025e+07	2.49582e+07	2.92573e+07	3.30178e+07	2.54231e+07	3.02967e+07	3.35585e+07
Q8A403	Inositol-1-monophosphatase OS=Bacteroides thetaiotaomicron (strain ATCC 29148 / DSM 2079 / NCTC 10582 / E50 / VPI-5482) OX=226186 GN=BT_2801 PE=3 SV=1	6.82296e+06	7.1485e+06	5.50731e+06	5.51296e+06	7.34811e+06	7.46155e+06	7.41241e+06	7.11734e+06	7.47779e+06	8.10247e+06
Q8AAK5	Beta-N-acetylhexosaminidase OS=Bacteroides thetaiotaomicron (strain ATCC 29148 / DSM 2079 / NCTC 10582 / E50 / VPI-5482) OX=226186 GN=BT_0459 PE=3 SV=1	4.61895e+06	3.53442e+06	2.69044e+06	3.96582e+06	3.45956e+06	2.99823e+06	3.12496e+06	3.66494e+06	4.30513e+06	3.38784e+06
Q8A537	NAD-utilizing dehydrogenase OS=Bacteroides thetaiotaomicron (strain ATCC 29148 / DSM 2079 / NCTC 10582 / E50 / VPI-5482) OX=226186 GN=BT_2407 PE=4 SV=1	4.62102e+06	4.13907e+06	3.51328e+06	3.10717e+06	3.04718e+06	3.79097e+06	5.24978e+06	3.65676e+06	4.42152e+06	5.43957e+06
Q8A483	50S ribosomal protein L16 OS=Bacteroides thetaiotaomicron (strain ATCC 29148 / DSM 2079 / NCTC 10582 / E50 / VPI-5482) OX=226186 GN=rplP PE=3 SV=1	5.02447e+08	3.57705e+08	4.19597e+08	4.29402e+08	3.8465e+08	3.93167e+08	4.23359e+08	3.968e+08	3.96128e+08	3.13896e+08
Q8AB60	Dolichol-phosphate mannosyltransferase OS=Bacteroides thetaiotaomicron (strain ATCC 29148 / DSM 2079 / NCTC 10582 / E50 / VPI-5482) OX=226186 GN=BT_0251 PE=4 SV=1	1.06568e+07	1.27391e+07	1.16359e+07	1.00739e+07	1.08088e+07	1.29392e+07	1.19139e+07	1.20834e+07	1.39964e+07	8.15839e+06
Q89Z34	Putative type I restriction enzyme specificity protein OS=Bacteroides thetaiotaomicron (strain ATCC 29148 / DSM 2079 / NCTC 10582 / E50 / VPI-5482) OX=226186 GN=BT_4543 PE=4 SV=1	3.76374e+06	3.86183e+06	2.70795e+06	2.44849e+06	4.15783e+06	5.35247e+06	5.11821e+06	5.15015e+06	6.20721e+06	5.54607e+06
Q8A834	Putative lipopolysaccharide biosynthesis glycosyltransferase OS=Bacteroides thetaiotaomicron (strain ATCC 29148 / DSM 2079 / NCTC 10582 / E50 / VPI-5482) OX=226186 GN=BT_1340 PE=4 SV=1	3.08658e+06	4.13651e+06	2.24919e+06	3.68576e+06	3.94056e+06	1.71278e+06	1.3261e+06	2.46493e+06	2.51612e+06	2.23405e+06
Q8A2J4	SusD homolog OS=Bacteroides thetaiotaomicron (strain ATCC 29148 / DSM 2079 / NCTC 10582 / E50 / VPI-5482) OX=226186 GN=BT_3311 PE=3 SV=1	3.8202e+06	4.29396e+06	4.91779e+06	4.21134e+06	4.22211e+06	5.96298e+06	6.97283e+06	6.2217e+06	6.77719e+06	8.28772e+06
Q8A652	Two-component system response regulator OS=Bacteroides thetaiotaomicron (strain ATCC 29148 / DSM 2079 / NCTC 10582 / E50 / VPI-5482) OX=226186 GN=BT_2034 PE=4 SV=1	1.16639e+07	1.1343e+07	9.99116e+06	8.13752e+06	9.82519e+06	1.26504e+07	1.23744e+07	1.07207e+07	1.39317e+07	1.23541e+07
Q8ABA8	Histidinol-phosphate aminotransferase OS=Bacteroides thetaiotaomicron (strain ATCC 29148 / DSM 2079 / NCTC 10582 / E50 / VPI-5482) OX=226186 GN=hisC PE=3 SV=1	7.72024e+06	8.94394e+06	8.17777e+06	6.75177e+06	8.97852e+06	13318089	9.27338e+06	9.88816e+06	1.1858e+07	1.01794e+07
Q8A7Y3	Bacterial outer membrane protein OS=Bacteroides thetaiotaomicron (strain ATCC 29148 / DSM 2079 / NCTC 10582 / E50 / VPI-5482) OX=226186 GN=BT_1391 PE=4 SV=1	1.61922e+07	1.55123e+07	2.19921e+07	1.2368e+07	1.43454e+07	1.03911e+07	8.0316e+06	1.26584e+07	15009539	7.2242e+06
Q8A615	Isocitrate dehydrogenase [NADP] OS=Bacteroides thetaiotaomicron (strain ATCC 29148 / DSM 2079 / NCTC 10582 / E50 / VPI-5482) OX=226186 GN=BT_2071 PE=4 SV=1	9.93777e+06	8.94942e+06	9.17101e+06	7.74736e+06	6.89174e+06	9.33184e+06	9.60385e+06	8.85691e+06	1.0021e+07	1.0265e+07
Q8A421	Transcriptional regulator OS=Bacteroides thetaiotaomicron (strain ATCC 29148 / DSM 2079 / NCTC 10582 / E50 / VPI-5482) OX=226186 GN=BT_2783 PE=4 SV=1	1.34674e+07	1.21082e+07	1.17473e+07	8.78222e+06	9.65352e+06	1.44887e+07	1.40033e+07	1.23471e+07	1.46651e+07	1.74799e+07
Q8A5W7	Transmembrane protein, possibly involved in transport OS=Bacteroides thetaiotaomicron (strain ATCC 29148 / DSM 2079 / NCTC 10582 / E50 / VPI-5482) OX=226186 GN=BT_2119 PE=3 SV=1	1.18941e+07	1.11559e+07	1.30172e+07	1.15446e+07	1.28775e+07	509389	565766	618400	627739	333436
Q8A444	Uncharacterized protein OS=Bacteroides thetaiotaomicron (strain ATCC 29148 / DSM 2079 / NCTC 10582 / E50 / VPI-5482) OX=226186 GN=BT_2759 PE=4 SV=1	8.16262e+07	7.03524e+07	7.72815e+07	5.19277e+07	6.1648e+07	7.24166e+07	7.1946e+07	6.08865e+07	7.29883e+07	8.3338e+07
Q8ABD3	Uncharacterized protein OS=Bacteroides thetaiotaomicron (strain ATCC 29148 / DSM 2079 / NCTC 10582 / E50 / VPI-5482) OX=226186 GN=BT_0177 PE=4 SV=1	1.43066e+07	2.01453e+07	1.68811e+07	1.05395e+07	1.52769e+07	1.87674e+07	1.15679e+07	1.23543e+07	1.85271e+07	1.04567e+07
Q8A4P3	Putative DNA-binding protein OS=Bacteroides thetaiotaomicron (strain ATCC 29148 / DSM 2079 / NCTC 10582 / E50 / VPI-5482) OX=226186 GN=BT_2554 PE=4 SV=1	1.22975e+07	1.22477e+07	1.25944e+07	1.06217e+07	1.05048e+07	1.55494e+07	1.29547e+07	1.30041e+07	17331166	1.30844e+07
Q8A450	Putative transmembrane protein OS=Bacteroides thetaiotaomicron (strain ATCC 29148 / DSM 2079 / NCTC 10582 / E50 / VPI-5482) OX=226186 GN=BT_2753 PE=4 SV=1	1.59817e+07	1.43038e+07	1.14046e+07	1.2802e+07	1.34963e+07	9.2026e+06	4.79614e+06	9.69778e+06	9.72614e+06	5.81516e+06
Q8A9R9	Putative zinc protease OS=Bacteroides thetaiotaomicron (strain ATCC 29148 / DSM 2079 / NCTC 10582 / E50 / VPI-5482) OX=226186 GN=BT_0746 PE=4 SV=1	5.00915e+06	4.67053e+06	4.33047e+06	4.41239e+06	3.96204e+06	4.8184e+06	6.22771e+06	3.74814e+06	4.9143e+06	5.66116e+06
Q8A2R4	SusD homolog OS=Bacteroides thetaiotaomicron (strain ATCC 29148 / DSM 2079 / NCTC 10582 / E50 / VPI-5482) OX=226186 GN=BT_3241 PE=4 SV=1	1.52957e+06	2.08836e+06	1.29321e+06	1.14822e+06	1.84974e+06	4.12324e+06	4.19282e+06	4.36058e+06	4764607	3.72178e+06
Q8A989	Two-component system response regulator OS=Bacteroides thetaiotaomicron (strain ATCC 29148 / DSM 2079 / NCTC 10582 / E50 / VPI-5482) OX=226186 GN=BT_0928 PE=4 SV=1	1.00554e+07	1.12243e+07	9.00842e+06	7.68909e+06	8087549	3.83271e+06	2.89132e+06	3.26298e+06	3.91741e+06	3.60051e+06
Q8A6B4	Catalase OS=Bacteroides thetaiotaomicron (strain ATCC 29148 / DSM 2079 / NCTC 10582 / E50 / VPI-5482) OX=226186 GN=BT_1971 PE=3 SV=1	4.69115e+06	4.48141e+06	4.38261e+06	2.92491e+06	2.85261e+06	3.82188e+06	3.23344e+06	3.80217e+06	3.25213e+06	4.79381e+06
Q8A4S0	Uridine kinase (Uridine monophosphokinase) OS=Bacteroides thetaiotaomicron (strain ATCC 29148 / DSM 2079 / NCTC 10582 / E50 / VPI-5482) OX=226186 GN=BT_2527 PE=4 SV=1	5.36325e+06	5.16337e+06	5.46471e+06	5.35768e+06	4.98111e+06	4.49124e+06	4.72352e+06	3.68923e+06	4.26634e+06	4.94857e+06
Q89ZJ1	Hypoxanthine phosphoribosyltransferase OS=Bacteroides thetaiotaomicron (strain ATCC 29148 / DSM 2079 / NCTC 10582 / E50 / VPI-5482) OX=226186 GN=BT_4386 PE=3 SV=1	5.69388e+07	5.65757e+07	5.03393e+07	4.75227e+07	4.70945e+07	6.84269e+07	5.85058e+07	6.43525e+07	6.52475e+07	5.7605e+07
Q8A1E4	Glutamate racemase OS=Bacteroides thetaiotaomicron (strain ATCC 29148 / DSM 2079 / NCTC 10582 / E50 / VPI-5482) OX=226186 GN=murI PE=3 SV=1	7.36664e+06	5.54539e+06	7.46603e+06	5.31681e+06	4.52523e+06	4.94019e+06	6.22974e+06	5.55657e+06	5.33972e+06	7.5234e+06
Q8A2C3	DUF5722 domain-containing protein OS=Bacteroides thetaiotaomicron (strain ATCC 29148 / DSM 2079 / NCTC 10582 / E50 / VPI-5482) OX=226186 GN=BT_3382 PE=4 SV=1	1.49156e+07	1.3356e+07	1.27775e+07	9.87441e+06	1.24703e+07	1.14842e+07	8.22818e+06	8.75735e+06	1.12087e+07	1.03016e+07
Q8A2E3	Heptosyltransferase OS=Bacteroides thetaiotaomicron (strain ATCC 29148 / DSM 2079 / NCTC 10582 / E50 / VPI-5482) OX=226186 GN=BT_3362 PE=4 SV=1	4.94085e+06	4.96376e+06	5.5067e+06	5.52811e+06	4.21434e+06	3.94545e+06	4.167e+06	3.72375e+06	5381335	3.74256e+06
Q8A144	Putative bacterioferritin-related protein OS=Bacteroides thetaiotaomicron (strain ATCC 29148 / DSM 2079 / NCTC 10582 / E50 / VPI-5482) OX=226186 GN=BT_3823 PE=4 SV=1	1.26172e+07	1.04092e+07	1.30424e+07	8.82989e+06	1.08441e+07	7.306e+06	8.23761e+06	7.95835e+06	7.53839e+06	8.38203e+06
Q8A370	Alpha-xylosidase OS=Bacteroides thetaiotaomicron (strain ATCC 29148 / DSM 2079 / NCTC 10582 / E50 / VPI-5482) OX=226186 GN=BT_3085 PE=3 SV=1	4.62868e+06	5.74336e+06	4.48391e+06	4.24448e+06	4.03087e+06	5.1411e+06	4.92414e+06	3.71228e+06	5.95221e+06	4.6511e+06
Q8A747	Uncharacterized protein OS=Bacteroides thetaiotaomicron (strain ATCC 29148 / DSM 2079 / NCTC 10582 / E50 / VPI-5482) OX=226186 GN=BT_1678 PE=4 SV=1	1.0879e+07	1.13732e+07	9.29187e+06	6.17799e+06	7.03209e+06	9.82485e+06	8.65322e+06	5.27869e+06	1.11361e+07	9.77201e+06
Q8A7A1	Putative secreted sulfatase OS=Bacteroides thetaiotaomicron (strain ATCC 29148 / DSM 2079 / NCTC 10582 / E50 / VPI-5482) OX=226186 GN=BT_1624 PE=3 SV=1	5.4031e+06	4.91483e+06	3.88463e+06	4.42402e+06	3.55913e+06	4.59125e+06	3.26217e+06	3.6421e+06	5.0773e+06	4.89407e+06
Q8A2N8	Adenine phosphoribosyltransferase OS=Bacteroides thetaiotaomicron (strain ATCC 29148 / DSM 2079 / NCTC 10582 / E50 / VPI-5482) OX=226186 GN=apt PE=3 SV=1	6.92091e+06	1.12135e+07	6.18936e+06	6.63739e+06	1.08253e+07	1.77838e+07	7.47714e+06	1.45318e+07	1.86945e+07	9.40759e+06
Q8A8D2	AraC-type transcription regulator OS=Bacteroides thetaiotaomicron (strain ATCC 29148 / DSM 2079 / NCTC 10582 / E50 / VPI-5482) OX=226186 GN=BT_1235 PE=4 SV=1	1.06512e+07	8.8239e+06	9.10577e+06	8.14875e+06	7.10205e+06	1.45373e+06	891356	848296	1.20271e+06	1.01892e+06
Q8A749	dTTP/UTP pyrophosphatase OS=Bacteroides thetaiotaomicron (strain ATCC 29148 / DSM 2079 / NCTC 10582 / E50 / VPI-5482) OX=226186 GN=BT_1676 PE=3 SV=1	4.24355e+06	4.3269e+06	4.01341e+06	4.24874e+06	3.99797e+06	5.15501e+06	3.97375e+06	4.52654e+06	5.45551e+06	5.09907e+06
Q89YH6	Uncharacterized protein OS=Bacteroides thetaiotaomicron (strain ATCC 29148 / DSM 2079 / NCTC 10582 / E50 / VPI-5482) OX=226186 GN=BT_4756 PE=4 SV=1	1.76591e+06	2.86372e+06	1.96038e+06	2.34244e+06	3.01661e+06	4.2297e+06	1.3127e+06	2.71272e+06	4.71267e+06	1.44456e+06
Q8A0Z5	30S ribosomal protein S9 OS=Bacteroides thetaiotaomicron (strain ATCC 29148 / DSM 2079 / NCTC 10582 / E50 / VPI-5482) OX=226186 GN=rpsI PE=3 SV=1	4.41471e+08	4.2095e+08	2.41304e+08	2.73314e+08	3.48632e+08	3.44829e+08	2.51039e+08	3.7507e+08	4.84208e+08	2.62632e+08
Q8A193	Alpha-1,2-mannosidase, putative OS=Bacteroides thetaiotaomicron (strain ATCC 29148 / DSM 2079 / NCTC 10582 / E50 / VPI-5482) OX=226186 GN=BT_3773 PE=4 SV=1	2.09937e+06	4.45308e+06	1.38553e+06	1.485e+06	3.31921e+06	3.32138e+06	2.7748e+06	3.01566e+06	3.95094e+06	1.80878e+06
Q8A9E4	Diacylglycerol kinase-like, catalytic region OS=Bacteroides thetaiotaomicron (strain ATCC 29148 / DSM 2079 / NCTC 10582 / E50 / VPI-5482) OX=226186 GN=BT_0871 PE=4 SV=1	9965675	9.82023e+06	9.5254e+06	7.99458e+06	8.31264e+06	1.2052e+07	1.38742e+07	1.02385e+07	1.20432e+07	1.26124e+07
Q8A673	Putative phosphohydrolase OS=Bacteroides thetaiotaomicron (strain ATCC 29148 / DSM 2079 / NCTC 10582 / E50 / VPI-5482) OX=226186 GN=BT_2013 PE=4 SV=1	4.54212e+06	5.4562e+06	3.67794e+06	4.05186e+06	3.94234e+06	3.78414e+06	4.58671e+06	4.15415e+06	4.39939e+06	4.62397e+06
Q8A510	DUF4136 domain-containing protein OS=Bacteroides thetaiotaomicron (strain ATCC 29148 / DSM 2079 / NCTC 10582 / E50 / VPI-5482) OX=226186 GN=BT_2437 PE=1 SV=1	1.79144e+07	1.79422e+07	1.77678e+07	1.55755e+07	1.51861e+07	9.9228e+06	1.06341e+07	7.24017e+06	1.27984e+07	9.65926e+06
Q8A635	Acetyltransferase-like, GNAT family OS=Bacteroides thetaiotaomicron (strain ATCC 29148 / DSM 2079 / NCTC 10582 / E50 / VPI-5482) OX=226186 GN=BT_2051 PE=1 SV=1	2.17706e+07	1.71546e+07	2.01314e+07	2.0877e+07	1.68592e+07	2.48723e+07	2.73862e+07	2.17454e+07	2.70685e+07	3.21113e+07
Q8A1L5	Dihydropteroate synthase OS=Bacteroides thetaiotaomicron (strain ATCC 29148 / DSM 2079 / NCTC 10582 / E50 / VPI-5482) OX=226186 GN=BT_3646 PE=4 SV=1	5.82178e+06	4.93623e+06	4.55449e+06	4.40282e+06	4.94737e+06	5.86742e+06	3.75889e+06	5.11903e+06	5.95613e+06	4.45226e+06
Q8AB83	OMP_b-brl domain-containing protein OS=Bacteroides thetaiotaomicron (strain ATCC 29148 / DSM 2079 / NCTC 10582 / E50 / VPI-5482) OX=226186 GN=BT_0227 PE=4 SV=1	1.00118e+07	9.96149e+06	7.83904e+06	7.71064e+06	8.30374e+06	1.04441e+07	5.94522e+06	1.08841e+07	1.08461e+07	8.41531e+06
Q8A878	V-type ATP synthase subunit I OS=Bacteroides thetaiotaomicron (strain ATCC 29148 / DSM 2079 / NCTC 10582 / E50 / VPI-5482) OX=226186 GN=BT_1296 PE=3 SV=1	8.94548e+06	1.02398e+07	7.58193e+06	8.67607e+06	8.56284e+06	4.28313e+06	4.24044e+06	5.73254e+06	7.00028e+06	2.79935e+06
Q8AAH9	Altronate hydrolase OS=Bacteroides thetaiotaomicron (strain ATCC 29148 / DSM 2079 / NCTC 10582 / E50 / VPI-5482) OX=226186 GN=BT_0486 PE=3 SV=1	5.47377e+06	4.42353e+06	4.3802e+06	4.31e+06	3.6089e+06	4.76424e+06	5.23482e+06	4.73284e+06	5.65032e+06	5.77384e+06
Q8A0K9	Putative ABC oligo/dipeptide transport, ATP-binding protein OS=Bacteroides thetaiotaomicron (strain ATCC 29148 / DSM 2079 / NCTC 10582 / E50 / VPI-5482) OX=226186 GN=BT_4012 PE=4 SV=1	2.49951e+06	2.65105e+06	2.68786e+06	2.52739e+06	1.91159e+06	3.11274e+06	2.66482e+06	1.96705e+06	3.68625e+06	2.51592e+06
Q8A5U6	MlaD domain-containing protein OS=Bacteroides thetaiotaomicron (strain ATCC 29148 / DSM 2079 / NCTC 10582 / E50 / VPI-5482) OX=226186 GN=BT_2142 PE=4 SV=1	1.31933e+07	1.18543e+07	1.11811e+07	1.00268e+07	1.08418e+07	3.69316e+06	3.60078e+06	4.99206e+06	6.70777e+06	3.0185e+06
Q8AAN7	Xanthine phosphoribosyltransferase OS=Bacteroides thetaiotaomicron (strain ATCC 29148 / DSM 2079 / NCTC 10582 / E50 / VPI-5482) OX=226186 GN=xpt PE=3 SV=1	8.82633e+06	7.12732e+06	6.77645e+06	6.35149e+06	6.77688e+06	1.02889e+07	9.23302e+06	7.50349e+06	9.78096e+06	1.07105e+07
Q8A2R8	Uncharacterized protein OS=Bacteroides thetaiotaomicron (strain ATCC 29148 / DSM 2079 / NCTC 10582 / E50 / VPI-5482) OX=226186 GN=BT_3237 PE=4 SV=1	2.35776e+06	1.81206e+06	2.30135e+06	2.15266e+06	1.64687e+06	5.34155e+06	6.7322e+06	5.43961e+06	5.01256e+06	8.1076e+06
Q89ZW6	DNA replication and repair protein RecF OS=Bacteroides thetaiotaomicron (strain ATCC 29148 / DSM 2079 / NCTC 10582 / E50 / VPI-5482) OX=226186 GN=recF PE=3 SV=1	2.40381e+06	4.20897e+06	1.55354e+06	1.38168e+06	2.26509e+06	5.50435e+06	3.59137e+06	2.26849e+06	5.20915e+06	1.98152e+06
Q8A644	tRNA and rRNA cytosine-C5-methylase OS=Bacteroides thetaiotaomicron (strain ATCC 29148 / DSM 2079 / NCTC 10582 / E50 / VPI-5482) OX=226186 GN=BT_2042 PE=3 SV=1	6.49056e+06	5.32717e+06	4.86661e+06	5.23881e+06	4.69912e+06	3.88583e+06	4.5129e+06	3.30761e+06	3.99516e+06	4.73286e+06
Q8A5Q2	3-phosphoshikimate 1-carboxyvinyltransferase OS=Bacteroides thetaiotaomicron (strain ATCC 29148 / DSM 2079 / NCTC 10582 / E50 / VPI-5482) OX=226186 GN=aroA PE=3 SV=1	9.72281e+06	1.23769e+07	5.68203e+06	6.98154e+06	7.42502e+06	9.04757e+06	9.25531e+06	7.68636e+06	9.45028e+06	9.77814e+06
Q8A902	Putative oxidoreductase OS=Bacteroides thetaiotaomicron (strain ATCC 29148 / DSM 2079 / NCTC 10582 / E50 / VPI-5482) OX=226186 GN=BT_1015 PE=4 SV=1	5.88453e+06	8.29219e+06	8.01324e+06	5.41167e+06	7.32193e+06	1.04153e+07	9.50685e+06	9.12602e+06	1.10379e+07	7.5115e+06
Q89Z69	Uncharacterized protein OS=Bacteroides thetaiotaomicron (strain ATCC 29148 / DSM 2079 / NCTC 10582 / E50 / VPI-5482) OX=226186 GN=BT_4508 PE=4 SV=1	2.79926e+06	2.81084e+06	2.77726e+06	1.78574e+06	1.27715e+06	2.80386e+06	1.27389e+06	610604	1.32813e+06	1.54646e+06
Q8A1F4	Pseudouridine synthase OS=Bacteroides thetaiotaomicron (strain ATCC 29148 / DSM 2079 / NCTC 10582 / E50 / VPI-5482) OX=226186 GN=BT_3712 PE=3 SV=1	4.98201e+06	3.11646e+06	4.324e+06	4.10893e+06	2.11631e+06	3871919	4.74116e+06	2.60737e+06	4.32351e+06	5.94631e+06
Q8A3W2	3-dehydroquinate dehydratase OS=Bacteroides thetaiotaomicron (strain ATCC 29148 / DSM 2079 / NCTC 10582 / E50 / VPI-5482) OX=226186 GN=aroQ PE=3 SV=1	1.47599e+07	1.32057e+07	1.18574e+07	1.31569e+07	1.03723e+07	1.47063e+07	1.50578e+07	1.08066e+07	1.306e+07	1.73031e+07
Q8AB57	UPF0313 protein BT_0254 OS=Bacteroides thetaiotaomicron (strain ATCC 29148 / DSM 2079 / NCTC 10582 / E50 / VPI-5482) OX=226186 GN=BT_0254 PE=3 SV=1	3.06237e+06	2.78751e+06	3.13155e+06	3.21045e+06	2.71198e+06	4.36149e+06	5.99447e+06	3.53257e+06	4.55039e+06	3.93833e+06
Q8A2W9	Dihydrolipoyl dehydrogenase OS=Bacteroides thetaiotaomicron (strain ATCC 29148 / DSM 2079 / NCTC 10582 / E50 / VPI-5482) OX=226186 GN=BT_3186 PE=3 SV=1	3.0307e+06	4.62722e+06	2.74207e+06	2.51495e+06	3.53115e+06	3.14613e+06	3.05274e+06	2.56265e+06	3.60429e+06	2.75202e+06
Q8A7G9	2-nitropropane dioxygenase-like dioxygenase OS=Bacteroides thetaiotaomicron (strain ATCC 29148 / DSM 2079 / NCTC 10582 / E50 / VPI-5482) OX=226186 GN=BT_1555 PE=4 SV=1	1.91316e+06	1.75462e+06	1189539	1.362e+06	1.12846e+06	2.65072e+06	2.01527e+06	2.579e+06	2.33886e+06	3.79948e+06
Q8A185	Uncharacterized protein OS=Bacteroides thetaiotaomicron (strain ATCC 29148 / DSM 2079 / NCTC 10582 / E50 / VPI-5482) OX=226186 GN=BT_3781 PE=1 SV=1	2.48571e+06	3.25105e+06	2.26734e+06	1.74048e+06	2.61055e+06	5.59304e+06	4.61839e+06	4.37177e+06	5.03464e+06	4.20436e+06
Q8A2R7	SusD homolog OS=Bacteroides thetaiotaomicron (strain ATCC 29148 / DSM 2079 / NCTC 10582 / E50 / VPI-5482) OX=226186 GN=BT_3238 PE=3 SV=1	1.4365e+06	1.23339e+06	1.84416e+06	2.74491e+06	1.98929e+06	4.83027e+06	6.31291e+06	4.60438e+06	6.30697e+06	5.39084e+06
Q8A1G2	Starch-binding protein SusD OS=Bacteroides thetaiotaomicron (strain ATCC 29148 / DSM 2079 / NCTC 10582 / E50 / VPI-5482) OX=226186 GN=susD PE=1 SV=1	6.05709e+06	4.88623e+06	4.89415e+06	4.56102e+06	3.53377e+06	2.88291e+06	2.53771e+06	2.0731e+06	3.5547e+06	2.76585e+06
Q8A640	Putative cardiolipin synthetase OS=Bacteroides thetaiotaomicron (strain ATCC 29148 / DSM 2079 / NCTC 10582 / E50 / VPI-5482) OX=226186 GN=BT_2046 PE=4 SV=1	1.91747e+06	2.05697e+06	2.00665e+06	1.30438e+06	1.54671e+06	2.42384e+06	2.0093e+06	1.62506e+06	2.49734e+06	2.05216e+06
Q8A634	Putative membrane protein OS=Bacteroides thetaiotaomicron (strain ATCC 29148 / DSM 2079 / NCTC 10582 / E50 / VPI-5482) OX=226186 GN=BT_2052 PE=3 SV=1	3.05089e+07	3.10911e+07	3.1418e+07	2.61112e+07	3.02909e+07	27695656	2.72493e+07	2.64789e+07	3.63806e+07	2.50474e+07
Q8A6K2	Protease IV OS=Bacteroides thetaiotaomicron (strain ATCC 29148 / DSM 2079 / NCTC 10582 / E50 / VPI-5482) OX=226186 GN=BT_1879 PE=3 SV=1	2.73122e+06	2.39002e+06	2.21506e+06	1.90699e+06	2.46187e+06	2.17694e+06	981577	1.25739e+06	3.25183e+06	1.28603e+06
Q8A5Q8	Putative haloacid dehalogenase-like family hydrolase OS=Bacteroides thetaiotaomicron (strain ATCC 29148 / DSM 2079 / NCTC 10582 / E50 / VPI-5482) OX=226186 GN=BT_2180 PE=1 SV=1	2.51515e+06	4.20581e+06	3.44225e+06	2.45803e+06	1.66108e+06	4.09314e+06	2.3524e+06	1.83414e+06	4.41648e+06	2.06222e+06
Q8A1V7	Putative zinc protease OS=Bacteroides thetaiotaomicron (strain ATCC 29148 / DSM 2079 / NCTC 10582 / E50 / VPI-5482) OX=226186 GN=BT_3551 PE=4 SV=1	1.45703e+06	1.16437e+06	924293	582005	881582	1.12613e+06	207664	719486	1.37603e+06	240673
Q8A7E1	Thioredoxin domain-containing protein OS=Bacteroides thetaiotaomicron (strain ATCC 29148 / DSM 2079 / NCTC 10582 / E50 / VPI-5482) OX=226186 GN=BT_1583 PE=1 SV=1	5.59594e+06	1.05335e+07	7.84735e+06	7.73946e+06	8.94468e+06	3.66021e+06	3.20784e+06	4.5993e+06	5.98471e+06	3.01644e+06
Q8A8U4	DUF4136 domain-containing protein OS=Bacteroides thetaiotaomicron (strain ATCC 29148 / DSM 2079 / NCTC 10582 / E50 / VPI-5482) OX=226186 GN=BT_1073 PE=4 SV=1	4.68563e+06	5.69283e+06	3.62612e+06	4.58745e+06	4.04053e+06	2.42995e+06	1.92653e+06	1.01012e+06	2.17611e+06	1.49542e+06
Q89ZA9	Uncharacterized protein OS=Bacteroides thetaiotaomicron (strain ATCC 29148 / DSM 2079 / NCTC 10582 / E50 / VPI-5482) OX=226186 GN=BT_4468 PE=3 SV=1	8.6682e+06	1.39503e+07	8.44962e+06	6.05767e+06	6.47156e+06	1.00365e+07	1.0078e+07	1.03077e+07	1.08959e+07	1.22573e+07
Q8A066	Pectate lyase OS=Bacteroides thetaiotaomicron (strain ATCC 29148 / DSM 2079 / NCTC 10582 / E50 / VPI-5482) OX=226186 GN=BT_4155 PE=1 SV=1	2.98876e+06	3.83575e+06	2.98368e+06	2.80809e+06	3.31408e+06	3651268	4.38583e+06	4.01001e+06	3.92009e+06	2.77268e+06
Q8A1A5	Uncharacterized protein OS=Bacteroides thetaiotaomicron (strain ATCC 29148 / DSM 2079 / NCTC 10582 / E50 / VPI-5482) OX=226186 GN=BT_3761 PE=4 SV=1	2.78636e+06	3.88225e+06	2.70358e+06	2.52783e+06	3648998	7.41101e+06	5.76573e+06	6.38515e+06	7.05502e+06	4.17024e+06
Q8A2J5	SusC homolog OS=Bacteroides thetaiotaomicron (strain ATCC 29148 / DSM 2079 / NCTC 10582 / E50 / VPI-5482) OX=226186 GN=BT_3310 PE=3 SV=1	2.11177e+06	1.88553e+06	1.32955e+06	1.40188e+06	1.64448e+06	1.61168e+06	1.69677e+06	1.80514e+06	2.23081e+06	1.64999e+06
Q8A7E4	Lactoylglutathione lyase OS=Bacteroides thetaiotaomicron (strain ATCC 29148 / DSM 2079 / NCTC 10582 / E50 / VPI-5482) OX=226186 GN=BT_1580 PE=4 SV=1	8.14551e+06	1.56616e+07	9.3497e+06	8.5163e+06	1.14107e+07	1.25359e+07	1.05932e+07	1.21381e+07	1.24047e+07	8.79875e+06
Q89ZS6	Transcription regulator, CRP family OS=Bacteroides thetaiotaomicron (strain ATCC 29148 / DSM 2079 / NCTC 10582 / E50 / VPI-5482) OX=226186 GN=BT_4300 PE=1 SV=1	1.41667e+07	9.35955e+06	13111224	1.13539e+07	7.48547e+06	6.59712e+06	8.77853e+06	5.48404e+06	7.99627e+06	10005724
Q8A5G6	Ribosomal RNA small subunit methyltransferase I OS=Bacteroides thetaiotaomicron (strain ATCC 29148 / DSM 2079 / NCTC 10582 / E50 / VPI-5482) OX=226186 GN=rsmI PE=1 SV=1	8.6892e+06	9.96951e+06	1.04063e+07	9.74102e+06	7.62069e+06	7.05043e+06	6.5599e+06	4.86474e+06	7.06536e+06	7.02357e+06
Q8A498	Translation initiation factor IF-1 OS=Bacteroides thetaiotaomicron (strain ATCC 29148 / DSM 2079 / NCTC 10582 / E50 / VPI-5482) OX=226186 GN=infA PE=3 SV=1	5.27692e+07	5.08775e+07	4.29354e+07	4.53393e+07	4.68029e+07	5.47853e+07	5.72897e+07	4.71641e+07	6.15372e+07	6.29379e+07
Q8A3Z3	Alkyl hydroperoxide reductase subunit F OS=Bacteroides thetaiotaomicron (strain ATCC 29148 / DSM 2079 / NCTC 10582 / E50 / VPI-5482) OX=226186 GN=BT_2811 PE=3 SV=1	4.60461e+06	2.4252e+06	5.46597e+06	2.6557e+06	655960	1.06166e+06	7.38679e+06	3.398e+06	8.66381e+06	6.55186e+06
Q89ZW8	6,7-dimethyl-8-ribityllumazine synthase OS=Bacteroides thetaiotaomicron (strain ATCC 29148 / DSM 2079 / NCTC 10582 / E50 / VPI-5482) OX=226186 GN=ribH PE=3 SV=1	2.38373e+07	3.13407e+07	2.0155e+07	1.9349e+07	2.69526e+07	3.55616e+07	4.05767e+07	3.23499e+07	3.37264e+07	2.87476e+07
Q8A5N1	t(6)A37 threonylcarbamoyladenosine biosynthesis protein TsaE OS=Bacteroides thetaiotaomicron (strain ATCC 29148 / DSM 2079 / NCTC 10582 / E50 / VPI-5482) OX=226186 GN=BT_2207 PE=3 SV=1	2.28951e+07	2.02584e+07	2.33717e+07	2.25788e+07	1.80688e+07	2.28993e+07	2.65118e+07	2.17207e+07	2.25531e+07	3.64293e+07
Q89ZW1	Deoxycytidylate deaminase OS=Bacteroides thetaiotaomicron (strain ATCC 29148 / DSM 2079 / NCTC 10582 / E50 / VPI-5482) OX=226186 GN=BT_4260 PE=3 SV=1	6.58638e+06	6.62867e+06	4.62073e+06	5.21284e+06	9.84972e+06	9.26227e+06	5.39757e+06	9.13418e+06	9.12218e+06	5.44639e+06
Q8A4V8	50S ribosomal protein L19 OS=Bacteroides thetaiotaomicron (strain ATCC 29148 / DSM 2079 / NCTC 10582 / E50 / VPI-5482) OX=226186 GN=rplS PE=3 SV=1	2.08302e+08	3.2545e+08	1.83031e+08	1.6493e+08	3.71819e+08	4.32047e+08	4.01445e+08	449646927	3.56805e+08	2.0118e+08
Q89ZR7	Aspartate 1-decarboxylase OS=Bacteroides thetaiotaomicron (strain ATCC 29148 / DSM 2079 / NCTC 10582 / E50 / VPI-5482) OX=226186 GN=panD PE=3 SV=1	1.94467e+07	1.80162e+07	1.59389e+07	1.47338e+07	1.31422e+07	1.59919e+07	1.09999e+07	1.36973e+07	1.47503e+07	9.60967e+06
Q8A6M6	TPR-repeat-containing protein OS=Bacteroides thetaiotaomicron (strain ATCC 29148 / DSM 2079 / NCTC 10582 / E50 / VPI-5482) OX=226186 GN=BT_1851 PE=4 SV=1	5.6977e+06	5.05236e+06	4.83297e+06	4.66008e+06	4.28344e+06	4344850	4.92677e+06	4.06833e+06	5.08449e+06	5.59999e+06
Q8A1C5	Uncharacterized protein OS=Bacteroides thetaiotaomicron (strain ATCC 29148 / DSM 2079 / NCTC 10582 / E50 / VPI-5482) OX=226186 GN=BT_3741 PE=4 SV=1	3.4666e+06	3.46864e+06	3.88904e+06	2.76625e+06	2.60789e+06	5.7468e+06	5.07547e+06	4.41912e+06	5.27747e+06	5.34288e+06
Q8A1D4	Uncharacterized protein OS=Bacteroides thetaiotaomicron (strain ATCC 29148 / DSM 2079 / NCTC 10582 / E50 / VPI-5482) OX=226186 GN=BT_3732 PE=4 SV=1	1.61731e+07	1.36925e+07	1.36621e+07	1.02735e+07	1.19854e+07	1.4713e+07	1.51589e+07	1.37417e+07	1.48468e+07	1.66647e+07
Q8A5G4	Thymidine kinase OS=Bacteroides thetaiotaomicron (strain ATCC 29148 / DSM 2079 / NCTC 10582 / E50 / VPI-5482) OX=226186 GN=tdk PE=3 SV=1	4.24438e+06	5.4661e+06	5.78604e+06	4.1794e+06	5.20488e+06	7.59874e+06	7.04029e+06	5.90382e+06	7.76408e+06	6.84917e+06
Q8A7P4	Uncharacterized protein OS=Bacteroides thetaiotaomicron (strain ATCC 29148 / DSM 2079 / NCTC 10582 / E50 / VPI-5482) OX=226186 GN=BT_1480 PE=1 SV=1	1.14239e+07	7.99777e+06	8.70188e+06	6.83776e+06	8.51323e+06	11719934	1.14423e+07	1.09226e+07	1.03958e+07	1.3175e+07
Q8AAC6	Putative Na+/sulphate transporter OS=Bacteroides thetaiotaomicron (strain ATCC 29148 / DSM 2079 / NCTC 10582 / E50 / VPI-5482) OX=226186 GN=BT_0539 PE=4 SV=1	9.54196e+06	8.36092e+06	8.64205e+06	8.57336e+06	8.859e+06	8.34737e+06	6.80192e+06	8.17174e+06	8.22797e+06	8.11708e+06
Q8A9U8	ATP synthase subunit delta OS=Bacteroides thetaiotaomicron (strain ATCC 29148 / DSM 2079 / NCTC 10582 / E50 / VPI-5482) OX=226186 GN=atpH PE=3 SV=1	1.9769e+07	1.49922e+07	18804425	1.57937e+07	1.24659e+07	3.23434e+06	4.4767e+06	2.84954e+06	3.84378e+06	6.00682e+06
Q8A7R8	Thioredoxin (TRX) OS=Bacteroides thetaiotaomicron (strain ATCC 29148 / DSM 2079 / NCTC 10582 / E50 / VPI-5482) OX=226186 GN=BT_1456 PE=4 SV=1	5.8516e+06	6.51185e+06	5.57088e+06	4.03436e+06	4.48164e+06	2.80702e+06	2.33489e+06	2.62127e+06	2.77615e+06	1.93192e+06
Q8A0V4	NAD kinase OS=Bacteroides thetaiotaomicron (strain ATCC 29148 / DSM 2079 / NCTC 10582 / E50 / VPI-5482) OX=226186 GN=nadK PE=3 SV=1	4.74245e+06	5.75887e+06	5.4958e+06	5.99733e+06	4.75406e+06	5.1531e+06	3.80542e+06	4.08721e+06	5.1042e+06	5.1484e+06
Q8A9V3	ATP synthase epsilon chain OS=Bacteroides thetaiotaomicron (strain ATCC 29148 / DSM 2079 / NCTC 10582 / E50 / VPI-5482) OX=226186 GN=BT_0712 PE=3 SV=1	1.32513e+07	1.71389e+07	1.27796e+07	1.32753e+07	1.61398e+07	3.61122e+06	1.73747e+06	2.92161e+06	4.67033e+06	1.23013e+06
Q89ZP3	Uncharacterized protein OS=Bacteroides thetaiotaomicron (strain ATCC 29148 / DSM 2079 / NCTC 10582 / E50 / VPI-5482) OX=226186 GN=BT_4333 PE=4 SV=1	6.83226e+06	7.01274e+06	6.10117e+06	5.19229e+06	5.45717e+06	7.73483e+06	7.66937e+06	5.49981e+06	9.08202e+06	6.93662e+06
Q8A687	Anaerobic ribonucleoside-triphosphate reductase-activating protein OS=Bacteroides thetaiotaomicron (strain ATCC 29148 / DSM 2079 / NCTC 10582 / E50 / VPI-5482) OX=226186 GN=BT_1999 PE=3 SV=1	2.13535e+06	3.06182e+06	2.17375e+06	2.04321e+06	2.09928e+06	5.33002e+06	2.7794e+06	2.68956e+06	6.39176e+06	3.26643e+06
Q8A2D0	Aspartate aminotransferase OS=Bacteroides thetaiotaomicron (strain ATCC 29148 / DSM 2079 / NCTC 10582 / E50 / VPI-5482) OX=226186 GN=BT_3375 PE=4 SV=1	6.97754e+06	7.01009e+06	7.02151e+06	6.58457e+06	6.35744e+06	8.08922e+06	7.91166e+06	7.49358e+06	8.42313e+06	8.49259e+06
Q8A5M6	Magnesium chelatase, subunit I, putative ATPase OS=Bacteroides thetaiotaomicron (strain ATCC 29148 / DSM 2079 / NCTC 10582 / E50 / VPI-5482) OX=226186 GN=BT_2212 PE=4 SV=1	1.57936e+07	1.42248e+07	1.55074e+07	1.12245e+07	1.05322e+07	1.65988e+07	2.098e+07	1.0873e+07	2.0611e+07	2.37507e+07
Q8A8X2	Concanavalin A-like lectin/glucanase OS=Bacteroides thetaiotaomicron (strain ATCC 29148 / DSM 2079 / NCTC 10582 / E50 / VPI-5482) OX=226186 GN=BT_1045 PE=4 SV=1	5.59154e+06	4.83498e+06	4.52333e+06	3.62123e+06	4.28765e+06	5.42477e+06	4.751e+06	4.1279e+06	6.07218e+06	4.82471e+06
Q8A5W9	Outer membrane protein, putative OS=Bacteroides thetaiotaomicron (strain ATCC 29148 / DSM 2079 / NCTC 10582 / E50 / VPI-5482) OX=226186 GN=BT_2117 PE=3 SV=1	3.07182e+06	3.77223e+06	2.6027e+06	2.77277e+06	3.17313e+06	136285	111277	67862.5	238976	27169.6
Q8A765	2,3-bisphosphoglycerate-dependent phosphoglycerate mutase 2 OS=Bacteroides thetaiotaomicron (strain ATCC 29148 / DSM 2079 / NCTC 10582 / E50 / VPI-5482) OX=226186 GN=gpmA2 PE=3 SV=1	8.25554e+06	7.38912e+06	7.23937e+06	6.55048e+06	6.36023e+06	6.81394e+06	8.04666e+06	5.35657e+06	8.27655e+06	7.67024e+06
Q8A5G5	Uncharacterized protein OS=Bacteroides thetaiotaomicron (strain ATCC 29148 / DSM 2079 / NCTC 10582 / E50 / VPI-5482) OX=226186 GN=BT_2274 PE=4 SV=1	1.61504e+07	1.47369e+07	1.54232e+07	1.28374e+07	1.23377e+07	1.00279e+07	1.03125e+07	8.52743e+06	1.07797e+07	1.13591e+07
Q8A5Y3	Transcriptional regulator OS=Bacteroides thetaiotaomicron (strain ATCC 29148 / DSM 2079 / NCTC 10582 / E50 / VPI-5482) OX=226186 GN=BT_2103 PE=4 SV=1	4.60797e+06	5.445e+06	4.85296e+06	5.62221e+06	5.49327e+06	4.72158e+06	4.51486e+06	3.12786e+06	5.18708e+06	3.78095e+06
Q8A2Z0	tRNA/rRNA methyltransferase OS=Bacteroides thetaiotaomicron (strain ATCC 29148 / DSM 2079 / NCTC 10582 / E50 / VPI-5482) OX=226186 GN=BT_3165 PE=4 SV=1	4.70623e+06	6.94813e+06	4.15367e+06	4.05468e+06	6.58708e+06	5.56388e+06	5770739	5.08941e+06	6.52522e+06	7.25872e+06
Q8A2C9	Nucleotide sugar transaminase OS=Bacteroides thetaiotaomicron (strain ATCC 29148 / DSM 2079 / NCTC 10582 / E50 / VPI-5482) OX=226186 GN=BT_3376 PE=3 SV=1	4.71624e+06	4289427	2.4797e+06	2.43354e+06	3.14332e+06	5.08396e+06	3.14969e+06	3.90068e+06	5.95262e+06	4.41372e+06
Q8A955	Aldo/keto reductase OS=Bacteroides thetaiotaomicron (strain ATCC 29148 / DSM 2079 / NCTC 10582 / E50 / VPI-5482) OX=226186 GN=BT_0962 PE=4 SV=1	2.18147e+06	4.96168e+06	2.78423e+06	3.43071e+06	3.27545e+06	3.2898e+06	2.35862e+06	2.15017e+06	3.53337e+06	1.66575e+06
Q8A6A8	Uncharacterized protein OS=Bacteroides thetaiotaomicron (strain ATCC 29148 / DSM 2079 / NCTC 10582 / E50 / VPI-5482) OX=226186 GN=BT_1977 PE=4 SV=1	5.91777e+06	7.90361e+06	6.34168e+06	5.1088e+06	5.52396e+06	9.2029e+06	8.18997e+06	7.07768e+06	1.02725e+07	7.69846e+06
Q8A8Y1	Coagulation factor 5/8 type, C-terminal OS=Bacteroides thetaiotaomicron (strain ATCC 29148 / DSM 2079 / NCTC 10582 / E50 / VPI-5482) OX=226186 GN=BT_1036 PE=4 SV=1	6.70514e+06	6.4343e+06	5.46925e+06	5.34299e+06	5.15131e+06	6.12997e+06	6.0443e+06	5.86684e+06	6.87703e+06	6.80347e+06
Q8A4M0	Uncharacterized protein OS=Bacteroides thetaiotaomicron (strain ATCC 29148 / DSM 2079 / NCTC 10582 / E50 / VPI-5482) OX=226186 GN=BT_2579 PE=4 SV=1	2.54961e+06	3.83083e+06	2.48122e+06	2.04399e+06	2.50272e+06	4.45053e+06	2.10486e+06	2.18602e+06	4.62897e+06	3.46914e+06
Q8ABW8	Uncharacterized protein OS=Bacteroides thetaiotaomicron (strain ATCC 29148 / DSM 2079 / NCTC 10582 / E50 / VPI-5482) OX=226186 GN=BT_p548230 PE=4 SV=1	5.14929e+06	5.33546e+06	5.56735e+06	4.65655e+06	4.59518e+06	5.63585e+06	4.5832e+06	4.08135e+06	6.27678e+06	5.08434e+06
Q89YM8	Chloromuconate cycloisomerase OS=Bacteroides thetaiotaomicron (strain ATCC 29148 / DSM 2079 / NCTC 10582 / E50 / VPI-5482) OX=226186 GN=BT_4703 PE=4 SV=1	3.04751e+06	3.90499e+06	3.32368e+06	3.61478e+06	3.8947e+06	5.81121e+06	5.13697e+06	4.22456e+06	5.19354e+06	4.46904e+06
Q89ZC0	LUD_dom domain-containing protein OS=Bacteroides thetaiotaomicron (strain ATCC 29148 / DSM 2079 / NCTC 10582 / E50 / VPI-5482) OX=226186 GN=BT_4457 PE=4 SV=1	9.61455e+06	7.78636e+06	7.70082e+06	7.27521e+06	6.6894e+06	7.57342e+06	7.91404e+06	6.30431e+06	7.62261e+06	8141178
Q8A8X5	SusC homolog OS=Bacteroides thetaiotaomicron (strain ATCC 29148 / DSM 2079 / NCTC 10582 / E50 / VPI-5482) OX=226186 GN=BT_1042 PE=3 SV=1	3.60424e+06	4.30407e+06	5.32523e+06	4.24827e+06	5.02182e+06	6.96331e+06	9.12085e+06	8.0373e+06	8.91336e+06	9.04962e+06
Q8A707	2-aminoethylphosphonate--pyruvate transaminase OS=Bacteroides thetaiotaomicron (strain ATCC 29148 / DSM 2079 / NCTC 10582 / E50 / VPI-5482) OX=226186 GN=phnW PE=3 SV=1	2.88094e+06	4.98278e+06	2.8851e+06	2.40129e+06	2.91062e+06	4.02508e+06	3.87531e+06	2.65234e+06	4.83494e+06	4.48033e+06
Q8A459	Acetyltransferase OS=Bacteroides thetaiotaomicron (strain ATCC 29148 / DSM 2079 / NCTC 10582 / E50 / VPI-5482) OX=226186 GN=BT_2744 PE=4 SV=1	4.30717e+06	5011763	3.73212e+06	3.7732e+06	3.37984e+06	3.25985e+06	2.99011e+06	2.12801e+06	3.76741e+06	3.28145e+06
Q8ABI2	Uncharacterized protein OS=Bacteroides thetaiotaomicron (strain ATCC 29148 / DSM 2079 / NCTC 10582 / E50 / VPI-5482) OX=226186 GN=BT_0128 PE=4 SV=1	1.10862e+06	5.56611e+06	498731	913225	8.88922e+06	8.31125e+06	353163	1.00427e+07	5.84039e+06	224800
Q8A0F8	NADH dehydrogenase I, chain I OS=Bacteroides thetaiotaomicron (strain ATCC 29148 / DSM 2079 / NCTC 10582 / E50 / VPI-5482) OX=226186 GN=BT_4063 PE=4 SV=1	6.67232e+06	6.54478e+06	5.92738e+06	4.8925e+06	6.24069e+06	4.69928e+06	3.32082e+06	3.99204e+06	4.12591e+06	3.49367e+06
Q8A372	Putative ATPase OS=Bacteroides thetaiotaomicron (strain ATCC 29148 / DSM 2079 / NCTC 10582 / E50 / VPI-5482) OX=226186 GN=BT_3083 PE=4 SV=1	1.63296e+06	2.35947e+06	1.62087e+06	1.61831e+06	1.8768e+06	2.91782e+06	1.86328e+06	1.17502e+06	2.95355e+06	1.31263e+06
Q89ZP2	FtsK/SpoIIIE family protein OS=Bacteroides thetaiotaomicron (strain ATCC 29148 / DSM 2079 / NCTC 10582 / E50 / VPI-5482) OX=226186 GN=BT_4334 PE=3 SV=1	4.52371e+06	6.65436e+06	5.08737e+06	4.76484e+06	4.72901e+06	2.89359e+06	2.29064e+06	4.36164e+06	5388579	3.39255e+06
Q8A9I9	Putative FHA domain protein OS=Bacteroides thetaiotaomicron (strain ATCC 29148 / DSM 2079 / NCTC 10582 / E50 / VPI-5482) OX=226186 GN=BT_0826 PE=4 SV=1	7.22094e+06	6.46609e+06	6.91352e+06	5.13951e+06	5.48863e+06	7.31984e+06	7.46363e+06	6.98843e+06	7.59605e+06	8.01508e+06
Q8A4Q6	P-type Ca(2+) transporter OS=Bacteroides thetaiotaomicron (strain ATCC 29148 / DSM 2079 / NCTC 10582 / E50 / VPI-5482) OX=226186 GN=BT_2541 PE=4 SV=1	4.59809e+06	5.24494e+06	5.30773e+06	3.64573e+06	4.17633e+06	3.64228e+06	2.79108e+06	3.65314e+06	5.14278e+06	3.68228e+06
Q89YV1	Uncharacterized protein OS=Bacteroides thetaiotaomicron (strain ATCC 29148 / DSM 2079 / NCTC 10582 / E50 / VPI-5482) OX=226186 GN=BT_4630 PE=4 SV=1	6.5302e+06	5.25202e+06	5.61232e+06	4.96006e+06	3.83126e+06	5.64508e+06	5.54938e+06	4.56881e+06	6.20005e+06	6.32641e+06
Q8A006	Shikimate 5-dehydrogenase OS=Bacteroides thetaiotaomicron (strain ATCC 29148 / DSM 2079 / NCTC 10582 / E50 / VPI-5482) OX=226186 GN=BT_4215 PE=4 SV=1	1.03517e+07	1.34378e+07	1.04044e+07	1.25863e+07	1.20779e+07	1.60105e+07	1.55043e+07	1.41747e+07	1.54769e+07	9.66028e+06
Q8A610	Acetolactate synthase OS=Bacteroides thetaiotaomicron (strain ATCC 29148 / DSM 2079 / NCTC 10582 / E50 / VPI-5482) OX=226186 GN=BT_2076 PE=3 SV=1	1.21378e+07	1.85133e+07	1.04997e+07	9.98924e+06	8.67154e+06	1.05344e+07	9.71253e+06	9.13021e+06	1.08416e+07	1.15143e+07
Q89ZQ3	tRNA dimethylallyltransferase 2 OS=Bacteroides thetaiotaomicron (strain ATCC 29148 / DSM 2079 / NCTC 10582 / E50 / VPI-5482) OX=226186 GN=miaA2 PE=3 SV=1	2.14451e+06	3.6715e+06	3.08248e+06	2.79769e+06	2.91523e+06	2.9996e+06	3.32864e+06	2.83384e+06	4.24168e+06	3.06856e+06
Q8A589	Uncharacterized protein OS=Bacteroides thetaiotaomicron (strain ATCC 29148 / DSM 2079 / NCTC 10582 / E50 / VPI-5482) OX=226186 GN=BT_2353 PE=4 SV=1	837736	1.06871e+06	1.23793e+06	842209	771357	1.37719e+06	1.25813e+06	310495	1.26675e+06	1.32677e+06
Q8A3J6	GH115_C domain-containing protein OS=Bacteroides thetaiotaomicron (strain ATCC 29148 / DSM 2079 / NCTC 10582 / E50 / VPI-5482) OX=226186 GN=BT_2958 PE=1 SV=1	2.5408e+08	3.56096e+08	1.94256e+08	2.13731e+08	2.06856e+08	1.54366e+08	5.83299e+07	1.43853e+08	1.44159e+08	114960551
Q89ZW2	Carboxy-terminal processing protease OS=Bacteroides thetaiotaomicron (strain ATCC 29148 / DSM 2079 / NCTC 10582 / E50 / VPI-5482) OX=226186 GN=BT_4259 PE=3 SV=1	6.08685e+06	6.7817e+06	5.2826e+06	1.03518e+07	6.39618e+06	4.55734e+06	3.39632e+06	4.97034e+06	5.83163e+06	3.61264e+06
Q8A539	AAA_14 domain-containing protein OS=Bacteroides thetaiotaomicron (strain ATCC 29148 / DSM 2079 / NCTC 10582 / E50 / VPI-5482) OX=226186 GN=BT_2405 PE=4 SV=1	2.13119e+06	2.05751e+06	1.73636e+06	1.81192e+06	1.48117e+06	3.88763e+06	2.89724e+06	2.61087e+06	3.57631e+06	3.18941e+06
Q8A8M3	Uncharacterized protein OS=Bacteroides thetaiotaomicron (strain ATCC 29148 / DSM 2079 / NCTC 10582 / E50 / VPI-5482) OX=226186 GN=BT_1144 PE=4 SV=1	3.76442e+06	4.93457e+06	5.36472e+06	5.1121e+06	3.95815e+06	3.17312e+06	3.32922e+06	2.70396e+06	4.47372e+06	1.72756e+06
Q8AAT3	UDP-galactose 4-epimerase OS=Bacteroides thetaiotaomicron (strain ATCC 29148 / DSM 2079 / NCTC 10582 / E50 / VPI-5482) OX=226186 GN=BT_0381 PE=3 SV=1	7.49673e+06	6.9654e+06	6.37673e+06	6.91437e+06	6.49401e+06	7.92168e+06	8.12502e+06	5.40763e+06	7.22781e+06	6.86613e+06
Q8A2H9	tRNA-dihydrouridine synthase OS=Bacteroides thetaiotaomicron (strain ATCC 29148 / DSM 2079 / NCTC 10582 / E50 / VPI-5482) OX=226186 GN=BT_3326 PE=3 SV=1	2.40932e+06	1.69603e+06	1.63829e+06	857437	1.62069e+06	2.45346e+06	2.02119e+06	1.54255e+06	3.09146e+06	2.34003e+06
Q8A9Z2	NADP(H) oxidoreductase OS=Bacteroides thetaiotaomicron (strain ATCC 29148 / DSM 2079 / NCTC 10582 / E50 / VPI-5482) OX=226186 GN=BT_0673 PE=4 SV=1	5.08409e+06	5.18684e+06	3.17275e+06	3.91778e+06	3.82071e+06	5.73765e+06	3.96087e+06	3.77082e+06	4.24693e+06	3.84204e+06
Q8A5W0	Uncharacterized protein OS=Bacteroides thetaiotaomicron (strain ATCC 29148 / DSM 2079 / NCTC 10582 / E50 / VPI-5482) OX=226186 GN=BT_2126 PE=4 SV=1	4.70304e+06	5.39075e+06	4.28888e+06	3.76917e+06	5.98319e+06	4.61972e+06	3.37073e+06	4.76166e+06	5.66255e+06	3.60657e+06
Q8A371	Lipase, putative OS=Bacteroides thetaiotaomicron (strain ATCC 29148 / DSM 2079 / NCTC 10582 / E50 / VPI-5482) OX=226186 GN=BT_3084 PE=4 SV=1	2.21231e+06	2.8547e+06	2.15709e+06	870164	2.13053e+06	2.74024e+06	825242	625480	2.92001e+06	1.65391e+06
Q8A2G2	Putative phenylacetic acid degradation protein OS=Bacteroides thetaiotaomicron (strain ATCC 29148 / DSM 2079 / NCTC 10582 / E50 / VPI-5482) OX=226186 GN=BT_3343 PE=4 SV=1	7.93069e+06	4.93258e+06	6.59981e+06	6.30328e+06	3.95197e+06	5.86169e+06	9.06022e+06	6.19385e+06	6.61482e+06	1.1927e+07
Q8A8C7	Uncharacterized protein OS=Bacteroides thetaiotaomicron (strain ATCC 29148 / DSM 2079 / NCTC 10582 / E50 / VPI-5482) OX=226186 GN=BT_1240 PE=1 SV=1	1.09744e+07	9.78697e+06	1.10777e+07	8.54864e+06	7.96184e+06	9.11261e+06	9.21098e+06	6.73396e+06	8.71149e+06	9.14117e+06
Q8A9N4	Uncharacterized protein OS=Bacteroides thetaiotaomicron (strain ATCC 29148 / DSM 2079 / NCTC 10582 / E50 / VPI-5482) OX=226186 GN=BT_0781 PE=4 SV=1	5.20429e+06	5.04379e+06	4.09226e+06	3.56645e+06	3.32423e+06	3.01443e+06	2.40028e+06	2.06346e+06	3.37288e+06	2.79822e+06
Q8A6D0	Putative surface layer protein OS=Bacteroides thetaiotaomicron (strain ATCC 29148 / DSM 2079 / NCTC 10582 / E50 / VPI-5482) OX=226186 GN=BT_1954 PE=4 SV=1	1.09741e+07	9.8056e+06	7588377	7.7839e+06	8.15382e+06	10266234	9.43015e+06	9.71965e+06	1.02315e+07	1.04389e+07
Q8A674	Uncharacterized protein OS=Bacteroides thetaiotaomicron (strain ATCC 29148 / DSM 2079 / NCTC 10582 / E50 / VPI-5482) OX=226186 GN=BT_2012 PE=4 SV=1	2.43838e+06	3.71612e+06	2.85609e+06	2.42654e+06	2.91671e+06	4.44753e+06	3.55601e+06	3.67213e+06	4.33027e+06	2.72744e+06
Q8A451	Primosomal protein N' OS=Bacteroides thetaiotaomicron (strain ATCC 29148 / DSM 2079 / NCTC 10582 / E50 / VPI-5482) OX=226186 GN=priA PE=3 SV=1	1.30825e+07	1.09833e+07	9.54397e+06	1.03222e+07	8.84716e+06	1.32165e+07	1.49202e+07	1.03595e+07	1.36117e+07	1.39414e+07
Q8A7T9	Uncharacterized protein OS=Bacteroides thetaiotaomicron (strain ATCC 29148 / DSM 2079 / NCTC 10582 / E50 / VPI-5482) OX=226186 GN=BT_1435 PE=4 SV=1	1.59346e+07	1.5752e+07	1.17694e+07	1.20986e+07	1.54254e+07	7.70061e+06	9.69711e+06	8.42547e+06	8.02013e+06	8.12672e+06
Q8A2S2	Galactose mutarotase-like protein OS=Bacteroides thetaiotaomicron (strain ATCC 29148 / DSM 2079 / NCTC 10582 / E50 / VPI-5482) OX=226186 GN=BT_3233 PE=4 SV=1	5.11087e+06	4.84222e+06	4.53867e+06	4.73171e+06	4.79223e+06	3.58655e+06	3.3743e+06	4.37408e+06	4.20381e+06	3.70531e+06
Q8A248	Phospholipid/glycerol acyltransferase OS=Bacteroides thetaiotaomicron (strain ATCC 29148 / DSM 2079 / NCTC 10582 / E50 / VPI-5482) OX=226186 GN=BT_3458 PE=4 SV=1	4.5669e+06	4.76315e+06	4.63054e+06	5.45987e+06	4.88491e+06	3.68293e+06	2.79814e+06	3.04318e+06	4.25862e+06	2.94873e+06
Q89ZQ8	ATP-binding protein OS=Bacteroides thetaiotaomicron (strain ATCC 29148 / DSM 2079 / NCTC 10582 / E50 / VPI-5482) OX=226186 GN=BT_4318 PE=4 SV=1	6.82498e+06	6.65349e+06	4.96708e+06	5.55771e+06	4.75375e+06	7.1348e+06	7.25412e+06	5.09358e+06	6.64924e+06	4.41934e+06
Q89YQ5	Putative periplasmic protein OS=Bacteroides thetaiotaomicron (strain ATCC 29148 / DSM 2079 / NCTC 10582 / E50 / VPI-5482) OX=226186 GN=BT_4676 PE=4 SV=1	1.27452e+07	1.28797e+07	1.21299e+07	12711448	1.10247e+07	8.18066e+06	1.0952e+07	7.51026e+06	9.0674e+06	6.3341e+06
Q8AAK9	Sialidase (Neuraminidase) OS=Bacteroides thetaiotaomicron (strain ATCC 29148 / DSM 2079 / NCTC 10582 / E50 / VPI-5482) OX=226186 GN=BT_0455 PE=1 SV=1	2.50625e+06	2.6748e+06	2.85846e+06	1.59304e+06	2.23593e+06	4.02844e+06	2.62556e+06	2.80355e+06	4.31736e+06	3.45105e+06
Q8A1F6	50S ribosomal protein L34 OS=Bacteroides thetaiotaomicron (strain ATCC 29148 / DSM 2079 / NCTC 10582 / E50 / VPI-5482) OX=226186 GN=rpmH PE=3 SV=1	6.62078e+06	3.14259e+07	5.28402e+06	1.0197e+07	2.60633e+07	3.70621e+07	4.90249e+07	4.43773e+07	4.1094e+07	6.12637e+06
Q8A4M8	Glutaminase OS=Bacteroides thetaiotaomicron (strain ATCC 29148 / DSM 2079 / NCTC 10582 / E50 / VPI-5482) OX=226186 GN=glsA PE=3 SV=1	5.71684e+07	5.02451e+07	4.73056e+07	5.22717e+07	4.78142e+07	4.84682e+07	4.5214e+07	4.81516e+07	5.71707e+07	4.99459e+07
Q89ZA2	Uncharacterized protein OS=Bacteroides thetaiotaomicron (strain ATCC 29148 / DSM 2079 / NCTC 10582 / E50 / VPI-5482) OX=226186 GN=BT_4475 PE=4 SV=1	9.61186e+06	9.69229e+06	7.63277e+06	7.99016e+06	8.1621e+06	7.42685e+06	5.587e+06	7.0424e+06	7.56634e+06	6.0249e+06
Q8A1E2	Cationic outer membrane protein OS=Bacteroides thetaiotaomicron (strain ATCC 29148 / DSM 2079 / NCTC 10582 / E50 / VPI-5482) OX=226186 GN=BT_3724 PE=3 SV=1	40242201	2.56815e+07	3.26708e+07	3.03896e+07	2.29964e+07	2.99158e+07	36945143	2.98432e+07	3.05588e+07	6.70482e+07
Q8A816	Putative transcriptional regulator OS=Bacteroides thetaiotaomicron (strain ATCC 29148 / DSM 2079 / NCTC 10582 / E50 / VPI-5482) OX=226186 GN=BT_1358 PE=4 SV=1	4.09087e+06	4.79034e+06	3.9721e+06	4.04734e+06	3.53104e+06	4.36064e+06	3.41541e+06	3.13066e+06	4.51288e+06	5.14101e+06
Q8A2T1	Cytokinin riboside 5'-monophosphate phosphoribohydrolase OS=Bacteroides thetaiotaomicron (strain ATCC 29148 / DSM 2079 / NCTC 10582 / E50 / VPI-5482) OX=226186 GN=BT_3224 PE=3 SV=1	3.32602e+06	2.89682e+06	2.79221e+06	2.85882e+06	2.16835e+06	3.43632e+06	3.38497e+06	3.03004e+06	3.65367e+06	5.71451e+06
Q8A7Z6	Imidazole glycerol phosphate synthase subunit HisF OS=Bacteroides thetaiotaomicron (strain ATCC 29148 / DSM 2079 / NCTC 10582 / E50 / VPI-5482) OX=226186 GN=hisF PE=3 SV=1	6.62937e+06	5.70238e+06	5.70384e+06	4.62286e+06	4.6363e+06	6.31129e+06	2.38267e+07	5.45152e+06	6.75654e+06	2.53722e+07
Q8A9B3	Uncharacterized protein OS=Bacteroides thetaiotaomicron (strain ATCC 29148 / DSM 2079 / NCTC 10582 / E50 / VPI-5482) OX=226186 GN=BT_0902 PE=4 SV=1	9.09149e+06	8.20079e+06	8.82041e+06	8.4369e+06	7154960	5.20229e+06	4.90023e+06	4.34316e+06	5.04543e+06	6.69278e+06
Q8A744	Putative carbonic anhydrase OS=Bacteroides thetaiotaomicron (strain ATCC 29148 / DSM 2079 / NCTC 10582 / E50 / VPI-5482) OX=226186 GN=BT_1681 PE=4 SV=1	9.23913e+06	7.23946e+06	7.45998e+06	7.25099e+06	6.17826e+06	7.24517e+06	8.52773e+06	6.43284e+06	7.7086e+06	8.84503e+06
Q8A7J5	Two-component system response regulator OS=Bacteroides thetaiotaomicron (strain ATCC 29148 / DSM 2079 / NCTC 10582 / E50 / VPI-5482) OX=226186 GN=BT_1529 PE=4 SV=1	3.20876e+06	3.22215e+06	2.57976e+06	2.63865e+06	3.4725e+06	3.7033e+06	2.73325e+06	3.29594e+06	3.8606e+06	3.22384e+06
Q8A0L6	Uncharacterized protein OS=Bacteroides thetaiotaomicron (strain ATCC 29148 / DSM 2079 / NCTC 10582 / E50 / VPI-5482) OX=226186 GN=BT_4005 PE=4 SV=1	1.05407e+07	8.24229e+06	8.9708e+06	8.29578e+06	7.72819e+06	4.98635e+06	6.19437e+06	5.09001e+06	5.93561e+06	6.8053e+06
Q89YT2	Uncharacterized protein OS=Bacteroides thetaiotaomicron (strain ATCC 29148 / DSM 2079 / NCTC 10582 / E50 / VPI-5482) OX=226186 GN=BT_4649 PE=4 SV=1	1.94917e+07	2.21859e+07	1.96001e+07	1.66662e+07	1.93722e+07	1.66344e+07	2.06468e+07	1.81736e+07	1.97922e+07	1.52255e+07
Q8ABW6	Uncharacterized protein OS=Bacteroides thetaiotaomicron (strain ATCC 29148 / DSM 2079 / NCTC 10582 / E50 / VPI-5482) OX=226186 GN=BT_p548232 PE=4 SV=1	1.0649e+07	1.53093e+07	8.22946e+06	8.39444e+06	9.43309e+06	15384218	6.24133e+06	9.21693e+06	1.21824e+07	8.02132e+06
Q8ABF3	Uncharacterized protein OS=Bacteroides thetaiotaomicron (strain ATCC 29148 / DSM 2079 / NCTC 10582 / E50 / VPI-5482) OX=226186 GN=BT_0157 PE=4 SV=1	1.45513e+07	1.65236e+07	1.54717e+07	1.46081e+07	1.4219e+07	1.1647e+07	1.17945e+07	1.00557e+07	1.12261e+07	1.00342e+07
Q8A706	Sulfopyruvate decarboxylase subunit beta OS=Bacteroides thetaiotaomicron (strain ATCC 29148 / DSM 2079 / NCTC 10582 / E50 / VPI-5482) OX=226186 GN=BT_1719 PE=4 SV=1	5.26429e+06	5.49625e+06	5.62688e+06	5.24098e+06	5.05733e+06	8.31775e+06	8.74652e+06	7.15277e+06	8.71624e+06	7.0354e+06
Q89Z90	Putative membrane-bound lytic murein transglycosylase OS=Bacteroides thetaiotaomicron (strain ATCC 29148 / DSM 2079 / NCTC 10582 / E50 / VPI-5482) OX=226186 GN=BT_4487 PE=4 SV=1	2.02212e+06	4.33858e+06	3.59015e+06	2.53909e+06	3.0762e+06	5.54761e+06	3.75469e+06	3.45854e+06	5.88286e+06	2.80903e+06
Q8A496	Protein translocase subunit SecY OS=Bacteroides thetaiotaomicron (strain ATCC 29148 / DSM 2079 / NCTC 10582 / E50 / VPI-5482) OX=226186 GN=secY PE=3 SV=1	2.44449e+07	2.16071e+07	1.71484e+07	2.30961e+07	4.47652e+07	4.00582e+07	2.06167e+07	4.9984e+07	5.27755e+07	1.32324e+07
Q8A827	Glycoside transferase family 2 OS=Bacteroides thetaiotaomicron (strain ATCC 29148 / DSM 2079 / NCTC 10582 / E50 / VPI-5482) OX=226186 GN=BT_1347 PE=4 SV=1	2.52283e+06	2.23338e+06	1.72863e+06	1.75836e+06	2.14426e+06	1.98119e+06	1.98495e+06	1.75948e+06	2.43797e+06	1.68065e+06
Q8ABW2	Uncharacterized protein OS=Bacteroides thetaiotaomicron (strain ATCC 29148 / DSM 2079 / NCTC 10582 / E50 / VPI-5482) OX=226186 GN=BT_p548236 PE=4 SV=1	6.33431e+06	4.61461e+06	5.19599e+06	5.78075e+06	3.97481e+06	7.02748e+06	6.62698e+06	5.28129e+06	6.78181e+06	8.37359e+06
Q8A9U9	ATP synthase subunit b OS=Bacteroides thetaiotaomicron (strain ATCC 29148 / DSM 2079 / NCTC 10582 / E50 / VPI-5482) OX=226186 GN=atpF PE=3 SV=1	1.48176e+07	7.77862e+07	12200637	1.19505e+07	5.02185e+07	3.00051e+07	4.89533e+07	2.82193e+07	3.15352e+07	2.59823e+06
Q8AA53	Putative aminotransferase OS=Bacteroides thetaiotaomicron (strain ATCC 29148 / DSM 2079 / NCTC 10582 / E50 / VPI-5482) OX=226186 GN=BT_0612 PE=3 SV=1	1.68606e+06	1.35024e+06	578356	1.58057e+06	1.15522e+06	1.6063e+06	1.73586e+06	978212	2.17603e+06	1.37549e+06
Q8ABD4	DUF4375 domain-containing protein OS=Bacteroides thetaiotaomicron (strain ATCC 29148 / DSM 2079 / NCTC 10582 / E50 / VPI-5482) OX=226186 GN=BT_0176 PE=4 SV=1	8.16486e+06	7.62389e+06	7.90307e+06	5.03646e+06	5.97721e+06	6.16161e+06	5579870	4.04913e+06	7.82838e+06	6.91004e+06
Q8A9J6	Uncharacterized protein OS=Bacteroides thetaiotaomicron (strain ATCC 29148 / DSM 2079 / NCTC 10582 / E50 / VPI-5482) OX=226186 GN=BT_0819 PE=4 SV=1	6.2321e+06	5.92369e+06	4.77918e+06	6.30512e+06	4.91333e+06	6.51354e+06	4.25996e+06	3.03865e+06	5.35519e+06	4.83928e+06
Q8A677	Guanylate kinase OS=Bacteroides thetaiotaomicron (strain ATCC 29148 / DSM 2079 / NCTC 10582 / E50 / VPI-5482) OX=226186 GN=gmk PE=3 SV=1	8.44404e+06	1.10881e+07	9.08203e+06	9.7249e+06	9.98763e+06	1.29656e+07	1.41103e+07	1.24473e+07	1.26285e+07	1.04956e+07
Q8A0L7	Lipid-A-disaccharide synthase OS=Bacteroides thetaiotaomicron (strain ATCC 29148 / DSM 2079 / NCTC 10582 / E50 / VPI-5482) OX=226186 GN=BT_4004 PE=4 SV=1	332583	2.44286e+06	2.1689e+06	773669	2.01405e+06	2.63563e+06	565894	2.19863e+06	3.56428e+06	3.10061e+06
Q8A7W2	Iron-sulfur flavoprotein OS=Bacteroides thetaiotaomicron (strain ATCC 29148 / DSM 2079 / NCTC 10582 / E50 / VPI-5482) OX=226186 GN=BT_1412 PE=4 SV=1	9.18253e+06	7.83806e+06	7.44848e+06	6.28169e+06	9.73695e+06	8.28916e+06	9.09957e+06	8.41698e+06	8.40353e+06	1.02092e+07
Q8A0V2	Putative biopolymer transport protein OS=Bacteroides thetaiotaomicron (strain ATCC 29148 / DSM 2079 / NCTC 10582 / E50 / VPI-5482) OX=226186 GN=BT_3919 PE=3 SV=1	5.96218e+06	7.59081e+06	9.11061e+06	9.01949e+06	5.59098e+06	4.91474e+06	4.35725e+06	5.66743e+06	7.01017e+06	1.44755e+06
Q8A2B3	Nitroreductase OS=Bacteroides thetaiotaomicron (strain ATCC 29148 / DSM 2079 / NCTC 10582 / E50 / VPI-5482) OX=226186 GN=BT_3392 PE=4 SV=1	2.77622e+06	3.16888e+06	2.6236e+06	1943565	2.05469e+06	4.1095e+06	5.40518e+06	5.66085e+06	7.77108e+06	3.58322e+06
Q8AB95	Iron uptake regulatory protein OS=Bacteroides thetaiotaomicron (strain ATCC 29148 / DSM 2079 / NCTC 10582 / E50 / VPI-5482) OX=226186 GN=BT_0215 PE=3 SV=1	8.96973e+06	5.16576e+06	6.76903e+06	7.04689e+06	3.46191e+06	2.96075e+06	6.101e+06	3.29606e+06	4.46304e+06	8.37771e+06
Q8A830	Glycoside transferase family 4 OS=Bacteroides thetaiotaomicron (strain ATCC 29148 / DSM 2079 / NCTC 10582 / E50 / VPI-5482) OX=226186 GN=BT_1344 PE=4 SV=1	3.63637e+06	3.40705e+06	3.08865e+06	3.01117e+06	3.25405e+06	4.40222e+06	4.10678e+06	3.66186e+06	4.73588e+06	4.89174e+06
Q8A1E0	Isoprenyl transferase OS=Bacteroides thetaiotaomicron (strain ATCC 29148 / DSM 2079 / NCTC 10582 / E50 / VPI-5482) OX=226186 GN=uppS PE=3 SV=1	6.07764e+06	5.23665e+06	4.51257e+06	3.77432e+06	4.86739e+06	7.25161e+06	6.44584e+06	6.38779e+06	7.11526e+06	7.92804e+06
E7MCA5	Putative lipoprotein OS=Bacteroides thetaiotaomicron (strain ATCC 29148 / DSM 2079 / NCTC 10582 / E50 / VPI-5482) OX=226186 GN=BT_1976a PE=4 SV=1	4.02395e+06	4.68636e+06	4.88983e+06	3.5424e+06	4.3144e+06	3.72129e+06	2.99707e+06	3.97704e+06	4.81054e+06	3.47215e+06
Q8A6U2	Uncharacterized protein OS=Bacteroides thetaiotaomicron (strain ATCC 29148 / DSM 2079 / NCTC 10582 / E50 / VPI-5482) OX=226186 GN=BT_1784 PE=4 SV=1	3.94937e+06	4.17897e+06	4.27672e+06	3.7163e+06	3.64791e+06	2.40629e+06	2.33051e+06	2.08369e+06	2.32821e+06	1.95185e+06
Q8A8X7	SusC homolog OS=Bacteroides thetaiotaomicron (strain ATCC 29148 / DSM 2079 / NCTC 10582 / E50 / VPI-5482) OX=226186 GN=BT_1040 PE=3 SV=1	4.83734e+06	4.17274e+06	2.56067e+06	3.49371e+06	2.79621e+06	2.63476e+06	3.13886e+06	3.29715e+06	3.60235e+06	3.04962e+06
Q8A4P4	AAA-ATPase_like domain-containing protein OS=Bacteroides thetaiotaomicron (strain ATCC 29148 / DSM 2079 / NCTC 10582 / E50 / VPI-5482) OX=226186 GN=BT_2553 PE=4 SV=1	1.34827e+06	1.21687e+06	1.20625e+06	1.38603e+06	539405	1.73277e+06	1.2141e+06	1.48827e+06	1.74865e+06	1.19811e+06
Q8AAQ6	Uncharacterized protein OS=Bacteroides thetaiotaomicron (strain ATCC 29148 / DSM 2079 / NCTC 10582 / E50 / VPI-5482) OX=226186 GN=BT_0408 PE=4 SV=1	2.74761e+06	2.42697e+07	3.52942e+06	6.56183e+06	2.14506e+07	3.01655e+07	3.38985e+07	2.94216e+07	3.34071e+07	2.6515e+06
Q8A3C0	Phosphopantetheine adenylyltransferase OS=Bacteroides thetaiotaomicron (strain ATCC 29148 / DSM 2079 / NCTC 10582 / E50 / VPI-5482) OX=226186 GN=coaD PE=3 SV=1	5.42207e+06	4.98204e+06	4.9821e+06	4.79919e+06	4.28155e+06	5.12209e+06	4.67695e+06	3.60568e+06	5.8855e+06	3.45139e+06
Q8A125	Peptidyl-prolyl cis-trans isomerase OS=Bacteroides thetaiotaomicron (strain ATCC 29148 / DSM 2079 / NCTC 10582 / E50 / VPI-5482) OX=226186 GN=BT_3846 PE=4 SV=1	1.93292e+06	2.07499e+06	2.12777e+06	1.89042e+06	1.48371e+06	2.13127e+06	2.12354e+06	1.88166e+06	2.27715e+06	2.59342e+06
Q8A0L0	Site-specific DNA-methyltransferase (adenine-specific) OS=Bacteroides thetaiotaomicron (strain ATCC 29148 / DSM 2079 / NCTC 10582 / E50 / VPI-5482) OX=226186 GN=BT_4011 PE=3 SV=1	2.40028e+06	2.9808e+06	1.45094e+06	2.08094e+06	2.81798e+06	2.04967e+06	1.56151e+06	1.2556e+06	2.94635e+06	1.90209e+06
Q8A2F3	Haloacid dehalogenase-like hydrolase OS=Bacteroides thetaiotaomicron (strain ATCC 29148 / DSM 2079 / NCTC 10582 / E50 / VPI-5482) OX=226186 GN=BT_3352 PE=1 SV=1	3.91502e+06	5.75424e+06	4.93232e+06	3.9273e+06	4.55099e+06	5.1569e+06	2.81211e+06	4.52805e+06	6.0181e+06	3.76063e+06
Q8A279	Uncharacterized protein OS=Bacteroides thetaiotaomicron (strain ATCC 29148 / DSM 2079 / NCTC 10582 / E50 / VPI-5482) OX=226186 GN=BT_3427 PE=4 SV=1	6.41243e+06	5.74942e+06	6.25077e+06	5.90964e+06	6.6294e+06	6.32913e+06	6736015	5.98093e+06	7.28442e+06	7.47742e+06
Q8A5I9	Small ribosomal subunit biogenesis GTPase RsgA 2 OS=Bacteroides thetaiotaomicron (strain ATCC 29148 / DSM 2079 / NCTC 10582 / E50 / VPI-5482) OX=226186 GN=rsgA2 PE=3 SV=1	2.95071e+06	2.92121e+06	2.84152e+06	2.74256e+06	2.68945e+06	4.05901e+06	2.73751e+06	2.70913e+06	4.54893e+06	3.20252e+06
Q8A581	HTH cro/C1-type domain-containing protein OS=Bacteroides thetaiotaomicron (strain ATCC 29148 / DSM 2079 / NCTC 10582 / E50 / VPI-5482) OX=226186 GN=BT_2361 PE=4 SV=1	5.06352e+06	5.26865e+06	4.52237e+06	4.15199e+06	3.61117e+06	8.48581e+06	1.05305e+07	8.93112e+06	9.63017e+06	8.58353e+06
Q8A568	Uncharacterized protein OS=Bacteroides thetaiotaomicron (strain ATCC 29148 / DSM 2079 / NCTC 10582 / E50 / VPI-5482) OX=226186 GN=BT_2374 PE=4 SV=1	3.31534e+06	2.96591e+06	3.26878e+06	3.60224e+06	2.17631e+06	3.68196e+06	4.01452e+06	2.81347e+06	4.48889e+06	3266927
Q89ZC4	6-carboxy-5,6,7,8-tetrahydropterin synthase OS=Bacteroides thetaiotaomicron (strain ATCC 29148 / DSM 2079 / NCTC 10582 / E50 / VPI-5482) OX=226186 GN=BT_4453 PE=3 SV=1	1.16165e+07	9.84095e+06	1.12537e+07	9.09125e+06	8.8505e+06	1.22809e+07	1.40358e+07	1.05064e+07	1.2659e+07	15465008
Q8A625	4-hydroxy-3-methylbut-2-enyl diphosphate reductase OS=Bacteroides thetaiotaomicron (strain ATCC 29148 / DSM 2079 / NCTC 10582 / E50 / VPI-5482) OX=226186 GN=ispH PE=3 SV=1	4.54719e+06	4.40005e+06	4.29392e+06	4.52306e+06	4.86697e+06	3.52978e+06	5.09246e+06	3.97679e+06	3.92122e+06	6.24586e+06
E7MCA6	Uncharacterized protein OS=Bacteroides thetaiotaomicron (strain ATCC 29148 / DSM 2079 / NCTC 10582 / E50 / VPI-5482) OX=226186 GN=BT_2676a PE=4 SV=1	5.12673e+06	6.67395e+06	5.38919e+06	5.12336e+06	5.60244e+06	7.28257e+06	7.57533e+06	6.53253e+06	7.79738e+06	8.37517e+06
Q8A9T6	Transcriptional regulator OS=Bacteroides thetaiotaomicron (strain ATCC 29148 / DSM 2079 / NCTC 10582 / E50 / VPI-5482) OX=226186 GN=BT_0729 PE=4 SV=1	3.20203e+06	2.00962e+06	2.27613e+06	1.93548e+06	1.95951e+06	1.66562e+06	1.51414e+06	995288	2.26218e+06	1.99744e+06
Q8A838	Putative translation initiation inhibitor OS=Bacteroides thetaiotaomicron (strain ATCC 29148 / DSM 2079 / NCTC 10582 / E50 / VPI-5482) OX=226186 GN=BT_1336 PE=3 SV=1	1.57227e+07	1.97418e+07	1.5038e+07	1.0638e+07	2.11847e+07	3.08696e+07	1.38656e+07	2.96354e+07	2.71971e+07	16391669
Q8A9W3	Chloramphenicol acetyltransferase (CAT-III) OS=Bacteroides thetaiotaomicron (strain ATCC 29148 / DSM 2079 / NCTC 10582 / E50 / VPI-5482) OX=226186 GN=BT_0702 PE=4 SV=1	4208488	3.96314e+06	3.696e+06	3.83584e+06	3.13858e+06	4.20119e+06	3.36383e+06	2.91681e+06	4.18585e+06	4.89201e+06
Q8A3W4	O-methyltransferase OS=Bacteroides thetaiotaomicron (strain ATCC 29148 / DSM 2079 / NCTC 10582 / E50 / VPI-5482) OX=226186 GN=BT_2840 PE=4 SV=1	4.57604e+06	4.2679e+06	4.65438e+06	2.80723e+06	3.40378e+06	5.01014e+06	5.88973e+06	4.39681e+06	5.53665e+06	6.94101e+06
Q8ABZ4	SprT-like domain-containing protein OS=Bacteroides thetaiotaomicron (strain ATCC 29148 / DSM 2079 / NCTC 10582 / E50 / VPI-5482) OX=226186 GN=BT_p548204 PE=4 SV=1	4.69844e+06	4.45441e+06	4.66058e+06	3.18339e+06	4.90802e+06	6.21943e+06	4.85416e+06	5.76968e+06	5.8939e+06	5.68515e+06
Q89ZL3	DUF4105 domain-containing protein OS=Bacteroides thetaiotaomicron (strain ATCC 29148 / DSM 2079 / NCTC 10582 / E50 / VPI-5482) OX=226186 GN=BT_4364 PE=4 SV=1	2.26895e+06	2.15709e+06	1.77015e+06	1.69295e+06	2.6775e+06	2.40264e+06	1.19648e+06	2.78055e+06	3.36631e+06	1.23346e+06
Q8A9B0	TPR_REGION domain-containing protein OS=Bacteroides thetaiotaomicron (strain ATCC 29148 / DSM 2079 / NCTC 10582 / E50 / VPI-5482) OX=226186 GN=BT_0905 PE=4 SV=1	1.12866e+07	9.73097e+06	1.37662e+07	8.44983e+06	7.42075e+06	8.2732e+06	1.07635e+07	7.66168e+06	8.52931e+06	6.7483e+06
Q8AB08	Acriflavine resistance protein A OS=Bacteroides thetaiotaomicron (strain ATCC 29148 / DSM 2079 / NCTC 10582 / E50 / VPI-5482) OX=226186 GN=BT_0304 PE=3 SV=1	1.19401e+07	1.17433e+07	9.62892e+06	9.19219e+06	9.27457e+06	2.86818e+06	2.85788e+06	3.55276e+06	3.85723e+06	2.76193e+06
Q8A0X3	TonB OS=Bacteroides thetaiotaomicron (strain ATCC 29148 / DSM 2079 / NCTC 10582 / E50 / VPI-5482) OX=226186 GN=BT_3898 PE=3 SV=1	3.17051e+06	1.79638e+06	3.12625e+06	2.31534e+06	2.16299e+06	2.86216e+06	2.43707e+06	2.19054e+06	2567254	2.04186e+06
Q8A8U7	Predicted phosphoadenosine phosphosulfate reductase OS=Bacteroides thetaiotaomicron (strain ATCC 29148 / DSM 2079 / NCTC 10582 / E50 / VPI-5482) OX=226186 GN=BT_1070 PE=4 SV=1	3.03766e+06	3.76745e+06	3.15933e+06	3.0726e+06	2.74282e+06	2.33923e+06	1.66483e+06	2.1676e+06	3.53304e+06	3.05059e+06
Q89YN1	Isochorismate synthase OS=Bacteroides thetaiotaomicron (strain ATCC 29148 / DSM 2079 / NCTC 10582 / E50 / VPI-5482) OX=226186 GN=BT_4700 PE=3 SV=1	2.89502e+06	2.61382e+06	2.68329e+06	1.9376e+06	1.97507e+06	2.89923e+06	3.11868e+06	2.51913e+06	3.19121e+06	3.62112e+06
Q8ABC5	Stress responsive A/B barrel domain-like protein OS=Bacteroides thetaiotaomicron (strain ATCC 29148 / DSM 2079 / NCTC 10582 / E50 / VPI-5482) OX=226186 GN=BT_0185 PE=4 SV=1	2.33305e+07	3.53729e+07	27257685	2.63748e+07	3.44224e+07	42273631	49181137	43575990	3.78093e+07	2.751e+07
Q8A138	50S ribosomal protein L32 OS=Bacteroides thetaiotaomicron (strain ATCC 29148 / DSM 2079 / NCTC 10582 / E50 / VPI-5482) OX=226186 GN=rpmF PE=3 SV=1	1.63282e+08	101918604	80908541	1.31081e+08	1.13916e+08	8.40687e+07	91143076	64165254	66426387	88551788
Q8A0U8	2-C-methyl-D-erythritol 4-phosphate cytidylyltransferase OS=Bacteroides thetaiotaomicron (strain ATCC 29148 / DSM 2079 / NCTC 10582 / E50 / VPI-5482) OX=226186 GN=ispD PE=3 SV=1	1.32828e+06	1.75626e+06	2.31499e+06	1.3142e+06	2.16599e+06	2.36907e+06	1.63715e+06	1.50755e+06	2.85903e+06	2.04073e+06
Q8A374	Putative pectin degradation protein OS=Bacteroides thetaiotaomicron (strain ATCC 29148 / DSM 2079 / NCTC 10582 / E50 / VPI-5482) OX=226186 GN=BT_3081 PE=4 SV=1	9.46747e+06	6.24028e+06	8.73264e+06	8.32832e+06	4.67638e+06	4894066	6.76157e+06	4.85279e+06	4.23835e+06	4.23911e+06
Q8A119	Major outer membrane protein OmpA OS=Bacteroides thetaiotaomicron (strain ATCC 29148 / DSM 2079 / NCTC 10582 / E50 / VPI-5482) OX=226186 GN=BT_3852 PE=4 SV=1	6.26704e+06	4.79138e+06	5.56681e+06	4.60189e+06	6.44298e+06	7.2542e+06	6.03976e+06	8.53896e+06	6.31444e+06	6.15335e+06
Q8A9R5	Probable two-component system response regulator OS=Bacteroides thetaiotaomicron (strain ATCC 29148 / DSM 2079 / NCTC 10582 / E50 / VPI-5482) OX=226186 GN=BT_0750 PE=4 SV=1	7.2251e+06	1.10343e+07	8.1275e+06	8.32036e+06	9.97207e+06	1.00102e+07	6.95647e+06	7.15263e+06	9.37292e+06	6.18002e+06
Q8AB51	Acyltransferase family protein OS=Bacteroides thetaiotaomicron (strain ATCC 29148 / DSM 2079 / NCTC 10582 / E50 / VPI-5482) OX=226186 GN=BT_0260 PE=4 SV=1	1.15637e+07	9.93232e+06	1.07925e+07	1.03712e+07	5.52178e+06	9.33379e+06	1.05636e+07	8.03276e+06	1.05348e+07	1.1837e+07
Q8A5G8	Haloacid dehalogenase-like hydrolase OS=Bacteroides thetaiotaomicron (strain ATCC 29148 / DSM 2079 / NCTC 10582 / E50 / VPI-5482) OX=226186 GN=BT_2271 PE=1 SV=1	2.15936e+06	2.51372e+06	2.40856e+06	2.16787e+06	1.47891e+06	2.35676e+06	2.02683e+06	1.02817e+06	2.55306e+06	2.16987e+06
Q8A4P9	Leucine aminopeptidase OS=Bacteroides thetaiotaomicron (strain ATCC 29148 / DSM 2079 / NCTC 10582 / E50 / VPI-5482) OX=226186 GN=BT_2548 PE=1 SV=1	1.13751e+07	9.7673e+06	9.31649e+06	8.19775e+06	9.93327e+06	9.95934e+06	7.94546e+06	8.62685e+06	1.23421e+07	1.12176e+07
Q8A489	30S ribosomal protein S14 OS=Bacteroides thetaiotaomicron (strain ATCC 29148 / DSM 2079 / NCTC 10582 / E50 / VPI-5482) OX=226186 GN=rpsN PE=3 SV=1	8.13516e+07	7.02508e+07	7.20011e+07	6.75658e+07	1.61548e+08	1.70517e+08	6.51549e+07	1.97425e+08	1.23791e+08	4.25845e+07
Q8AA07	Gly-zipper_Omp domain-containing protein OS=Bacteroides thetaiotaomicron (strain ATCC 29148 / DSM 2079 / NCTC 10582 / E50 / VPI-5482) OX=226186 GN=BT_0658 PE=4 SV=1	422994	2.44625e+06	1.40091e+06	1.14404e+06	1767688	2.16682e+06	2.92845e+06	1.40021e+06	2.75928e+06	636395
Q8A7Z1	Oxidoreductase, aldo/keto reductase OS=Bacteroides thetaiotaomicron (strain ATCC 29148 / DSM 2079 / NCTC 10582 / E50 / VPI-5482) OX=226186 GN=BT_1383 PE=4 SV=1	1.12396e+07	1.46623e+07	1.42626e+07	1.00365e+07	1.29603e+07	1.42242e+07	1.438e+07	1.31966e+07	1.63247e+07	1.42147e+07
Q8A1D6	Regulatory protein RecX OS=Bacteroides thetaiotaomicron (strain ATCC 29148 / DSM 2079 / NCTC 10582 / E50 / VPI-5482) OX=226186 GN=recX PE=3 SV=1	4.68336e+06	3687592	4.28333e+06	3.70875e+06	3.65996e+06	6.68456e+06	6.01087e+06	6.1739e+06	7.13134e+06	7.62178e+06
Q89ZY4	tRNA pseudouridine synthase A OS=Bacteroides thetaiotaomicron (strain ATCC 29148 / DSM 2079 / NCTC 10582 / E50 / VPI-5482) OX=226186 GN=truA PE=3 SV=1	3.16519e+06	4.24158e+06	3.41813e+06	3.49841e+06	2.66374e+06	4.24782e+06	5.07394e+06	3.39334e+06	3.94845e+06	5.17565e+06
Q8A836	dTDP-4-dehydrorhamnose 3,5-epimerase OS=Bacteroides thetaiotaomicron (strain ATCC 29148 / DSM 2079 / NCTC 10582 / E50 / VPI-5482) OX=226186 GN=BT_1338 PE=3 SV=1	8.82978e+06	7.64876e+06	7.42076e+06	7.01578e+06	8.58483e+06	1.09456e+07	8.94871e+06	1.02766e+07	9.05873e+06	1.03904e+07
Q8ABC4	Thiol:disulfide interchange protein dsbD OS=Bacteroides thetaiotaomicron (strain ATCC 29148 / DSM 2079 / NCTC 10582 / E50 / VPI-5482) OX=226186 GN=BT_0186 PE=4 SV=1	5.00449e+06	5.19779e+06	5.2135e+06	4.80684e+06	4.41818e+06	3.13094e+06	2.60333e+06	2.93674e+06	4.90124e+06	3.1358e+06
Q8A7W4	Putative metallo-beta-lactamase OS=Bacteroides thetaiotaomicron (strain ATCC 29148 / DSM 2079 / NCTC 10582 / E50 / VPI-5482) OX=226186 GN=BT_1410 PE=4 SV=1	1.68185e+06	2.26463e+06	1.81859e+06	1.81162e+06	2.11843e+06	2.09244e+06	2.1157e+06	2.10151e+06	2.72446e+06	2.00969e+06
Q8A2J8	Cytokinin riboside 5'-monophosphate phosphoribohydrolase OS=Bacteroides thetaiotaomicron (strain ATCC 29148 / DSM 2079 / NCTC 10582 / E50 / VPI-5482) OX=226186 GN=BT_3307 PE=3 SV=1	3.55899e+06	2.97959e+06	3.60136e+06	2.8381e+06	2.76913e+06	4.45742e+06	4.50006e+06	3.59394e+06	4.76245e+06	4.52762e+06
Q8AB07	Putative aminoglycoside efflux pump (Acriflavine resistance protein) OS=Bacteroides thetaiotaomicron (strain ATCC 29148 / DSM 2079 / NCTC 10582 / E50 / VPI-5482) OX=226186 GN=BT_0305 PE=3 SV=1	2.04254e+06	2.83696e+06	2.53871e+06	2.19111e+06	2.57839e+06	453061	432837	1.07946e+06	1.17268e+06	532384
Q8A5H7	Uncharacterized protein OS=Bacteroides thetaiotaomicron (strain ATCC 29148 / DSM 2079 / NCTC 10582 / E50 / VPI-5482) OX=226186 GN=BT_2262 PE=1 SV=1	5.90547e+06	7.84505e+06	6.17114e+06	5.78863e+06	6.87963e+06	8.96033e+06	8.471e+06	9.32251e+06	1.1543e+07	6.64227e+06
Q8A8S8	Octanoyltransferase OS=Bacteroides thetaiotaomicron (strain ATCC 29148 / DSM 2079 / NCTC 10582 / E50 / VPI-5482) OX=226186 GN=lipB PE=3 SV=1	628377	2.8715e+06	598450	2.34972e+06	821094	857509	5.82749e+06	548647	1.16129e+06	6.15545e+06
Q8A630	Hydrolase, putative OS=Bacteroides thetaiotaomicron (strain ATCC 29148 / DSM 2079 / NCTC 10582 / E50 / VPI-5482) OX=226186 GN=BT_2056 PE=4 SV=1	3.50374e+06	2.48123e+06	4.03546e+06	1.97339e+06	1.61833e+06	2.04915e+06	2949827	1.34832e+06	3.19725e+06	3.75588e+06
Q8A0S8	YrdC-like domain-containing protein OS=Bacteroides thetaiotaomicron (strain ATCC 29148 / DSM 2079 / NCTC 10582 / E50 / VPI-5482) OX=226186 GN=BT_3943 PE=4 SV=1	5.43729e+07	4.72812e+07	3.88486e+07	4.59825e+07	4.09308e+07	3.78594e+07	3.86676e+07	4.0679e+07	4.05082e+07	4.24562e+07
Q8A8T4	Probable GTP-binding protein EngB OS=Bacteroides thetaiotaomicron (strain ATCC 29148 / DSM 2079 / NCTC 10582 / E50 / VPI-5482) OX=226186 GN=engB PE=3 SV=1	5.79477e+06	4.28955e+06	5.83911e+06	5.34417e+06	5.75354e+06	6.013e+06	5.82266e+06	5.70631e+06	6.02317e+06	5.32389e+06
Q8AB54	Xanthan lyase OS=Bacteroides thetaiotaomicron (strain ATCC 29148 / DSM 2079 / NCTC 10582 / E50 / VPI-5482) OX=226186 GN=BT_0257 PE=4 SV=1	2.57324e+06	1.61306e+06	1.14504e+06	1.67888e+06	1.04256e+06	1.47122e+06	814818	222060	1.57768e+06	927354
Q8A145	Uncharacterized protein OS=Bacteroides thetaiotaomicron (strain ATCC 29148 / DSM 2079 / NCTC 10582 / E50 / VPI-5482) OX=226186 GN=BT_3822 PE=4 SV=1	4.63096e+06	4.26328e+06	2.62519e+06	3.36176e+06	2.60659e+06	516599	420345	608329	474772	475297
Q8A0T9	DNA primase OS=Bacteroides thetaiotaomicron (strain ATCC 29148 / DSM 2079 / NCTC 10582 / E50 / VPI-5482) OX=226186 GN=dnaG PE=3 SV=1	2.21711e+06	3.18564e+06	1.92629e+06	2.1916e+06	2.62989e+06	3.32119e+06	2.02753e+06	2.71206e+06	2625883	2.0056e+06
Q8A4B8	Uncharacterized protein OS=Bacteroides thetaiotaomicron (strain ATCC 29148 / DSM 2079 / NCTC 10582 / E50 / VPI-5482) OX=226186 GN=BT_2685 PE=4 SV=1	2.91246e+07	3.09219e+07	3.2346e+07	2.81707e+07	3.26005e+07	3.54333e+07	1.69785e+07	3.43168e+07	3.11781e+07	2.46736e+07
Q8A139	Uncharacterized protein OS=Bacteroides thetaiotaomicron (strain ATCC 29148 / DSM 2079 / NCTC 10582 / E50 / VPI-5482) OX=226186 GN=BT_3832 PE=4 SV=1	4.85624e+06	2.68227e+06	4.32237e+06	3273994	2.63501e+06	2.42394e+06	2.26713e+06	2.77952e+06	1.45402e+06	4.58502e+06
Q8A8U5	Uncharacterized protein OS=Bacteroides thetaiotaomicron (strain ATCC 29148 / DSM 2079 / NCTC 10582 / E50 / VPI-5482) OX=226186 GN=BT_1072 PE=4 SV=1	1.33581e+07	1.14894e+07	1.22492e+07	1.21384e+07	8.82853e+06	6.63589e+06	7.32413e+06	5.48682e+06	3.47943e+06	8.14447e+06
Q8A1E6	Aminotransferase OS=Bacteroides thetaiotaomicron (strain ATCC 29148 / DSM 2079 / NCTC 10582 / E50 / VPI-5482) OX=226186 GN=BT_3720 PE=3 SV=1	1.37103e+06	558587	762534	769376	455696	499163	1.27067e+06	43763.8	350175	1.19829e+06
Q8A6X4	Glycine betaine transport ATP-binding protein OS=Bacteroides thetaiotaomicron (strain ATCC 29148 / DSM 2079 / NCTC 10582 / E50 / VPI-5482) OX=226186 GN=BT_1751 PE=3 SV=1	1.85304e+06	9.94562e+07	2.00055e+06	1.36308e+06	7.41392e+07	9.85172e+07	5.75805e+06	1.08004e+08	1.13654e+08	1.92695e+06
Q8A199	Lactaldehyde reductase OS=Bacteroides thetaiotaomicron (strain ATCC 29148 / DSM 2079 / NCTC 10582 / E50 / VPI-5482) OX=226186 GN=BT_3767 PE=4 SV=1	4.81588e+06	5.10324e+06	4.69515e+06	4.27824e+06	3.92803e+06	3.95136e+06	4.07304e+06	3.3883e+06	4.00777e+06	3.5104e+06
Q8A865	Uncharacterized protein OS=Bacteroides thetaiotaomicron (strain ATCC 29148 / DSM 2079 / NCTC 10582 / E50 / VPI-5482) OX=226186 GN=BT_1309 PE=4 SV=1	2.20215e+07	1.6969e+07	1.81013e+07	1.70699e+07	2.26982e+07	2.15361e+07	1.75921e+07	2.1786e+07	2.16846e+07	1.75939e+07
Q89YZ6	Aminomethyltransferase OS=Bacteroides thetaiotaomicron (strain ATCC 29148 / DSM 2079 / NCTC 10582 / E50 / VPI-5482) OX=226186 GN=gcvT PE=3 SV=1	4.75394e+06	3.9906e+06	4.92264e+06	4.38727e+06	3.90101e+06	4.35166e+06	4.34948e+06	3.56786e+06	4.3122e+06	3.90752e+06
Q8A2J2	Uncharacterized protein OS=Bacteroides thetaiotaomicron (strain ATCC 29148 / DSM 2079 / NCTC 10582 / E50 / VPI-5482) OX=226186 GN=BT_3313 PE=4 SV=1	3.26693e+06	3.72004e+06	3.08903e+06	2.69659e+06	5.06771e+06	5.82022e+06	4.41811e+06	5.81748e+06	5.80821e+06	3.51237e+06
Q8A1M3	Na+/H+ anti-porter OS=Bacteroides thetaiotaomicron (strain ATCC 29148 / DSM 2079 / NCTC 10582 / E50 / VPI-5482) OX=226186 GN=BT_3638 PE=4 SV=1	566895	1.21316e+06	494845	630932	679156	597964	115503	300944	749902	59393.6
Q8A526	Uncharacterized protein OS=Bacteroides thetaiotaomicron (strain ATCC 29148 / DSM 2079 / NCTC 10582 / E50 / VPI-5482) OX=226186 GN=BT_2418 PE=4 SV=1	8.28884e+06	8.23488e+06	7.12222e+06	6.62577e+06	5.45247e+06	7.48482e+06	7.80542e+06	6.25561e+06	8.53025e+06	7.23474e+06
Q8A6P4	Two-component system sensor histidine kinase OS=Bacteroides thetaiotaomicron (strain ATCC 29148 / DSM 2079 / NCTC 10582 / E50 / VPI-5482) OX=226186 GN=BT_1833 PE=4 SV=1	748346	1.13192e+06	355295	612749	386985	1.1527e+06	679959	963252	1.68932e+06	587191
Q8A910	Putative lipoprotein OS=Bacteroides thetaiotaomicron (strain ATCC 29148 / DSM 2079 / NCTC 10582 / E50 / VPI-5482) OX=226186 GN=BT_1007 PE=4 SV=1	1.08623e+07	8.78247e+06	9.75239e+06	7.51071e+06	8.94678e+06	1.08335e+07	9.3934e+06	9.81573e+06	8.55256e+06	1.15991e+07
Q8A2E6	Acyl carrier protein OS=Bacteroides thetaiotaomicron (strain ATCC 29148 / DSM 2079 / NCTC 10582 / E50 / VPI-5482) OX=226186 GN=acpP PE=3 SV=1	6.81797e+08	6.24663e+08	7.85613e+08	5.82668e+08	574651916	6.92719e+08	679353574	5.60078e+08	8.11583e+08	8.70491e+08
Q8A6A7	Holliday junction ATP-dependent DNA helicase RuvA OS=Bacteroides thetaiotaomicron (strain ATCC 29148 / DSM 2079 / NCTC 10582 / E50 / VPI-5482) OX=226186 GN=ruvA PE=3 SV=1	2.40988e+06	2.30149e+06	3.00087e+06	1.74587e+06	1.04759e+06	2.36549e+06	2.57339e+06	1.73674e+06	3.29139e+06	2.44183e+06
Q8A6L9	2-isopropylmalate synthase OS=Bacteroides thetaiotaomicron (strain ATCC 29148 / DSM 2079 / NCTC 10582 / E50 / VPI-5482) OX=226186 GN=BT_1858 PE=3 SV=1	2.37771e+06	2.28625e+06	2.36721e+06	2.02419e+06	1.81623e+06	2.72303e+06	1.97527e+06	1.95198e+06	2.80064e+06	2.20312e+06
Q8A7I6	Peptidoglycan hydrolase OS=Bacteroides thetaiotaomicron (strain ATCC 29148 / DSM 2079 / NCTC 10582 / E50 / VPI-5482) OX=226186 GN=BT_1538 PE=4 SV=1	1.20965e+06	1.9861e+06	723365	894783	1.43639e+06	1.1334e+06	621020	1.12721e+06	1.66213e+06	321800
Q8A8G3	Uncharacterized protein OS=Bacteroides thetaiotaomicron (strain ATCC 29148 / DSM 2079 / NCTC 10582 / E50 / VPI-5482) OX=226186 GN=BT_1204 PE=4 SV=1	2.77759e+06	2.90344e+06	2.73449e+06	2.70571e+06	2.26809e+06	2.5317e+06	2.41244e+06	2.04968e+06	2.81836e+06	3.10283e+06
Q8A1F1	Uncharacterized protein OS=Bacteroides thetaiotaomicron (strain ATCC 29148 / DSM 2079 / NCTC 10582 / E50 / VPI-5482) OX=226186 GN=BT_3715 PE=4 SV=1	1.35065e+06	1.03355e+07	943232	685644	2.03834e+07	1.53857e+07	993630	1.21883e+07	1.94642e+07	715499
Q8ABK4	Riboflavin biosynthesis protein RibD-like protein OS=Bacteroides thetaiotaomicron (strain ATCC 29148 / DSM 2079 / NCTC 10582 / E50 / VPI-5482) OX=226186 GN=BT_0106 PE=4 SV=1	3.10795e+06	2.89233e+06	2.79405e+06	2.11351e+06	2.37131e+06	2.7582e+06	2.02691e+06	2.64846e+06	2.71488e+06	2.27465e+06
Q8A5R8	Uncharacterized protein OS=Bacteroides thetaiotaomicron (strain ATCC 29148 / DSM 2079 / NCTC 10582 / E50 / VPI-5482) OX=226186 GN=BT_2170 PE=4 SV=1	6.0478e+06	3.9753e+06	4290790	3.90287e+06	3.25456e+06	9.81181e+06	1.12931e+07	1.00137e+07	1.11661e+07	1.13416e+07
Q8A2Q9	Polysaccharide deacetylase OS=Bacteroides thetaiotaomicron (strain ATCC 29148 / DSM 2079 / NCTC 10582 / E50 / VPI-5482) OX=226186 GN=BT_3246 PE=4 SV=1	895879	2.16824e+06	1.14615e+06	1.46487e+06	1.74719e+06	2.0135e+06	1.71658e+06	1.10558e+06	1.77908e+06	1.19599e+06
Q8A0Y9	Redox-sensing transcriptional repressor Rex OS=Bacteroides thetaiotaomicron (strain ATCC 29148 / DSM 2079 / NCTC 10582 / E50 / VPI-5482) OX=226186 GN=rex PE=3 SV=1	4.55956e+06	4.60548e+06	3.45237e+06	3.74087e+06	3.10706e+06	4.36092e+06	3.46695e+06	2.71483e+06	3.95235e+06	3.54388e+06
Q8A9J8	Lipoprotein OS=Bacteroides thetaiotaomicron (strain ATCC 29148 / DSM 2079 / NCTC 10582 / E50 / VPI-5482) OX=226186 GN=BT_0817 PE=4 SV=1	7.11558e+06	7.3974e+06	9.44214e+06	5.19326e+06	7.26579e+06	7.87811e+06	8.25068e+06	1.01741e+07	1.11235e+07	9.11605e+06
Q8A5Z3	Putative cytidylate kinase OS=Bacteroides thetaiotaomicron (strain ATCC 29148 / DSM 2079 / NCTC 10582 / E50 / VPI-5482) OX=226186 GN=BT_2093 PE=4 SV=1	5.56192e+06	6.02667e+06	3.78554e+06	4.91164e+06	6.6326e+06	7.42176e+06	7111581	7.07465e+06	7.82329e+06	5.84413e+06
Q8A1G1	TonB-dependent receptor SusC OS=Bacteroides thetaiotaomicron (strain ATCC 29148 / DSM 2079 / NCTC 10582 / E50 / VPI-5482) OX=226186 GN=susC PE=1 SV=1	2.98322e+06	3.49934e+06	2.45155e+06	2.79213e+06	2.82033e+06	1.28341e+06	1.37175e+06	1.14579e+06	1.82814e+06	1.2839e+06
Q8A9M3	Xylulose kinase (Xylulokinase) OS=Bacteroides thetaiotaomicron (strain ATCC 29148 / DSM 2079 / NCTC 10582 / E50 / VPI-5482) OX=226186 GN=BT_0792 PE=4 SV=1	1.72602e+06	842602	1.37744e+06	1.08329e+06	844723	616379	915652	270710	536314	1.21011e+06
Q89YP1	Alpha-amylase OS=Bacteroides thetaiotaomicron (strain ATCC 29148 / DSM 2079 / NCTC 10582 / E50 / VPI-5482) OX=226186 GN=BT_4690 PE=3 SV=1	5.02765e+06	4.47406e+06	7.3263e+06	3.755e+06	2.50828e+06	4.30909e+06	6.30886e+06	4087529	5.04109e+06	7.28111e+06
Q8A1G4	UDP-2,3-diacylglucosamine hydrolase OS=Bacteroides thetaiotaomicron (strain ATCC 29148 / DSM 2079 / NCTC 10582 / E50 / VPI-5482) OX=226186 GN=BT_3697 PE=4 SV=1	5.27663e+06	4.12783e+06	4.35636e+06	2.96541e+06	4.09027e+06	4.72553e+06	2.94695e+06	4.29826e+06	4.43772e+06	5.20995e+06
Q8A8X3	Putative secreted endoglycosidase, GH family 18 OS=Bacteroides thetaiotaomicron (strain ATCC 29148 / DSM 2079 / NCTC 10582 / E50 / VPI-5482) OX=226186 GN=BT_1044 PE=4 SV=1	1.99112e+06	2.52888e+06	5.52249e+06	1.98221e+06	1.7492e+06	2.24986e+06	1.8045e+06	1.81034e+06	3.11705e+06	1.61344e+06
Q8A8V8	UDP-glucuronate decarboxylase OS=Bacteroides thetaiotaomicron (strain ATCC 29148 / DSM 2079 / NCTC 10582 / E50 / VPI-5482) OX=226186 GN=BT_1059 PE=3 SV=1	1.97557e+06	1.4609e+06	1.55219e+06	1.6657e+06	759807	1.04787e+06	1.21664e+06	611889	1.71961e+06	2.40516e+06
Q8A8U6	Uncharacterized protein OS=Bacteroides thetaiotaomicron (strain ATCC 29148 / DSM 2079 / NCTC 10582 / E50 / VPI-5482) OX=226186 GN=BT_1071 PE=4 SV=1	1.55587e+06	1.77946e+06	1.53767e+06	2.00039e+06	1.75267e+06	3.86714e+06	3.76364e+06	2.64637e+06	3.79752e+06	3.73152e+06
Q8A2R2	DUF4987 domain-containing protein OS=Bacteroides thetaiotaomicron (strain ATCC 29148 / DSM 2079 / NCTC 10582 / E50 / VPI-5482) OX=226186 GN=BT_3243 PE=4 SV=1	670645	809896	745011	710902	730680	2.33646e+06	1.90388e+06	1.76254e+06	2080360	1.84678e+06
Q89ZZ2	Putative transcriptional regulator OS=Bacteroides thetaiotaomicron (strain ATCC 29148 / DSM 2079 / NCTC 10582 / E50 / VPI-5482) OX=226186 GN=BT_4229 PE=4 SV=1	1.27216e+06	1.67687e+06	714360	578387	738460	654177	352063	475423	1.11378e+06	495862
Q8A4S8	Glycine cleavage system H protein OS=Bacteroides thetaiotaomicron (strain ATCC 29148 / DSM 2079 / NCTC 10582 / E50 / VPI-5482) OX=226186 GN=gcvH PE=3 SV=1	4.92221e+07	52219429	5.4505e+07	5.64232e+07	4.79455e+07	5.74118e+07	63343435	5.3721e+07	60609596	4.63868e+07
Q8A2C4	DUF5722 domain-containing protein OS=Bacteroides thetaiotaomicron (strain ATCC 29148 / DSM 2079 / NCTC 10582 / E50 / VPI-5482) OX=226186 GN=BT_3381 PE=4 SV=1	4.61558e+06	3.55843e+06	2.93311e+06	2.88637e+06	3.48996e+06	2.13609e+06	2.50656e+06	2.39084e+06	2.87916e+06	2.28567e+06
Q8A8A4	Putative protease I OS=Bacteroides thetaiotaomicron (strain ATCC 29148 / DSM 2079 / NCTC 10582 / E50 / VPI-5482) OX=226186 GN=BT_1263 PE=1 SV=1	1.1505e+06	1.55573e+06	1.19938e+06	801297	858243	1.53981e+06	835523	726256	1.87521e+06	958071
Q8A307	Uncharacterized protein OS=Bacteroides thetaiotaomicron (strain ATCC 29148 / DSM 2079 / NCTC 10582 / E50 / VPI-5482) OX=226186 GN=BT_3148 PE=4 SV=1	3.98363e+06	3.74575e+06	2.87549e+06	3.16011e+06	3.08437e+06	3.97485e+06	2.79402e+06	3.36038e+06	3.63779e+06	4.20747e+06
Q8A2E4	Erythronate-4-phosphate dehydrogenase OS=Bacteroides thetaiotaomicron (strain ATCC 29148 / DSM 2079 / NCTC 10582 / E50 / VPI-5482) OX=226186 GN=pdxB PE=3 SV=1	4.2159e+06	3.74966e+06	3.97743e+06	3.01825e+06	3514429	5.29255e+06	4.69612e+06	4.05781e+06	5.19975e+06	5.9517e+06
Q8A2E8	Ribonuclease 3 OS=Bacteroides thetaiotaomicron (strain ATCC 29148 / DSM 2079 / NCTC 10582 / E50 / VPI-5482) OX=226186 GN=rnc PE=3 SV=2	1.16342e+06	1.43666e+06	1.25828e+06	1.08407e+06	1.04315e+06	1.43308e+06	1.43057e+06	1.28029e+06	1.59198e+06	1.78855e+06
Q89Z76	Ribosomal large subunit pseudouridine synthase A OS=Bacteroides thetaiotaomicron (strain ATCC 29148 / DSM 2079 / NCTC 10582 / E50 / VPI-5482) OX=226186 GN=BT_4501 PE=4 SV=1	835646	670854	821005	705168	407599	927179	389639	571919	964766	994926
Q8A4P6	Phosphate butyryltransferase OS=Bacteroides thetaiotaomicron (strain ATCC 29148 / DSM 2079 / NCTC 10582 / E50 / VPI-5482) OX=226186 GN=BT_2551 PE=3 SV=1	2.53424e+06	2.34663e+06	2.86962e+06	2.23273e+06	2.82203e+06	1.74527e+06	2.18344e+06	1.90177e+06	2.06196e+06	2.23758e+06
Q8A6N6	Neutral zinc metallopeptidase OS=Bacteroides thetaiotaomicron (strain ATCC 29148 / DSM 2079 / NCTC 10582 / E50 / VPI-5482) OX=226186 GN=BT_1841 PE=4 SV=1	3.01075e+06	2.49493e+06	2.40959e+06	1.83037e+06	2.68521e+06	892555	1.42003e+06	2.15565e+06	2.08559e+06	1.65296e+06
Q8ABF9	DUF2007 domain-containing protein OS=Bacteroides thetaiotaomicron (strain ATCC 29148 / DSM 2079 / NCTC 10582 / E50 / VPI-5482) OX=226186 GN=BT_0151 PE=4 SV=1	3.72515e+06	4.26637e+06	4.87861e+06	2.34717e+06	3.02848e+06	4.61936e+06	3.58924e+06	3.30179e+06	4.97276e+06	4.14013e+06
Q8A3B3	Histone-like bacterial DNA-binding protein OS=Bacteroides thetaiotaomicron (strain ATCC 29148 / DSM 2079 / NCTC 10582 / E50 / VPI-5482) OX=226186 GN=BT_3041 PE=4 SV=1	2.02917e+06	1.60433e+06	1.38585e+06	1.49801e+06	1.90535e+06	2.05476e+06	1.64655e+06	1.83177e+06	1.67884e+06	1.59571e+06
Q8A5P9	Aminopeptidase OS=Bacteroides thetaiotaomicron (strain ATCC 29148 / DSM 2079 / NCTC 10582 / E50 / VPI-5482) OX=226186 GN=BT_2189 PE=4 SV=1	2.11944e+06	2.75678e+06	1.88903e+06	2.42282e+06	2.24681e+06	2.30573e+06	3.36067e+06	2.01855e+06	2.49812e+06	1.74182e+06
Q8AB67	Nuclease SbcCD subunit D OS=Bacteroides thetaiotaomicron (strain ATCC 29148 / DSM 2079 / NCTC 10582 / E50 / VPI-5482) OX=226186 GN=sbcD PE=3 SV=1	2.40839e+06	2.24835e+06	2.1878e+06	2.09222e+06	1.85391e+06	1.12969e+06	1.30406e+06	688196	1.33512e+06	1.35574e+06
Q8A0N1	Putative alpha-1,2-mannosidase OS=Bacteroides thetaiotaomicron (strain ATCC 29148 / DSM 2079 / NCTC 10582 / E50 / VPI-5482) OX=226186 GN=BT_3990 PE=1 SV=1	285744	615770	NA	449171	465205	757393	628212	51244.5	746688	210627
Q8A8T2	Putative lipoprotein OS=Bacteroides thetaiotaomicron (strain ATCC 29148 / DSM 2079 / NCTC 10582 / E50 / VPI-5482) OX=226186 GN=BT_1085 PE=4 SV=1	1.03541e+07	6.98461e+06	7.1241e+06	7.98476e+06	7.26461e+06	6.76941e+06	8.08309e+06	6.23743e+06	5.90058e+06	8.87148e+06
Q8ABB1	Thioesterase superfamily like protein OS=Bacteroides thetaiotaomicron (strain ATCC 29148 / DSM 2079 / NCTC 10582 / E50 / VPI-5482) OX=226186 GN=BT_0199 PE=4 SV=1	4.6642e+06	2.60319e+06	3.66421e+06	4.30759e+06	2.01965e+06	2.09134e+06	4.49924e+06	2.73091e+06	2.47045e+06	4.42429e+06
Q8A611	Acyl-ACP thioesterase OS=Bacteroides thetaiotaomicron (strain ATCC 29148 / DSM 2079 / NCTC 10582 / E50 / VPI-5482) OX=226186 GN=BT_2075 PE=1 SV=1	2.54719e+06	2.20533e+06	2.4471e+06	1.81752e+06	1.51031e+06	1.95437e+06	1.50266e+06	1.26162e+06	1.59755e+06	902100
Q8ABZ5	Uncharacterized protein OS=Bacteroides thetaiotaomicron (strain ATCC 29148 / DSM 2079 / NCTC 10582 / E50 / VPI-5482) OX=226186 GN=BT_p548203 PE=4 SV=1	6.09468e+06	5.21936e+06	3.61616e+06	4.24275e+06	2.96239e+06	1.84878e+06	1.42968e+06	1.59739e+06	1.35882e+06	2754163
Q89ZZ9	Putative cell filamentation protein Fic-related protein OS=Bacteroides thetaiotaomicron (strain ATCC 29148 / DSM 2079 / NCTC 10582 / E50 / VPI-5482) OX=226186 GN=BT_4222 PE=4 SV=1	174585	107723	NA	1.18463e+06	63172.3	947723	97254.1	336055	1.93613e+06	119158
Q8A2C2	Homeodomain-like protein OS=Bacteroides thetaiotaomicron (strain ATCC 29148 / DSM 2079 / NCTC 10582 / E50 / VPI-5482) OX=226186 GN=BT_3383 PE=4 SV=1	2.40007e+06	3.33997e+06	1.28725e+06	1.48323e+06	1.1262e+06	2.22776e+06	813413	1.2356e+06	2094829	877042
Q89Z60	Type I site-specific deoxyribonuclease OS=Bacteroides thetaiotaomicron (strain ATCC 29148 / DSM 2079 / NCTC 10582 / E50 / VPI-5482) OX=226186 GN=BT_4517 PE=3 SV=1	1.61784e+06	1.2125e+06	1.11749e+06	1.25675e+06	816407	1.45997e+06	1.1696e+06	1.4488e+06	1.52647e+06	1.42165e+06
Q8A909	Xylanase OS=Bacteroides thetaiotaomicron (strain ATCC 29148 / DSM 2079 / NCTC 10582 / E50 / VPI-5482) OX=226186 GN=BT_1008 PE=4 SV=1	1.79865e+06	2.1261e+06	1.64448e+06	1.70982e+06	1.67181e+06	1.55491e+06	765041	566904	1.22229e+06	861295
Q8A4U2	Uncharacterized protein OS=Bacteroides thetaiotaomicron (strain ATCC 29148 / DSM 2079 / NCTC 10582 / E50 / VPI-5482) OX=226186 GN=BT_2505 PE=3 SV=1	9.89713e+06	7.12144e+06	8.31636e+06	7.87682e+06	5.8931e+06	7.32351e+06	9.89077e+06	6.92404e+06	8.23271e+06	1.18428e+07
Q8A5U7	Putative N-acetylmuramoyl-L-alanine amidase amiA OS=Bacteroides thetaiotaomicron (strain ATCC 29148 / DSM 2079 / NCTC 10582 / E50 / VPI-5482) OX=226186 GN=BT_2141 PE=4 SV=1	2.08644e+06	2.19149e+06	1.59112e+06	1.59981e+06	1.90674e+06	829486	1.09551e+06	501196	1.47577e+06	1.15881e+06
Q8AA20	OMP_b-brl domain-containing protein OS=Bacteroides thetaiotaomicron (strain ATCC 29148 / DSM 2079 / NCTC 10582 / E50 / VPI-5482) OX=226186 GN=BT_0645 PE=4 SV=1	7.89766e+06	1.08707e+07	9.3616e+06	1.32472e+07	1.25197e+07	4.55837e+06	3.84888e+06	6.31638e+06	5.17153e+06	4.20093e+06
Q8A9I7	dTDP-4-dehydrorhamnose 3,5-epimerase OS=Bacteroides thetaiotaomicron (strain ATCC 29148 / DSM 2079 / NCTC 10582 / E50 / VPI-5482) OX=226186 GN=BT_0828 PE=3 SV=1	1.07339e+06	4.1658e+06	2.40004e+06	5.0315e+06	3.58192e+06	4.38938e+06	7.65439e+06	4.61062e+06	4.71527e+06	2.58221e+06
Q8A2I1	Chondroitin sulfate ABC exolyase OS=Bacteroides thetaiotaomicron (strain ATCC 29148 / DSM 2079 / NCTC 10582 / E50 / VPI-5482) OX=226186 GN=chonabc PE=1 SV=1	763915	1.03868e+06	843393	846100	579744	514341	365424	246392	147547	434895
Q89Z83	N-acetyltransferase domain-containing protein OS=Bacteroides thetaiotaomicron (strain ATCC 29148 / DSM 2079 / NCTC 10582 / E50 / VPI-5482) OX=226186 GN=BT_4494 PE=4 SV=1	3.85741e+06	2885923	3.09153e+06	3.32924e+06	2.63054e+06	2.19472e+06	1.93178e+06	1.48347e+06	2.50551e+06	2.9589e+06
Q89YY0	AAA-ATPase_like domain-containing protein OS=Bacteroides thetaiotaomicron (strain ATCC 29148 / DSM 2079 / NCTC 10582 / E50 / VPI-5482) OX=226186 GN=BT_4600 PE=4 SV=1	1.47558e+06	1.70778e+06	1.44567e+06	1.25953e+06	1.22557e+06	1.61017e+06	1.61465e+06	1.30649e+06	1.84658e+06	1.67947e+06
Q8A7N2	Tyrosine phenol-lyase OS=Bacteroides thetaiotaomicron (strain ATCC 29148 / DSM 2079 / NCTC 10582 / E50 / VPI-5482) OX=226186 GN=BT_1492 PE=3 SV=1	3.31307e+06	2.95455e+06	3.18999e+06	2.91026e+06	2.55937e+06	3.42317e+06	3.53575e+06	3.0657e+06	3.42701e+06	4.5063e+06
Q89YN6	Outer membrane efflux protein OS=Bacteroides thetaiotaomicron (strain ATCC 29148 / DSM 2079 / NCTC 10582 / E50 / VPI-5482) OX=226186 GN=BT_4695 PE=3 SV=1	1.2579e+06	2.28266e+06	1.44396e+06	2.01942e+06	1.1549e+06	969721	1.10647e+06	542337	1.60652e+06	822669
Q8A569	Uncharacterized protein OS=Bacteroides thetaiotaomicron (strain ATCC 29148 / DSM 2079 / NCTC 10582 / E50 / VPI-5482) OX=226186 GN=BT_2373 PE=4 SV=1	2.04833e+06	2.95129e+06	1.58121e+06	1.95224e+06	2.54366e+06	2.4866e+06	2.40192e+06	1.6549e+06	2.20498e+06	1.68009e+06
Q8A377	5-nitroimidazole antibiotic resistance protein OS=Bacteroides thetaiotaomicron (strain ATCC 29148 / DSM 2079 / NCTC 10582 / E50 / VPI-5482) OX=226186 GN=BT_3078 PE=1 SV=1	1.07656e+07	1.12606e+08	9.32098e+06	1.38837e+07	1.01223e+08	1.07727e+08	115804885	1.0667e+08	1.04995e+08	1.34348e+07
G8JZS6	Outer membrane protein SusF OS=Bacteroides thetaiotaomicron (strain ATCC 29148 / DSM 2079 / NCTC 10582 / E50 / VPI-5482) OX=226186 GN=susF PE=1 SV=1	2.98341e+06	3.47577e+06	3.18475e+06	3.2904e+06	2.63991e+06	2.64677e+06	2.01055e+06	2.09095e+06	2.40514e+06	2.56281e+06
Q8A5Y8	Fe3+ ABC transporter, periplasmic iron-binding protein OS=Bacteroides thetaiotaomicron (strain ATCC 29148 / DSM 2079 / NCTC 10582 / E50 / VPI-5482) OX=226186 GN=BT_2098 PE=4 SV=1	1.45818e+06	1.10086e+06	1.16369e+06	963785	978375	1.01938e+06	700752	46690.9	1.40073e+06	946934
Q89Z58	Uncharacterized protein OS=Bacteroides thetaiotaomicron (strain ATCC 29148 / DSM 2079 / NCTC 10582 / E50 / VPI-5482) OX=226186 GN=BT_4519 PE=4 SV=1	4.8135e+07	3.53417e+07	4.20493e+07	3.71744e+07	4.22203e+07	3.23401e+07	3.3251e+07	4.07425e+07	4.13517e+07	4.05024e+07
Q8A3M2	Transcriptional regulator OS=Bacteroides thetaiotaomicron (strain ATCC 29148 / DSM 2079 / NCTC 10582 / E50 / VPI-5482) OX=226186 GN=BT_2932 PE=4 SV=1	1.80781e+06	1.98821e+06	2.2197e+06	1335227	2.4393e+06	3.94618e+06	2.03925e+06	3.54169e+06	4.31078e+06	2.33505e+06
Q8A9A8	BatA OS=Bacteroides thetaiotaomicron (strain ATCC 29148 / DSM 2079 / NCTC 10582 / E50 / VPI-5482) OX=226186 GN=BT_0907 PE=4 SV=1	3.5032e+06	3363628	3.36133e+06	2.53678e+06	2.87394e+06	1.48384e+06	1.67652e+06	2.24768e+06	2.87838e+06	1.81611e+06
Q8A5Z4	Uncharacterized transporter BT_2092 OS=Bacteroides thetaiotaomicron (strain ATCC 29148 / DSM 2079 / NCTC 10582 / E50 / VPI-5482) OX=226186 GN=BT_2092 PE=3 SV=1	3.64143e+06	2.87661e+06	3.24996e+06	3.11094e+06	2.81758e+06	2.1051e+06	1.74052e+06	2.10868e+06	1.93522e+06	2.29306e+06
Q8AAX8	TPR_REGION domain-containing protein OS=Bacteroides thetaiotaomicron (strain ATCC 29148 / DSM 2079 / NCTC 10582 / E50 / VPI-5482) OX=226186 GN=BT_0334 PE=4 SV=1	2.68536e+06	2.03155e+06	3.3175e+06	2.07966e+06	1.49537e+06	1.82114e+06	2.54521e+06	1637033	1.98255e+06	3.29976e+06
Q8A582	Transcriptional regulator OS=Bacteroides thetaiotaomicron (strain ATCC 29148 / DSM 2079 / NCTC 10582 / E50 / VPI-5482) OX=226186 GN=BT_2360 PE=4 SV=1	3.88463e+06	3.08502e+06	3.72578e+06	3.07822e+06	2.15322e+06	4.02465e+06	5.13282e+06	3.1953e+06	3.55785e+06	2.69397e+06
G8JZT0	Outer membrane protein SusE OS=Bacteroides thetaiotaomicron (strain ATCC 29148 / DSM 2079 / NCTC 10582 / E50 / VPI-5482) OX=226186 GN=susE PE=1 SV=1	4.2119e+06	4.55202e+06	4.27815e+06	3.30481e+06	3.49624e+06	3.12977e+06	3.26674e+06	2.82163e+06	3.48474e+06	3.8633e+06
Q8AAX9	4Fe-4S ferredoxin, iron-sulfur binding protein OS=Bacteroides thetaiotaomicron (strain ATCC 29148 / DSM 2079 / NCTC 10582 / E50 / VPI-5482) OX=226186 GN=BT_0333 PE=4 SV=1	8.82956e+06	1.38521e+07	1.02568e+07	9.21407e+06	1.70153e+07	2.11477e+07	1.0826e+07	1.8556e+07	2.24402e+07	1.17981e+07
Q8A029	Lipoyl synthase OS=Bacteroides thetaiotaomicron (strain ATCC 29148 / DSM 2079 / NCTC 10582 / E50 / VPI-5482) OX=226186 GN=lipA PE=3 SV=1	3.0135e+06	2432625	2.5807e+06	2.35445e+06	1.23927e+06	2.26807e+06	2.42365e+06	1.59258e+06	1.575e+06	2.8975e+06
Q8A9B4	Putative universal stress protein UspA OS=Bacteroides thetaiotaomicron (strain ATCC 29148 / DSM 2079 / NCTC 10582 / E50 / VPI-5482) OX=226186 GN=BT_0901 PE=3 SV=1	4.89513e+06	5.19489e+06	4.24907e+06	3.94635e+06	4.35224e+06	3.71854e+06	2.92232e+06	3.43502e+06	3.7019e+06	3.37598e+06
Q8A0X2	Transcriptional regulator OS=Bacteroides thetaiotaomicron (strain ATCC 29148 / DSM 2079 / NCTC 10582 / E50 / VPI-5482) OX=226186 GN=BT_3899 PE=3 SV=1	2810452	6.84228e+06	6.14336e+06	6.88387e+06	4.86349e+06	5.06304e+06	7.63204e+06	5.04894e+06	5.56076e+06	3.81082e+06
Q8A8Q2	Aldo/keto reductase OS=Bacteroides thetaiotaomicron (strain ATCC 29148 / DSM 2079 / NCTC 10582 / E50 / VPI-5482) OX=226186 GN=BT_1115 PE=4 SV=1	827042	1.13053e+06	630329	938062	953890	2.13327e+06	1.74322e+06	1.83088e+06	2.68389e+06	1.35337e+06
Q8A1M1	Lipoprotein-releasing system ATP-binding protein LolD OS=Bacteroides thetaiotaomicron (strain ATCC 29148 / DSM 2079 / NCTC 10582 / E50 / VPI-5482) OX=226186 GN=lolD PE=3 SV=1	2787167	3.11774e+06	3.02239e+06	2.64527e+06	2.66819e+06	3.15702e+06	4.50401e+06	3.81621e+06	4.39855e+06	4.51689e+06
Q8AA74	Uncharacterized protein OS=Bacteroides thetaiotaomicron (strain ATCC 29148 / DSM 2079 / NCTC 10582 / E50 / VPI-5482) OX=226186 GN=BT_0591 PE=4 SV=1	9.18481e+06	8.5243e+06	9.41755e+06	5.15375e+06	7.31136e+06	9.04042e+06	1.21268e+07	1.01068e+07	1.08323e+07	8.87719e+06
Q8A8A9	Putative acetyltransferase OS=Bacteroides thetaiotaomicron (strain ATCC 29148 / DSM 2079 / NCTC 10582 / E50 / VPI-5482) OX=226186 GN=BT_1258 PE=4 SV=1	2.55723e+06	3.38328e+06	3.60479e+06	3.48591e+06	3.07851e+06	3.68104e+06	2.98009e+06	3.07262e+06	3.60675e+06	2.86096e+06
Q89ZG1	Copper homeostasis protein CutC OS=Bacteroides thetaiotaomicron (strain ATCC 29148 / DSM 2079 / NCTC 10582 / E50 / VPI-5482) OX=226186 GN=cutC PE=3 SV=1	7.18881e+06	5.37753e+06	6.7024e+06	6.28065e+06	4.93939e+06	6.50015e+06	6.90986e+06	5744671	7.00518e+06	9.78452e+06
Q8AB72	Thiol:disulfide interchange protein OS=Bacteroides thetaiotaomicron (strain ATCC 29148 / DSM 2079 / NCTC 10582 / E50 / VPI-5482) OX=226186 GN=BT_0239 PE=4 SV=1	1.58795e+06	3.99038e+06	4.28824e+06	4.77685e+06	3.4309e+06	2.40316e+06	2.26657e+06	1.89853e+06	3.08873e+06	888717
Q89YP0	Ribosomal RNA large subunit methyltransferase F OS=Bacteroides thetaiotaomicron (strain ATCC 29148 / DSM 2079 / NCTC 10582 / E50 / VPI-5482) OX=226186 GN=rlmF PE=3 SV=1	2.02603e+06	1.77059e+06	1984190	2.2149e+06	1.38452e+06	944558	1.17003e+06	353578	923578	409173
Q8A194	Ribosomal large subunit pseudouridine synthase D OS=Bacteroides thetaiotaomicron (strain ATCC 29148 / DSM 2079 / NCTC 10582 / E50 / VPI-5482) OX=226186 GN=BT_3772 PE=4 SV=1	3.18747e+06	2.92527e+06	2.73093e+06	3.59887e+06	2.45046e+06	3045239	2.60324e+06	2.97077e+06	2.92406e+06	3.30655e+06
Q8A4M1	Beta-lactamase-like protein OS=Bacteroides thetaiotaomicron (strain ATCC 29148 / DSM 2079 / NCTC 10582 / E50 / VPI-5482) OX=226186 GN=BT_2578 PE=4 SV=1	772284	1.88315e+06	856190	1.13171e+06	532526	1.63548e+06	1.51323e+06	1.30191e+06	1.6719e+06	1.32276e+06
Q8A3Q5	Uncharacterized protein OS=Bacteroides thetaiotaomicron (strain ATCC 29148 / DSM 2079 / NCTC 10582 / E50 / VPI-5482) OX=226186 GN=BT_2899 PE=4 SV=1	826270	966315	513229	662395	428308	755380	448560	584313	655547	715258
Q8A6P0	Putative GTP-binding protein, putative GTPase OS=Bacteroides thetaiotaomicron (strain ATCC 29148 / DSM 2079 / NCTC 10582 / E50 / VPI-5482) OX=226186 GN=BT_1837 PE=4 SV=1	2.00685e+06	1.57125e+06	1.49524e+06	1.54754e+06	1.72328e+06	2.77595e+06	2.22842e+06	2.70828e+06	2.36177e+06	2.23524e+06
Q8AA34	Uncharacterized protein OS=Bacteroides thetaiotaomicron (strain ATCC 29148 / DSM 2079 / NCTC 10582 / E50 / VPI-5482) OX=226186 GN=BT_0631 PE=4 SV=1	1.08274e+06	1.67543e+06	492806	1.01586e+06	1.31647e+06	2.72308e+06	1.66487e+06	2.52326e+06	3.19871e+06	1.82695e+06
Q89Z38	Uncharacterized protein OS=Bacteroides thetaiotaomicron (strain ATCC 29148 / DSM 2079 / NCTC 10582 / E50 / VPI-5482) OX=226186 GN=BT_4539 PE=4 SV=1	2.19649e+06	1.6896e+06	1.73423e+06	1.70757e+06	1.38827e+06	2.27233e+06	1.84243e+06	1.75637e+06	1.80589e+06	3.0728e+06
Q8A5K0	Carboxyl-terminal protease OS=Bacteroides thetaiotaomicron (strain ATCC 29148 / DSM 2079 / NCTC 10582 / E50 / VPI-5482) OX=226186 GN=BT_2239 PE=4 SV=1	1.19852e+06	1.29317e+06	779350	1.48266e+06	1.5347e+06	2.67382e+06	2.48213e+06	3.28085e+06	2927593	1.75743e+06
Q8A2D9	Glycoside transferase family 2 OS=Bacteroides thetaiotaomicron (strain ATCC 29148 / DSM 2079 / NCTC 10582 / E50 / VPI-5482) OX=226186 GN=BT_3366 PE=4 SV=1	3.64363e+06	2.89967e+06	3.28337e+06	3.32732e+06	1.90148e+06	1.4825e+06	2.00745e+06	2.25055e+06	2.35607e+06	2.92541e+06
Q8A6P2	Biotin synthase OS=Bacteroides thetaiotaomicron (strain ATCC 29148 / DSM 2079 / NCTC 10582 / E50 / VPI-5482) OX=226186 GN=BT_1835 PE=4 SV=1	561816	170700	313983	330363	203828	283745	164533	41300.6	286984	858479
Q8A0P2	Putative methyltransferase OS=Bacteroides thetaiotaomicron (strain ATCC 29148 / DSM 2079 / NCTC 10582 / E50 / VPI-5482) OX=226186 GN=BT_3979 PE=4 SV=1	3349792	3.39937e+06	3.17496e+06	3.22282e+06	2.95861e+06	3.59924e+06	3.90789e+06	2.38276e+06	2.85473e+06	4.10963e+06
Q8A0Y1	Exodeoxyribonuclease 7 large subunit OS=Bacteroides thetaiotaomicron (strain ATCC 29148 / DSM 2079 / NCTC 10582 / E50 / VPI-5482) OX=226186 GN=BT_3890 PE=3 SV=1	3.17377e+06	2.29359e+06	2.5315e+06	2.52699e+06	2.42335e+06	2.64388e+06	3.14147e+06	1.98233e+06	2.81753e+06	3.31882e+06
Q8A854	Phosphate-specific transport system accessory protein PhoU OS=Bacteroides thetaiotaomicron (strain ATCC 29148 / DSM 2079 / NCTC 10582 / E50 / VPI-5482) OX=226186 GN=BT_1320 PE=3 SV=1	470547	520513	226279	418355	366806	653480	432970	613978	715430	372136
Q8A9A9	VWFA domain-containing protein OS=Bacteroides thetaiotaomicron (strain ATCC 29148 / DSM 2079 / NCTC 10582 / E50 / VPI-5482) OX=226186 GN=BT_0906 PE=1 SV=1	1.02831e+07	1.03873e+07	8.4689e+06	8.5564e+06	1.11076e+07	6.93561e+06	6.60833e+06	7.4295e+06	9.52941e+06	4.48692e+06
Q89YR5	Putative K+ uptake system protein OS=Bacteroides thetaiotaomicron (strain ATCC 29148 / DSM 2079 / NCTC 10582 / E50 / VPI-5482) OX=226186 GN=BT_4666 PE=4 SV=1	802973	2.01665e+06	626521	881981	1.33259e+06	2.08128e+06	1.75034e+06	1.46532e+06	2.44378e+06	590546
Q8A792	Mannose-1-phosphate guanyltransferase OS=Bacteroides thetaiotaomicron (strain ATCC 29148 / DSM 2079 / NCTC 10582 / E50 / VPI-5482) OX=226186 GN=BT_1633 PE=4 SV=1	1.25804e+06	1.36064e+06	1.39849e+06	1.29773e+06	963816	1.3718e+06	1.23607e+06	1.2893e+06	973940	1.00422e+06
Q8A8E7	6-phosphogluconolactonase OS=Bacteroides thetaiotaomicron (strain ATCC 29148 / DSM 2079 / NCTC 10582 / E50 / VPI-5482) OX=226186 GN=pgl PE=3 SV=1	6.32286e+06	7.08713e+06	4.28295e+06	5.92848e+06	4.16823e+06	1.029e+07	6.6892e+06	5.62764e+06	1.03298e+07	7.84308e+06
Q8A2H4	SusD homolog OS=Bacteroides thetaiotaomicron (strain ATCC 29148 / DSM 2079 / NCTC 10582 / E50 / VPI-5482) OX=226186 GN=BT_3331 PE=3 SV=1	2.07278e+06	1.78177e+06	2.10425e+06	1.33681e+06	1.17603e+06	845703	1.00185e+06	820210	953845	1.05243e+06
Q8A9A4	Putative integration host factor IHF alpha subunit OS=Bacteroides thetaiotaomicron (strain ATCC 29148 / DSM 2079 / NCTC 10582 / E50 / VPI-5482) OX=226186 GN=BT_0911 PE=3 SV=1	7.12911e+07	6.19926e+07	6.26479e+07	6.32677e+07	5.7245e+07	8.15499e+07	6.39413e+07	7.46418e+07	8.13713e+07	9.20296e+07
Q8A956	Putative TonB-dependent outer membrane receptor OS=Bacteroides thetaiotaomicron (strain ATCC 29148 / DSM 2079 / NCTC 10582 / E50 / VPI-5482) OX=226186 GN=BT_0961 PE=4 SV=1	4.12493e+06	3.35158e+06	3.11967e+06	3.65519e+06	3.16365e+06	1.91624e+06	2.03892e+06	1.81388e+06	2.56127e+06	2.46458e+06
Q8A2B4	Ribonuclease H OS=Bacteroides thetaiotaomicron (strain ATCC 29148 / DSM 2079 / NCTC 10582 / E50 / VPI-5482) OX=226186 GN=BT_3391 PE=3 SV=1	3.50945e+06	3.40035e+06	3.11938e+06	3.10877e+06	2.43152e+06	2.6596e+06	2262679	1.66322e+06	2.52347e+06	2.63739e+06
Q8A9G7	Uncharacterized protein OS=Bacteroides thetaiotaomicron (strain ATCC 29148 / DSM 2079 / NCTC 10582 / E50 / VPI-5482) OX=226186 GN=BT_0848 PE=4 SV=1	6.39133e+06	6.75143e+06	5.95827e+06	6.39073e+06	5.70993e+06	5.84972e+06	5.61971e+06	4.15639e+06	5.26591e+06	5.85407e+06
Q8A2P0	D-aminoacyl-tRNA deacylase OS=Bacteroides thetaiotaomicron (strain ATCC 29148 / DSM 2079 / NCTC 10582 / E50 / VPI-5482) OX=226186 GN=dtd PE=3 SV=1	7.68234e+06	6.93088e+06	5.73679e+06	5.14484e+06	4.75793e+06	6.81546e+06	5.27695e+06	5.93026e+06	7.6235e+06	7.98204e+06
Q8A2Y7	Putative Fe-S oxidoreductase OS=Bacteroides thetaiotaomicron (strain ATCC 29148 / DSM 2079 / NCTC 10582 / E50 / VPI-5482) OX=226186 GN=BT_3168 PE=4 SV=1	1.26187e+06	1.71907e+06	1.89036e+06	1.05633e+06	1.53605e+06	3.14914e+06	1.48059e+06	2.14638e+06	3.12412e+06	1.28781e+06
Q8A6M1	Uncharacterized protein OS=Bacteroides thetaiotaomicron (strain ATCC 29148 / DSM 2079 / NCTC 10582 / E50 / VPI-5482) OX=226186 GN=BT_1856 PE=4 SV=1	749075	1.07157e+06	773838	546948	757940	697039	282137	524711	1.07848e+06	306645
Q8A5S2	Two-component system sensor histidine kinase OS=Bacteroides thetaiotaomicron (strain ATCC 29148 / DSM 2079 / NCTC 10582 / E50 / VPI-5482) OX=226186 GN=BT_2166 PE=4 SV=1	3.73531e+06	4.05666e+06	3.30521e+06	3.36972e+06	2.64037e+06	1.07933e+06	959651	896150	2.13572e+06	971665
Q8A653	SusD homolog OS=Bacteroides thetaiotaomicron (strain ATCC 29148 / DSM 2079 / NCTC 10582 / E50 / VPI-5482) OX=226186 GN=BT_2033 PE=1 SV=1	1.54729e+06	783332	835105	1.05124e+06	487999	1.0488e+06	965581	653653	658635	1.86857e+06
Q8A9X3	Putative calcineurin superfamily phosphohydrolase OS=Bacteroides thetaiotaomicron (strain ATCC 29148 / DSM 2079 / NCTC 10582 / E50 / VPI-5482) OX=226186 GN=BT_0692 PE=4 SV=1	4.66178e+06	4.77538e+06	4.06498e+06	4.03403e+06	3.89104e+06	630717	561889	410386	335010	617264
Q8A2I0	Uncharacterized protein OS=Bacteroides thetaiotaomicron (strain ATCC 29148 / DSM 2079 / NCTC 10582 / E50 / VPI-5482) OX=226186 GN=BT_3325 PE=4 SV=1	1.13452e+07	8.55514e+06	9.42113e+06	8.97498e+06	8.36577e+06	8.22258e+06	6.91904e+06	7.29488e+06	7.92705e+06	1.08271e+07
Q8A7I8	ABC transporter permease OS=Bacteroides thetaiotaomicron (strain ATCC 29148 / DSM 2079 / NCTC 10582 / E50 / VPI-5482) OX=226186 GN=BT_1536 PE=4 SV=1	2.49022e+06	2.35599e+06	3.1038e+06	1.43748e+06	1.65053e+06	291436	356016	450609	712159	532203
Q8A553	Putative transport protein OS=Bacteroides thetaiotaomicron (strain ATCC 29148 / DSM 2079 / NCTC 10582 / E50 / VPI-5482) OX=226186 GN=BT_2389 PE=3 SV=1	3.56968e+06	4.80814e+06	5.10819e+06	3.62865e+06	4.80137e+06	5.52422e+06	3.35646e+06	4.91478e+06	7.49997e+06	4.63703e+06
Q8A6R5	Uncharacterized protein OS=Bacteroides thetaiotaomicron (strain ATCC 29148 / DSM 2079 / NCTC 10582 / E50 / VPI-5482) OX=226186 GN=BT_1811 PE=4 SV=1	5.35689e+06	4986118	4.47489e+06	4.71949e+06	4.57791e+06	3.30221e+06	3.11145e+06	2.56056e+06	3.75567e+06	4.73353e+06
Q8A4J3	Uncharacterized protein OS=Bacteroides thetaiotaomicron (strain ATCC 29148 / DSM 2079 / NCTC 10582 / E50 / VPI-5482) OX=226186 GN=BT_2606 PE=4 SV=1	3.11581e+06	3.54038e+06	3.08155e+06	2.47649e+06	3.68712e+06	5.17079e+06	4.61984e+06	4.35841e+06	5.45276e+06	3.00441e+06
Q8AB62	5-methyltetrahydrofolate--homocysteine methyltransferase or methionine synthase OS=Bacteroides thetaiotaomicron (strain ATCC 29148 / DSM 2079 / NCTC 10582 / E50 / VPI-5482) OX=226186 GN=BT_0249 PE=4 SV=1	9.24793e+06	8.08444e+06	8.11753e+06	7.01299e+06	5.72156e+06	8.40379e+06	9.36313e+06	8.72465e+06	1.03911e+07	1.20964e+07
Q8A557	Uncharacterized protein OS=Bacteroides thetaiotaomicron (strain ATCC 29148 / DSM 2079 / NCTC 10582 / E50 / VPI-5482) OX=226186 GN=BT_2385 PE=4 SV=1	182795	417847	728889	793490	665484	582333	242959	496579	604290	336906
Q8A6D1	Putative TonB-linked outer membrane receptor OS=Bacteroides thetaiotaomicron (strain ATCC 29148 / DSM 2079 / NCTC 10582 / E50 / VPI-5482) OX=226186 GN=BT_1953 PE=4 SV=1	24487.5	527686	151552	60159.1	377714	627603	285398	342945	878355	43838.4
Q8A7E9	Putative dehydrogenase OS=Bacteroides thetaiotaomicron (strain ATCC 29148 / DSM 2079 / NCTC 10582 / E50 / VPI-5482) OX=226186 GN=BT_1575 PE=3 SV=1	388023	854411	640787	548261	557590	1.39249e+06	1.52703e+06	1.36873e+06	1.40493e+06	1.88964e+06
Q8A1P1	Uncharacterized protein OS=Bacteroides thetaiotaomicron (strain ATCC 29148 / DSM 2079 / NCTC 10582 / E50 / VPI-5482) OX=226186 GN=BT_3618 PE=1 SV=1	1.35951e+06	1.20262e+06	1.21138e+06	1.27824e+06	1.11271e+06	1.36239e+06	1.06807e+06	700535	1.62309e+06	739652
Q8A4B5	Outer membrane efflux protein OS=Bacteroides thetaiotaomicron (strain ATCC 29148 / DSM 2079 / NCTC 10582 / E50 / VPI-5482) OX=226186 GN=BT_2688 PE=3 SV=1	5.64891e+06	4.78612e+06	3.69086e+06	3.86481e+06	5.06107e+06	664699	NA	1.22144e+06	1.19067e+06	134773
Q8A2I8	Uncharacterized protein OS=Bacteroides thetaiotaomicron (strain ATCC 29148 / DSM 2079 / NCTC 10582 / E50 / VPI-5482) OX=226186 GN=BT_3317 PE=4 SV=1	2.94027e+06	2.70382e+06	2.84568e+06	2.12198e+06	2.07614e+06	2.7966e+06	2.42856e+06	2.06334e+06	3.14226e+06	2.63361e+06
Q8A7D0	Putative ferredoxin OS=Bacteroides thetaiotaomicron (strain ATCC 29148 / DSM 2079 / NCTC 10582 / E50 / VPI-5482) OX=226186 GN=BT_1594 PE=4 SV=1	1.42121e+06	1.17078e+06	2.01775e+06	1.70999e+06	1690950	1.72885e+06	1.66408e+06	1.57958e+06	1.87761e+06	2.18094e+06
Q8A3F4	T5orf172 domain-containing protein OS=Bacteroides thetaiotaomicron (strain ATCC 29148 / DSM 2079 / NCTC 10582 / E50 / VPI-5482) OX=226186 GN=BT_3000 PE=4 SV=1	3.92142e+06	3.44474e+06	3.10646e+06	3.37669e+06	2.7381e+06	4.04258e+06	5.32527e+06	3.38923e+06	4.17801e+06	5.01929e+06
Q8A096	Elp3 domain-containing protein OS=Bacteroides thetaiotaomicron (strain ATCC 29148 / DSM 2079 / NCTC 10582 / E50 / VPI-5482) OX=226186 GN=BT_4125 PE=4 SV=1	3.4868e+06	2.47699e+06	3.01034e+06	2.296e+06	2.28156e+06	2.4739e+06	2.1863e+06	1.97392e+06	2.22114e+06	2.04834e+06
Q8A337	Phosphatidylglycerol--prolipoprotein diacylglyceryl transferase OS=Bacteroides thetaiotaomicron (strain ATCC 29148 / DSM 2079 / NCTC 10582 / E50 / VPI-5482) OX=226186 GN=lgt PE=3 SV=1	751623	859792	198957	240784	185444	766075	207430	263033	1.16127e+06	120816
Q8A0I6	HTH cro/C1-type domain-containing protein OS=Bacteroides thetaiotaomicron (strain ATCC 29148 / DSM 2079 / NCTC 10582 / E50 / VPI-5482) OX=226186 GN=BT_4035 PE=4 SV=1	843679	2.01572e+06	1.23886e+06	787340	752126	2.07575e+06	877226	771477	1.19798e+06	1.41696e+06
Q8A8W3	DNA helicase OS=Bacteroides thetaiotaomicron (strain ATCC 29148 / DSM 2079 / NCTC 10582 / E50 / VPI-5482) OX=226186 GN=BT_1054 PE=4 SV=1	541844	1.00185e+06	698956	1.88084e+06	770711	1.02558e+06	546077	567158	1.3418e+06	308869
Q8A7Z8	Putative ATP-binding protein involved in cell division OS=Bacteroides thetaiotaomicron (strain ATCC 29148 / DSM 2079 / NCTC 10582 / E50 / VPI-5482) OX=226186 GN=BT_1376 PE=4 SV=1	2.12014e+06	1.61106e+06	1.75023e+06	1.60329e+06	1.75468e+06	2.11966e+06	1.83519e+06	1.21818e+06	2.06794e+06	1.67849e+06
Q8A6J5	Oxidoreductase, 2-nitropropane dioxygenase family OS=Bacteroides thetaiotaomicron (strain ATCC 29148 / DSM 2079 / NCTC 10582 / E50 / VPI-5482) OX=226186 GN=BT_1886 PE=4 SV=1	576538	417805	130135	139275	347570	33249.1	11219.4	12618.5	32198.3	2437.25
Q8A2M2	Endoribonuclease YbeY OS=Bacteroides thetaiotaomicron (strain ATCC 29148 / DSM 2079 / NCTC 10582 / E50 / VPI-5482) OX=226186 GN=ybeY PE=3 SV=1	1.79455e+06	1.41212e+06	1.73367e+06	1.43544e+06	1.52714e+06	1607356	1.87547e+06	1.46702e+06	1.91556e+06	2.14948e+06
Q8A0G9	Putative ABC transporter ATP-binding protein OS=Bacteroides thetaiotaomicron (strain ATCC 29148 / DSM 2079 / NCTC 10582 / E50 / VPI-5482) OX=226186 GN=BT_4052 PE=4 SV=1	7.24781e+06	6.76873e+06	7.01484e+06	6.2807e+06	5.33563e+06	6.32961e+06	6.81059e+06	5.69788e+06	7.20876e+06	6.65931e+06
Q8A293	Ribonuclease HII OS=Bacteroides thetaiotaomicron (strain ATCC 29148 / DSM 2079 / NCTC 10582 / E50 / VPI-5482) OX=226186 GN=rnhB PE=3 SV=1	149589	164925	518881	673386	883311	1.2823e+06	834071	943162	1720319	1.19822e+06
Q8A2F7	Putative unsaturated glucuronyl hydrolase OS=Bacteroides thetaiotaomicron (strain ATCC 29148 / DSM 2079 / NCTC 10582 / E50 / VPI-5482) OX=226186 GN=BT_3348 PE=4 SV=1	3.49727e+06	3.69067e+06	3.26811e+06	3.01825e+06	2.71053e+06	2.13155e+06	1.85605e+06	1.86987e+06	2.39506e+06	2.29549e+06
Q8A6F3	Site-specific DNA-methyltransferase (adenine-specific) OS=Bacteroides thetaiotaomicron (strain ATCC 29148 / DSM 2079 / NCTC 10582 / E50 / VPI-5482) OX=226186 GN=BT_1931 PE=3 SV=1	1.54807e+06	1.09532e+06	1.39101e+06	951958	346294	1.46982e+06	1.20694e+06	1.17673e+06	1542330	1.28724e+06
Q8A4Q4	Riboflavin biosynthesis protein OS=Bacteroides thetaiotaomicron (strain ATCC 29148 / DSM 2079 / NCTC 10582 / E50 / VPI-5482) OX=226186 GN=BT_2543 PE=3 SV=1	2.04262e+06	1.57517e+06	1.67797e+06	1.31093e+06	580045	1.62188e+06	1.50118e+06	1.36631e+06	1.83932e+06	1.37844e+06
Q8A157	Putative endothelin-converting enzyme OS=Bacteroides thetaiotaomicron (strain ATCC 29148 / DSM 2079 / NCTC 10582 / E50 / VPI-5482) OX=226186 GN=BT_3810 PE=4 SV=1	5.88442e+06	6.90413e+06	5.75923e+06	6.47317e+06	7.86436e+06	6.65127e+06	6.18258e+06	8.2885e+06	8.0394e+06	5.37842e+06
Q8A0V1	Putative tansport related protein OS=Bacteroides thetaiotaomicron (strain ATCC 29148 / DSM 2079 / NCTC 10582 / E50 / VPI-5482) OX=226186 GN=BT_3920 PE=3 SV=1	3.56621e+06	2.62874e+06	2.62261e+06	3.24005e+06	3.87258e+06	2770700	3.09261e+06	3.7219e+06	3.05577e+06	3.1146e+06
Q8A8G9	LemA protein OS=Bacteroides thetaiotaomicron (strain ATCC 29148 / DSM 2079 / NCTC 10582 / E50 / VPI-5482) OX=226186 GN=BT_1198 PE=3 SV=1	1.65532e+06	2.28868e+06	1.49011e+06	1.45844e+06	2.22894e+06	1.66759e+06	1.06537e+06	1.19424e+06	2.19422e+06	1.26774e+06
Q8A6D4	Fe3+ ABC transporter, ATP-binding protein OS=Bacteroides thetaiotaomicron (strain ATCC 29148 / DSM 2079 / NCTC 10582 / E50 / VPI-5482) OX=226186 GN=BT_1950 PE=4 SV=1	1.40584e+06	2.25298e+06	848747	1.62844e+06	1.21878e+06	1.26465e+06	2.82661e+06	1.0441e+06	2.32986e+06	1.52674e+06
Q8A7T0	Putative biotin synthesis-related fusion protein OS=Bacteroides thetaiotaomicron (strain ATCC 29148 / DSM 2079 / NCTC 10582 / E50 / VPI-5482) OX=226186 GN=BT_1444 PE=4 SV=1	1.93771e+06	2.51449e+06	713296	1.30096e+06	1.1896e+06	642568	573514	605481	918162	650940
Q8A5B1	Uncharacterized protein OS=Bacteroides thetaiotaomicron (strain ATCC 29148 / DSM 2079 / NCTC 10582 / E50 / VPI-5482) OX=226186 GN=BT_2328 PE=4 SV=1	770226	925085	446060	439294	291770	820490	733189	310347	786006	524001
Q8ABE3	Uncharacterized protein OS=Bacteroides thetaiotaomicron (strain ATCC 29148 / DSM 2079 / NCTC 10582 / E50 / VPI-5482) OX=226186 GN=BT_0167 PE=4 SV=1	883408	995806	488280	421205	438247	1.47001e+06	885213	702089	2.16298e+06	939472
Q8A3I2	Putative methyltransferase OS=Bacteroides thetaiotaomicron (strain ATCC 29148 / DSM 2079 / NCTC 10582 / E50 / VPI-5482) OX=226186 GN=BT_2972 PE=1 SV=1	402264	729601	94729.9	194628	172249	610320	335606	471145	872075	261481
Q8A2M9	Uncharacterized protein OS=Bacteroides thetaiotaomicron (strain ATCC 29148 / DSM 2079 / NCTC 10582 / E50 / VPI-5482) OX=226186 GN=BT_3276 PE=4 SV=1	1.1825e+06	1.58783e+06	1.20528e+06	1.30479e+06	1.27904e+06	2.16218e+06	1.10903e+06	1.16604e+06	1.82387e+06	1.37111e+06
Q89ZI8	Purine nucleoside phosphorylase BT_4389 OS=Bacteroides thetaiotaomicron (strain ATCC 29148 / DSM 2079 / NCTC 10582 / E50 / VPI-5482) OX=226186 GN=BT_4389 PE=1 SV=1	1.36463e+06	612925	846751	994182	810237	1.15632e+06	978562	838077	1.14977e+06	1.64584e+06
Q8AA37	TSCPD domain-containing protein OS=Bacteroides thetaiotaomicron (strain ATCC 29148 / DSM 2079 / NCTC 10582 / E50 / VPI-5482) OX=226186 GN=BT_0628 PE=4 SV=1	3.09679e+06	2.04453e+06	3.18631e+06	2.594e+06	2.54561e+06	2.5704e+06	3.16768e+06	2.37045e+06	2.42834e+06	3.04455e+06
Q8A613	Putative helicase OS=Bacteroides thetaiotaomicron (strain ATCC 29148 / DSM 2079 / NCTC 10582 / E50 / VPI-5482) OX=226186 GN=BT_2073 PE=4 SV=1	2.82233e+06	4.00195e+06	2.92476e+06	2.37492e+06	2.68517e+06	359583	1.08429e+06	1.07716e+06	1.87339e+06	806646
Q8ABC3	Possible Pirin family protein OS=Bacteroides thetaiotaomicron (strain ATCC 29148 / DSM 2079 / NCTC 10582 / E50 / VPI-5482) OX=226186 GN=BT_0187 PE=3 SV=1	2.62238e+06	2.68765e+06	3.00272e+06	1.81793e+06	1.32241e+06	2.29106e+06	1.94719e+06	1.36426e+06	2.24679e+06	2.35801e+06
Q8A532	Putative collagenase OS=Bacteroides thetaiotaomicron (strain ATCC 29148 / DSM 2079 / NCTC 10582 / E50 / VPI-5482) OX=226186 GN=BT_2412 PE=4 SV=1	3.21867e+07	2.49214e+07	2.61591e+07	2.74924e+07	2.01396e+07	2.69359e+07	2.9343e+07	2.32773e+07	2.74385e+07	4.73697e+07
Q8A7S4	Propionyl-CoA carboxylase beta chain OS=Bacteroides thetaiotaomicron (strain ATCC 29148 / DSM 2079 / NCTC 10582 / E50 / VPI-5482) OX=226186 GN=BT_1450 PE=4 SV=1	1.97153e+06	2.32292e+06	1.99207e+06	1.79932e+06	1.50974e+06	1012592	1.19387e+06	672395	1.30403e+06	1.05607e+06
Q8A2L6	Dipeptidyl-peptidase OS=Bacteroides thetaiotaomicron (strain ATCC 29148 / DSM 2079 / NCTC 10582 / E50 / VPI-5482) OX=226186 GN=BT_3289 PE=3 SV=1	1.69943e+06	1.24024e+06	1.90332e+06	2.94154e+06	2.31163e+06	1.33185e+06	1.23287e+06	388085	1.72615e+06	807909
Q8AAE6	Protein with hemerythrin HHE cation binding region OS=Bacteroides thetaiotaomicron (strain ATCC 29148 / DSM 2079 / NCTC 10582 / E50 / VPI-5482) OX=226186 GN=BT_0519 PE=4 SV=1	770450	1.32339e+06	1.10271e+06	944115	763387	953970	654380	370707	1.21488e+06	337440
Q8A454	Putative membrane-associated HD superfamily hydrolase OS=Bacteroides thetaiotaomicron (strain ATCC 29148 / DSM 2079 / NCTC 10582 / E50 / VPI-5482) OX=226186 GN=BT_2749 PE=4 SV=1	1.3425e+06	765927	865591	1.41727e+06	1.09613e+06	393760	391347	405017	836487	412847
Q8A2E5	Phosphoribosylglycinamide formyltransferase OS=Bacteroides thetaiotaomicron (strain ATCC 29148 / DSM 2079 / NCTC 10582 / E50 / VPI-5482) OX=226186 GN=purN PE=3 SV=1	1.88729e+06	1.36834e+06	1.29897e+06	1.55277e+06	921213	2.11643e+06	2.09103e+06	1.35898e+06	1.24004e+06	2.01523e+06
Q89ZY2	Uncharacterized protein OS=Bacteroides thetaiotaomicron (strain ATCC 29148 / DSM 2079 / NCTC 10582 / E50 / VPI-5482) OX=226186 GN=BT_4239 PE=4 SV=1	5.37859e+06	5.66857e+06	4.48041e+06	5.92899e+06	5.42611e+06	5.26746e+06	5314699	4.51718e+06	4.75847e+06	4.44261e+06
Q8A0M5	Putative peptidase OS=Bacteroides thetaiotaomicron (strain ATCC 29148 / DSM 2079 / NCTC 10582 / E50 / VPI-5482) OX=226186 GN=BT_3996 PE=4 SV=1	4.28594e+06	3.56914e+06	3.60238e+06	4.24557e+06	3.36931e+06	4.46438e+06	4.63998e+06	3.91645e+06	4.33677e+06	4.89631e+06
Q8AB00	2-oxoisovalerate dehydrogenase beta subunit OS=Bacteroides thetaiotaomicron (strain ATCC 29148 / DSM 2079 / NCTC 10582 / E50 / VPI-5482) OX=226186 GN=BT_0312 PE=4 SV=1	2.6508e+06	2.51426e+06	2.614e+06	1.91129e+06	1.65234e+06	1.66438e+06	1.58239e+06	1.44506e+06	1.73178e+06	1.20081e+06
Q89ZT3	AAA-ATPase_like domain-containing protein OS=Bacteroides thetaiotaomicron (strain ATCC 29148 / DSM 2079 / NCTC 10582 / E50 / VPI-5482) OX=226186 GN=BT_4293 PE=4 SV=1	4.22936e+06	3.38665e+06	3.25765e+06	3.32027e+06	3.00324e+06	4.43431e+06	4.26666e+06	3.99896e+06	4.38496e+06	5.36303e+06
Q8A408	Uncharacterized protein OS=Bacteroides thetaiotaomicron (strain ATCC 29148 / DSM 2079 / NCTC 10582 / E50 / VPI-5482) OX=226186 GN=BT_2796 PE=4 SV=1	2.20253e+06	2.35048e+06	2.13416e+06	2.35687e+06	2.20361e+06	2.00782e+06	1.66125e+06	2.15648e+06	2.30082e+06	640726
Q89Z24	NAD-dependent epimerase/dehydratase OS=Bacteroides thetaiotaomicron (strain ATCC 29148 / DSM 2079 / NCTC 10582 / E50 / VPI-5482) OX=226186 GN=BT_4553 PE=1 SV=1	1.53897e+06	1.51922e+06	1.65142e+06	1.64447e+06	2.02441e+06	2.58953e+06	1.65542e+06	1.36365e+06	2.6333e+06	1.58137e+06
Q8A2E1	Tyrosine protein kinase, active site OS=Bacteroides thetaiotaomicron (strain ATCC 29148 / DSM 2079 / NCTC 10582 / E50 / VPI-5482) OX=226186 GN=BT_3364 PE=4 SV=1	2.25402e+06	1.89955e+06	1.14706e+06	1.69773e+06	1.53787e+06	1.65701e+06	1.12459e+06	1.91574e+06	1.85805e+06	1.15812e+06
Q8A093	Putative Sua5/yciO/yrdC family protein OS=Bacteroides thetaiotaomicron (strain ATCC 29148 / DSM 2079 / NCTC 10582 / E50 / VPI-5482) OX=226186 GN=BT_4128 PE=4 SV=1	464291	1.49693e+06	703138	539960	1.05371e+06	1064359	1.2349e+06	922002	1.08733e+06	736163
Q8A0U1	SPOR domain-containing protein OS=Bacteroides thetaiotaomicron (strain ATCC 29148 / DSM 2079 / NCTC 10582 / E50 / VPI-5482) OX=226186 GN=BT_3930 PE=4 SV=1	4.56156e+06	4.62407e+06	5.41325e+06	3.75487e+06	3.47148e+06	4.8361e+06	5.31565e+06	4.28994e+06	8.06133e+06	5.52164e+06
Q8A9N9	DUF362 domain-containing protein OS=Bacteroides thetaiotaomicron (strain ATCC 29148 / DSM 2079 / NCTC 10582 / E50 / VPI-5482) OX=226186 GN=BT_0776 PE=4 SV=1	1.76461e+06	2.04075e+06	2.11567e+06	1.53038e+06	1.35646e+06	2.9292e+06	3.3788e+06	2.165e+06	3.41686e+06	3689536
Q8A1E7	Glutamate 5-kinase OS=Bacteroides thetaiotaomicron (strain ATCC 29148 / DSM 2079 / NCTC 10582 / E50 / VPI-5482) OX=226186 GN=proB PE=3 SV=1	2.51285e+06	2.0618e+06	2.21754e+06	1.61356e+06	1.65037e+06	2.02572e+06	2.52534e+06	1.38538e+06	1.92877e+06	3.14164e+06
Q8A7Z2	Putative protease OS=Bacteroides thetaiotaomicron (strain ATCC 29148 / DSM 2079 / NCTC 10582 / E50 / VPI-5482) OX=226186 GN=BT_1382 PE=4 SV=1	4.21828e+06	5.83396e+06	3.11935e+06	3161913	5.1987e+06	4.51291e+06	5.59855e+06	4.3219e+06	5.02745e+06	2.50325e+06
Q8A5T9	7,8-dihydroneopterin aldolase OS=Bacteroides thetaiotaomicron (strain ATCC 29148 / DSM 2079 / NCTC 10582 / E50 / VPI-5482) OX=226186 GN=BT_2149 PE=3 SV=1	673613	1.30835e+06	880862	671360	1.5717e+06	1.69783e+06	367509	1.1754e+06	1.20656e+06	978051
Q8A031	Putative S-adenosylmethionine-dependent methytransferase OS=Bacteroides thetaiotaomicron (strain ATCC 29148 / DSM 2079 / NCTC 10582 / E50 / VPI-5482) OX=226186 GN=BT_4190 PE=1 SV=1	1.94816e+06	3.57798e+06	1.91177e+06	1.36062e+06	1.26051e+06	1.62045e+06	2.63222e+06	1.39802e+06	1.89041e+06	3.04211e+06
Q8A0C3	Trk system potassium uptake protein TrkA OS=Bacteroides thetaiotaomicron (strain ATCC 29148 / DSM 2079 / NCTC 10582 / E50 / VPI-5482) OX=226186 GN=BT_4098 PE=4 SV=1	2.27889e+06	1.94809e+06	1.86251e+06	1.77748e+06	1.80116e+06	2.06601e+06	1.93728e+06	2.07236e+06	2.05297e+06	2.88416e+06
Q8A754	Endonuclease III OS=Bacteroides thetaiotaomicron (strain ATCC 29148 / DSM 2079 / NCTC 10582 / E50 / VPI-5482) OX=226186 GN=nth PE=3 SV=1	7.328e+06	6.03334e+06	6.71908e+06	5.94191e+06	6.18938e+06	3.45336e+06	4.56147e+06	4.49202e+06	5519617	4.38203e+06
Q8AA65	Nucleotide sugar epimerase OS=Bacteroides thetaiotaomicron (strain ATCC 29148 / DSM 2079 / NCTC 10582 / E50 / VPI-5482) OX=226186 GN=BT_0600 PE=4 SV=1	37033.9	531816	28417.3	53500.6	147669	382194	96585.1	201958	572791	58338
Q8A8E9	Abasic site processing protein OS=Bacteroides thetaiotaomicron (strain ATCC 29148 / DSM 2079 / NCTC 10582 / E50 / VPI-5482) OX=226186 GN=BT_1218 PE=1 SV=1	558736	2.16401e+06	1.0341e+06	1.05881e+06	1.07022e+06	1.36492e+06	1.18694e+06	1.3112e+06	1.45616e+06	582592
Q8A4C0	Putative periplasmic protein OS=Bacteroides thetaiotaomicron (strain ATCC 29148 / DSM 2079 / NCTC 10582 / E50 / VPI-5482) OX=226186 GN=BT_2683 PE=4 SV=1	1.971e+06	1.74868e+06	1.39619e+06	1.14972e+06	1.73058e+06	1.67737e+06	1.32374e+06	1.79295e+06	1.72821e+06	1.23192e+06
Q8A6U4	Putative phosphoesterase OS=Bacteroides thetaiotaomicron (strain ATCC 29148 / DSM 2079 / NCTC 10582 / E50 / VPI-5482) OX=226186 GN=BT_1782 PE=4 SV=1	1.95145e+06	1.8498e+06	1.77808e+06	1.65574e+06	1.59748e+06	1.6341e+06	1.36158e+06	1.09791e+06	1.30606e+06	1.26226e+06
Q8AAE8	Flavodoxin OS=Bacteroides thetaiotaomicron (strain ATCC 29148 / DSM 2079 / NCTC 10582 / E50 / VPI-5482) OX=226186 GN=BT_0517 PE=3 SV=1	1.72963e+06	1.54431e+06	1.15697e+06	782678	1.23628e+06	1.59948e+06	2.06189e+06	1.03679e+06	1.26864e+06	1.90157e+06
Q8A6J4	Putative RNA-binding protein rbpA OS=Bacteroides thetaiotaomicron (strain ATCC 29148 / DSM 2079 / NCTC 10582 / E50 / VPI-5482) OX=226186 GN=BT_1887 PE=4 SV=1	2.4077e+07	1.67641e+07	1.69389e+07	19945049	14138521	4.97226e+06	5.60384e+06	3951620	3.89776e+06	4.78677e+06
Q8A8L9	Putative NADH dehydrogenase/NAD(P)H nitroreductase OS=Bacteroides thetaiotaomicron (strain ATCC 29148 / DSM 2079 / NCTC 10582 / E50 / VPI-5482) OX=226186 GN=BT_1148 PE=4 SV=1	6.60959e+06	5.52299e+06	6.78735e+06	6.46196e+06	5.20686e+06	7.3926e+06	8.36213e+06	8.24605e+06	6.72608e+06	7.61264e+06
Q8A7Y1	4-carboxymuconolactone decarboxylase OS=Bacteroides thetaiotaomicron (strain ATCC 29148 / DSM 2079 / NCTC 10582 / E50 / VPI-5482) OX=226186 GN=BT_1393 PE=4 SV=1	2.55548e+06	1.90437e+06	2.06859e+06	1.99868e+06	1.61159e+06	1.515e+06	1.3467e+06	1.43556e+06	2.08087e+06	1.55422e+06
Q8A2H1	Two-component system sensor histidine kinase/response regulator, hybrid (One-component system) OS=Bacteroides thetaiotaomicron (strain ATCC 29148 / DSM 2079 / NCTC 10582 / E50 / VPI-5482) OX=226186 GN=BT_3334 PE=4 SV=1	1.38163e+06	745241	1.07353e+06	1.08256e+06	576064	224857	501432	534800	1.00321e+06	975073
Q8A0W2	Uncharacterized protein OS=Bacteroides thetaiotaomicron (strain ATCC 29148 / DSM 2079 / NCTC 10582 / E50 / VPI-5482) OX=226186 GN=BT_3909 PE=4 SV=1	2.55241e+06	2700110	1.58033e+06	2.24137e+06	1.11531e+06	992927	203120	343956	1.0326e+06	617021
Q8A6D5	Uncharacterized protein OS=Bacteroides thetaiotaomicron (strain ATCC 29148 / DSM 2079 / NCTC 10582 / E50 / VPI-5482) OX=226186 GN=BT_1949 PE=4 SV=1	1.81074e+06	1.50118e+06	1.50569e+06	1.56875e+06	1429058	1.94487e+06	2.00354e+06	1.74027e+06	2.07298e+06	1.96146e+06
Q8A023	Putative regulatory protein OS=Bacteroides thetaiotaomicron (strain ATCC 29148 / DSM 2079 / NCTC 10582 / E50 / VPI-5482) OX=226186 GN=BT_4198 PE=3 SV=1	3.49041e+06	1.06668e+07	3.5703e+06	2.17461e+06	10259049	15894720	8.97459e+06	1.69662e+07	1.6789e+07	5.31295e+06
Q8AA45	Ion-translocating oxidoreductase complex subunit G OS=Bacteroides thetaiotaomicron (strain ATCC 29148 / DSM 2079 / NCTC 10582 / E50 / VPI-5482) OX=226186 GN=rnfG PE=3 SV=1	1.757e+06	1.60523e+06	1.57789e+06	1.40339e+06	1.44687e+06	1.64982e+06	1.49626e+06	1.46041e+06	1.53559e+06	1.86637e+06
Q8A5U5	Chromosomal replication initiator protein DnaA OS=Bacteroides thetaiotaomicron (strain ATCC 29148 / DSM 2079 / NCTC 10582 / E50 / VPI-5482) OX=226186 GN=dnaA PE=3 SV=1	250101	345636	258103	310389	2.09763e+06	152903	105479	108535	787890	49443.5
Q8A161	Uncharacterized protein OS=Bacteroides thetaiotaomicron (strain ATCC 29148 / DSM 2079 / NCTC 10582 / E50 / VPI-5482) OX=226186 GN=BT_3806 PE=4 SV=1	1.6164e+06	620684	1.36976e+06	1.49131e+06	1.12109e+06	1.33922e+06	1.48071e+06	1.17592e+06	1.7143e+06	1.96314e+06
Q89ZK1	Uncharacterized protein OS=Bacteroides thetaiotaomicron (strain ATCC 29148 / DSM 2079 / NCTC 10582 / E50 / VPI-5482) OX=226186 GN=BT_4376 PE=4 SV=1	3.50995e+06	2.90958e+06	2.88736e+06	2.84714e+06	2.95081e+06	1.81623e+06	1.67384e+06	1.98617e+06	2.99378e+06	1.89052e+06
Q8A2Q6	Putative zinc ABC transporter, zinc-binding protein OS=Bacteroides thetaiotaomicron (strain ATCC 29148 / DSM 2079 / NCTC 10582 / E50 / VPI-5482) OX=226186 GN=BT_3249 PE=3 SV=1	1.23937e+06	1.5252e+06	1.31198e+06	1.24297e+06	1.37117e+06	1.06805e+06	349683	796414	1.53371e+06	665363
Q8ABE6	Putative outer membrane protein, alpha-2-macroglobulin-like protein OS=Bacteroides thetaiotaomicron (strain ATCC 29148 / DSM 2079 / NCTC 10582 / E50 / VPI-5482) OX=226186 GN=BT_0164 PE=3 SV=1	1.84619e+06	1286148	1.49868e+06	1.87878e+06	1.61653e+06	1.03601e+06	771316	859723	1.21267e+06	765035
Q89ZB9	Pyridoxal kinase OS=Bacteroides thetaiotaomicron (strain ATCC 29148 / DSM 2079 / NCTC 10582 / E50 / VPI-5482) OX=226186 GN=BT_4458 PE=1 SV=1	783666	776878	683351	920147	426301	606072	1.18263e+06	670865	908895	1.0063e+06
Q8A1Y0	Uncharacterized protein OS=Bacteroides thetaiotaomicron (strain ATCC 29148 / DSM 2079 / NCTC 10582 / E50 / VPI-5482) OX=226186 GN=BT_3528 PE=4 SV=1	1.59e+06	1.83426e+06	448069	1.59733e+06	1.03452e+06	1.55816e+06	734740	300679	1.11856e+06	729124
Q89YY1	Putative transcriptional regulator OS=Bacteroides thetaiotaomicron (strain ATCC 29148 / DSM 2079 / NCTC 10582 / E50 / VPI-5482) OX=226186 GN=BT_4599 PE=3 SV=1	937482	1.90462e+06	1.28815e+06	1.96671e+06	1.90775e+06	1.56859e+06	1.86126e+06	1.30061e+06	1.90154e+06	412531
Q8A1E8	Gamma-glutamyl phosphate reductase OS=Bacteroides thetaiotaomicron (strain ATCC 29148 / DSM 2079 / NCTC 10582 / E50 / VPI-5482) OX=226186 GN=proA PE=3 SV=1	3.30401e+06	3.85103e+06	3.0241e+06	2.98486e+06	2.23418e+06	2.76618e+06	3.40983e+06	3.08214e+06	2.84479e+06	3.21134e+06
Q89YX9	Histone-like bacterial DNA-binding protein OS=Bacteroides thetaiotaomicron (strain ATCC 29148 / DSM 2079 / NCTC 10582 / E50 / VPI-5482) OX=226186 GN=BT_4601 PE=4 SV=1	1.66962e+06	1.94756e+06	1.43894e+06	1.17497e+06	1.18059e+06	1.73839e+06	1.43645e+06	987530	1.90613e+06	1.51612e+06
Q8AB87	Two-component system response regulator OS=Bacteroides thetaiotaomicron (strain ATCC 29148 / DSM 2079 / NCTC 10582 / E50 / VPI-5482) OX=226186 GN=BT_0223 PE=4 SV=1	1.69496e+06	1.229e+06	1.24161e+06	1.28057e+06	1.08486e+06	1.47755e+06	1.49355e+06	975502	1.46027e+06	1.38553e+06
Q8A507	5'-nucleotidase OS=Bacteroides thetaiotaomicron (strain ATCC 29148 / DSM 2079 / NCTC 10582 / E50 / VPI-5482) OX=226186 GN=BT_2440 PE=4 SV=1	2.60409e+06	2.55909e+06	3.08775e+06	2.33655e+06	2.09869e+06	3.63723e+06	3.52167e+06	2.85363e+06	3.62186e+06	3.01805e+06
E7MCA4	Uncharacterized protein OS=Bacteroides thetaiotaomicron (strain ATCC 29148 / DSM 2079 / NCTC 10582 / E50 / VPI-5482) OX=226186 GN=BT_0914a PE=4 SV=1	6.32146e+07	1.21625e+08	6.07902e+07	6.55639e+07	1.20348e+08	1.47411e+08	1.12197e+08	1.53947e+08	1.454e+08	7.55658e+07
Q8ABE5	Peptidyl-prolyl cis-trans isomerase OS=Bacteroides thetaiotaomicron (strain ATCC 29148 / DSM 2079 / NCTC 10582 / E50 / VPI-5482) OX=226186 GN=BT_0165 PE=3 SV=1	3.53268e+06	4.16712e+06	3.81764e+06	3.71672e+06	4.32397e+06	4.85686e+06	3.26771e+06	3.75457e+06	4.92903e+06	4.01835e+06
Q8A6I0	Transcriptional regulator, AraC-type OS=Bacteroides thetaiotaomicron (strain ATCC 29148 / DSM 2079 / NCTC 10582 / E50 / VPI-5482) OX=226186 GN=BT_1904 PE=4 SV=1	1.60206e+06	2.11192e+06	2.37597e+06	2.0381e+06	1.83053e+06	2.69988e+06	1.8161e+06	1.89361e+06	2.63605e+06	2.95032e+06
Q8A2U0	Uncharacterized protein OS=Bacteroides thetaiotaomicron (strain ATCC 29148 / DSM 2079 / NCTC 10582 / E50 / VPI-5482) OX=226186 GN=BT_3215 PE=4 SV=1	2.68929e+06	2.41548e+06	1.91679e+06	1.84084e+06	1.9981e+06	2.97928e+06	2.07073e+06	1849614	2.69552e+06	2.51173e+06
Q8A2E9	ATP-dependent 6-phosphofructokinase 3 OS=Bacteroides thetaiotaomicron (strain ATCC 29148 / DSM 2079 / NCTC 10582 / E50 / VPI-5482) OX=226186 GN=pfkA3 PE=3 SV=1	3.5657e+06	3.21033e+06	3.7123e+06	2.54958e+06	2.52754e+06	4.21746e+06	4.96253e+06	3.96865e+06	4.65612e+06	4.05135e+06
Q8A9X1	ABC transporter, ATP-binding protein OS=Bacteroides thetaiotaomicron (strain ATCC 29148 / DSM 2079 / NCTC 10582 / E50 / VPI-5482) OX=226186 GN=BT_0694 PE=4 SV=1	952971	845936	785360	490457	1.02099e+06	2.00672e+06	1.41535e+06	2.06746e+06	2.77276e+06	2.75579e+06
Q8AAH8	Transcriptional regulator OS=Bacteroides thetaiotaomicron (strain ATCC 29148 / DSM 2079 / NCTC 10582 / E50 / VPI-5482) OX=226186 GN=BT_0487 PE=4 SV=1	729577	860215	627489	534002	761762	928701	612505	691336	1.26593e+06	557249
Q8ABZ3	Putative replication protein B OS=Bacteroides thetaiotaomicron (strain ATCC 29148 / DSM 2079 / NCTC 10582 / E50 / VPI-5482) OX=226186 GN=BT_p548205 PE=4 SV=1	3381649	3.59403e+06	4.31176e+06	3.6857e+06	3.34549e+06	3.2378e+06	2.38631e+06	2.87848e+06	3.23322e+06	2.88668e+06
Q8AA85	Putative H+/peptide symporter OS=Bacteroides thetaiotaomicron (strain ATCC 29148 / DSM 2079 / NCTC 10582 / E50 / VPI-5482) OX=226186 GN=BT_0580 PE=3 SV=1	399038	2.50707e+06	211244	1.49839e+06	1.45802e+06	679523	607642	1.49825e+06	885371	702121
Q8A7D1	tRNA(Ile)-lysidine synthase OS=Bacteroides thetaiotaomicron (strain ATCC 29148 / DSM 2079 / NCTC 10582 / E50 / VPI-5482) OX=226186 GN=tilS PE=3 SV=1	481826	685013	611496	542784	545480	731319	196637	209958	950919	539348
Q8A9C6	DNA polymerase III-like, delta subunit OS=Bacteroides thetaiotaomicron (strain ATCC 29148 / DSM 2079 / NCTC 10582 / E50 / VPI-5482) OX=226186 GN=BT_0889 PE=4 SV=1	1.12358e+06	552050	1.08255e+06	1.2095e+06	751939	1.3858e+06	1.17595e+06	1.19481e+06	1.46912e+06	1.63561e+06
Q8AAT4	Nucleotide sugar epimerase OS=Bacteroides thetaiotaomicron (strain ATCC 29148 / DSM 2079 / NCTC 10582 / E50 / VPI-5482) OX=226186 GN=BT_0380 PE=4 SV=1	16426.3	358176	749094	629301	NA	488012	82940.5	470619	861936	668228
Q8A0C5	Lipolytic enzyme, G-D-S-L family OS=Bacteroides thetaiotaomicron (strain ATCC 29148 / DSM 2079 / NCTC 10582 / E50 / VPI-5482) OX=226186 GN=BT_4096 PE=1 SV=1	602848	853907	920115	443778	507657	806920	726917	331661	767288	1.14209e+06
Q8A102	UPF0246 protein BT_3869 OS=Bacteroides thetaiotaomicron (strain ATCC 29148 / DSM 2079 / NCTC 10582 / E50 / VPI-5482) OX=226186 GN=BT_3869 PE=3 SV=1	1.17952e+06	1.14808e+06	1.20215e+06	936320	803542	927309	1.10152e+06	657806	1.04459e+06	1.0672e+06
Q8A0P9	Putative NTP pyrophosphohydrolase OS=Bacteroides thetaiotaomicron (strain ATCC 29148 / DSM 2079 / NCTC 10582 / E50 / VPI-5482) OX=226186 GN=BT_3972 PE=4 SV=1	760085	2.52599e+06	1.11127e+06	2.46997e+06	1.95583e+06	2.34301e+06	3.51514e+06	2.47007e+06	3.56622e+06	1.71815e+06
Q8A1G0	Neopullulanase SusA OS=Bacteroides thetaiotaomicron (strain ATCC 29148 / DSM 2079 / NCTC 10582 / E50 / VPI-5482) OX=226186 GN=susA PE=3 SV=1	2.77712e+06	2.25057e+06	1.62854e+06	1.61468e+06	1.48965e+06	2228091	2.33589e+06	1.27595e+06	2.55896e+06	2.52323e+06
Q89YV6	Site-specific DNA-methyltransferase (adenine-specific) OS=Bacteroides thetaiotaomicron (strain ATCC 29148 / DSM 2079 / NCTC 10582 / E50 / VPI-5482) OX=226186 GN=BT_4625 PE=3 SV=1	873575	292861	582085	330123	233320	476530	785558	503072	784192	1.15475e+06
Q8A847	Putative alkaline phosphatase OS=Bacteroides thetaiotaomicron (strain ATCC 29148 / DSM 2079 / NCTC 10582 / E50 / VPI-5482) OX=226186 GN=BT_1327 PE=4 SV=1	1.68009e+06	2.23293e+06	1.77971e+06	1.27925e+06	2.12845e+06	2.40336e+06	2.24483e+06	3.46855e+06	2.96362e+06	1.99593e+06
Q8A656	Uncharacterized protein OS=Bacteroides thetaiotaomicron (strain ATCC 29148 / DSM 2079 / NCTC 10582 / E50 / VPI-5482) OX=226186 GN=BT_2030 PE=4 SV=1	649227	862234	1.87404e+06	1.1885e+06	800550	1.29641e+06	1.43172e+06	1.38854e+06	1.8201e+06	1.43416e+06
Q8A035	Uncharacterized protein OS=Bacteroides thetaiotaomicron (strain ATCC 29148 / DSM 2079 / NCTC 10582 / E50 / VPI-5482) OX=226186 GN=BT_4186 PE=4 SV=1	1.7043e+06	2.20374e+06	733396	894392	1.29131e+06	983121	2.23927e+06	1.794e+06	1.84187e+06	2.26346e+06
Q8A2X4	Putative sulfate transporter, permease OS=Bacteroides thetaiotaomicron (strain ATCC 29148 / DSM 2079 / NCTC 10582 / E50 / VPI-5482) OX=226186 GN=BT_3181 PE=3 SV=1	1.729e+06	1.30582e+06	1.00431e+06	1.83917e+06	2.24683e+06	1.76956e+06	1.98778e+06	2.27805e+06	3.25538e+06	3.27616e+06
Q89ZJ8	Putative oxalate:formate antiporter OS=Bacteroides thetaiotaomicron (strain ATCC 29148 / DSM 2079 / NCTC 10582 / E50 / VPI-5482) OX=226186 GN=BT_4379 PE=4 SV=1	662811	2.05568e+06	935386	1.20596e+06	1.49677e+06	1.09325e+06	907300	1.22698e+06	1.57126e+06	765489
Q8A7Z4	Imidazole glycerol phosphate synthase subunit HisH OS=Bacteroides thetaiotaomicron (strain ATCC 29148 / DSM 2079 / NCTC 10582 / E50 / VPI-5482) OX=226186 GN=hisH PE=3 SV=1	3.68588e+06	2.55655e+06	3.09349e+06	2.55638e+06	2.48031e+06	2.22599e+06	3.94563e+06	3.31675e+06	3.50549e+06	4.98655e+06
Q8A0Y0	Exodeoxyribonuclease 7 small subunit OS=Bacteroides thetaiotaomicron (strain ATCC 29148 / DSM 2079 / NCTC 10582 / E50 / VPI-5482) OX=226186 GN=BT_3891 PE=3 SV=1	1.4254e+06	814041	1.58737e+06	1.06174e+06	1.03064e+06	1.78376e+06	2.01411e+06	1.78761e+06	1.74565e+06	2.3246e+06
Q8A648	Cation efflux system protein OS=Bacteroides thetaiotaomicron (strain ATCC 29148 / DSM 2079 / NCTC 10582 / E50 / VPI-5482) OX=226186 GN=BT_2038 PE=3 SV=1	2.36871e+06	2.37073e+06	2.24721e+06	1.92729e+06	2.28829e+06	1.60683e+06	1.83267e+06	1.61372e+06	1.80824e+06	1.65285e+06
Q8A2B2	Shikimate kinase OS=Bacteroides thetaiotaomicron (strain ATCC 29148 / DSM 2079 / NCTC 10582 / E50 / VPI-5482) OX=226186 GN=aroK PE=1 SV=1	1.155e+06	1.16361e+06	851007	1.21821e+06	1.28196e+06	1.35332e+06	1.03917e+06	829448	1.31597e+06	879834
Q8A6G0	Putative metal-dependent hydrolase OS=Bacteroides thetaiotaomicron (strain ATCC 29148 / DSM 2079 / NCTC 10582 / E50 / VPI-5482) OX=226186 GN=BT_1924 PE=4 SV=1	1.77242e+06	1.53616e+06	1.68138e+06	1.16619e+06	1.43985e+06	1.52188e+06	1.44503e+06	1.26786e+06	1.64294e+06	1.68062e+06
Q89Z70	Beta-lactamase OS=Bacteroides thetaiotaomicron (strain ATCC 29148 / DSM 2079 / NCTC 10582 / E50 / VPI-5482) OX=226186 GN=BT_4507 PE=4 SV=1	2.90735e+06	3.10884e+06	3829088	2.3477e+06	2.86503e+06	5.32077e+06	6.55335e+06	4.77631e+06	5.14879e+06	5.46308e+06
Q8A0W4	N-6 Adenine-specific DNA methylase OS=Bacteroides thetaiotaomicron (strain ATCC 29148 / DSM 2079 / NCTC 10582 / E50 / VPI-5482) OX=226186 GN=BT_3907 PE=4 SV=1	936279	968975	717050	825810	865968	167974	25511.8	201476	319388	184442
G8JZT1	L-fuculose-1-phosphate aldolase OS=Bacteroides thetaiotaomicron (strain ATCC 29148 / DSM 2079 / NCTC 10582 / E50 / VPI-5482) OX=226186 GN=BT_1274 PE=4 SV=1	957955	885841	1.22635e+06	710618	462881	536868	812398	348441	648212	1.34185e+06
Q8A2N9	UvrABC system protein C OS=Bacteroides thetaiotaomicron (strain ATCC 29148 / DSM 2079 / NCTC 10582 / E50 / VPI-5482) OX=226186 GN=uvrC PE=3 SV=1	774760	721250	987803	163800	649343	615438	493922	446654	844782	787555
Q8A1P7	Peptidyl-prolyl cis-trans isomerase OS=Bacteroides thetaiotaomicron (strain ATCC 29148 / DSM 2079 / NCTC 10582 / E50 / VPI-5482) OX=226186 GN=BT_3612 PE=3 SV=1	4.81932e+06	9.29886e+06	6.65839e+06	8.9774e+06	7.52063e+06	9.22761e+06	7.55402e+06	9.10193e+06	9.90439e+06	3808896
Q8ABD1	SsrA-binding protein OS=Bacteroides thetaiotaomicron (strain ATCC 29148 / DSM 2079 / NCTC 10582 / E50 / VPI-5482) OX=226186 GN=smpB PE=3 SV=1	1.6999e+06	2.08097e+06	1.91954e+06	1.58857e+06	2.11199e+06	1.65291e+06	951725	1.36523e+06	1813380	364452
Q8A6E5	Putative outer membrane receptor OS=Bacteroides thetaiotaomicron (strain ATCC 29148 / DSM 2079 / NCTC 10582 / E50 / VPI-5482) OX=226186 GN=BT_1939 PE=3 SV=1	11404.7	541221	117329	554262	4.05778e+06	2.9183e+06	NA	6136460	1.88954e+06	27219.7
Q8A2C8	Glycoside transferase family 14 OS=Bacteroides thetaiotaomicron (strain ATCC 29148 / DSM 2079 / NCTC 10582 / E50 / VPI-5482) OX=226186 GN=BT_3377 PE=4 SV=1	355811	401193	627181	668951	608227	435007	770213	392946	989686	510807
Q8A1H6	Beta-glucanase OS=Bacteroides thetaiotaomicron (strain ATCC 29148 / DSM 2079 / NCTC 10582 / E50 / VPI-5482) OX=226186 GN=BT_3685 PE=3 SV=1	2.82215e+06	4.08394e+06	3.74709e+06	3.13789e+06	2.93526e+06	2.37373e+06	1.96876e+06	1.93868e+06	2.14635e+06	2.24821e+06
Q8A825	dTDP-4-dehydrorhamnose epimerase-like protein OS=Bacteroides thetaiotaomicron (strain ATCC 29148 / DSM 2079 / NCTC 10582 / E50 / VPI-5482) OX=226186 GN=BT_1349 PE=4 SV=1	3990207	3.35784e+06	3.21789e+06	3174416	3.54994e+06	3.4417e+06	3.53961e+06	3.0178e+06	4.0487e+06	3.28261e+06
Q8A0Z2	Putative translation initiation factor SUI1 OS=Bacteroides thetaiotaomicron (strain ATCC 29148 / DSM 2079 / NCTC 10582 / E50 / VPI-5482) OX=226186 GN=BT_3879 PE=3 SV=1	7.4598e+06	5.12892e+06	5.27835e+06	4.92078e+06	5.10301e+06	5.96103e+06	5.70352e+06	5.60609e+06	6.3545e+06	7.18029e+06
Q8A7I5	Cytidine deaminase OS=Bacteroides thetaiotaomicron (strain ATCC 29148 / DSM 2079 / NCTC 10582 / E50 / VPI-5482) OX=226186 GN=BT_1539 PE=4 SV=1	3.31164e+06	3.51373e+06	2.75208e+06	2.77183e+06	3.07032e+06	3.14156e+06	2.26205e+06	2.95785e+06	3.56798e+06	1.86517e+06
Q8A0V9	Uncharacterized protein OS=Bacteroides thetaiotaomicron (strain ATCC 29148 / DSM 2079 / NCTC 10582 / E50 / VPI-5482) OX=226186 GN=BT_3912 PE=4 SV=1	7.59592e+06	8.60933e+06	7373518	7787810	8.41243e+06	6.39939e+06	3.98242e+06	8.74742e+06	7.46707e+06	4.59475e+06
Q89YZ3	S4 RNA-binding domain-containing protein OS=Bacteroides thetaiotaomicron (strain ATCC 29148 / DSM 2079 / NCTC 10582 / E50 / VPI-5482) OX=226186 GN=BT_4587 PE=3 SV=1	6.10623e+06	4.18197e+06	4.01592e+06	4.48943e+06	4.07006e+06	4.10194e+06	2.54425e+06	3.2553e+06	3.42796e+06	5.76757e+06
Q8A0S2	Uncharacterized protein OS=Bacteroides thetaiotaomicron (strain ATCC 29148 / DSM 2079 / NCTC 10582 / E50 / VPI-5482) OX=226186 GN=BT_3949 PE=4 SV=1	8.05696e+06	6983800	5.29507e+06	7.2742e+06	6.6881e+06	6.28489e+06	4.42209e+06	5.29498e+06	5.38146e+06	5.04015e+06
Q8A4U0	Uncharacterized protein OS=Bacteroides thetaiotaomicron (strain ATCC 29148 / DSM 2079 / NCTC 10582 / E50 / VPI-5482) OX=226186 GN=BT_2507 PE=4 SV=1	289208	287816	257305	444567	616360	1.36712e+06	173911	1.06148e+06	1.53331e+06	670531
Q8A9J4	Putative permease OS=Bacteroides thetaiotaomicron (strain ATCC 29148 / DSM 2079 / NCTC 10582 / E50 / VPI-5482) OX=226186 GN=BT_0821 PE=4 SV=1	2.94427e+06	2.38629e+06	2.27442e+06	2.06004e+06	2.15911e+06	1.66736e+06	2.34265e+06	1.10289e+06	2.3592e+06	2.4309e+06
Q8A517	Hexokinase type III OS=Bacteroides thetaiotaomicron (strain ATCC 29148 / DSM 2079 / NCTC 10582 / E50 / VPI-5482) OX=226186 GN=BT_2430 PE=3 SV=1	1.43562e+06	2.90954e+06	1.85448e+06	2.5496e+06	2.14507e+06	2.06007e+06	1.23148e+06	1.56831e+06	2.30594e+06	1.40888e+06
Q8A5K1	Putative biotin--(Acetyl-CoA carboxylase) synthetase OS=Bacteroides thetaiotaomicron (strain ATCC 29148 / DSM 2079 / NCTC 10582 / E50 / VPI-5482) OX=226186 GN=BT_2238 PE=4 SV=1	569285	874295	985581	1.05091e+06	445221	1.6916e+06	1.42413e+06	1.14475e+06	1.44472e+06	2.0695e+06
Q89ZX1	RNA polymerase ECF-type sigma factor OS=Bacteroides thetaiotaomicron (strain ATCC 29148 / DSM 2079 / NCTC 10582 / E50 / VPI-5482) OX=226186 GN=BT_4250 PE=3 SV=1	1.20838e+06	533049	1.24496e+06	962681	540576	906843	1.08304e+06	908178	832230	1.73364e+06
Q8A1V0	Putative endonuclease OS=Bacteroides thetaiotaomicron (strain ATCC 29148 / DSM 2079 / NCTC 10582 / E50 / VPI-5482) OX=226186 GN=BT_3558 PE=4 SV=1	2.44627e+06	2.62253e+06	2.36422e+06	2.17657e+06	2.37085e+06	2.97475e+06	2.66232e+06	3.06455e+06	3.00966e+06	3.21077e+06
Q8A2D2	Spermidine n1-acetyltransferase OS=Bacteroides thetaiotaomicron (strain ATCC 29148 / DSM 2079 / NCTC 10582 / E50 / VPI-5482) OX=226186 GN=BT_3373 PE=4 SV=1	509313	374401	502460	515896	411631	831899	618894	96777.7	941415	503981
Q8A6K3	Putative alpha-1,2-mannosidase OS=Bacteroides thetaiotaomicron (strain ATCC 29148 / DSM 2079 / NCTC 10582 / E50 / VPI-5482) OX=226186 GN=BT_1878 PE=4 SV=1	1.11172e+06	1.6726e+06	1.31616e+06	1.66279e+06	928595	808515	1.45625e+06	1.33522e+06	1.41855e+06	1.0096e+06
Q8A758	Uncharacterized protein OS=Bacteroides thetaiotaomicron (strain ATCC 29148 / DSM 2079 / NCTC 10582 / E50 / VPI-5482) OX=226186 GN=BT_1667 PE=4 SV=1	102191	1.03114e+06	890477	521551	626618	1.02621e+06	1.43117e+06	1209947	1.11494e+06	738565
Q8A5S4	MarR family transcriptional regulator OS=Bacteroides thetaiotaomicron (strain ATCC 29148 / DSM 2079 / NCTC 10582 / E50 / VPI-5482) OX=226186 GN=BT_2164 PE=4 SV=1	1.56279e+06	1.95349e+06	1.40923e+06	2.23417e+06	1.80185e+06	2.59594e+06	3.13522e+06	2.40363e+06	2.54596e+06	1.73206e+06
[truncated: 533 more rows]

## Sheet: Protein abundances log2
Accession	Description	BPF_1	BPF_2	BPF_3	BPF_4	BPF_5	control1	control2	control3	control4	control5
[truncated: 1,956 more rows]

[truncated: 3 more sheets: Abundances log2, median normal., t-test, FC, Significantly altered proteins]
