# Supplementary material for: Adaptation and Resistance: How Bacteroides thetaiotaomicron Copes with the Bisphenol A Substitute Bisphenol F
Source: Microorganisms. 2022 Aug 9;10(8):1610. doi: 10.3390/microorganisms10081610 (PMC9414779; doi:10.3390/microorganisms10081610)
Supplement: Supplementary file 1 [file microorganisms-10-01610-s001.zip › Supplementary Material Table S5_proteomics unique proteins.xlsx]

## Sheet: control unique proteins
Accession	Description	control1	control3	control4	control5	control6
Q8A4Z7	Uncharacterized protein OS=Bacteroides thetaiotaomicron (strain ATCC 29148 / DSM 2079 / NCTC 10582 / E50 / VPI-5482) OX=226186 GN=BT_2450 PE=4 SV=1	3.16509e+06	2.31078e+06	2.25379e+06	3.87588e+06	3.24939e+06
Q8AAG3	TonB-dependent outer membrane receptor OS=Bacteroides thetaiotaomicron (strain ATCC 29148 / DSM 2079 / NCTC 10582 / E50 / VPI-5482) OX=226186 GN=BT_0502 PE=3 SV=1	377144	509509	434942	573821	NA
Q8A536	LuxR family transcriptional regulator OS=Bacteroides thetaiotaomicron (strain ATCC 29148 / DSM 2079 / NCTC 10582 / E50 / VPI-5482) OX=226186 GN=BT_2408 PE=4 SV=1	NA	NA	245337	5314.7	553843
Q8A4H9	Alpha-glucosidase OS=Bacteroides thetaiotaomicron (strain ATCC 29148 / DSM 2079 / NCTC 10582 / E50 / VPI-5482) OX=226186 GN=BT_2620 PE=4 SV=1	512591	632067	539069	305109	590899
Q8A2A7	Putative lipoprotein OS=Bacteroides thetaiotaomicron (strain ATCC 29148 / DSM 2079 / NCTC 10582 / E50 / VPI-5482) OX=226186 GN=BT_3398 PE=4 SV=1	102909	NA	84265.8	NA	192766
Q89ZL1	Type III pantothenate kinase OS=Bacteroides thetaiotaomicron (strain ATCC 29148 / DSM 2079 / NCTC 10582 / E50 / VPI-5482) OX=226186 GN=coaX PE=3 SV=2	188841	NA	86994.2	312263	16608.9
Q8A837	Putative aminopeptidase C OS=Bacteroides thetaiotaomicron (strain ATCC 29148 / DSM 2079 / NCTC 10582 / E50 / VPI-5482) OX=226186 GN=BT_1337 PE=4 SV=1	255287	215233	275487	482454	NA
Q8A9X5	Two-component system response regulator OS=Bacteroides thetaiotaomicron (strain ATCC 29148 / DSM 2079 / NCTC 10582 / E50 / VPI-5482) OX=226186 GN=BT_0690 PE=4 SV=1	326756	NA	188687	225003	225128
Q89YN8	Cation efflux system protein OS=Bacteroides thetaiotaomicron (strain ATCC 29148 / DSM 2079 / NCTC 10582 / E50 / VPI-5482) OX=226186 GN=BT_4693 PE=3 SV=1	409558	218097	264740	431585	421192
Q8A121	Uncharacterized protein OS=Bacteroides thetaiotaomicron (strain ATCC 29148 / DSM 2079 / NCTC 10582 / E50 / VPI-5482) OX=226186 GN=BT_3850 PE=4 SV=1	409701	NA	408502	561763	NA
Q877V2	Uncharacterized protein OS=Bacteroides thetaiotaomicron (strain ATCC 29148 / DSM 2079 / NCTC 10582 / E50 / VPI-5482) OX=226186 GN=BT_1891 PE=4 SV=1	42894.9	49254.9	31315.2	124500	13778.6
Q8A7X8	Transcription regulator, AraC family OS=Bacteroides thetaiotaomicron (strain ATCC 29148 / DSM 2079 / NCTC 10582 / E50 / VPI-5482) OX=226186 GN=BT_1396 PE=4 SV=1	548534	405245	242627	362966	402849
Q89YJ8	HTH cro/C1-type domain-containing protein OS=Bacteroides thetaiotaomicron (strain ATCC 29148 / DSM 2079 / NCTC 10582 / E50 / VPI-5482) OX=226186 GN=BT_4733 PE=4 SV=1	760803	829370	642487	715237	675153
Q8A0N5	Putative patatin-like protein OS=Bacteroides thetaiotaomicron (strain ATCC 29148 / DSM 2079 / NCTC 10582 / E50 / VPI-5482) OX=226186 GN=BT_3986 PE=4 SV=1	NA	NA	20417	195921	146380
Q8A1Y9	SusC homolog OS=Bacteroides thetaiotaomicron (strain ATCC 29148 / DSM 2079 / NCTC 10582 / E50 / VPI-5482) OX=226186 GN=BT_3519 PE=4 SV=1	552239	979240	518548	582863	935297
Q8A257	Rod shape-determining protein rodA OS=Bacteroides thetaiotaomicron (strain ATCC 29148 / DSM 2079 / NCTC 10582 / E50 / VPI-5482) OX=226186 GN=BT_3449 PE=4 SV=1	200483	NA	293901	289889	NA
Q8A7D7	GCN5-related N-acetyltransferase OS=Bacteroides thetaiotaomicron (strain ATCC 29148 / DSM 2079 / NCTC 10582 / E50 / VPI-5482) OX=226186 GN=BT_1587 PE=4 SV=1	NA	66707.8	50791.8	171794	133034
Q8AB63	RNA polymerase ECF-type sigma factor OS=Bacteroides thetaiotaomicron (strain ATCC 29148 / DSM 2079 / NCTC 10582 / E50 / VPI-5482) OX=226186 GN=BT_0248 PE=3 SV=1	25607.3	16941	16880.5	77348.9	NA
Q8A431	Forkhead-associated protein-like protein OS=Bacteroides thetaiotaomicron (strain ATCC 29148 / DSM 2079 / NCTC 10582 / E50 / VPI-5482) OX=226186 GN=BT_2773 PE=4 SV=1	128471	NA	156460	140399	NA
Q8A2X6	Beta-galactosidase OS=Bacteroides thetaiotaomicron (strain ATCC 29148 / DSM 2079 / NCTC 10582 / E50 / VPI-5482) OX=226186 GN=BT_3179 PE=1 SV=1	NA	57416	112268	NA	115604
Q8AA99	Alanyl-tRNA synthetase OS=Bacteroides thetaiotaomicron (strain ATCC 29148 / DSM 2079 / NCTC 10582 / E50 / VPI-5482) OX=226186 GN=BT_0566 PE=4 SV=1	400671	NA	457812	534167	NA
Q8A385	Smf protein DNA processing chain A OS=Bacteroides thetaiotaomicron (strain ATCC 29148 / DSM 2079 / NCTC 10582 / E50 / VPI-5482) OX=226186 GN=BT_3070 PE=3 SV=1	47118.3	54989	35702.7	183631	54338.7
Q8A3H3	Uncharacterized protein OS=Bacteroides thetaiotaomicron (strain ATCC 29148 / DSM 2079 / NCTC 10582 / E50 / VPI-5482) OX=226186 GN=BT_2981 PE=4 SV=1	41135.2	14684.1	9081.37	NA	12119.1
Q8A9C5	Putative DNA-binding protein OS=Bacteroides thetaiotaomicron (strain ATCC 29148 / DSM 2079 / NCTC 10582 / E50 / VPI-5482) OX=226186 GN=BT_0890 PE=4 SV=1	NA	NA	783016	1379991	1.34826e+06
Q8A4B0	Glutamate formimidoyltransferase OS=Bacteroides thetaiotaomicron (strain ATCC 29148 / DSM 2079 / NCTC 10582 / E50 / VPI-5482) OX=226186 GN=BT_2693 PE=4 SV=1	566822	233340	419312	704279	309457
G8JZS5	FucR OS=Bacteroides thetaiotaomicron (strain ATCC 29148 / DSM 2079 / NCTC 10582 / E50 / VPI-5482) OX=226186 GN=BT_1272 PE=4 SV=1	NA	NA	188398	115793	139295
Q8A8G5	UDP-N-acetylglucosamine 2-epimerase OS=Bacteroides thetaiotaomicron (strain ATCC 29148 / DSM 2079 / NCTC 10582 / E50 / VPI-5482) OX=226186 GN=BT_1202 PE=3 SV=1	866228	NA	809800	NA	4183.92
Q89YT8	RNA polymerase ECF-type sigma factor OS=Bacteroides thetaiotaomicron (strain ATCC 29148 / DSM 2079 / NCTC 10582 / E50 / VPI-5482) OX=226186 GN=BT_4643 PE=3 SV=1	329009	372226	295439	374776	383943
Q8A1U0	SusD homolog OS=Bacteroides thetaiotaomicron (strain ATCC 29148 / DSM 2079 / NCTC 10582 / E50 / VPI-5482) OX=226186 GN=BT_3568 PE=3 SV=1	NA	521721	110487	542874	433582
Q8AB03	Dihydrolipoyl dehydrogenase OS=Bacteroides thetaiotaomicron (strain ATCC 29148 / DSM 2079 / NCTC 10582 / E50 / VPI-5482) OX=226186 GN=BT_0309 PE=3 SV=1	NA	204545	251997	202304	NA
Q8A2U5	Cell division protein FtsX OS=Bacteroides thetaiotaomicron (strain ATCC 29148 / DSM 2079 / NCTC 10582 / E50 / VPI-5482) OX=226186 GN=BT_3210 PE=3 SV=1	NA	179704	169138	299281	NA
Q8AA05	Prokaryotic ATPase OS=Bacteroides thetaiotaomicron (strain ATCC 29148 / DSM 2079 / NCTC 10582 / E50 / VPI-5482) OX=226186 GN=BT_0660 PE=4 SV=1	327521	NA	278435	NA	32892.1
Q8ABC9	Putative NADH dehydrogenase/NAD(P)H nitroreductase OS=Bacteroides thetaiotaomicron (strain ATCC 29148 / DSM 2079 / NCTC 10582 / E50 / VPI-5482) OX=226186 GN=BT_0181 PE=1 SV=1	292915	604268	202152	272431	464006
Q8A953	Putative outer membrane protein, probably involved in nutrient binding OS=Bacteroides thetaiotaomicron (strain ATCC 29148 / DSM 2079 / NCTC 10582 / E50 / VPI-5482) OX=226186 GN=BT_0964 PE=4 SV=1	369098	9454.19	401839	26324	1612.3
Q8A554	Uncharacterized protein OS=Bacteroides thetaiotaomicron (strain ATCC 29148 / DSM 2079 / NCTC 10582 / E50 / VPI-5482) OX=226186 GN=BT_2388 PE=4 SV=1	177284	443972	217545	259471	NA
Q8AAM0	Uncharacterized protein OS=Bacteroides thetaiotaomicron (strain ATCC 29148 / DSM 2079 / NCTC 10582 / E50 / VPI-5482) OX=226186 GN=BT_0444 PE=4 SV=1	301250	606940	572193	577066	676906
Q8A4N7	Putative RNA polymerase ECF-type sigma factor OS=Bacteroides thetaiotaomicron (strain ATCC 29148 / DSM 2079 / NCTC 10582 / E50 / VPI-5482) OX=226186 GN=BT_2562 PE=4 SV=1	1000332	278590	886234	1.29032e+06	10419.2
Q8A4T6	Putative transcription regulator OS=Bacteroides thetaiotaomicron (strain ATCC 29148 / DSM 2079 / NCTC 10582 / E50 / VPI-5482) OX=226186 GN=BT_2511 PE=4 SV=1	161632	NA	185104	181090	NA

## Sheet: BPF unique proteins
Accession	Description	C2_2	C2_3	C2_4	C2_5	C2_6
Q89YZ9	Alpha-glucosidase OS=Bacteroides thetaiotaomicron (strain ATCC 29148 / DSM 2079 / NCTC 10582 / E50 / VPI-5482) OX=226186 GN=BT_4581 PE=4 SV=1	58279.2	358422	34385.6	34452.7	NA
Q8A6C0	Bacterial regulatory protein, Te-like protein OS=Bacteroides thetaiotaomicron (strain ATCC 29148 / DSM 2079 / NCTC 10582 / E50 / VPI-5482) OX=226186 GN=BT_1964 PE=4 SV=1	1.06304e+06	227869	505555	702585	465272
Q8A735	TPR domain-containing protein OS=Bacteroides thetaiotaomicron (strain ATCC 29148 / DSM 2079 / NCTC 10582 / E50 / VPI-5482) OX=226186 GN=BT_1690 PE=4 SV=1	178489	NA	NA	331750	167350
Q8A7J4	Putative outer membrane protein OprM OS=Bacteroides thetaiotaomicron (strain ATCC 29148 / DSM 2079 / NCTC 10582 / E50 / VPI-5482) OX=226186 GN=BT_1530 PE=3 SV=1	956265	556882	493228	623151	456964
Q89ZG7	Uncharacterized protein OS=Bacteroides thetaiotaomicron (strain ATCC 29148 / DSM 2079 / NCTC 10582 / E50 / VPI-5482) OX=226186 GN=BT_4410 PE=4 SV=1	1.26491e+06	1.01737e+06	1.04755e+06	1.08492e+06	971063
Q8A9X4	Uncharacterized protein OS=Bacteroides thetaiotaomicron (strain ATCC 29148 / DSM 2079 / NCTC 10582 / E50 / VPI-5482) OX=226186 GN=BT_0691 PE=4 SV=1	1.96826e+06	1.36005e+06	1.50523e+06	2.05094e+06	1.20823e+06
Q8AAN3	Endolytic murein transglycosylase OS=Bacteroides thetaiotaomicron (strain ATCC 29148 / DSM 2079 / NCTC 10582 / E50 / VPI-5482) OX=226186 GN=mltG PE=3 SV=1	239318	121455	84741.5	NA	370130
Q8A6J7	Cold shock protein, putative DNA-binding protein OS=Bacteroides thetaiotaomicron (strain ATCC 29148 / DSM 2079 / NCTC 10582 / E50 / VPI-5482) OX=226186 GN=BT_1884 PE=4 SV=1	3.83186e+06	2.18416e+06	1.86778e+06	1.76605e+06	1.1666e+06
Q8A886	Spermidine/putrescine ABC transporter OS=Bacteroides thetaiotaomicron (strain ATCC 29148 / DSM 2079 / NCTC 10582 / E50 / VPI-5482) OX=226186 GN=BT_1288 PE=3 SV=1	251847	613416	185281	569082	357967
Q8A7J7	Putative outer membrane protein OS=Bacteroides thetaiotaomicron (strain ATCC 29148 / DSM 2079 / NCTC 10582 / E50 / VPI-5482) OX=226186 GN=BT_1527 PE=4 SV=1	708158	738790	431352	404460	430060
Q89ZW9	Glycosyl hydrolase family 109 protein 2 OS=Bacteroides thetaiotaomicron (strain ATCC 29148 / DSM 2079 / NCTC 10582 / E50 / VPI-5482) OX=226186 GN=BT_4252 PE=3 SV=1	151912	104479	NA	247183	NA
Q8A9E6	Lipocalin-like domain-containing protein OS=Bacteroides thetaiotaomicron (strain ATCC 29148 / DSM 2079 / NCTC 10582 / E50 / VPI-5482) OX=226186 GN=BT_0869 PE=1 SV=1	340360	NA	NA	681535	689176
Q89YN4	Transcriptional regulator OS=Bacteroides thetaiotaomicron (strain ATCC 29148 / DSM 2079 / NCTC 10582 / E50 / VPI-5482) OX=226186 GN=BT_4697 PE=4 SV=1	226322	327100	201685	251869	243940
Q89YT4	RNA polymerase sigma factor OS=Bacteroides thetaiotaomicron (strain ATCC 29148 / DSM 2079 / NCTC 10582 / E50 / VPI-5482) OX=226186 GN=BT_4647 PE=3 SV=1	NA	133514	234213	150308	NA
Q8A0N7	SusD homolog OS=Bacteroides thetaiotaomicron (strain ATCC 29148 / DSM 2079 / NCTC 10582 / E50 / VPI-5482) OX=226186 GN=BT_3984 PE=1 SV=1	17778.6	62759.4	3677.27	10375.5	NA
Q8A0N8	SusC homolog OS=Bacteroides thetaiotaomicron (strain ATCC 29148 / DSM 2079 / NCTC 10582 / E50 / VPI-5482) OX=226186 GN=BT_3983 PE=3 SV=1	208885	64377.6	NA	16327.3	NA
Q8A7H9	Cyclic nucleotide-binding domain-containing protein OS=Bacteroides thetaiotaomicron (strain ATCC 29148 / DSM 2079 / NCTC 10582 / E50 / VPI-5482) OX=226186 GN=BT_1545 PE=4 SV=1	71846.7	85207.2	154360	172445	NA
Q8A443	Corrinoid adenosyltransferase OS=Bacteroides thetaiotaomicron (strain ATCC 29148 / DSM 2079 / NCTC 10582 / E50 / VPI-5482) OX=226186 GN=BT_2760 PE=3 SV=1	351572	354956	NA	428732	335542
Q8A442	Uncharacterized protein OS=Bacteroides thetaiotaomicron (strain ATCC 29148 / DSM 2079 / NCTC 10582 / E50 / VPI-5482) OX=226186 GN=BT_2761 PE=4 SV=1	108887	327872	NA	156784	200198
Q8A7P3	Uncharacterized protein OS=Bacteroides thetaiotaomicron (strain ATCC 29148 / DSM 2079 / NCTC 10582 / E50 / VPI-5482) OX=226186 GN=BT_1481 PE=4 SV=1	430542	NA	152884	393156	NA
Q8AB56	UPF0033 domain-containing protein OS=Bacteroides thetaiotaomicron (strain ATCC 29148 / DSM 2079 / NCTC 10582 / E50 / VPI-5482) OX=226186 GN=BT_0255 PE=3 SV=1	323314	454273	457164	108998	305861
Q8A2F5	Chondroitin sulfate ABC lyase OS=Bacteroides thetaiotaomicron (strain ATCC 29148 / DSM 2079 / NCTC 10582 / E50 / VPI-5482) OX=226186 GN=BT_3350 PE=3 SV=1	187076	170573	NA	142143	NA
Q89Z21	NfeD domain-containing protein OS=Bacteroides thetaiotaomicron (strain ATCC 29148 / DSM 2079 / NCTC 10582 / E50 / VPI-5482) OX=226186 GN=BT_4556 PE=4 SV=1	NA	NA	35438.2	20902.1	669947
Q8AA81	Putative outer membrane protein OS=Bacteroides thetaiotaomicron (strain ATCC 29148 / DSM 2079 / NCTC 10582 / E50 / VPI-5482) OX=226186 GN=BT_0584 PE=4 SV=1	NA	139374	NA	84055.3	130297
Q8A2F6	Endo-4-O-sulfatase OS=Bacteroides thetaiotaomicron (strain ATCC 29148 / DSM 2079 / NCTC 10582 / E50 / VPI-5482) OX=226186 GN=BT_3349 PE=1 SV=1	NA	374849	382780	226888	273353
Q8A9M7	Succinate--CoA ligase [ADP-forming] subunit beta OS=Bacteroides thetaiotaomicron (strain ATCC 29148 / DSM 2079 / NCTC 10582 / E50 / VPI-5482) OX=226186 GN=sucC PE=3 SV=1	182000	48711.7	94078.8	201332	135082
Q8A700	Putative transcriptional regulator OS=Bacteroides thetaiotaomicron (strain ATCC 29148 / DSM 2079 / NCTC 10582 / E50 / VPI-5482) OX=226186 GN=BT_1725 PE=4 SV=1	286191	126675	135949	629981	326475
Q8AAN8	4Fe-4S ferredoxin, iron-sulfur binding-like protein OS=Bacteroides thetaiotaomicron (strain ATCC 29148 / DSM 2079 / NCTC 10582 / E50 / VPI-5482) OX=226186 GN=BT_0426 PE=4 SV=1	8364.79	91684.7	NA	30217.4	33257.7
Q8ABM8	Uncharacterized protein OS=Bacteroides thetaiotaomicron (strain ATCC 29148 / DSM 2079 / NCTC 10582 / E50 / VPI-5482) OX=226186 GN=BT_0082 PE=4 SV=1	NA	NA	326388	333293	410130
Q8A6V0	Beta-galactosidase OS=Bacteroides thetaiotaomicron (strain ATCC 29148 / DSM 2079 / NCTC 10582 / E50 / VPI-5482) OX=226186 GN=BT_1776 PE=3 SV=1	62778.4	154085	290024	156218	201785
Q8A9D8	Ferredoxin domain containing protein OS=Bacteroides thetaiotaomicron (strain ATCC 29148 / DSM 2079 / NCTC 10582 / E50 / VPI-5482) OX=226186 GN=BT_0877 PE=4 SV=1	104633	78758.9	67284.4	NA	NA
Q8A9Y0	Putative Na+/H+ exchanger OS=Bacteroides thetaiotaomicron (strain ATCC 29148 / DSM 2079 / NCTC 10582 / E50 / VPI-5482) OX=226186 GN=BT_0685 PE=4 SV=1	500003	687241	624209	512650	NA
Q8A3D1	Uncharacterized protein OS=Bacteroides thetaiotaomicron (strain ATCC 29148 / DSM 2079 / NCTC 10582 / E50 / VPI-5482) OX=226186 GN=BT_3023 PE=4 SV=1	112039	NA	94313.6	35846.2	NA
Q8A041	Acetyl xylan esterase A OS=Bacteroides thetaiotaomicron (strain ATCC 29148 / DSM 2079 / NCTC 10582 / E50 / VPI-5482) OX=226186 GN=BT_4180 PE=4 SV=1	155395	136357	238030	NA	148013
Q8A7R7	Two-component system response regulator OS=Bacteroides thetaiotaomicron (strain ATCC 29148 / DSM 2079 / NCTC 10582 / E50 / VPI-5482) OX=226186 GN=BT_1457 PE=4 SV=1	176575	194190	200900	139166	111055
Q8A642	RNA polymerase sigma factor OS=Bacteroides thetaiotaomicron (strain ATCC 29148 / DSM 2079 / NCTC 10582 / E50 / VPI-5482) OX=226186 GN=BT_2044 PE=3 SV=1	169857	220773	84032.3	39130.9	NA
Q8A5Y9	Six-hairpin glycosidase OS=Bacteroides thetaiotaomicron (strain ATCC 29148 / DSM 2079 / NCTC 10582 / E50 / VPI-5482) OX=226186 GN=BT_2097 PE=4 SV=1	257673	197519	248369	249607	NA
Q8A6Y0	Uncharacterized protein OS=Bacteroides thetaiotaomicron (strain ATCC 29148 / DSM 2079 / NCTC 10582 / E50 / VPI-5482) OX=226186 GN=BT_1745 PE=4 SV=1	NA	NA	28755.4	134673	35071.7
Q8A729	Oxaloacetate decarboxylase beta chain OS=Bacteroides thetaiotaomicron (strain ATCC 29148 / DSM 2079 / NCTC 10582 / E50 / VPI-5482) OX=226186 GN=BT_1696 PE=4 SV=1	3834.8	66633.5	48150	16016	25532.8
Q89ZI2	O-GlcNAcase BT_4395 OS=Bacteroides thetaiotaomicron (strain ATCC 29148 / DSM 2079 / NCTC 10582 / E50 / VPI-5482) OX=226186 GN=BT_4395 PE=1 SV=1	NA	205016	322801	NA	167345
Q89YL2	Uncharacterized protein OS=Bacteroides thetaiotaomicron (strain ATCC 29148 / DSM 2079 / NCTC 10582 / E50 / VPI-5482) OX=226186 GN=BT_4719 PE=4 SV=1	230999	233967	198959	194743	123695
Q8A325	Alpha-1,2-mannosidase, putative OS=Bacteroides thetaiotaomicron (strain ATCC 29148 / DSM 2079 / NCTC 10582 / E50 / VPI-5482) OX=226186 GN=BT_3130 PE=1 SV=1	1.07902e+06	707347	688768	1.28594e+06	673307
Q89YU8	SusD homolog OS=Bacteroides thetaiotaomicron (strain ATCC 29148 / DSM 2079 / NCTC 10582 / E50 / VPI-5482) OX=226186 GN=BT_4633 PE=3 SV=1	2.05631e+06	532498	497024	1.50181e+06	859877
Q8A4H2	Putative cell surface protein, have conserved domain OS=Bacteroides thetaiotaomicron (strain ATCC 29148 / DSM 2079 / NCTC 10582 / E50 / VPI-5482) OX=226186 GN=BT_2627 PE=4 SV=1	5195.72	16117.3	1903.22	6789.18	NA
Q8A6I6	Uncharacterized protein OS=Bacteroides thetaiotaomicron (strain ATCC 29148 / DSM 2079 / NCTC 10582 / E50 / VPI-5482) OX=226186 GN=BT_1898 PE=4 SV=1	2486.34	NA	1469.59	4693.8	6416.82
Q8A4C3	Beta-galactosidase OS=Bacteroides thetaiotaomicron (strain ATCC 29148 / DSM 2079 / NCTC 10582 / E50 / VPI-5482) OX=226186 GN=BT_2680 PE=3 SV=1	364926	398501	373047	119278	346951
Q89ZK8	Uncharacterized protein OS=Bacteroides thetaiotaomicron (strain ATCC 29148 / DSM 2079 / NCTC 10582 / E50 / VPI-5482) OX=226186 GN=BT_4369 PE=4 SV=1	655627	336119	249177	657456	286627
Q8A743	SusD homolog OS=Bacteroides thetaiotaomicron (strain ATCC 29148 / DSM 2079 / NCTC 10582 / E50 / VPI-5482) OX=226186 GN=BT_1682 PE=3 SV=1	3509.42	98254.9	8172.52	4602.21	10515.4
Q8A3I3	Two-component system sensor histidine kinase/response regulator, hybrid (One-component system) OS=Bacteroides thetaiotaomicron (strain ATCC 29148 / DSM 2079 / NCTC 10582 / E50 / VPI-5482) OX=226186 GN=BT_2971 PE=4 SV=1	275568	473786	416403	822919	NA
Q8A9Y5	Cation efflux system protein czcA OS=Bacteroides thetaiotaomicron (strain ATCC 29148 / DSM 2079 / NCTC 10582 / E50 / VPI-5482) OX=226186 GN=BT_0680 PE=3 SV=1	39029.4	NA	16656.6	84765.6	26286.7
Q8ABB2	Putative lipoprotein OS=Bacteroides thetaiotaomicron (strain ATCC 29148 / DSM 2079 / NCTC 10582 / E50 / VPI-5482) OX=226186 GN=BT_0198 PE=4 SV=1	NA	27060.8	2614.54	1692.61	NA
Q8A929	Magnesium-transporting ATPase, P-type 1 OS=Bacteroides thetaiotaomicron (strain ATCC 29148 / DSM 2079 / NCTC 10582 / E50 / VPI-5482) OX=226186 GN=BT_0988 PE=3 SV=1	23142.3	NA	729.778	NA	2351.69
Q8A4B1	Imidazolonepropionase OS=Bacteroides thetaiotaomicron (strain ATCC 29148 / DSM 2079 / NCTC 10582 / E50 / VPI-5482) OX=226186 GN=hutI PE=3 SV=1	NA	7872.55	956.889	NA	15245
Q8A9M8	Succinate--CoA ligase [ADP-forming] subunit alpha OS=Bacteroides thetaiotaomicron (strain ATCC 29148 / DSM 2079 / NCTC 10582 / E50 / VPI-5482) OX=226186 GN=sucD PE=3 SV=1	NA	NA	6391.77	10074	10718.5
Q8A4A9	Urocanate hydratase OS=Bacteroides thetaiotaomicron (strain ATCC 29148 / DSM 2079 / NCTC 10582 / E50 / VPI-5482) OX=226186 GN=hutU PE=3 SV=1	6182.25	14603.5	NA	5653.62	7213.24
Q8A0Z0	Putative outer membrane protein OS=Bacteroides thetaiotaomicron (strain ATCC 29148 / DSM 2079 / NCTC 10582 / E50 / VPI-5482) OX=226186 GN=BT_3881 PE=4 SV=1	NA	134190	NA	508299	105542
