# Supplementary material for: Adaptation and Resistance: How Bacteroides thetaiotaomicron Copes with the Bisphenol A Substitute Bisphenol F
Source: Microorganisms. 2022 Aug 9;10(8):1610. doi: 10.3390/microorganisms10081610 (PMC9414779; doi:10.3390/microorganisms10081610)
Supplement: Supplementary file 1 [file microorganisms-10-01610-s001.zip › Supplementary Material Table S6_KEGG pathway analysis.xlsx]

## Sheet: Tabelle1
KEGG_Pathway	pvalue	pvalue.adj	treat_1	treat_2	treat_3	treat_4	treat_5	control1	control2	control3	control4	control5	control_mean	treat_mean	log2 Fold Change
Metabolic pathways	0.617509	0.689058	38.2144	38.34	38.3174	38.2329	37.1096	37.9746	37.577	36.3189	38.2512	38.8285	37.7901	38.0429	0.00961985
Starch and sucrose metabolism	0.0169878	0.0451518	1.81877	1.97422	1.89407	1.88655	1.87012	1.83644	1.76449	1.70035	1.83984	1.75512	1.77925	1.88875	0.0861606
Nitrogen metabolism	9.92151e-05	0.00111341	0.679032	0.695495	0.663263	0.672977	0.720624	0.809009	0.859347	0.817345	0.778194	0.798835	0.812546	0.686278	-0.243656
Alanine, aspartate and glutamate metabolism	0.00045974	0.00361708	2.37587	2.4075	2.43958	2.47186	2.35625	2.67266	2.78209	2.62861	2.67748	2.57444	2.66706	2.41021	-0.146088
Arginine biosynthesis	5.44447e-06	0.000183297	0.830426	0.86007	0.824412	0.827385	0.86337	0.998418	1.00921	0.988812	0.980296	0.949832	0.985314	0.841133	-0.22825
Microbial metabolism in diverse environments	0.764819	0.813123	22.3345	22.4726	22.3587	22.3201	21.9135	22.4025	21.6661	21.568	22.4912	22.8518	22.1959	22.2799	0.00544687
Homologous recombination	0.0670475	0.133668	0.368969	0.320169	0.33496	0.349242	0.303676	0.361006	0.363121	0.350873	0.356175	0.408752	0.367985	0.335403	-0.133753
Cysteine and methionine metabolism	0.00756235	0.0246386	2.81496	2.78816	2.88591	2.78844	2.73273	2.60443	2.66932	2.46487	2.71379	2.50241	2.59096	2.80204	0.112988
Butanoate metabolism	2.61142e-05	0.000527506	3.10534	3.19299	2.97027	3.01051	3.02773	3.46132	3.52683	3.50178	3.46887	3.65924	3.52361	3.06137	-0.202876
Propanoate metabolism	0.0556171	0.114639	2.15972	1.98856	2.1142	2.07406	1.87596	2.11657	2.42174	2.15548	2.20677	2.65641	2.31139	2.0425	-0.178427
Pyruvate metabolism	0.306984	0.430631	8.23761	8.15224	8.62383	8.12868	7.82941	8.06172	7.70971	7.55852	8.15089	8.40338	7.97684	8.19435	0.0388121
Cyanoamino acid metabolism	0.000465565	0.00361708	0.180532	0.198154	0.188332	0.204735	0.216015	0.249645	0.265436	0.256924	0.255375	0.224853	0.250447	0.197554	-0.342259
Biosynthesis of various plant secondary metabolites	0.0411459	0.0914625	0.145564	0.156294	0.148555	0.165958	0.157211	0.176699	0.216174	0.18186	0.176794	0.158546	0.182015	0.154716	-0.234429
Biosynthesis of secondary metabolites	0.29164	0.414869	27.4593	27.7205	27.7089	27.5497	26.8115	27.3385	26.5456	26.0652	27.4846	27.7547	27.0377	27.45	0.021832
Ubiquinone and other terpenoid-quinone biosynthesis	0.173695	0.287593	0.0352879	0.028213	0.0335591	0.0298108	0.0288536	0.033346	0.0349239	0.0297849	0.0338325	0.0391409	0.0342056	0.0311449	-0.13524
Biosynthesis of cofactors	0.0226683	0.0572375	4.77705	4.89169	4.8281	4.89374	4.65481	5.11841	5.14289	4.81939	5.14728	4.95597	5.03679	4.80908	-0.0667433
Other glycan degradation	0.00285301	0.0106724	0.0653709	0.0672078	0.0592253	0.0614675	0.0683093	0.0563191	0.0531418	0.0530443	0.0579091	0.0543617	0.0549552	0.0643161	0.226925
Mismatch repair	0.863791	0.890233	0.286924	0.239035	0.259305	0.272284	0.233501	0.255112	0.264109	0.247186	0.248267	0.287427	0.26042	0.25821	-0.0122965
Glycine, serine and threonine metabolism	0.334223	0.432776	1.68675	1.76814	1.7078	1.73201	1.70019	1.67142	1.7107	1.62776	1.72215	1.73676	1.69376	1.71898	0.0213239
Biosynthesis of amino acids	0.419297	0.520811	11.2168	11.4257	11.076	11.4414	11.0579	11.1885	11.0053	10.7931	11.2966	11.3677	11.1302	11.2436	0.0146138
Carbon metabolism	0.0381624	0.0896373	18.4466	18.7296	18.5687	18.5825	18.1951	18.2216	17.2665	17.3753	18.2275	18.1858	17.8553	18.5045	0.0515202
Phenylalanine, tyrosine and tryptophan biosynthesis	0.412778	0.520811	0.532938	0.578495	0.557927	0.522143	0.528345	0.550941	0.574836	0.535055	0.57395	0.542776	0.555512	0.543969	-0.0302916
Base excision repair	0.000361274	0.00331715	0.0982252	0.0945837	0.0934689	0.0970189	0.0945047	0.103479	0.103852	0.1028	0.106115	0.100165	0.103282	0.0955603	-0.112107
RNA degradation	0.0017399	0.00812015	3.86169	3.67366	4.00128	3.67173	3.58702	3.21429	3.46962	3.267	3.24021	3.3748	3.31318	3.75908	0.18216
Lysine biosynthesis	0.0275185	0.0661754	0.861882	0.842721	0.866522	0.839492	0.81746	0.90871	0.938558	0.843488	0.945372	0.991952	0.925616	0.845615	-0.130412
Lysine degradation	0.200941	0.31897	0.141034	0.135102	0.136874	0.138635	0.135294	0.145502	0.134833	0.135871	0.145412	0.144555	0.141235	0.137388	-0.0398412
Bacterial secretion system	0.00126469	0.00709634	0.664131	0.651919	0.666902	0.672656	0.675772	0.569124	0.569844	0.601018	0.612348	0.542859	0.579039	0.666276	0.20246
Protein export	0.00119744	0.00709634	0.680615	0.666595	0.677624	0.684584	0.692698	0.579939	0.578768	0.613028	0.623713	0.552959	0.589681	0.680423	0.206497
Quorum sensing	0.000114307	0.0011545	0.868328	0.8673	0.888823	0.877917	0.866355	0.739486	0.743574	0.748726	0.790718	0.724231	0.749347	0.873745	0.221578
Ribosome	0.068819	0.133668	15.1071	15.1516	14.4707	15.1749	17.1055	17.0773	16.7086	18.5883	16.1851	15.5709	16.826	15.402	-0.127581
One carbon pool by folate	0.00259801	0.0100923	0.538481	0.545403	0.554653	0.558582	0.554282	0.613566	0.602616	0.577244	0.621748	0.582673	0.599569	0.55028	-0.12376
Glyoxylate and dicarboxylate metabolism	0.0422727	0.0914625	2.2478	2.21615	2.35906	2.30361	2.14014	2.08065	2.17268	1.97652	2.19783	2.16964	2.11946	2.25335	0.0883722
Purine metabolism	0.00093731	0.00631122	4.21513	4.15423	4.11971	4.11594	4.00043	4.63304	4.5969	4.38024	4.63969	4.83253	4.61648	4.12109	-0.163768
Glycolysis / Gluconeogenesis	0.251475	0.379088	13.7445	14.019	13.8711	13.9032	13.8475	14.0118	12.7884	13.4167	13.9212	13.75	13.5776	13.8771	0.0314739
Methane metabolism	0.0676925	0.133668	5.40468	5.03217	5.18378	5.19078	4.65854	4.44074	4.72321	4.43201	4.62515	5.22593	4.68941	5.09399	0.11939
Pyrimidine metabolism	6.27685e-05	0.00090566	2.27478	2.31604	2.20557	2.33665	2.23225	2.65794	2.7228	2.517	2.69191	2.71549	2.66103	2.27306	-0.227349
beta-Lactam resistance	5.58166e-08	5.63747e-06	0.165143	0.157744	0.164892	0.151561	0.145636	0.0408749	0.0380962	0.0496458	0.0487545	0.0394111	0.0433565	0.156995	1.8564
Vitamin B6 metabolism	0.00476613	0.0165993	0.232247	0.255715	0.232687	0.222066	0.230105	0.212813	0.179961	0.179793	0.216037	0.190422	0.195805	0.234564	0.260563
Folate biosynthesis	0.00515186	0.0173446	0.314042	0.317338	0.323498	0.307761	0.314965	0.340433	0.346515	0.32078	0.336008	0.344855	0.337718	0.315521	-0.098086
Porphyrin metabolism	0.422837	0.520811	0.24867	0.263968	0.256673	0.245298	0.229213	0.236299	0.249119	0.19879	0.253069	0.255183	0.238492	0.248764	0.0608402
Pentose and glucuronate interconversions	0.255807	0.379948	0.269061	0.250267	0.241601	0.26783	0.262117	0.259192	0.224753	0.256165	0.263881	0.220947	0.244988	0.258175	0.0756408
Pentose phosphate pathway	0.981542	0.981542	4.83234	4.45147	4.48809	4.50297	4.14405	4.31806	4.32275	4.3065	4.42389	5.06962	4.48816	4.48378	-0.00140847
Thiamine metabolism	0.00176875	0.00812015	0.408286	0.369241	0.37214	0.381377	0.373807	0.477704	0.447401	0.423116	0.466593	0.504838	0.46393	0.38097	-0.284231
Aminoacyl-tRNA biosynthesis	0.0743135	0.141616	4.39171	4.47603	4.28067	4.32848	4.30071	4.49734	4.63167	4.33442	4.45721	4.47218	4.47857	4.35552	-0.040192
Two-component system	0.152568	0.265678	0.35035	0.336283	0.34982	0.340405	0.318231	0.355645	0.371492	0.320483	0.363226	0.38161	0.358491	0.339018	-0.0805762
Amino sugar and nucleotide sugar metabolism	0.0145431	0.0408015	2.65871	2.72646	2.71274	2.68907	2.56233	2.55869	2.55413	2.3922	2.60177	2.51792	2.52494	2.66986	0.0805159
Selenocompound metabolism	3.47781e-05	0.000585432	0.466195	0.440557	0.444136	0.429416	0.421728	0.366668	0.372063	0.342692	0.356247	0.346953	0.356925	0.440407	0.303217
Lipopolysaccharide biosynthesis	0.694345	0.746052	0.26011	0.257788	0.256598	0.259742	0.251772	0.245581	0.271865	0.241558	0.258232	0.286651	0.260777	0.257202	-0.0199152
Biosynthesis of nucleotide sugars	0.0106588	0.0326224	2.44197	2.51066	2.4959	2.49828	2.37714	2.37109	2.36556	2.25654	2.4118	2.30574	2.34215	2.46479	0.0736352
beta-Alanine metabolism	0.282462	0.413458	0.0415209	0.0397021	0.0411416	0.0378302	0.0390584	0.0443926	0.0373168	0.0424535	0.0433877	0.0401683	0.0415438	0.0398507	-0.0600291
Pantothenate and CoA biosynthesis	0.0132297	0.0385704	0.2455	0.255375	0.251298	0.23549	0.239592	0.271791	0.248555	0.262651	0.270114	0.280406	0.266704	0.245451	-0.119802
Histidine metabolism	0.138235	0.244943	0.0816561	0.078587	0.0746329	0.0749831	0.0684229	0.0801902	0.0950239	0.074559	0.0798794	0.111452	0.0882208	0.0756564	-0.221657
Riboflavin metabolism	0.0252446	0.0621879	0.162796	0.200894	0.169309	0.178176	0.194558	0.216206	0.220693	0.221347	0.211783	0.180358	0.210077	0.181146	-0.213765
Galactose metabolism	9.81351e-05	0.00111341	1.38897	1.39153	1.41244	1.42959	1.38632	1.26715	1.25412	1.24741	1.26062	1.18045	1.24195	1.40177	0.174641
Sphingolipid metabolism	0.00237406	0.0095912	0.0609296	0.0634766	0.0562944	0.0570361	0.06443	0.052885	0.0494606	0.049356	0.0538065	0.0503927	0.0511802	0.0604333	0.239759
Fatty acid metabolism	0.32813	0.432776	2.03901	2.02951	2.15391	2.05807	1.89465	1.94337	2.06399	1.85257	1.99873	2.02726	1.97718	2.03503	0.0416031
Fatty acid biosynthesis	0.32813	0.432776	2.03901	2.02951	2.15391	2.05807	1.89465	1.94337	2.06399	1.85257	1.99873	2.02726	1.97718	2.03503	0.0416031
Cationic antimicrobial peptide (CAMP) resistance	1.60652e-06	8.11293e-05	0.211833	0.196758	0.207989	0.193811	0.184877	0.074724	0.074808	0.0809331	0.0854263	0.0777854	0.0787354	0.199054	1.33807
Lipoic acid metabolism	0.592337	0.678979	0.00255918	0.00361393	0.0023871	0.00385651	0.00155198	0.00195037	0.00563625	0.00152864	0.00167863	0.00645108	0.00344899	0.00279374	-0.30398
Biotin metabolism	0.450366	0.541512	1.21198	1.18875	1.26212	1.22191	1.14257	1.26177	1.22378	1.1618	1.25248	1.23217	1.2264	1.20547	-0.0248415
Vancomycin resistance	0.0162114	0.0442527	0.0994034	0.0931302	0.0968767	0.0931421	0.0906928	0.0916475	0.0777065	0.0780776	0.0885992	0.0851982	0.0842458	0.094649	0.167983
Peptidoglycan biosynthesis	0.182325	0.297013	0.21926	0.215845	0.21944	0.21367	0.221094	0.22331	0.214359	0.211076	0.208971	0.208821	0.213308	0.217862	0.030478
D-Amino acid metabolism	0.220386	0.342445	0.205431	0.176622	0.195177	0.192286	0.175087	0.174797	0.180206	0.167488	0.176298	0.196033	0.178964	0.188921	0.0781093
Terpenoid backbone biosynthesis	0.782284	0.823028	0.107924	0.101056	0.109713	0.106832	0.0931794	0.0960155	0.110674	0.0976036	0.104526	0.116997	0.105163	0.103741	-0.0196484
Oxidative phosphorylation	0.00105995	0.0066909	2.01975	2.12287	1.89743	1.94384	2.05162	1.81353	1.75536	1.79275	1.74119	1.6498	1.75052	2.0071	0.197325
Glutathione metabolism	0.000503874	0.00363509	0.203711	0.221587	0.221704	0.227394	0.220412	0.260747	0.268371	0.243047	0.263357	0.245365	0.256177	0.218961	-0.226467
Nicotinate and nicotinamide metabolism	0.0425618	0.0914625	0.190506	0.190191	0.204321	0.198291	0.178695	0.202345	0.212618	0.195737	0.210401	0.230879	0.210396	0.192401	-0.128992
Arachidonic acid metabolism	0.0206158	0.0533898	0.000128305	0.000177984	0.000150102	0.000108723	0.000114265	0.000185338	0.000181745	0.000183698	0.000170836	0.000187844	0.000181892	0.000135876	-0.420794
Fructose and mannose metabolism	0.517478	0.607229	5.09578	4.6463	4.80649	4.88831	4.46813	4.47007	4.61312	4.60814	4.54747	5.1302	4.6738	4.781	0.0327171
O-Antigen nucleotide sugar biosynthesis	0.0831365	0.155496	1.12037	1.12264	1.07865	1.1395	1.08014	1.08401	1.09306	1.03035	1.0934	1.07274	1.07471	1.10826	0.0443416
Sulfur metabolism	1.44569e-05	0.000365037	0.455421	0.420727	0.454549	0.405182	0.387627	0.250998	0.270704	0.221011	0.258375	0.286167	0.257451	0.424701	0.72215
DNA replication	0.311752	0.431329	0.257765	0.225417	0.237001	0.251372	0.21923	0.24484	0.248298	0.24008	0.239134	0.267061	0.247883	0.238157	-0.0577466
Inositol phosphate metabolism	0.155419	0.266056	1.03795	1.08242	1.14755	1.17213	1.07888	1.08862	1.07376	1.0883	1.03544	0.938192	1.04487	1.10379	0.0791452
Citrate cycle (TCA cycle)	0.0555208	0.114639	7.60807	7.73824	7.91326	7.52306	7.49724	7.58781	6.8675	7.04085	7.51859	7.38952	7.28085	7.65598	0.0724786
Valine, leucine and isoleucine biosynthesis	0.323653	0.432776	0.28852	0.290613	0.296047	0.287932	0.271465	0.292832	0.287405	0.28439	0.29044	0.320205	0.295054	0.286915	-0.0403568
Valine, leucine and isoleucine degradation	0.287524	0.414856	0.550324	0.508712	0.545774	0.53721	0.502451	0.479804	0.497347	0.490315	0.487303	0.574154	0.505785	0.528894	0.0644562
2-Oxocarboxylic acid metabolism	0.00205998	0.0086691	0.796103	0.853908	0.855954	0.833527	0.792353	0.923019	0.933897	0.861204	0.951999	0.924576	0.918939	0.826369	-0.153183
Sulfur relay system	0.013366	0.0385704	0.00283139	0.00229058	0.00297372	0.00300911	0.00264996	0.00212	0.00259594	0.00208631	0.00202323	0.00225547	0.00221619	0.00275095	0.311847
ABC transporters	0.620835	0.689058	0.0471795	0.113656	0.04797	0.0497727	0.102568	0.10599	0.0410773	0.128109	0.108143	0.0389337	0.0844506	0.0722293	-0.225523
RNA polymerase	0.00356101	0.0128451	1.88256	1.96509	1.91498	1.96991	1.84785	2.10753	2.10517	1.95834	2.13506	2.09143	2.07951	1.91608	-0.118085
Arginine and proline metabolism	0.11516	0.207698	0.357747	0.3477	0.346251	0.341463	0.309883	0.346549	0.377951	0.337512	0.364845	0.379	0.361172	0.340609	-0.0845686
Carbapenem biosynthesis	0.598308	0.678979	0.00408756	0.00402866	0.00393574	0.00376982	0.00292605	0.00299016	0.00405424	0.00318941	0.00292844	0.0045271	0.00353787	0.00374957	0.0838432
Taurine and hypotaurine metabolism	0.439611	0.534948	0.33023	0.289869	0.311183	0.342379	0.279605	0.30263	0.351624	0.303047	0.302003	0.3707	0.326001	0.310653	-0.0695713
Monobactam biosynthesis	0.330833	0.432776	0.530029	0.566212	0.537049	0.540711	0.525062	0.507157	0.555987	0.489464	0.542196	0.530988	0.525158	0.539813	0.0397062
Biosynthesis of various antibiotics	0.974925	0.981542	0.497629	0.444257	0.608571	0.498916	0.451423	0.451199	0.483761	0.418026	0.517066	0.638543	0.501719	0.500159	-0.00449241
Phenylalanine metabolism	0.00836609	0.0264055	0.233853	0.233253	0.243396	0.221588	0.20685	0.24793	0.270037	0.241449	0.262913	0.259419	0.25635	0.227788	-0.170421
Nucleotide excision repair	0.495704	0.589013	0.131618	0.142621	0.139455	0.137508	0.143096	0.14551	0.146252	0.135587	0.143806	0.134745	0.14118	0.13886	-0.0239082
Tryptophan metabolism	0.171948	0.287593	0.00896178	0.00937184	0.00882798	0.00792744	0.00763312	0.00744917	0.00733986	0.00744043	0.00716887	0.00937648	0.00775496	0.00854443	0.139865
Glycerophospholipid metabolism	0.00187065	0.00821459	0.0553427	0.048573	0.0579539	0.0582596	0.0579093	0.045879	0.042497	0.0440752	0.0425995	0.0454713	0.0441044	0.0556077	0.334362
Flagellar assembly	0.972936	0.981542	0.0507358	0.0631774	0.0469516	0.0468884	0.053421	0.0529823	0.0576139	0.0553962	0.0547113	0.0397052	0.0520818	0.0522348	0.00423365
Glycerolipid metabolism	0.669329	0.726906	0.000112652	0.0002194	0.000196517	0.000194797	5.16504e-05	1.17462e-05	4.55834e-05	0.000177909	0.000250139	0.000168528	0.000130781	0.000155003	0.245143
Streptomycin biosynthesis	0.039691	0.0911089	0.805338	0.894015	0.824097	0.864705	0.881062	0.837432	0.802569	0.802013	0.805886	0.749999	0.79958	0.853843	0.094729
C5-Branched dibasic acid metabolism	0.226707	0.34693	0.109528	0.116618	0.111079	0.113915	0.0989454	0.101139	0.108833	0.0952521	0.10179	0.113966	0.104196	0.110017	0.0784259
Neomycin, kanamycin and gentamicin biosynthesis	0.847245	0.882183	0.159071	0.188471	0.170761	0.198186	0.203949	0.188137	0.203992	0.20481	0.183794	0.15236	0.186618	0.184088	-0.0196998
Novobiocin biosynthesis	0.00166879	0.00812015	0.186002	0.195132	0.196431	0.176462	0.172036	0.21327	0.222743	0.206733	0.225567	0.206342	0.214931	0.185213	-0.21469
Tyrosine metabolism	0.00166879	0.00812015	0.186002	0.195132	0.196431	0.176462	0.172036	0.21327	0.222743	0.206733	0.225567	0.206342	0.214931	0.185213	-0.21469
Benzoate degradation	0.403724	0.516153	0.0300917	0.0473363	0.0336689	0.0215012	0.0248314	0.0228474	0.0311725	0.0258146	0.022345	0.0328575	0.0270074	0.0314859	0.221351
Polyketide sugar unit biosynthesis	0.100885	0.185262	0.107059	0.114474	0.0986911	0.115868	0.107952	0.112444	0.123046	0.112519	0.115007	0.115475	0.115698	0.108809	-0.0885727
Acarbose and validamycin biosynthesis	0.20212	0.31897	0.0922736	0.0926425	0.0827844	0.093897	0.0869268	0.0914219	0.0940559	0.0898891	0.093244	0.0972684	0.0931758	0.0897049	-0.0547697
Phosphonate and phosphinate metabolism	0.638501	0.700963	0.0194008	0.0193808	0.0195799	0.0222321	0.0192085	0.0197706	0.0205559	0.0186423	0.0199429	0.0192734	0.019637	0.0199604	0.0235674
Ascorbate and aldarate metabolism	0.523059	0.607229	0.0977751	0.108006	0.0915144	0.100604	0.0950997	0.104226	0.0988099	0.103268	0.106109	0.0928391	0.10105	0.0985999	-0.0354146
