# Supplementary figures and images for: Adaptation and Resistance: How Bacteroides thetaiotaomicron Copes with the Bisphenol A Substitute Bisphenol F
Source: MDPI journal article supplement (doi:10.3390/microorganisms10081610), 2022-08-09

Supplementary Figure S4 – FAME BPS

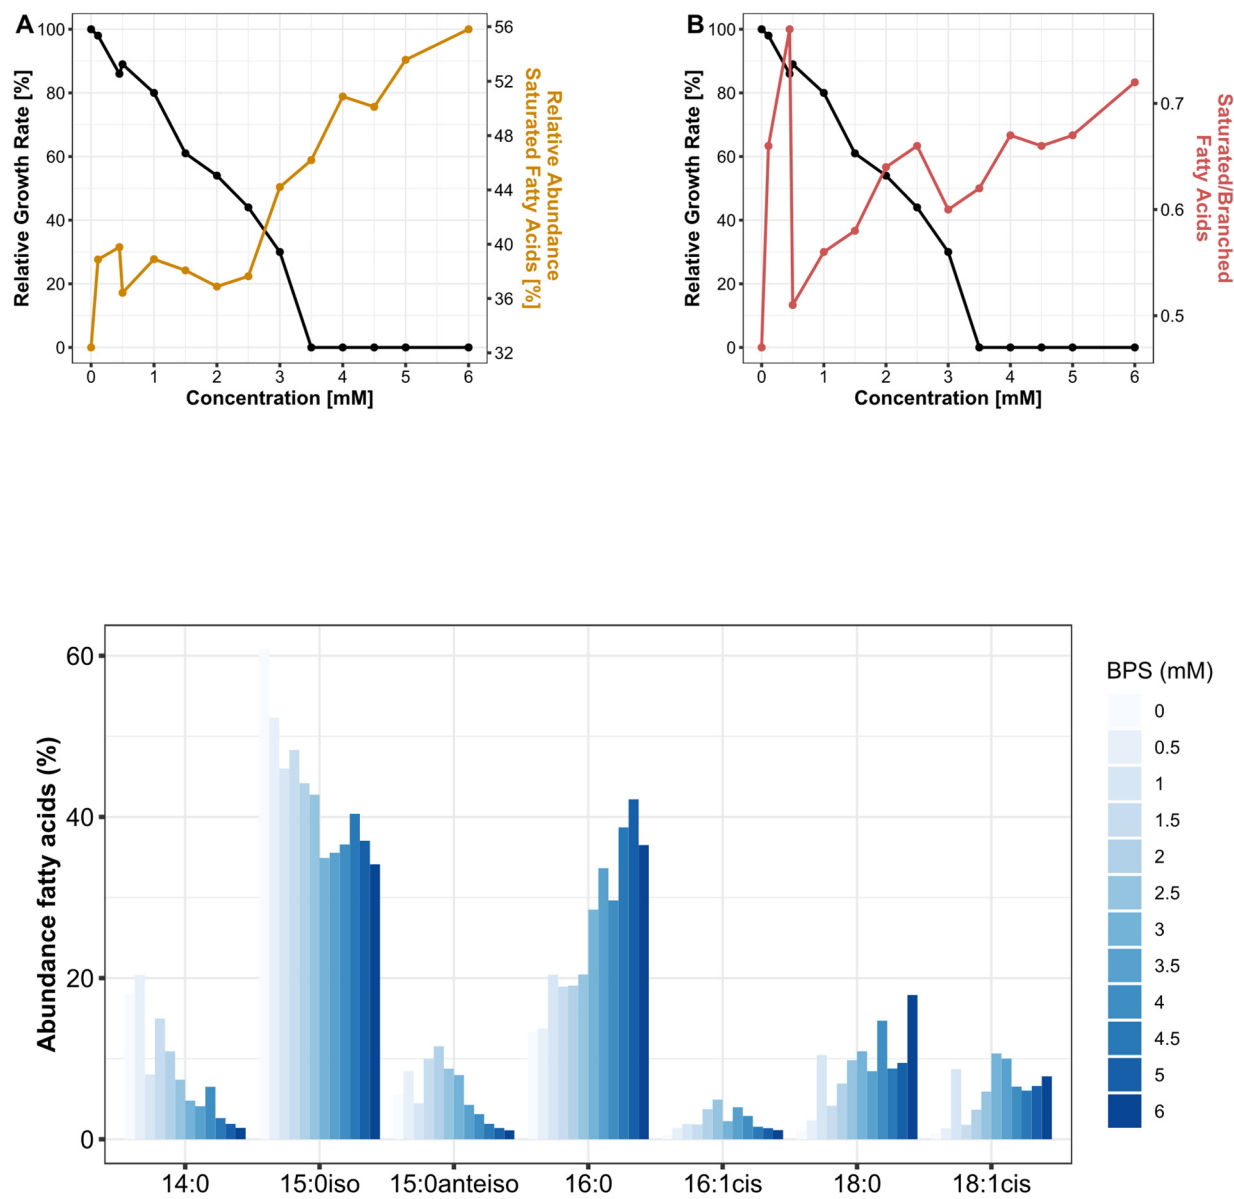

Supplement: s1 [file s1]

Supplementary Figure S3 – FAME BPA

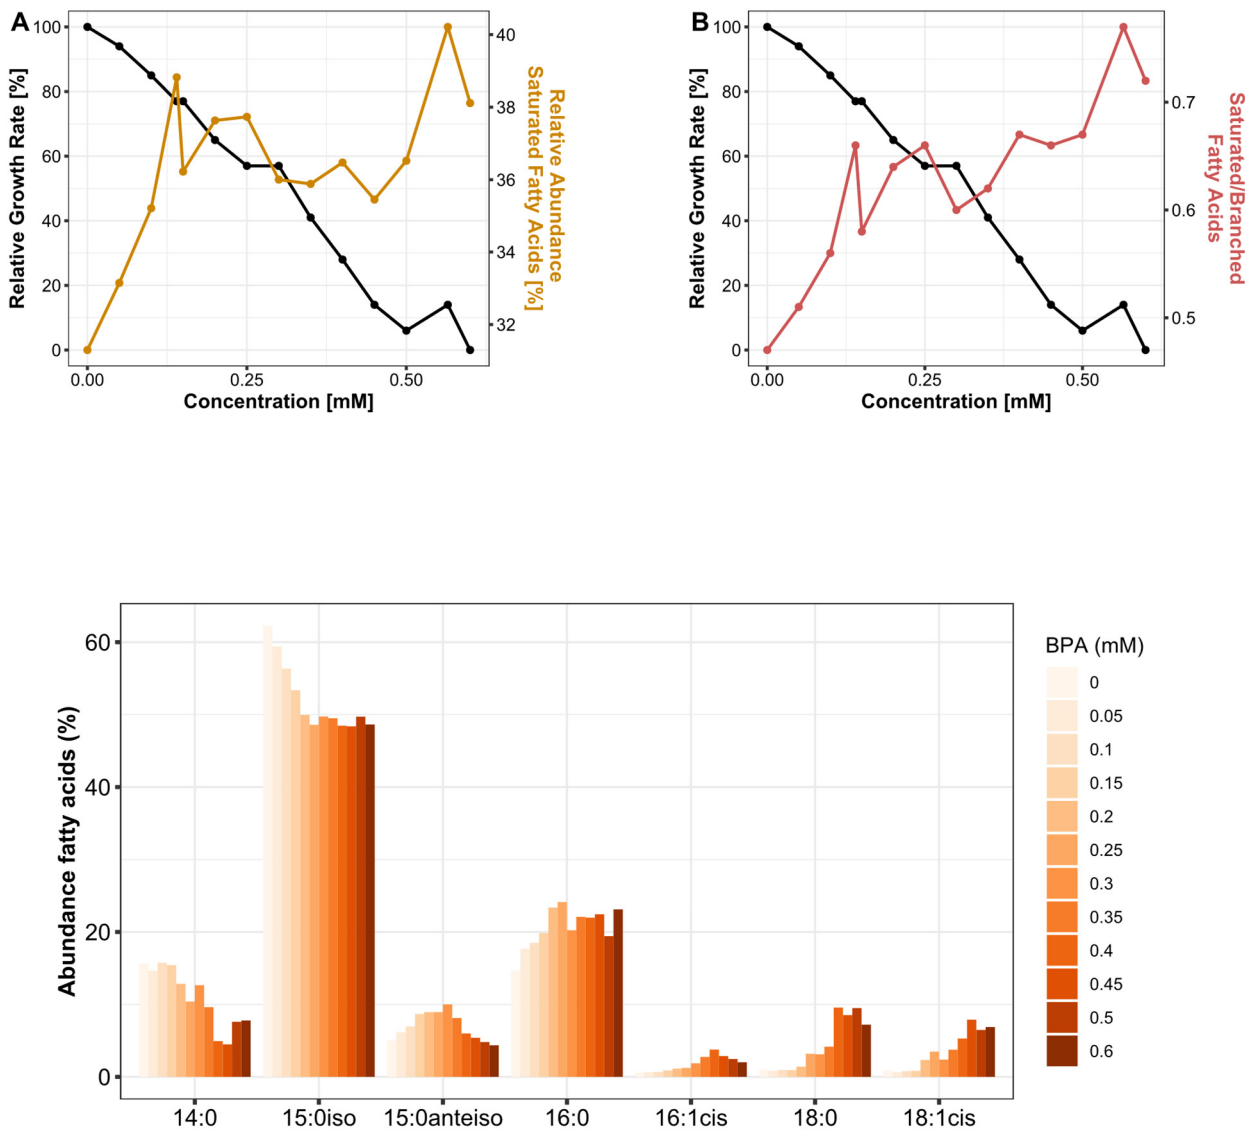

Supplement: s1 [file s1]

Supplementary Figure S5 – FAME BPF

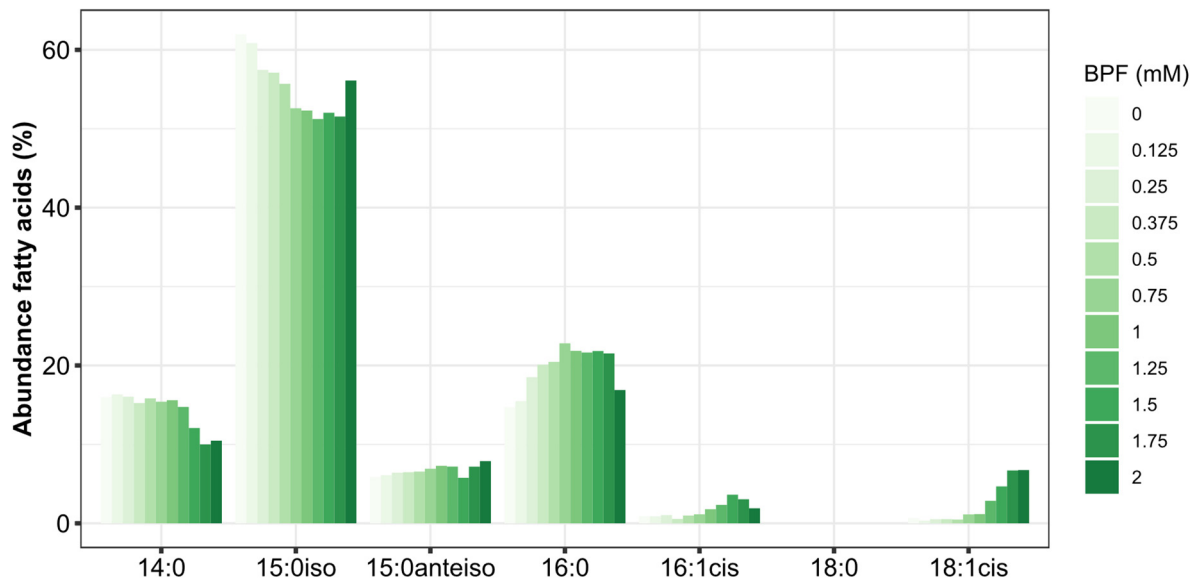

Supplement: s1 [file s1]
